# Supplementary material
Source: publisher figshare collection journal article supplement (https://gsajournals.figshare.com/ndownloader/files/13153070)
Supplement: Supplementary file 1 [file 13153070]

## Sheet: FBF OO 25° vs Hafner
Human ENSG	Human gene symbol	Worm public name	FBF targets (Worm public name)	PUM targets (Human gene symbol)	Gene description
ENSG00000243668, ENSG00000106610, ENSG00000174353, ENSG00000205583, ENSG00000160828, ENSG00000118007, ENSG00000066923, ENSG00000101972	STAG1, STAG2, STAG3L3, STAG3L4, STAG3L1, STAG3	scc-3	scc-3	STAG1, STAG2	Cohesin subunit scc-3 [Source:UniProtKB/Swiss-Prot;Acc:Q19555]
ENSG00000197321	SVIL	viln-1	viln-1	SVIL	VILliN related [Source:UniProtKB/TrEMBL;Acc:P91041]
ENSG00000099917	MED15	sel-8, mdt-15	sel-8
ENSG00000198952, ENSG00000116698, ENSG00000070366	SMG5, SMG6, SMG7	smg-6	smg-6		Suppressor with Morphological effect on Genitalia [Source:UniProtKB/TrEMBL;Acc:Q9BL69]
ENSG00000186642	PDE2A	pde-2	pde-2		Probable 3',5'-cyclic phosphodiesterase pde-2 [Source:UniProtKB/Swiss-Prot;Acc:P30645]
ENSG00000130706	ADRM1	C56G2.7	C56G2.7
ENSG00000108055	SMC3	smc-3	smc-3	SMC3	Structural maintenance of chromosomes protein 3 [Source:UniProtKB/Swiss-Prot;Acc:B2FDA8]
ENSG00000221869, ENSG00000092067	CEBPD, CEBPE	cebp-1, zip-4	zip-4		C/EBP (CCAAT/enhancer-binding protein) homolog [Source:UniProtKB/TrEMBL;Acc:Q18909]
ENSG00000100603	SNW1	skp-1	skp-1		mammalian SKIP (Ski interacting protein) homolog [Source:RefSeq peptide;Acc:NP_505950]
ENSG00000123405, ENSG00000082641, ENSG00000116044, ENSG00000050344	NFE2L1, NFE2, NFE2L2, NFE2L3	sknr-1, skn-1	skn-1	NFE2L2	SKN Related [Source:UniProtKB/TrEMBL;Acc:A0A0M7REQ4]
ENSG00000149577, ENSG00000072858	SIDT2, SIDT1	tag-130, sid-1	sid-1		Systemic RNA interference defective protein 1 [Source:UniProtKB/Swiss-Prot;Acc:Q9GZC8]
ENSG00000155744, ENSG00000122591	FAM126A, FAM126B	D1069.3	D1069.3	FAM126A, FAM126B
ENSG00000134375, ENSG00000267823, ENSG00000126768	TIMM17A, TIMM17B	E04A4.5, D2096.1	D2096.1
ENSG00000119396	RAB14	rab-14	rab-14	RAB14	RAB family [Source:UniProtKB/TrEMBL;Acc:Q93874]
ENSG00000113615, ENSG00000138802	SEC24A, SEC24B	sec-24.2	sec-24.2	SEC24A, SEC24B	Yeast SEC homolog [Source:UniProtKB/TrEMBL;Acc:Q23368]
ENSG00000138385	SSB	C44E4.4	C44E4.4	SSB
ENSG00000150961, ENSG00000176986	SEC24D, SEC24C	sec-24.1	sec-24.1	SEC24D	Yeast SEC homolog [Source:UniProtKB/TrEMBL;Acc:Q19371]
ENSG00000112685	EXOC2	sec-5	sec-5		Exocyst complex component 2 [Source:UniProtKB/Swiss-Prot;Acc:Q22706]
ENSG00000134146	DPH6	E01A2.5	E01A2.5		Diphthine--ammonia ligase [Source:UniProtKB/TrEMBL;Acc:Q966L4]
ENSG00000177646, ENSG00000072778	ACADVL, ACAD9	acdh-12	acdh-12		Acyl CoA DeHydrogenase [Source:UniProtKB/TrEMBL;Acc:Q6AHQ5]
ENSG00000073910, ENSG00000075539	FRYL, FRY	sax-2	sax-2		Sensory AXon guidance [Source:UniProtKB/TrEMBL;Acc:Q5DX48]
ENSG00000132356, ENSG00000162409, ENSG00000174672, ENSG00000160469	BRSK2, PRKAA1, PRKAA2, BRSK1	aak-2, sad-1, aak-1	aak-1		5'-AMP-activated protein kinase catalytic subunit alpha-2 [Source:UniProtKB/Swiss-Prot;Acc:Q95ZQ4]
ENSG00000110711, ENSG00000129221	AIP, AIPL1	C56C10.10	C56C10.10
ENSG00000143434, ENSG00000137872, ENSG00000092421, ENSG00000167680	SEMA6C, SEMA6A, SEMA6B, SEMA6D	smp-1	smp-1		Semaphorin-1A [Source:UniProtKB/Swiss-Prot;Acc:Q17330]
ENSG00000139190, ENSG00000179036, ENSG00000168899, ENSG00000118640, ENSG00000049245, ENSG00000117533, ENSG00000220205	VAMP1, VAMP8, VAMP4, VAMP2, VAMP5, VAMP3	snb-2, Y69A2AR.6, snb-1, B0513.9	snb-1	VAMP4	SyNaptoBrevin related [Source:UniProtKB/TrEMBL;Acc:Q19767]
ENSG00000167962	ZNF598	C52E12.1	C52E12.1
ENSG00000155304	HSPA13	stc-1	stc-1	HSPA13	STCH (Truncated HSP) family [Source:UniProtKB/TrEMBL;Acc:Q20752]
ENSG00000122965	RBM19	rbd-1	rbd-1		RBD (RNA binding domain) protein [Source:UniProtKB/TrEMBL;Acc:A0A061AJ27]
ENSG00000182747, ENSG00000130958, ENSG00000116704	SLC35D3, SLC35D2, SLC35D1	sqv-7	sqv-7		UDP-sugar transporter sqv-7 [Source:UniProtKB/Swiss-Prot;Acc:Q18779]
ENSG00000115652	UXS1	sqv-1	sqv-1		SQuashed Vulva; UDP-glucuronic acid decarboxylase [Source:UniProtKB/TrEMBL;Acc:G5EF65]
ENSG00000100294	MCAT	C50D2.9	C50D2.9
ENSG00000176715	ACSF3	acs-11, acs-21	acs-11		Fatty Acid CoA Synthetase family [Source:UniProtKB/TrEMBL;Acc:Q20264]
ENSG00000196235	SUPT5H	spt-5	spt-5		Transcription elongation factor SPT5 [Source:UniProtKB/Swiss-Prot;Acc:Q21338]
ENSG00000213246	SUPT4H1	spt-4	spt-4		Transcription elongation factor SPT4 [Source:UniProtKB/Swiss-Prot;Acc:Q9TZ93]
ENSG00000006459, ENSG00000197724, ENSG00000172943	PHF8, KDM7A, PHF2	jmjd-1.1, jmjd-1.2	jmjd-1.2	PHF8	JuMonJi (Transcription factor) Domain protein [Source:UniProtKB/TrEMBL;Acc:Q20367]
ENSG00000167771, ENSG00000117625, ENSG00000089902	RCOR1, RCOR3, RCOR2	spr-1, Y74C9A.4	spr-1		REST corepressor spr-1 [Source:UniProtKB/Swiss-Prot;Acc:Q18919]
ENSG00000153879	CEBPG	cebp-2	cebp-2		C/EBP (CCAAT/enhancer-binding protein) homolog [Source:UniProtKB/TrEMBL;Acc:Q8IG69]
ENSG00000135250, ENSG00000096063, ENSG00000184343	SRPK1, SRPK3, SRPK2	spk-1	spk-1	SRPK1, SRPK2	Serine/threonine-protein kinase spk-1 [Source:UniProtKB/Swiss-Prot;Acc:Q03563]
ENSG00000136758, ENSG00000141385	AFG3L2, YME1L1	Y73B3A.21, spg-7, ymel-1	ymel-1	YME1L1
ENSG00000198901	PRC1	spd-1	spd-1	PRC1	SPD-1 [Source:UniProtKB/TrEMBL;Acc:G5ED58]
ENSG00000159322	ADPGK	C50D2.7	C50D2.7		Probable ADP-dependent glucokinase [Source:UniProtKB/Swiss-Prot;Acc:Q86S40]
ENSG00000108848	LUC7L3	Y119D3B.12, C50D2.8	Y119D3B.12
ENSG00000018189, ENSG00000177548, ENSG00000176783, ENSG00000204130, ENSG00000029725	RUFY3, RUFY1, RUFY2, RABEP2, RABEP1	rabn-5	rabn-5		RABaptiN (Rab effector) [Source:UniProtKB/TrEMBL;Acc:Q19088]
ENSG00000117139, ENSG00000012817, ENSG00000126012, ENSG00000008083, ENSG00000073614	KDM5D, KDM5B, JARID2, KDM5C, KDM5A	rbr-2	rbr-2		Lysine-specific demethylase rbr-2 [Source:UniProtKB/Swiss-Prot;Acc:Q23541]
ENSG00000131873, ENSG00000198108	CHSY1, CHSY3	sqv-5	sqv-5	CHSY1, CHSY3	Chondroitin sulfate synthase sqv-5 [Source:UniProtKB/Swiss-Prot;Acc:Q7Z1Z1]
ENSG00000118197, ENSG00000174243	DDX59, DDX23	ddx-23	ddx-23	DDX59	DEAD boX helicase homolog [Source:UniProtKB/TrEMBL;Acc:Q95QN2]
ENSG00000123992	DNPEP	dnpp-1	dnpp-1	DNPEP	Aspartyl aminopeptidase [Source:UniProtKB/Swiss-Prot;Acc:Q19087]
ENSG00000111785, ENSG00000177963	RIC8B, RIC8A	ric-8	ric-8	RIC8B	Synembryn [Source:UniProtKB/Swiss-Prot;Acc:Q9GSX9]
ENSG00000135829, ENSG00000132153, ENSG00000067248, ENSG00000174953, ENSG00000163214, ENSG00000047188, ENSG00000156414	DHX29, TDRD9, DHX36, DHX30, YTHDC2, DHX9, DHX57	F52B5.3, rha-1	F52B5.3	YTHDC2, DHX36
ENSG00000135473	PAN2	panl-2	panl-2		PAN (PolyA-specific riboNucLease) subunit [Source:RefSeq peptide;Acc:NP_498519]
ENSG00000108264, ENSG00000173011	TADA2B	ada-2	ada-2		ADA (Histone acetyltransferase complex) subunit [Source:UniProtKB/TrEMBL;Acc:Q5DX44]
ENSG00000180182	MED14	rgr-1	rgr-1	MED14	Mediator of RNA polymerase II transcription subunit 14 [Source:UniProtKB/Swiss-Prot;Acc:Q03570]
ENSG00000163918	RFC4	rfc-4	rfc-4		Replication factor C subunit 4 [Source:UniProtKB/Swiss-Prot;Acc:P53016]
ENSG00000133119	RFC3	rfc-3	rfc-3		RFC (DNA replication factor) family [Source:UniProtKB/TrEMBL;Acc:Q18547]
ENSG00000108469	RECQL5	rcq-5	rcq-5		ReCQ DNA helicase family [Source:UniProtKB/TrEMBL;Acc:Q19046]
ENSG00000118873	RAB3GAP2	rbg-2	rbg-2	RAB3GAP2	Rab3 GTPase-activating protein regulatory subunit [Source:UniProtKB/Swiss-Prot;Acc:Q22670]
ENSG00000123728, ENSG00000181467, ENSG00000125249	RAP2B, RAP2C, RAP2A	rap-2	rap-2	RAP2C	RAP homolog (Vertebrate Rap GTPase family) [Source:UniProtKB/TrEMBL;Acc:O17599]
ENSG00000101557	USP14	usp-14	usp-14	USP14	Ubiquitin carboxyl-terminal hydrolase 14 [Source:UniProtKB/Swiss-Prot;Acc:Q17361]
ENSG00000135972	MRPS9	mrps-9	mrps-9	MRPS9	Probable 40S ribosomal protein S9, mitochondrial [Source:UniProtKB/Swiss-Prot;Acc:P34388]
ENSG00000130024	PHF10	phf-10	phf-10	PHF10	PHd Finger family [Source:UniProtKB/TrEMBL;Acc:Q2A949]
ENSG00000180198, SNHG3-RCC1	RCC1	ran-3	ran-3		Regulator of chromosome condensation [Source:UniProtKB/Swiss-Prot;Acc:Q18211]
ENSG00000100401	RANGAP1	ran-2	ran-2		Ran GTPase-activating protein 2 [Source:UniProtKB/Swiss-Prot;Acc:P34342]
ENSG00000182150, ENSG00000085999, ENSG00000197275	ERCC6L2, RAD54L, RAD54B	rad-54, Y116A8C.13	rad-54, Y116A8C.13	RAD54B
ENSG00000185379, ENSG00000051180, ENSG00000100206, ENSG00000182185, ENSG00000108384	RAD51B, DMC1, RAD51C, RAD51D, RAD51	rad-51	rad-51		RAD51 short isoform; RecA/Rad51/Dmc1-like protein [Source:UniProtKB/TrEMBL;Acc:G5EGG8]
ENSG00000182197, ENSG00000158008	EXT1, EXTL1	rib-1	rib-1		Exostosin-1 homolog [Source:UniProtKB/Swiss-Prot;Acc:O01704]
ENSG00000069188, ENSG00000146555	SDK2, SDK1	rig-4	rig-4	SDK1	Protein sidekick homolog [Source:UniProtKB/Swiss-Prot;Acc:Q9N3X8]
ENSG00000144785, ENSG00000146910, ENSG00000257727	CNPY2, CNPY1, RP11-977G19.10	F01F1.15	F01F1.15
ENSG00000155189	AGPAT5	acl-11	acl-11	AGPAT5	ACyLtransferase-like [Source:UniProtKB/TrEMBL;Acc:Q95R12]
ENSG00000124562	SNRPC	F08B4.7	F08B4.7		U1 small nuclear ribonucleoprotein C [Source:UniProtKB/Swiss-Prot;Acc:P90815]
ENSG00000177954, ENSG00000227081, ENSG00000185088	RP11-543P15.1, RPS27L, RPS27	rps-27	rps-27		40S ribosomal protein S27 [Source:UniProtKB/Swiss-Prot;Acc:Q9TXP0]
ENSG00000077312, ENSG00000125870	SNRPB2, SNRPA	rnp-3, rnp-2	rnp-3	SNRPB2	RNP (RRM RNA binding domain) containing [Source:UniProtKB/TrEMBL;Acc:U4PBX2]
ENSG00000162869	PPP1R21	F33E11.3	F33E11.3
ENSG00000214255, ENSG00000228981, ENSG00000196183, ENSG00000197149, ENSG00000140988	RPS2P6, RPS2P4, RP11-364L4.1, RP11-452G18.2, RPS2	rps-2	rps-2		40S ribosomal protein S2 [Source:UniProtKB/Swiss-Prot;Acc:P51403]
ENSG00000143093, ENSG00000128578	STRIP1, STRIP2	farl-11	farl-11		FAR (Factor ARrest) Like [Source:UniProtKB/TrEMBL;Acc:A0A1D3PD01]
ENSG00000108671	PSMD11	rpn-6.2, rpn-6.1	rpn-6.1		Probable 26S proteasome regulatory subunit rpn-6.2 [Source:UniProtKB/Swiss-Prot;Acc:P34481]
ENSG00000132383	RPA1	rpa-1	rpa-1		Probable replication factor A 73 kDa subunit [Source:UniProtKB/Swiss-Prot;Acc:Q19537]
ENSG00000160294	MCM3AP	F20D12.2	F20D12.2
ENSG00000140995	DEF8	F20H11.1	F20H11.1		Differentially expressed in FDCP 8 homolog [Source:UniProtKB/Swiss-Prot;Acc:O01738]
ENSG00000122008	POLK	polk-1	polk-1	POLK	DNA polymerase kappa [Source:UniProtKB/Swiss-Prot;Acc:P34409]
ENSG00000185246	PRPF39	F25B4.5	F25B4.5	PRPF39
ENSG00000116747	TROVE2	rop-1	rop-1	TROVE2	60 kDa SS-A/Ro ribonucleoprotein homolog [Source:UniProtKB/Swiss-Prot;Acc:Q27274]
ENSG00000235183, ENSG00000140319	RP11-613C6.4, SRP14	F25G6.9, F25G6.8	F25G6.9, F25G6.8
ENSG00000163882	POLR2H	rpb-8	rpb-8		Probable DNA-directed RNA polymerases I, II, and III subunit RPABC3 [Source:UniProtKB/Swiss-Prot;Acc:Q19826]
ENSG00000165934	CPSF2	cpsf-2	cpsf-2	CPSF2	Probable cleavage and polyadenylation specificity factor subunit 2 [Source:UniProtKB/Swiss-Prot;Acc:O17403]
ENSG00000183574, ENSG00000204308, ENSG00000206254, ENSG00000138942	RNF5, RNF185	rnf-5	rnf-5		RING finger protein 5 [Source:UniProtKB/Swiss-Prot;Acc:Q09463]
ENSG00000241519, ENSG00000198833	UBE2J1	ubc-6	ubc-6		UBiquitin Conjugating enzyme [Source:UniProtKB/TrEMBL;Acc:Q18931]
ENSG00000143486	EIF2D	C25H3.4	C25H3.4
ENSG00000182473	EXOC7	exoc-7	exoc-7		EXOCyst component [Source:UniProtKB/TrEMBL;Acc:P91149]
ENSG00000065609, ENSG00000073921	PICALM, SNAP91	unc-11	unc-11		Phosphatidylinositol-binding clathrin assembly protein unc-11 [Source:UniProtKB/Swiss-Prot;Acc:Q9XZI6]
ENSG00000138468, ENSG00000112701	SENP7, SENP6	ulp-4, ulp-2	ulp-4, ulp-2	SENP6	Ubiquitin-like protease 4 [Source:UniProtKB/Swiss-Prot;Acc:Q09275]
ENSG00000163904, ENSG00000119231, ENSG00000079387, ENSG00000161956	SENP5, SENP1, SENP3, SENP2	ulp-1	ulp-1		Sentrin-specific protease [Source:UniProtKB/Swiss-Prot;Acc:Q09353]
ENSG00000070010	UFD1L	ufd-1	ufd-1		Ubiquitin fusion degradation protein 1 homolog [Source:UniProtKB/Swiss-Prot;Acc:Q19584]
ENSG00000244687, ENSG00000240849, ENSG00000124208, ENSG00000169139	TMEM189, UBE2V1, TMEM189-UBE2V1, UBE2V2	Y53C10A.5, uev-1	uev-1	UBE2V2
ENSG00000153291	SLC25A27	ucp-4	ucp-4	SLC25A27	UnCoupling Protein (Mitochondrial substrate carrier) [Source:UniProtKB/TrEMBL;Acc:O01883]
ENSG00000158560, ENSG00000162643, ENSG00000077380, ENSG00000152763, ENSG00000171595, ENSG00000119333, ENSG00000122735	DNAI2, WDR63, WDR34, DNAI1, DYNC1I1, DYNC1I2, WDR78	dyci-1	dyci-1		DYnein Chain, light Intermediate [Source:UniProtKB/TrEMBL;Acc:O45087]
ENSG00000155275	TRMT44	C23G10.7	C23G10.7		Probable tRNA (uracil-O(2)-)-methyltransferase [Source:UniProtKB/Swiss-Prot;Acc:Q45EK7]
ENSG00000104343	UBE2W	ubc-16	ubc-16	UBE2W	UBiquitin Conjugating enzyme [Source:UniProtKB/TrEMBL;Acc:Q9XWF6]
ENSG00000021574, ENSG00000132436, ENSG00000182263	FIGNL1, SPAST, FIGN	spas-1, figl-1	figl-1	SPAST, FIGN	Probable spastin homolog spas-1 [Source:UniProtKB/Swiss-Prot;Acc:Q8MNV0]
ENSG00000137845	ADAM10	sup-17	sup-17		ADAM 10; SUPpressor [Source:UniProtKB/TrEMBL;Acc:G5EFD9]
ENSG00000061936	SFSWAP	swp-1	swp-1		Splicing factor (Suppressor of White aPricot) related [Source:UniProtKB/TrEMBL;Acc:H2KY78]
ENSG00000048707	VPS13D	C25H3.8	C25H3.8
ENSG00000144580	RQCD1	ntl-9	ntl-9	RQCD1	NOT-Like (Yeast CCR4/NOT complex component) [Source:UniProtKB/TrEMBL;Acc:Q18224]
ENSG00000139428	MMAB	mmab-1	mmab-1	MMAB	MethylMalonic Aciduria type B homolog [Source:UniProtKB/TrEMBL;Acc:Q18218]
ENSG00000052344, ENSG00000169035, ENSG00000167751, ENSG00000172236, ENSG00000010438, ENSG00000103355, ENSG00000197253, ENSG00000204983	PRSS3, TPSB2, KLK2, PRSS33, KLK7, PRSS8, TPSAB1, PRSS1	try-1	try-1		TRYpsin-like protease [Source:UniProtKB/TrEMBL;Acc:Q23528]
ENSG00000182158, ENSG00000157613	CREB3L1, CREB3L2	crh-2	crh-2	CREB3L2	CREB Homolog [Source:UniProtKB/TrEMBL;Acc:Q4JFH9]
ENSG00000174332, ENSG00000107249	GLIS3, GLIS1	tra-1	tra-1		Sex-determining transformer protein 1 [Source:UniProtKB/Swiss-Prot;Acc:P34708]
ENSG00000243725	TTC4	C17G10.2	C17G10.2
ENSG00000138834, ENSG00000008294	SPAG9, MAPK8IP3	unc-16	unc-16		JNK-interacting protein [Source:UniProtKB/Swiss-Prot;Acc:P34609]
ENSG00000177302	TOP3A	top-3	top-3		DNA topoisomerase 3 [Source:UniProtKB/Swiss-Prot;Acc:O61660]
ENSG00000078269, ENSG00000159082	SYNJ1, SYNJ2	unc-26	unc-26	SYNJ1	Synaptojanin [Source:UniProtKB/Swiss-Prot;Acc:G5ECL2]
ENSG00000163754, ENSG00000056998, ENSG00000206159	GYG2P1, GYG1, GYG2	gyg-2, M116.2, gyg-1	gyg-2		GlYcoGenin like [Source:UniProtKB/TrEMBL;Acc:O45819]
ENSG00000182670	TTC3	C09E7.8, C09E7.7, F27B3.5, C09E7.9	C09E7.8
ENSG00000167965	MLST8	C10H11.8	C10H11.8
ENSG00000108669, ENSG00000008256, ENSG00000100055, ENSG00000105443	CYTH1, CYTH4, CYTH3, CYTH2	grp-1	grp-1	CYTH3, CYTH1	GTP exchange factor for ARFs 1 [Source:UniProtKB/Swiss-Prot;Acc:P34512]
ENSG00000095002	MSH2	msh-2	msh-2	MSH2	MSH (MutS Homolog) family [Source:UniProtKB/TrEMBL;Acc:Q9TXR4]
ENSG00000166337	TAF10	taf-10	taf-10		Transcription initiation factor TFIID subunit 10 [Source:UniProtKB/TrEMBL;Acc:Q95ZS0]
ENSG00000182944, ENSG00000172660, ENSG00000089280	FUS, EWSR1	fust-1, F10E7.2	F10E7.2	EWSR1	FUS/TLS RNA binding protein homolog [Source:UniProtKB/TrEMBL;Acc:A0A1N7SYQ6]
ENSG00000171055, ENSG00000149557	FEZ2, FEZ1	unc-76	unc-76		UNC-76 [Source:UniProtKB/TrEMBL;Acc:Q7JNU9]
ENSG00000153130	SCOC	unc-69	unc-69	SCOC	Short coiled-coil domain-containing protein UNC-69 splice variant T07A5.6b [Source:UniProtKB/TrEMBL;Acc:G5EDQ5]
ENSG00000153006	SREK1IP1	C13F10.7	C13F10.7
ENSG00000154997, ENSG00000138758, ENSG00000125354, ENSG00000164402, ENSG00000186522	SEPT6, SEPT11, SEPT8, SEPT10, SEPT14	unc-61	unc-61
ENSG00000067177, ENSG00000044446	PHKA1, PHKA2	C14B9.8	C14B9.8		Probable phosphorylase b kinase regulatory subunit alpha [Source:UniProtKB/Swiss-Prot;Acc:P34335]
ENSG00000120555, ENSG00000214765, ENSG00000184702, ENSG00000122545, ENSG00000108387, ENSG00000180096, ENSG00000168385	SEPT7, SEPT2, SEPT7P2, SEPT7P9, SEPT1, SEPT4, SEPT5	unc-59	unc-59
ENSG00000125166, ENSG00000120053, ENSG00000169154	GOT2, GOT1, GOT1L1	got-1.1, got-2.2, got-1.2, got-1.3, got-2.1	got-2.1
ENSG00000067141, ENSG00000187323	NEO1, DCC	unc-40	unc-40	DCC	Unc-40 protein [Source:UniProtKB/TrEMBL;Acc:G5EF96]
ENSG00000235418, ENSG00000196781, ENSG00000104964, ENSG00000106829, ENSG00000104953, ENSG00000065717, ENSG00000140332	TLE4, AES, TLE3, TLE6, TLE1, TLE2	unc-37	unc-37	TLE1	Transcription factor unc-37 [Source:UniProtKB/Swiss-Prot;Acc:O02482]
ENSG00000033627, ENSG00000185344, ENSG00000105929, ENSG00000110719	ATP6V0A2, ATP6V0A1, TCIRG1, ATP6V0A4	unc-32, vha-5, vha-6, vha-7	vha-7		Probable V-type proton ATPase 116 kDa subunit a [Source:UniProtKB/Swiss-Prot;Acc:P30628]
ENSG00000121988, ENSG00000138375	ZRANB3, SMARCAL1	C16A3.1	C16A3.1
ENSG00000138111	TMEM180	C27H5.4, F28B3.5, F10E7.3	F28B3.5
ENSG00000132740	IGHMBP2	eri-7	eri-7		Enhanced RNAI (RNA interference) [Source:UniProtKB/TrEMBL;Acc:O01976]
ENSG00000162236	STX5	syx-5	syx-5		Putative syntaxin-5 [Source:UniProtKB/Swiss-Prot;Acc:Q20797]
ENSG00000092148	HECTD1	hecd-1	hecd-1	HECTD1	HECtD1 ubiquitin ligase homolog [Source:UniProtKB/TrEMBL;Acc:V6CJX7]
ENSG00000097046	CDC7	cdc-7	cdc-7	CDC7	Cell Division Cycle related [Source:UniProtKB/TrEMBL;Acc:O01493]
ENSG00000154783, ENSG00000180263	FGD6, FGD5	tag-77	tag-77
ENSG00000123594, ENSG00000066427	ATXN3L, ATXN3	atx-3	atx-3		Ataxin-3 homolog [Source:UniProtKB/Swiss-Prot;Acc:O17850]
ENSG00000101349, ENSG00000137843, ENSG00000130669	PAK7, PAK6, PAK4	pak-2	pak-2		Serine/threonine-protein kinase pak-2 [Source:UniProtKB/Swiss-Prot;Acc:G5EFU0]
ENSG00000168906, ENSG00000151224	MAT1A, MAT2A	sams-4, sams-5, sams-1, sams-3	sams-3		Probable S-adenosylmethionine synthase 4 [Source:UniProtKB/Swiss-Prot;Acc:P50306]
ENSG00000155876, ENSG00000083750	RRAGA, RRAGB	raga-1	raga-1		RAs-related GTP-binding protein A [Source:UniProtKB/TrEMBL;Acc:Q22743]
ENSG00000173145	NOC3L	C37H5.5	C37H5.5		Nucleolar complex protein 3 homolog [Source:UniProtKB/Swiss-Prot;Acc:P91136]
ENSG00000205726, ENSG00000198399	ITSN2, ITSN1	itsn-1	itsn-1	ITSN2	ITSN (Intersectin) family [Source:UniProtKB/TrEMBL;Acc:E6N0W0]
ENSG00000215760, ENSG00000085231, ENSG00000187325, ENSG00000185057	TAF9BP2, AK6, TAF9B	E02H1.6, taf-9	E02H1.6		Adenylate kinase isoenzyme 6 homolog [Source:UniProtKB/Swiss-Prot;Acc:Q09527]
ENSG00000156931	VPS8	C42C1.4	C42C1.4
ENSG00000141424, ENSG00000104635, ENSG00000138821	SLC39A6, SLC39A8, SLC39A14	tag-140, Y55F3BL.2	Y55F3BL.2	SLC39A6, SLC39A14
ENSG00000028839	TBPL1	tlf-1	tlf-1		TBP-Like Factor; TBP-like factor [Source:UniProtKB/TrEMBL;Acc:G5EC52]
ENSG00000075239, ENSG00000167315, ENSG00000111666, ENSG00000138018, ENSG00000120437, ENSG00000134255	CEPT1, ACAT1, ACAT2, ACAA2, EPT1, CHPT1	F53A2.7, T02G5.4, F54D7.2, cept-1, kat-1, Y49A3A.1, T02G5.7	T02G5.7
ENSG00000173540	GMPPB	tag-335	tag-335		Mannose-1-phosphate guanyltransferase beta [Source:UniProtKB/Swiss-Prot;Acc:A3QMC8]
ENSG00000147133, ENSG00000122728	TAF1, TAF1L	taf-1	taf-1	TAF1	Transcription initiation factor TFIID subunit 1 [Source:UniProtKB/Swiss-Prot;Acc:G5EGM3]
ENSG00000100813, ENSG00000137776, ENSG00000160633, ENSG00000130254, ENSG00000164597	SAFB2, SAFB, ACIN1, COG5, SLTM	cogc-5, acin-1	cogc-5, acin-1	COG5	Conserved Oligomeric Golgi (COG) Component [Source:UniProtKB/TrEMBL;Acc:P91151]
ENSG00000047410	TPR	npp-21, syp-1	npp-21, syp-1	TPR	Nuclear Pore complex Protein [Source:UniProtKB/TrEMBL;Acc:Q5WRT9]
ENSG00000178719, ENSG00000135472, ENSG00000155957, ENSG00000135926	TMBIM4, FAIM2, GRINA, TMBIM1	tag-120, xbx-6, tmbi-4, Y42H9AR.2	xbx-6	TMBIM4
ENSG00000196981, ENSG00000196363	WDR5B, WDR5	wdr-5.3, wdr-5.2, wdr-5.1	wdr-5.3		WD repeat-containing protein wdr-5.3 [Source:UniProtKB/Swiss-Prot;Acc:Q23256]
ENSG00000173114, ENSG00000170382, ENSG00000175928	LRRN3, LRRN2, LRRN1	tol-1	tol-1		TOLl (Drosophila) family [Source:UniProtKB/TrEMBL;Acc:Q9N5Z3]
ENSG00000114902	SPCS1	C34B2.10	C34B2.10	SPCS1	Probable signal peptidase complex subunit 1 [Source:UniProtKB/Swiss-Prot;Acc:O44953]
ENSG00000152683	SLC30A6	toc-1	toc-1		Similar to Transporter Of divalent Cations [Source:UniProtKB/TrEMBL;Acc:Q23281]
ENSG00000170807, ENSG00000163431, ENSG00000163380, ENSG00000138594, ENSG00000163157, ENSG00000136842, ENSG00000128872	TMOD3, LMOD3, LMOD1, TMOD1, TMOD2, TMOD4, LMOD2	tmd-2, unc-94	unc-94		TropoMoDulin [Source:UniProtKB/TrEMBL;Acc:H2KYK4]
ENSG00000025770	NCAPH2	kle-2	kle-2		Condensin-2 complex subunit kle-2 [Source:UniProtKB/Swiss-Prot;Acc:P34341]
ENSG00000070367	EXOC5	sec-10	sec-10	EXOC5	Exocyst complex component 5 [Source:UniProtKB/Swiss-Prot;Acc:Q18406]
ENSG00000134809	TIMM10	tin-10	tin-10		Mitochondrial import inner membrane translocase subunit Tim10 [Source:UniProtKB/Swiss-Prot;Acc:Q9Y0V6]
ENSG00000111602	TIMELESS	tim-1	tim-1		Protein timeless homolog [Source:UniProtKB/Swiss-Prot;Acc:G5EDN3]
ENSG00000167900	TK1	thk-1	thk-1		Thymidine kinase [Source:UniProtKB/TrEMBL;Acc:G5EEZ5]
ENSG00000115540	MOB4	C30A5.3	C30A5.3
ENSG00000169217	CD2BP2	teg-1	teg-1		Tumorous Enhancer of Glp-1(Gf) [Source:UniProtKB/TrEMBL;Acc:Q9NAH3]
ENSG00000131462, ENSG00000037042	TUBG2, TUBG1	tbg-1	tbg-1		Tubulin gamma chain [Source:UniProtKB/Swiss-Prot;Acc:P34475]
ENSG00000083123	BCKDHB	tag-173	tag-173	BCKDHB
ENSG00000133247, ENSG00000110066	SUV420H1, SUV420H2	set-4	set-4	SUV420H1	Histone-lysine N-methyltransferase Suv4-20 [Source:UniProtKB/Swiss-Prot;Acc:Q09265]
ENSG00000117859	OSBPL9	obr-4	obr-4		Oxysterol-binding protein [Source:UniProtKB/TrEMBL;Acc:O01686]
ENSG00000206217, ENSG00000229802, ENSG00000224399, ENSG00000226614, ENSG00000227402, ENSG00000206288, ENSG00000112473	SLC39A7	hke-4.1, hke-4.2	hke-4.1
ENSG00000164091	WDR82	swd-2.1, swd-2.2	swd-2.1, swd-2.2		Set1 WD40 repeat protein homolog [Source:UniProtKB/TrEMBL;Acc:Q18404]
ENSG00000110925, ENSG00000178662, ENSG00000144655	CSRNP1, CSRNP2, CSRNP3	C41D11.3	C41D11.3
ENSG00000099246	RAB18	rab-18	rab-18	RAB18	Ras-related protein Rab-18 [Source:UniProtKB/Swiss-Prot;Acc:Q8MXS1]
ENSG00000138069, ENSG00000111737, ENSG00000174903	RAB35, RAB1A, RAB1B	rab-1, rab-35	rab-35	RAB1A	RAB family [Source:UniProtKB/TrEMBL;Acc:Q9UAQ6]
ENSG00000009790, ENSG00000128596, ENSG00000163681	SLMAP, TRAF3IP3, CCDC136	M4.1	M4.1
ENSG00000100029	PES1	lpd-7	lpd-7		Pescadillo homolog [Source:UniProtKB/Swiss-Prot;Acc:Q95Y89]
ENSG00000004897	CDC27	mat-1	mat-1		Cell division cycle protein 27 homolog [Source:UniProtKB/Swiss-Prot;Acc:Q9N593]
ENSG00000165678	GHITM	K11H12.8	K11H12.8
ENSG00000124299, ENSG00000196236	XPNPEP3, PEPD	K12C11.1, R119.2	K12C11.1
ENSG00000118705	RPN2	ostd-1	ostd-1		Dolichyl-diphosphooligosaccharide--protein glycosyltransferase subunit 2 [Source:UniProtKB/Swiss-Prot;Acc:P91390]
ENSG00000130340, ENSG00000178996, ENSG00000173548	SNX18, SNX33, SNX9	lst-4	lst-4	SNX9	Sorting nexin lst-4 [Source:UniProtKB/Swiss-Prot;Acc:Q8I4E2]
ENSG00000132792	CTNNBL1	M01E11.2	M01E11.2
ENSG00000130332	LSM7	lsm-7	lsm-7		LSM Sm-like protein [Source:UniProtKB/TrEMBL;Acc:Q23543]
ENSG00000106355	LSM5	lsm-5	lsm-5	LSM5	LSM Sm-like protein [Source:UniProtKB/TrEMBL;Acc:O18694]
ENSG00000011376	LARS2	lars-2	lars-2		Leucyl Amino-acyl tRNA Synthetase [Source:UniProtKB/TrEMBL;Acc:Q23511]
ENSG00000261283, ENSG00000128563	PRKRIP1	F37A4.2	F37A4.2
ENSG00000132613, ENSG00000170873	MTSS1L, MTSS1	M04F3.5	M04F3.5
ENSG00000102882, ENSG00000100030, ENSG00000166484	MAPK7, MAPK1, MAPK3	F09C12.2, mpk-1, mpk-2	mpk-1	MAPK1	Mitogen-activated protein kinase [Source:UniProtKB/TrEMBL;Acc:Q19243]
ENSG00000020922	MRE11A	mre-11	mre-11		Double-strand break repair protein mre-11 [Source:UniProtKB/Swiss-Prot;Acc:Q23255]
ENSG00000087095	NLK	lit-1	lit-1		Serine/threonine kinase NLK [Source:UniProtKB/Swiss-Prot;Acc:Q9U9Y8]
ENSG00000130829, ENSG00000112679, ENSG00000184545, ENSG00000143507, ENSG00000139318, ENSG00000111266, ENSG00000149599, ENSG00000164086	DUSP15, DUSP7, DUSP22, DUSP8, DUSP6, DUSP16, DUSP10, DUSP9	F13D11.3, lip-1, C16A3.2, vhp-1	lip-1, C16A3.2	DUSP8, DUSP16
ENSG00000100395, ENSG00000163935, ENSG00000198879, ENSG00000011258	MBTD1, SFMBT2, L3MBTL2, SFMBT1	mbtr-1, lin-61	lin-61	SFMBT2	Malignant brain tumor repeat protein 1 [Source:UniProtKB/Swiss-Prot;Acc:A0SQM0]
ENSG00000152217, ENSG00000181555, ENSG00000152455, ENSG00000101945, ENSG00000116539	SETBP1, SETD2, SUV39H1, SUV39H2, ASH1L	met-1, lin-59, set-12, set-25	met-1, set-25	ASH1L, SETD2	Histone-lysine N-methyltransferase [Source:UniProtKB/TrEMBL;Acc:A4LBC3]
ENSG00000161395	PGAP3	R01B10.4	R01B10.4
ENSG00000153107	ANAPC1	mat-2	mat-2		Anaphase-promoting complex subunit 1 [Source:UniProtKB/Swiss-Prot;Acc:O18191]
ENSG00000129933	MAU2	mau-2	mau-2		Maternal uncoordinated protein 2 [Source:UniProtKB/Swiss-Prot;Acc:O17581]
ENSG00000198826	ARHGAP11A	rga-3, rga-4	rga-3, rga-4		Rho GTPase Activating protein [Source:UniProtKB/TrEMBL;Acc:O01585]
ENSG00000136982	DSCC1	K09H9.2	K09H9.2
ENSG00000230961, ENSG00000230293, ENSG00000237333, ENSG00000096474, ENSG00000235222, ENSG00000233345, ENSG00000204410, ENSG00000235569, ENSG00000227314	MSH5	msh-5	msh-5		MutS protein homolog 5 [Source:UniProtKB/Swiss-Prot;Acc:Q19272]
ENSG00000175324	LSM1	lsm-1	lsm-1	LSM1	LSM Sm-like protein [Source:UniProtKB/TrEMBL;Acc:Q20229]
ENSG00000188833, ENSG00000138185, ENSG00000168032, ENSG00000198018, ENSG00000054179, ENSG00000197217	ENTPD7, ENTPD4, ENTPD8, ENTPD3, ENTPD1, ENTPD2	mig-23, ntp-1	ntp-1	ENTPD7	Nucleoside-diphosphatase mig-23 [Source:UniProtKB/Swiss-Prot;Acc:Q21815]
ENSG00000215769, ENSG00000185467, ENSG00000182481	KPNA7, KPNA2, RP13-104F24.2	ima-2	ima-2	KPNA2	Importin subunit alpha-2 [Source:UniProtKB/Swiss-Prot;Acc:P91276]
ENSG00000112118	MCM3	mcm-3	mcm-3		DNA helicase [Source:UniProtKB/TrEMBL;Acc:Q9XVR7]
ENSG00000050130	JKAMP	jamp-1	jamp-1		JAMP (JNK1-Associated Membrane Protein) homolog; Seven transmembrane protein [Source:UniProtKB/TrEMBL;Acc:G5EBX4]
ENSG00000132382	MYBBP1A	K04C2.2	K04C2.2
ENSG00000099977, ENSG00000099974	DDT, DDTL	mif-2, mif-3	mif-3		MIF-like protein mif-2 [Source:UniProtKB/Swiss-Prot;Acc:Q18785]
ENSG00000077458, ENSG00000009780	FAM76A, FAM76B	K04F10.7	K04F10.7	FAM76B
ENSG00000109685, ENSG00000147548, ENSG00000165671	WHSC1, WHSC1L1, NSD1	mes-4	mes-4	WHSC1	Histone-lysine N-methyltransferase mes-4 [Source:UniProtKB/Swiss-Prot;Acc:Q9NH52]
		mel-28	mel-28
ENSG00000144228, ENSG00000121067	SPOPL, SPOP	bath-43, bath-44, mel-26	bath-44		BTB and MATH domain-containing protein 43 [Source:UniProtKB/Swiss-Prot;Acc:P34568]
ENSG00000102781, ENSG00000186625	KATNAL1, KATNA1	mei-1	mei-1	KATNAL1	Meiotic spindle formation protein mei-1 [Source:UniProtKB/Swiss-Prot;Acc:P34808]
ENSG00000148377, ENSG00000067064	IDI2, IDI1	idi-1	idi-1	IDI1	Isopentenyl Diphosphate Isomerase; Isopentenyl-diphosphate isomerase [Source:UniProtKB/TrEMBL;Acc:G5EFQ1]
ENSG00000133997	MED6	mdt-6	mdt-6	MED6	Mediator of RNA polymerase II transcription subunit 6 [Source:UniProtKB/Swiss-Prot;Acc:Q9N337]
ENSG00000076003	MCM6	mcm-6	mcm-6		DNA replication licensing factor mcm-6 [Source:UniProtKB/Swiss-Prot;Acc:P34647]
ENSG00000096070, ENSG00000100425, ENSG00000156983	BRPF1, BRD1, BRPF3	lin-49	lin-49	BRD1, BRPF3
ENSG00000228875, ENSG00000224774, ENSG00000224398, ENSG00000230700, ENSG00000232960, ENSG00000204435, ENSG00000206406	CSNK2B	kin-10	kin-10		Casein kinase II subunit beta [Source:UniProtKB/Swiss-Prot;Acc:P28548]
ENSG00000128016, ENSG00000185650, ENSG00000152518	ZFP36L1, ZFP36, ZFP36L2	oma-2, moe-3, oma-1, ccch-1	oma-1	ZFP36L1, ZFP36L2	CCCH-type zinc finger protein oma-2 [Source:UniProtKB/Swiss-Prot;Acc:Q23359]
ENSG00000157764, ENSG00000132155, ENSG00000078061	ARAF, BRAF, RAF1	lin-45	lin-45	ARAF, BRAF	Raf homolog serine/threonine-protein kinase [Source:UniProtKB/Swiss-Prot;Acc:Q07292]
ENSG00000110786, ENSG00000143851, ENSG00000153233	PTPN7, PTPRR, PTPN5	egg-5, egg-4	egg-4, egg-5		EGG sterile (Unfertilizable) [Source:UniProtKB/TrEMBL;Acc:O61789]
ENSG00000134121, ENSG00000163531, ENSG00000091129, ENSG00000198910	CHL1, NRCAM, L1CAM, NFASC	lad-2, sax-7	sax-7	NRCAM	Immunoglobulin domain-containing protein Y54G2A.25; L1 CAM ADhesion molecule homolog; LAD-2 long isoform [Source:UniProtKB/TrEMBL;Acc:G5ECX2]
ENSG00000226650, ENSG00000090889	KIF4A, KIF4B	klp-19	klp-19		Kinesin-like protein [Source:UniProtKB/TrEMBL;Acc:O45935]
ENSG00000116852, ENSG00000139116	KIF21B, KIF21A	klp-12	klp-12	KIF21A	Kinesin-Like Protein [Source:UniProtKB/TrEMBL;Acc:B3GWD7]
ENSG00000138709, ENSG00000155506	LARP1, LARP1B	larp-1	larp-1	LARP1	La-related protein 1 [Source:UniProtKB/Swiss-Prot;Acc:D5MCN2]
ENSG00000142945, ENSG00000141200, ENSG00000186638, ENSG00000068796	KIF24, KIF2B, KIF2A, KIF2C	klp-7	klp-7		Kinesin-like protein [Source:UniProtKB/TrEMBL;Acc:G5ED75]
ENSG00000204197, ENSG00000167702, ENSG00000140859, ENSG00000233450, ENSG00000237649	KIFC3, KIFC1, KIFC2	klp-17, klp-3, klp-16, klp-15	klp-15, klp-16	KIFC1	Kinesin-like protein [Source:UniProtKB/TrEMBL;Acc:Q23124]
ENSG00000126602	TRAP1	R151.7	R151.7
ENSG00000141551, ENSG00000180138, ENSG00000213923, ENSG00000113712	CSNK1D, CSNK1A1L, CSNK1A1, CSNK1E	kin-19, kin-20	kin-19	CSNK1D, CSNK1A1, CSNK1E	Casein kinase I isoform alpha [Source:UniProtKB/Swiss-Prot;Acc:P42168]
ENSG00000069020, ENSG00000099308, ENSG00000105613, ENSG00000086015	MAST4, MAST3, MAST1, MAST2	kin-4	kin-4	MAST1	KIN-4 protein; Protein KINase [Source:UniProtKB/TrEMBL;Acc:G5EFA4]
ENSG00000196839, ENSG00000168803	ADA, ADAL	C44B7.12, C06G3.5	C44B7.12		Adenosine deaminase-like protein [Source:UniProtKB/Swiss-Prot;Acc:Q8IG39]
ENSG00000151611	MMAA	mmaa-1	mmaa-1	MMAA	Methylmalonic aciduria type A homolog, mitochondrial [Source:UniProtKB/Swiss-Prot;Acc:Q22111]
ENSG00000143952	VPS54	vps-54	vps-54	VPS54	Vacuolar protein sorting-associated protein 54 [Source:UniProtKB/Swiss-Prot;Acc:Q22639]
ENSG00000064102	ASUN	R02D3.4	R02D3.4
ENSG00000052795, ENSG00000217128	FNIP1, FNIP2	T04C4.1	T04C4.1	FNIP1
ENSG00000178607, ENSG00000134398	ERN1, ERN2	ire-1	ire-1		Serine/threonine-protein kinase/endoribonuclease ire-1 Serine/threonine-protein kinase Endoribonuclease [Source:UniProtKB/Swiss-Prot;Acc:Q09499]
ENSG00000071205, ENSG00000159842, ENSG00000165895, ENSG00000186716, ENSG00000145819, ENSG00000079482	BCR, ARHGAP42, ARHGAP10, ABR, ARHGAP26, OPHN1	T04C9.1	T04C9.1
ENSG00000101146	RAE1	rae-1	rae-1		mRNA export factor rae-1 [Source:UniProtKB/Swiss-Prot;Acc:Q93454]
ENSG00000164961	KIAA0196	T05E7.3	T05E7.3
ENSG00000243927	MRPS6	mrps-6	mrps-6		Mitochondrial Ribosomal Protein, Small [Source:UniProtKB/TrEMBL;Acc:O61791]
ENSG00000076321	KLHL20	R12E2.1	R12E2.1
ENSG00000206557	TRIM71	lin-41	lin-41
ENSG00000174106, ENSG00000161904	LEMD3, LEMD2	lem-2	lem-2	LEMD3	LEM protein 2 [Source:UniProtKB/Swiss-Prot;Acc:Q9XTB5]
ENSG00000182979, ENSG00000057935, ENSG00000149480	MTA1, MTA2, MTA3	lin-40	lin-40	MTA1, MTA3
ENSG00000110768	GTF2H1	R02D3.3	R02D3.3
ENSG00000072803, ENSG00000166167	BTRC, FBXW11	lin-23	lin-23	FBXW11	F-box/WD repeat-containing protein lin-23 [Source:UniProtKB/Swiss-Prot;Acc:Q09990]
ENSG00000114125	RNF7	rbx-2	rbx-2		Yeast RBX (Ring finger protein) homolog [Source:UniProtKB/TrEMBL;Acc:P91404]
ENSG00000182504	CEP97	R02F11.4	R02F11.4
ENSG00000215211, ENSG00000230883		R04E5.8	R04E5.8
ENSG00000105983, ENSG00000139636	LMBR1, LMBR1L	R05D3.2	R05D3.2	LMBR1	LIMR family protein R05D3.2 [Source:UniProtKB/Swiss-Prot;Acc:P34535]
ENSG00000174405	LIG4	lig-4	lig-4	LIG4	LIGase [Source:UniProtKB/TrEMBL;Acc:Q95YE6]
ENSG00000105486	LIG1	lig-1	lig-1		DNA ligase 1 [Source:UniProtKB/Swiss-Prot;Acc:Q27474]
ENSG00000101460, ENSG00000171471, ENSG00000140941	MAP1LC3A, MAP1LC3B	lgg-2	lgg-2	MAP1LC3B
ENSG00000176894, ENSG00000247077	PGAM5, PXMP2	pgam-5	pgam-5		Serine/threonine-protein phosphatase Pgam5, mitochondrial [Source:UniProtKB/Swiss-Prot;Acc:Q09422]
ENSG00000148843	PDCD11	let-716	let-716
ENSG00000125107	CNOT1	let-711	let-711		NTL-1a [Source:UniProtKB/TrEMBL;Acc:Q20937]
ENSG00000062650	WAPL	wapl-1	wapl-1		Wings apart-like protein homolog 1 [Source:UniProtKB/Swiss-Prot;Acc:H2L0H5]
ENSG00000067900, ENSG00000134318	ROCK2, ROCK1	let-502	let-502	ROCK1	Rho-associated protein kinase let-502 [Source:UniProtKB/Swiss-Prot;Acc:P92199]
ENSG00000114346	ECT2	ect-2	ect-2		ECT2 (Mammalian Rho GEF) homolog [Source:UniProtKB/TrEMBL;Acc:Q22590]
ENSG00000113318, ENSG00000116062	MSH3, MSH6	msh-6	msh-6	MSH3	MSH (MutS Homolog) family [Source:UniProtKB/TrEMBL;Acc:Q9N3T8]
ENSG00000063601, ENSG00000269031, ENSG00000171100, ENSG00000087053	MTM1, MTMR2, MTMR1	mtm-1	mtm-1	MTM1, MTMR1	Myotubularin-related protein 1 [Source:UniProtKB/Swiss-Prot;Acc:Q9N589]
ENSG00000100410	PHF5A	phf-5	phf-5		PHF-5; PHd Finger family [Source:UniProtKB/TrEMBL;Acc:G5EBY6]
ENSG00000198682, ENSG00000138801	PAPSS1, PAPSS2	pps-1	pps-1		3'-Phosphoadenosine 5'-Phosphosulfate Synthetase [Source:UniProtKB/TrEMBL;Acc:A0A061AE05]
ENSG00000100056	DGCR14	ess-2	ess-2		ES2 similar protein 2 [Source:UniProtKB/Swiss-Prot;Acc:P34420]
ENSG00000149923	PPP4C	pph-4.1, pph-4.2	pph-4.1, pph-4.2		Serine/threonine-protein phosphatase 4 catalytic subunit 1 [Source:UniProtKB/Swiss-Prot;Acc:Q9XW79]
ENSG00000186704, ENSG00000078319, ENSG00000123965, ENSG00000198632, ENSG00000174368, ENSG00000127957, ENSG00000122512, ENSG00000188073, ENSG00000064933	PMS1, PMS2P1, DTX2P1, PMS2P5, PMS2P3, PMS2	pms-2	pms-2		PMS (Post Meiotic Segregation) family [Source:UniProtKB/TrEMBL;Acc:G5EFG5]
ENSG00000214982, ENSG00000237486, ENSG00000227345	PARG	pme-4, pme-3	pme-3
ENSG00000110917	MLEC	F44E2.10	F44E2.10
ENSG00000166851, ENSG00000145632, ENSG00000237810, ENSG00000173846	CTD-2571E19.3, PLK2, PLK3, PLK1	plk-1, plk-3, plk-2	plk-3		Serine/threonine-protein kinase plk-1 [Source:UniProtKB/Swiss-Prot;Acc:P34331]
ENSG00000161714, ENSG00000139151, ENSG00000115556, ENSG00000187091, ENSG00000248833	PLCZ1, PLCD3, PLCD4, PLCD1	plc-4	plc-4		Phosphoinositide phospholipase C [Source:UniProtKB/TrEMBL;Acc:Q21754]
ENSG00000163558, ENSG00000067606	PRKCZ, PRKCI	pkc-3	pkc-3		Protein kinase C-like 3 [Source:UniProtKB/Swiss-Prot;Acc:Q19266]
ENSG00000137337, ENSG00000157212	MDC1, PAXIP1	pis-1	pis-1		PIS (Pax-2, IA-1/6, Smad-2 interacting protein) homolog [Source:UniProtKB/TrEMBL;Acc:Q9U370]
ENSG00000140451	PIF1	pif-1	pif-1		ATP-dependent DNA helicase PIF1 [Source:UniProtKB/TrEMBL;Acc:G5EFV7]
ENSG00000174327, ENSG00000174326, ENSG00000168679, ENSG00000165449, ENSG00000163053	SLC16A11, SLC16A13, SLC16A9, SLC16A14, SLC16A4	C01B4.9, F10G7.5, M03B6.2, C49F8.2, T02G5.12, C10E2.6, pes-22, Y59A8B.21, Y19D10A.12	Y59A8B.21	SLC16A14
ENSG00000170638	TRABD	F38A5.2	F38A5.2
ENSG00000145604	SKP2	skpt-1	skpt-1		SKP2 (S phase Kinase associated Protein Two) homolog [Source:UniProtKB/TrEMBL;Acc:Q09397]
ENSG00000176473, ENSG00000168438	CDC40, WDR25	Y54G2A.12, prp-17	prp-17
ENSG00000059758, ENSG00000117266, ENSG00000102225	CDK18, CDK17, CDK16	pct-1	pct-1		Cyclin-dependent kinase 17 [Source:UniProtKB/Swiss-Prot;Acc:Q8I7M8]
ENSG00000132646	PCNA	pcn-1	pcn-1	PCNA	Proliferating cell nuclear antigen [Source:UniProtKB/Swiss-Prot;Acc:O02115]
ENSG00000042088	TDP1	F52C12.1	F52C12.1		Probable tyrosyl-DNA phosphodiesterase [Source:UniProtKB/Swiss-Prot;Acc:Q9TXV7]
ENSG00000070785	EIF2B3	ppp-1, tra-2	tra-2		Sex-determining transformer protein 2 [Source:UniProtKB/Swiss-Prot;Acc:P34709]
ENSG00000185359	HGS	hgrs-1	hgrs-1		Hepatocyte Growth factor-Regulated TK Substrate (HRS) family [Source:UniProtKB/TrEMBL;Acc:Q17796]
ENSG00000205220, ENSG00000136930	PSMB7, PSMB10	pbs-2	pbs-2		Proteasome subunit beta type [Source:UniProtKB/TrEMBL;Acc:O62102]
ENSG00000184708	EIF4ENIF1	ifet-1	ifet-1	EIF4ENIF1	Translational repressor ifet-1 [Source:UniProtKB/Swiss-Prot;Acc:Q20898]
ENSG00000177192	PUS1	pus-1	pus-1		tRNA pseudouridine synthase [Source:UniProtKB/TrEMBL;Acc:Q9XXN0]
ENSG00000179295, ENSG00000111679, ENSG00000217801	PTPN11, PTPN6, RP11-465B22.3	ptp-2	ptp-2	PTPN6	Tyrosine-protein phosphatase non-receptor type ptp-2 [Source:UniProtKB/Swiss-Prot;Acc:G5EC24]
ENSG00000157593	SLC35B2	pst-1	pst-1		Adenosine 3'-phospho 5'-phosphosulfate transporter 1 [Source:UniProtKB/Swiss-Prot;Acc:Q8MXJ9]
ENSG00000188917, ENSG00000099899	TRMT2B, TRMT2A	H24K24.4	H24K24.4
ENSG00000154611, ENSG00000101182	PSMA8, PSMA7	pas-4	pas-4		Proteasome subunit alpha type-7 [Source:UniProtKB/Swiss-Prot;Acc:Q95005]
ENSG00000161813, ENSG00000107929	LARP4B, LARP4	larp-5	larp-5	LARP4	LARP (RNA binding La related protein) homolog [Source:UniProtKB/TrEMBL;Acc:O44760]
ENSG00000162735	PEX19	prx-19	prx-19		Putative peroxisomal biogenesis factor 19 [Source:UniProtKB/Swiss-Prot;Acc:P34453]
ENSG00000134697	GNL2	ngp-1	ngp-1		Nucleolar GTP-binding protein 2 [Source:UniProtKB/TrEMBL;Acc:Q9U365]
ENSG00000065268	WDR18	pro-1	pro-1		Pre-rRNA-processing protein pro-1 [Source:UniProtKB/Swiss-Prot;Acc:Q22006]
ENSG00000111711, ENSG00000174567	GOLT1B, GOLT1A	F41C3.4	F41C3.4	GOLT1B	Probable Golgi transport protein 1 [Source:UniProtKB/Swiss-Prot;Acc:Q20263]
ENSG00000198056	PRIM1	T24C4.5, pri-1	pri-1		DNA primase [Source:UniProtKB/TrEMBL;Acc:Q9TZ34]
ENSG00000197181, ENSG00000134627, ENSG00000125207, ENSG00000184571	PIWIL2, PIWIL3, PIWIL4, PIWIL1	prg-1, prg-2	prg-1, prg-2		Piwi-like protein [Source:UniProtKB/TrEMBL;Acc:P90786]
ENSG00000164190	NIPBL	pqn-85	pqn-85		Nipped-B-like protein pqn-85 [Source:UniProtKB/Swiss-Prot;Acc:Q95XZ5]
ENSG00000173473, ENSG00000139613	SMARCC1, SMARCC2	swsn-1	swsn-1		SWI/SNF nucleosome remodeling complex component; SWI3-like protein [Source:UniProtKB/TrEMBL;Acc:G5EF87]
ENSG00000070540, ENSG00000157954	WIPI1, WIPI2	atg-18	atg-18	WIPI2	AuTophaGy (Yeast Atg homolog) [Source:UniProtKB/TrEMBL;Acc:H2KYN5]
ENSG00000243244, ENSG00000242441, ENSG00000165417, ENSG00000068781, ENSG00000140022	STON1-GTF2A1L, GTF2A1, STON1, GTF2A1L, STON2	unc-41, pqn-51	pqn-51	STON1, GTF2A1L, GTF2A1	Putative stoned B-like protein [Source:UniProtKB/Swiss-Prot;Acc:P90761]
ENSG00000108294		pbs-3	pbs-3		Proteasome subunit beta type-3 [Source:UniProtKB/Swiss-Prot;Acc:Q23237]
ENSG00000155561	NUP205	npp-3	npp-3	NUP205	Nuclear Pore complex Protein [Source:UniProtKB/TrEMBL;Acc:Q21436]
ENSG00000142655	PEX14	prx-14	prx-14		PeRoXisome assembly factor [Source:UniProtKB/TrEMBL;Acc:Q93930]
ENSG00000107951, ENSG00000149016	MTPAP, TUT1	mut-2	mut-2		MUTator [Source:UniProtKB/TrEMBL;Acc:Q8IA66]
ENSG00000135213, ENSG00000158553, ENSG00000126883, ENSG00000196313	POM121, POM121L2, NUP214	npp-14	npp-14		Nuclear pore complex protein 14 [Source:UniProtKB/Swiss-Prot;Acc:Q17602]
ENSG00000160209	PDXK	F57C9.1	F57C9.1	PDXK
ENSG00000110713, ENSG00000213024	NUP62, NUP98	npp-11, npp-10	npp-10	NUP98	Nuclear Pore complex Protein [Source:UniProtKB/TrEMBL;Acc:O01576]
ENSG00000187627, ENSG00000183054, ENSG00000015568, ENSG00000185304, ENSG00000169629, ENSG00000099901, ENSG00000153165, ENSG00000153201, ENSG00000196862	RGPD2, RGPD4, RGPD6, RANBP2, RANBP1, RGPD5, RGPD3, RGPD1, RGPD8	npp-9	npp-9	RANBP2	Nuclear Pore complex Protein [Source:UniProtKB/TrEMBL;Acc:Q21021]
ENSG00000030066	NUP160	npp-6	npp-6	NUP160	Nuclear Pore complex Protein [Source:UniProtKB/TrEMBL;Acc:Q8T8M4]
ENSG00000013561	RNF14	F56D2.5, F56D2.2	F56D2.2
ENSG00000138750	NUP54	npp-1	npp-1	NUP54	Nuclear Pore complex Protein [Source:UniProtKB/TrEMBL;Acc:Q9U3B9]
ENSG00000198646	NCOA6	nos-3	nos-3	NCOA6	NanOS related [Source:UniProtKB/TrEMBL;Acc:O18218]
ENSG00000198963, ENSG00000069667, ENSG00000143365	RORB, RORA, RORC	nhr-23	nhr-23		Nuclear hormone receptor family member nhr-23 [Source:UniProtKB/Swiss-Prot;Acc:P41828]
ENSG00000268946, ENSG00000085224	ATRX	xnp-1	xnp-1		Transcriptional regulator ATRX homolog [Source:UniProtKB/Swiss-Prot;Acc:Q9U7E0]
ENSG00000047249	ATP6V1H	vha-18, vha-15	vha-18	ATP6V1H	Probable V-type proton ATPase subunit H 1 [Source:UniProtKB/Swiss-Prot;Acc:Q20666]
ENSG00000157020	SEC13	npp-20	npp-20		Protein SEC13 homolog [Source:UniProtKB/Swiss-Prot;Acc:Q9N4A7]
ENSG00000067113, ENSG00000162407, ENSG00000141934	PLPP1, PLPP3, PLPP2	F53C3.13, T28D9.3	F53C3.13
ENSG00000148498, ENSG00000116117	PARD3B, PARD3	par-3	par-3		Partitioning defective protein 3 [Source:UniProtKB/Swiss-Prot;Acc:Q17353]
ENSG00000110171, ENSG00000109654	TRIM2, TRIM3	ncl-1, nhl-1	ncl-1	TRIM2	B-box type zinc finger protein ncl-1 [Source:UniProtKB/Swiss-Prot;Acc:P34611]
ENSG00000198604	BAZ1A	athp-2	athp-2		AT Hook plus PHD finger transcription factor [Source:UniProtKB/TrEMBL;Acc:Q9N5L9]
ENSG00000143256	PFDN2	pfd-2	pfd-2		Prefoldin subunit 2 [Source:UniProtKB/Swiss-Prot;Acc:Q9N5M2]
ENSG00000186501	TMEM222	H20J04.6	H20J04.6
ENSG00000187609	EXD3	ZK1098.3, Y57A10A.13, mut-7	mut-7
ENSG00000132182, ENSG00000198284, ENSG00000143552	NUP210P1, NUP210, NUP210L	npp-12	npp-12		Nuclear Pore complex Protein [Source:UniProtKB/TrEMBL;Acc:P91495]
ENSG00000069248	NUP133	npp-15	npp-15		Nuclear pore complex protein 15 [Source:UniProtKB/Swiss-Prot;Acc:P34343]
ENSG00000132470, ENSG00000115221, ENSG00000160255, ENSG00000259207, ENSG00000082781, ENSG00000139626, ENSG00000150093	ITGB7, ITGB6, ITGB3, ITGB5, ITGB4, ITGB1, ITGB2	pat-3	pat-3	ITGB1	Integrin beta pat-3 [Source:UniProtKB/Swiss-Prot;Acc:Q27874]
ENSG00000093000, ENSG00000238163	NUP50	npp-16	npp-16	NUP50	Nuclear Pore complex Protein [Source:UniProtKB/TrEMBL;Acc:Q9U240]
ENSG00000170734	POLH	polh-1	polh-1	POLH	DNA polymerase eta; POLH (DNA polymerase eta) homolog [Source:UniProtKB/TrEMBL;Acc:G5EFY1]
ENSG00000143106	PSMA5	pas-5	pas-5		Proteasome subunit alpha type-5 [Source:UniProtKB/Swiss-Prot;Acc:Q95008]
ENSG00000117748, ENSG00000204086	RPA4, RPA2	rpa-4, rpa-2	rpa-2		Replication Protein A homolog [Source:UniProtKB/TrEMBL;Acc:Q8I7G2]
ENSG00000080986	NDC80	ndc-80	ndc-80	NDC80	Kinetochore protein ndc-80 [Source:UniProtKB/Swiss-Prot;Acc:Q17635]
ENSG00000113722, ENSG00000165556, ENSG00000131264	CDX4, CDX2, CDX1	pal-1	pal-1		Homeobox protein pal-1 [Source:UniProtKB/Swiss-Prot;Acc:P34766]
ENSG00000100836, ENSG00000205022	PABPN1, PABPN1L	EEED8.12, pabp-2, EEED8.4	pabp-2		Putative RNA-binding protein EEED8.12 [Source:UniProtKB/Swiss-Prot;Acc:Q09301]
ENSG00000166225, ENSG00000137218	FRS3, FRS2	rog-1	rog-1	FRS2	Ras activating factor in development Of Germline [Source:UniProtKB/TrEMBL;Acc:E6N0V1]
ENSG00000124786	SLC35B3	pst-2	pst-2		Adenosine 3'-phospho 5'-phosphosulfate transporter 2 [Source:UniProtKB/Swiss-Prot;Acc:Q20787]
ENSG00000160404, ENSG00000136827, ENSG00000136816, ENSG00000186283, ENSG00000198113	TOR2A, TOR4A, TOR3A, TOR1A, TOR1B	ooc-5, tor-1, tor-2	ooc-5		Torsin-like protein [Source:UniProtKB/Swiss-Prot;Acc:Q95NU5]
ENSG00000147162	OGT	ogt-1	ogt-1		UDP-N-acetylglucosamine--peptide N-acetylglucosaminyltransferase [Source:UniProtKB/Swiss-Prot;Acc:O18158]
ENSG00000101888, ENSG00000132661	NXT1, NXT2	nxt-1	nxt-1		NTF2-related export protein [Source:UniProtKB/Swiss-Prot;Acc:Q9U757]
ENSG00000015676, ENSG00000090273	NUDC, NUDCD3	nud-1	nud-1		Aspergillus NUclear Division related; NUD-1 [Source:UniProtKB/TrEMBL;Acc:G5EE74]
ENSG00000127616, ENSG00000080503	SMARCA4, SMARCA2	C52B9.8, swsn-4	swsn-4
ENSG00000089737	DDX24	F55F8.2	F55F8.2	DDX24
ENSG00000137513, ENSG00000134440	NARS2, NARS	nars-2, nars-1	nars-1	NARS	Asparaginyl(N) Amino-acyl tRNA Synthetase [Source:UniProtKB/TrEMBL;Acc:Q95PZ8]
ENSG00000070495	JMJD6	psr-1	psr-1		Bifunctional arginine demethylase and lysyl-hydroxylase psr-1 [Source:UniProtKB/Swiss-Prot;Acc:Q9GYI4]
ENSG00000167674, ENSG00000164985, ENSG00000166503, ENSG00000112273, ENSG00000143321	HDGFL1, HDGF, PSIP1, CTB-50L17.10, RP11-382A20.3	C06A5.3	C06A5.3
ENSG00000224510, ENSG00000147669	POLR2KP2, POLR2K	rpb-12	rpb-12	POLR2K	RNA Polymerase II (B) subunit [Source:UniProtKB/TrEMBL;Acc:X5M5N4]
ENSG00000060069	CTDP1	fcp-1	fcp-1		FCP1 (Yeast TFIIF-interacting CTD phosphatase subunit) homolog [Source:UniProtKB/TrEMBL;Acc:Q95QG8]
ENSG00000153989	NUS1	F37B12.3	F37B12.3	NUS1
ENSG00000083799	CYLD	cyld-1	cyld-1	CYLD	CYLinDromatosis (Human disease gene) homolog [Source:UniProtKB/TrEMBL;Acc:Q7JMS4]
		mig-38	mig-38		Abnormal cell migration protein 38 [Source:UniProtKB/Swiss-Prot;Acc:A6ZJ71]
ENSG00000147316	MCPH1	W04A8.1	W04A8.1	MCPH1
ENSG00000119707	RBM25	W04D2.6	W04D2.6	RBM25
ENSG00000172273, ENSG00000020256, ENSG00000124092, ENSG00000102974	CTCFL, ZFP64, HINFP, CTCF	F39B2.1	F39B2.1	CTCF
ENSG00000164346	NSA2	W09C5.1	W09C5.1
ENSG00000198477, ENSG00000137871, ENSG00000169548, ENSG00000143442, ENSG00000056277	ZNF280C, ZNF280D, POGZ, ZNF280A	F37D6.2	F37D6.2	ZNF280C
ENSG00000163781	TOPBP1	mus-101	mus-101	TOPBP1
ENSG00000118322, ENSG00000145246, ENSG00000206190	ATP10D, ATP10B, ATP10A	tat-3, tat-4	tat-3		Phospholipid-transporting ATPase [Source:UniProtKB/TrEMBL;Acc:O18182]
ENSG00000198331	HYLS1	hyls-1	hyls-1
ENSG00000009844	VTA1	T23G11.7	T23G11.7	VTA1
ENSG00000066455	GOLGA5	T24B1.1	T24B1.1	GOLGA5	Golgin-84 [Source:UniProtKB/Swiss-Prot;Acc:P90970]
ENSG00000079950, ENSG00000117758	STX7, STX12	syx-7	syx-7	STX12	SYntaXin [Source:UniProtKB/TrEMBL;Acc:O62236]
ENSG00000134049	IER3IP1	W09G3.8	W09G3.8
ENSG00000103150	MLYCD	mlcd-1	mlcd-1		MaLonyl CoA Decarboxylase [Source:UniProtKB/TrEMBL;Acc:Q20048]
ENSG00000115593, ENSG00000143499, ENSG00000186532, ENSG00000185420	SMYD4, SMYD2, SMYD3, SMYD1	set-14, set-10, set-18, set-30	set-14	SMYD3	SET domain-containing protein 14 [Source:UniProtKB/Swiss-Prot;Acc:Q09415]
ENSG00000176623	RMDN1	F33H2.6	F33H2.6
ENSG00000177084	POLE	F33H2.5	F33H2.5
ENSG00000081087	OSTM1	F42A8.3	F42A8.3	OSTM1
ENSG00000140382, ENSG00000064961	HMG20A, HMG20B	hmg-20	hmg-20		HMG [Source:UniProtKB/TrEMBL;Acc:Q9XVG8]
ENSG00000037897	METTL1	W02B12.10	W02B12.10		tRNA (guanine-N(7)-)-methyltransferase [Source:UniProtKB/Swiss-Prot;Acc:Q23126]
ENSG00000166889	PATL1	patr-1	patr-1		Protein PAT1 homolog 1 [Source:UniProtKB/Swiss-Prot;Acc:Q20374]
ENSG00000017797	RALBP1	rlbp-1	rlbp-1	RALBP1	RaL Binding Protein [Source:UniProtKB/TrEMBL;Acc:E2JL05]
ENSG00000215079, ENSG00000189067, ENSG00000089486	CDIP1, LITAF	F16F9.1, F36G3.3, Y87G2A.18, Y87G2A.19, Y37D8A.8	Y87G2A.18
ENSG00000114374, ENSG00000124486, ENSG00000162402	USP24, USP9Y, USP9X	T24B8.7	T24B8.7	USP9X	Ubiquitin carboxyl-terminal hydrolase [Source:UniProtKB/TrEMBL;Acc:N1NVC2]
ENSG00000205707	LYRM5	Y42A5A.5	Y42A5A.5
ENSG00000140350, ENSG00000136938, ENSG00000143401, ENSG00000214619, ENSG00000139223, ENSG00000265346, ENSG00000184701	ANP32A, ANP32E, ANP32B, ANP32D	T19H12.2, F33H2.3	T19H12.2, F33H2.3		Acidic leucine-rich nuclear phosphoprotein 32-related protein 2 [Source:UniProtKB/Swiss-Prot;Acc:O01615]
ENSG00000126106	TMEM53	T24H10.4, C09B8.4, T10B11.6	T10B11.6
ENSG00000168589, ENSG00000125971	DYNLRB1, DYNLRB2	dyrb-1	dyrb-1		Dynein light chain roadblock [Source:UniProtKB/TrEMBL;Acc:Q22752]
ENSG00000164124	TMEM144	W06A7.4, F49C12.6, W02D3.4, T19A6.4, K07F5.12, R144.6	R144.6
ENSG00000105287, ENSG00000184304, ENSG00000115825	PRKD2, PRKD1, PRKD3	dkf-1, dkf-2	dkf-2	PRKD3	Serine/threonine-protein kinase dkf-1 [Source:UniProtKB/Swiss-Prot;Acc:Q9XUJ7]
ENSG00000184381	PLA2G6	D1037.5, W07A8.2, F47A4.5, C45B2.6, H23L24.2	W07A8.2
ENSG00000157916	RER1	rer-1	rer-1		Protein RER1 homolog [Source:UniProtKB/Swiss-Prot;Acc:P52879]
ENSG00000135587	SMPD2	T27F6.6	T27F6.6		Putative neutral sphingomyelinase [Source:UniProtKB/Swiss-Prot;Acc:O45870]
ENSG00000136874	STX17	syx-17	syx-17		SYntaXin [Source:UniProtKB/TrEMBL;Acc:O62387]
ENSG00000166822	TMEM170A	F43G9.13	F43G9.13	TMEM170A
ENSG00000159086, ENSG00000005436	GCFC2, PAXBP1	F43G9.12	F43G9.12
ENSG00000122966	CIT	W02B8.2, F59A6.5	F59A6.5
ENSG00000176853	FAM91A1	F33H2.2	F33H2.2
ENSG00000204219, ENSG00000171703, ENSG00000187735, ENSG00000176896	TCEA3, TCEA1, TCEANC, TCEA2	T24H10.1	T24H10.1	TCEA1	Putative transcription elongation factor S-II [Source:UniProtKB/Swiss-Prot;Acc:P52652]
ENSG00000129691	ASH2L	ash-2	ash-2		Set1/Ash2 histone methyltransferase complex subunit ash-2 [Source:UniProtKB/Swiss-Prot;Acc:G5EFZ3]
ENSG00000204518, ENSG00000197953, ENSG00000114771, ENSG00000188984, ENSG00000144959	AADACL2, NCEH1, AADACL4, AADAC, AADACL3	Y43F8A.3, trcs-1, F16F9.4, T09B9.1	trcs-1		TRansport of membrane to Cell Surface [Source:UniProtKB/TrEMBL;Acc:Q19839]
ENSG00000141580, ENSG00000196998	WDR45, WDR45B	epg-6	epg-6	WDR45	Ectopic P Granules [Source:UniProtKB/TrEMBL;Acc:E3CTH5]
ENSG00000159461	AMFR	hrdl-1	hrdl-1		E3 ubiquitin-protein ligase hrd-like protein 1 [Source:UniProtKB/Swiss-Prot;Acc:P90859]
ENSG00000169660	HEXDC	hex-5, hex-3, hex-4, hex-2	hex-4		HEXosaminidase; Hexosaminidase [Source:UniProtKB/TrEMBL;Acc:G5EEC8]
ENSG00000138621	PPCDC	F25H9.6	F25H9.6
ENSG00000145414	NAF1	F25H8.2	F25H8.2	NAF1
ENSG00000092853	CLSPN	F25H5.5	F25H5.5
ENSG00000178222	RNF212	F55A12.10, Y39B6A.16	F55A12.10, Y39B6A.16
ENSG00000113163	COL4A3BP	F25H2.6	F25H2.6
ENSG00000131148, ENSG00000100908	EMC8, EMC9	F25H2.4	F25H2.4
ENSG00000188342	GTF2F2	Y39B6A.36	Y39B6A.36		General transcription factor IIF subunit 2 [Source:UniProtKB/TrEMBL;Acc:Q8MYM8]
ENSG00000039650	PNKP	F21D5.5	F21D5.5
ENSG00000047056	WDR37	C05D2.10	C05D2.10	WDR37
ENSG00000174928	C3orf33	F32A11.1, W09H1.3	F32A11.1	C3orf33
ENSG00000161939, ENSG00000258315	RNASEK-C17orf49, C17orf49	Y43F8C.6	Y43F8C.6
ENSG00000011426	ANLN	ani-1, ani-3, ani-2	ani-1	ANLN	Anillin-like protein 1 [Source:UniProtKB/Swiss-Prot;Acc:Q9XTT4]
ENSG00000168137, ENSG00000005483	SETD5, KMT2E	Y73B3A.1, set-9, set-26, set-24	Y73B3A.1, set-9
ENSG00000224737, ENSG00000227561, ENSG00000171634, ENSG00000099954, ENSG00000230374	CECR2, BPTF	nurf-1	nurf-1	BPTF	Nucleosome-remodeling factor subunit NURF301-like [Source:UniProtKB/Swiss-Prot;Acc:Q6BER5]
ENSG00000213064, ENSG00000198818	SFT2D1, SFT2D2	F27D4.7	F27D4.7	SFT2D1	Vesicle transport protein [Source:UniProtKB/TrEMBL;Acc:Q7YTP0]
ENSG00000170089, ENSG00000051596	THOC3, RP11-423H2.1	thoc-3	thoc-3	THOC3	THO Complex (Transcription factor/nuclear export) subunit [Source:UniProtKB/TrEMBL;Acc:P91867]
ENSG00000177096	FAM109B	Y37D8A.25	Y37D8A.25
ENSG00000177752, ENSG00000145817	YIPF5, YIPF7	F32D8.14	F32D8.14	YIPF5
ENSG00000089693, ENSG00000178053	MLF2, MLF1	Y17G7B.17	Y17G7B.17
ENSG00000054611, ENSG00000065491	TBC1D22A, TBC1D22B	tbc-3	tbc-3		TBC (Tre-2/Bub2/Cdc16) domain family [Source:UniProtKB/TrEMBL;Acc:Q7JL36]
ENSG00000165630	PRPF18	F32B6.3	F32B6.3	PRPF18
ENSG00000188167	TMPPE	F40B5.2, T23G7.2	T23G7.2		Putative metallophosphoesterase F40B5.2 [Source:UniProtKB/Swiss-Prot;Acc:Q09320]
ENSG00000123643, ENSG00000186335, ENSG00000180773, ENSG00000186334	SLC36A1, SLC36A4, SLC36A2, SLC36A3	Y43F4B.7, T27A1.5	Y43F4B.7
ENSG00000146476	ARMT1	F31D4.2	F31D4.2
ENSG00000105216, ENSG00000262860, ENSG00000149657	LSM14A, LSM14B	car-1	car-1	LSM14B	Cytokinesis, Apoptosis, RNA-associated [Source:UniProtKB/TrEMBL;Acc:Q9XW17]
ENSG00000116954, ENSG00000025039	RRAGC, RRAGD	ragc-1	ragc-1		RAs-related GTP binding protein C homolog [Source:UniProtKB/TrEMBL;Acc:A0A061ACG4]
ENSG00000165794, ENSG00000141873, ENSG00000143570	SLC39A1, SLC39A3, SLC39A2	F30B5.7, C06G8.3, F55F8.9, F31C3.4, Y54G9A.4	F31C3.4, F55F8.9
ENSG00000122390, ENSG00000121579	NAA60, NAA50	F40F4.7, F54E7.9, F30F8.10	F40F4.7, F30F8.10
ENSG00000211456	SACM1L	sac-1	sac-1		SAC1 PIP phosphatase (Yeast Suppressor of ACtin) homolog [Source:UniProtKB/TrEMBL;Acc:Q93641]
ENSG00000068745, ENSG00000161896, ENSG00000176095	IP6K2, IP6K3, IP6K1	Y22D7AR.6, T20F7.3, F30A10.3	F30A10.3		Kinase [Source:UniProtKB/TrEMBL;Acc:Q9BKX8]
ENSG00000064651, ENSG00000074803, ENSG00000070915	SLC12A1, SLC12A2, SLC12A3	B0303.11, nkcc-1	nkcc-1		Uncharacterized amino-acid permease B0303.11 [Source:UniProtKB/Swiss-Prot;Acc:P34261]
ENSG00000174177	CTU2	tut-2	tut-2		Cytoplasmic tRNA 2-thiolation protein 2 [Source:UniProtKB/Swiss-Prot;Acc:Q19906]
ENSG00000164327	RICTOR	rict-1	rict-1
ENSG00000179085	DPM3	dpm-3	dpm-3		Probable dolichol-phosphate mannosyltransferase subunit 3 [Source:UniProtKB/Swiss-Prot;Acc:Q9XVV5]
ENSG00000106077, ENSG00000262947	ABHD11	F32B4.6, R05D7.4	R05D7.4
ENSG00000143751	SDE2	F53F4.14	F53F4.14
ENSG00000166902	MRPL16	mrpl-16	mrpl-16		Mitochondrial Ribosomal Protein, Large [Source:UniProtKB/TrEMBL;Acc:Q22140]
ENSG00000125733, ENSG00000137942, ENSG00000187239	FNBP1L, TRIP10, FNBP1	toca-1, toca-2	toca-2	FNBP1	Transducer of Cdc42-dependent actin assembly protein 1 homolog [Source:UniProtKB/Swiss-Prot;Acc:Q19253]
ENSG00000029364	SLC39A9	T01D3.5	T01D3.5	SLC39A9
ENSG00000101194	SLC17A9	vnut-1	vnut-1		Vesicular NUcleotide Transporte [Source:UniProtKB/TrEMBL;Acc:O45678]
ENSG00000119720	NRDE2	nrde-2	nrde-2		Nuclear RNAi defective-2 protein [Source:UniProtKB/Swiss-Prot;Acc:G5EG51]
ENSG00000125149	C16orf70	T01G9.2	T01G9.2	C16orf70	UPF0183 protein T01G9.2 [Source:UniProtKB/Swiss-Prot;Acc:P34692]
ENSG00000205356	TECPR1	T01H3.2	T01H3.2
ENSG00000138768	USO1	uso-1	uso-1		USO1 (Yeast transport protein) homolog [Source:UniProtKB/TrEMBL;Acc:G5EGG0]
ENSG00000162408	NOL9	nol-9	nol-9		Polynucleotide 5'-hydroxyl-kinase nol-9 [Source:UniProtKB/Swiss-Prot;Acc:Q9U3B6]
ENSG00000197586, ENSG00000187097	ENTPD5, ENTPD6	uda-1	uda-1	ENTPD5	Nucleoside-diphosphatase uda-1 [Source:UniProtKB/Swiss-Prot;Acc:Q9XU84]
ENSG00000151229, ENSG00000160326, ENSG00000136856	SLC2A6, SLC2A8, SLC2A13	hmit-1.2, K08H10.6, hmit-1.3, K08F9.1, Y61A9LA.1, C35A11.4, hmit-1.1, Y37A1A.3	Y61A9LA.1	SLC2A13	H(+) MyoInositol coTransporter [Source:UniProtKB/TrEMBL;Acc:Q9XXQ9]
ENSG00000127586	CHTF18	K08F4.1	K08F4.1
ENSG00000220474, ENSG00000182327, ENSG00000224051	CPTP, GLTPD2	K08E4.2, tag-296, F49D11.10	tag-296
ENSG00000164440, ENSG00000131002, ENSG00000084652, ENSG00000086712	TXLNB, TXLNA, TXLNGY, TXLNG	T22C1.6	T22C1.6
ENSG00000144233, ENSG00000101935	AMMECR1L, AMMECR1	R166.3	R166.3	AMMECR1L
ENSG00000159753, ENSG00000186648, ENSG00000079691	LRRC16A, LRRC16B, RLTPR	crml-1	crml-1		CARMIL (Capping, ARp2/3, Myosin I Linker protein) homolog [Source:UniProtKB/TrEMBL;Acc:Q21301]
ENSG00000226400, ENSG00000090372, ENSG00000196792, ENSG00000115808	STRN4, STRN, CTD-2269E23.2, STRN3	cash-1	cash-1	STRN4, STRN3	CKA And Striatin Homolog [Source:UniProtKB/TrEMBL;Acc:G5EE12]
ENSG00000101361, ENSG00000235796	NOP56	K07C5.4	K07C5.4		Uncharacterized NOP5 family protein K07C5.4 [Source:UniProtKB/Swiss-Prot;Acc:Q21276]
ENSG00000005156	LIG3	K07C5.3	K07C5.3
ENSG00000143476	DTL	cdt-2	cdt-2		CDT (S. pombe CDC10 Dependent Transcript) homolog [Source:UniProtKB/TrEMBL;Acc:Q22059]
ENSG00000131747, ENSG00000077097	TOP2A, TOP2B	R05D3.12, top-2, cin-4	top-2	TOP2A	Putative DNA topoisomerase 2, mitochondrial [Source:UniProtKB/Swiss-Prot;Acc:P34534]
ENSG00000107669	ATE1	K07A1.9	K07A1.9
ENSG00000213341, ENSG00000143466, ENSG00000183735, ENSG00000104365	TBK1, IKBKB, CHUK	Y39G8B.5, ikke-1	ikke-1	TBK1, CHUK
ENSG00000102144, ENSG00000170950, ENSG00000269666	PGK1, PGK2	pgk-1	pgk-1		Probable phosphoglycerate kinase [Source:UniProtKB/Swiss-Prot;Acc:P91427]
ENSG00000160695	VPS11	vps-11	vps-11		Vacuolar protein sorting-associated protein 11 homolog [Source:UniProtKB/Swiss-Prot;Acc:Q09600]
ENSG00000162688	AGL	agl-1	agl-1		AGL (Amylo-1,6-GLucosidase, 4-alpha-glucanotransferase) glycogen debranching enzyme [Source:UniProtKB/TrEMBL;Acc:O62334]
ENSG00000109452, ENSG00000040933	INPP4A, INPP4B	R01H10.7	R01H10.7		Inositol polyphosphate-4-phosphatase [Source:UniProtKB/TrEMBL;Acc:Q8MUM1]
ENSG00000181035, ENSG00000122912	SLC25A42, SLC25A16	F43G9.3	F43G9.3
ENSG00000166579, ENSG00000072864	NDEL1, NDE1	nud-2	nud-2		Aspergillus NUclear Division related [Source:UniProtKB/TrEMBL;Acc:O45717]
ENSG00000107036	RIC1	R06F6.8	R06F6.8		Guanine nucleotide exchange factor subunit R06F6.8 [Source:UniProtKB/Swiss-Prot;Acc:Q09417]
ENSG00000197121	PGAP1	T19B10.8	T19B10.8	PGAP1
ENSG00000141002	TCF25	K07A12.1	K07A12.1	TCF25
ENSG00000032444, ENSG00000130653	PNPLA6, PNPLA7	M110.7, ZK370.4	ZK370.4		Uncharacterized NTE family protein M110.7 [Source:UniProtKB/Swiss-Prot;Acc:Q21534]
ENSG00000139990	DCAF5	R11D1.1	R11D1.1
ENSG00000100138	SNU13	M28.5	M28.5		NHP2-like protein 1 homolog [Source:UniProtKB/Swiss-Prot;Acc:Q21568]
ENSG00000166140	ZFYVE19	R11D1.10	R11D1.10
ENSG00000167986	DDB1	ddb-1	ddb-1		DNA damage-binding protein 1 [Source:UniProtKB/Swiss-Prot;Acc:Q21554]
ENSG00000132824, ENSG00000111897, ENSG00000184716, ENSG00000168528, ENSG00000164300	SERINC3, SERINC2, SERINC5, SERINC4, SERINC1	Y57E12AL.1, R11H6.2	Y57E12AL.1, R11H6.2	SERINC1
ENSG00000197548	ATG7	atg-7	atg-7		AuTophaGy (Yeast Atg homolog) [Source:UniProtKB/TrEMBL;Acc:G5EBK4]
ENSG00000107185	RGP1	M01F1.9	M01F1.9
ENSG00000091622, ENSG00000090975, ENSG00000180957, ENSG00000110697, ENSG00000174238	PITPNM3, PITPNB, PITPNM2, PITPNA, PITPNM1	pitp-1, Y54F10AR.1	Y54F10AR.1	PITPNB	PhosphatidylInositol Transfer Protein family [Source:UniProtKB/TrEMBL;Acc:G5EED9]
ENSG00000106771	TMEM245	M01F1.4	M01F1.4
ENSG00000105793, ENSG00000101181	GTPBP10, MTG2	C26E6.12, M01E5.2	C26E6.12
ENSG00000142892	PIGK	hpo-4	hpo-4		Putative GPI-anchor transamidase [Source:UniProtKB/Swiss-Prot;Acc:P49048]
ENSG00000120688	WBP4	F56G4.4	F56G4.4
ENSG00000101464	PIGU	T22C1.3	T22C1.3
ENSG00000197969, ENSG00000129003	VPS13A, VPS13C	T08G11.1	T08G11.1
ENSG00000187555	USP7	math-33	math-33		Ubiquitin carboxyl-terminal hydrolase 7 [Source:UniProtKB/Swiss-Prot;Acc:Q7JKC3]
ENSG00000204310, ENSG00000226467, ENSG00000169692, ENSG00000206324, ENSG00000235758, ENSG00000227642, ENSG00000236873, ENSG00000228892, ENSG00000206255	AGPAT2, AGPAT1	acl-2, acl-1	acl-2		Putative 1-acyl-sn-glycerol-3-phosphate acyltransferase acl-2 [Source:UniProtKB/Swiss-Prot;Acc:Q22267]
ENSG00000157800, ENSG00000134955, ENSG00000160190	SLC37A1, SLC37A3, SLC37A2	T11G6.3, T11G6.2, T10C6.6, T11G6.4	T10C6.6	SLC37A3
ENSG00000167548, ENSG00000055609	KMT2C, KMT2D	set-16	set-16		Histone-lysine N-methyltransferase [Source:UniProtKB/TrEMBL;Acc:G5EGI1]
ENSG00000204195, ENSG00000166391, ENSG00000124003, ENSG00000205267, ENSG00000106384, ENSG00000062282, ENSG00000184210	MOGAT2, DGAT2L7P, MOGAT3, DGAT2L6, AWAT1, MOGAT1, DGAT2	dgtr-1, K07B1.4, F59A1.10, Y53G8B.2	dgtr-1, K07B1.4		DGAT (Acyl-CoA:DiacylGlycerol AcylTransferase) Related [Source:UniProtKB/TrEMBL;Acc:Q23067]
ENSG00000112893, ENSG00000196547	MAN2A1, MAN2A2	aman-2, aman-3	aman-2		Alpha-mannosidase [Source:UniProtKB/TrEMBL;Acc:Q2PJ74]
ENSG00000168924, ENSG00000165046	LETM2, LETM1	letm-1	letm-1		LETM1 (Leucine zipper, EF-hand, TransMembrane mitochondrial protein) homolog [Source:UniProtKB/TrEMBL;Acc:Q9XVM0]
ENSG00000204256, ENSG00000235307, ENSG00000164366, ENSG00000137948, ENSG00000141867, ENSG00000234704, ENSG00000234507, ENSG00000230678, ENSG00000169925, ENSG00000215077	CCDC127, BRD3, BRD2, BRDT, BRD4	bet-2, F59F5.7, bet-1	bet-1	BRD3	BET (Two bromodomains) family protein [Source:UniProtKB/TrEMBL;Acc:Q20948]
ENSG00000123297	TSFM	tsfm-1	tsfm-1		Elongation factor Ts, mitochondrial [Source:UniProtKB/Swiss-Prot;Acc:Q20819]
ENSG00000170473	PYM1	T20G5.9	T20G5.9
ENSG00000119820	YIPF4	Y60A3A.19, T08D2.6	Y60A3A.19	YIPF4
ENSG00000148154	UGCG	cgt-3, cgt-2, cgt-1	cgt-3		Ceramide glucosyltransferase 3 [Source:UniProtKB/Swiss-Prot;Acc:Q21054]
ENSG00000088930, ENSG00000114127	XRN1, XRN2	xrn-2, xrn-1	xrn-1	XRN1	5'-3' exoribonuclease 2 homolog [Source:UniProtKB/Swiss-Prot;Acc:Q9U299]
ENSG00000116830, ENSG00000071794	TTF2, HLTF	F59A7.8, Y113G7B.14, F54E12.2, T23H2.3	F54E12.2, T23H2.3
ENSG00000105197	TIMM50	scpl-4	scpl-4		Mitochondrial import inner membrane translocase subunit TIM50 [Source:UniProtKB/Swiss-Prot;Acc:Q22647]
ENSG00000106615, ENSG00000167550	RHEBL1, RHEB	rheb-1	rheb-1	RHEB	GTP-binding protein Rheb homolog 1 [Source:UniProtKB/Swiss-Prot;Acc:P34443]
ENSG00000144048	DUSP11	pir-1, F54C8.4	pir-1	DUSP11	Phosphatase Interacting with RNA/RNP [Source:UniProtKB/TrEMBL;Acc:Q22707]
ENSG00000107672	NSMCE4A	H21P03.2	H21P03.2
ENSG00000166887	VPS39	vps-39	vps-39		Related to yeast Vacuolar Protein Sorting factor [Source:UniProtKB/TrEMBL;Acc:Q9XUQ4]
ENSG00000229048, ENSG00000128951	DUT, DUTP1	dut-1	dut-1		DeoxyUTPase; Deoxyuridinetriphosphatase [Source:UniProtKB/TrEMBL;Acc:G5EET2]
ENSG00000001167	NFYA	nfya-1, nfya-2	nfya-2		Nuclear transcription Factor Y, A (Alpha) subunit [Source:UniProtKB/TrEMBL;Acc:G5EEG1]
ENSG00000172992	DCAKD	T05G5.5	T05G5.5		Dephospho-CoA kinase 1 [Source:UniProtKB/TrEMBL;Acc:E5QCF6]
ENSG00000141252	VPS53	vps-53	vps-53		Vacuolar protein sorting-associated protein 53 homolog [Source:UniProtKB/Swiss-Prot;Acc:P34561]
ENSG00000138138	ATAD1	mspn-1	mspn-1	ATAD1	Mitochondrial sorting homolog [Source:UniProtKB/Swiss-Prot;Acc:P54815]
ENSG00000185189, ENSG00000115216	NRBP2, NRBP1	hpo-11	hpo-11
ENSG00000165775, ENSG00000182814, ENSG00000069509	FUNDC2, FUNDC1, FUNDC2P2	T06D8.7	T06D8.7	FUNDC1
ENSG00000160949	TONSL	K02B12.5	K02B12.5
ENSG00000138073	PREB	sec-12	sec-12		Yeast SEC homolog [Source:UniProtKB/TrEMBL;Acc:Q21115]
ENSG00000154813	DPH3	dph-3	dph-3	DPH3	DPH3 homolog [Source:UniProtKB/Swiss-Prot;Acc:Q21102]
ENSG00000105058	FAM32A	K01G5.8	K01G5.8
ENSG00000114491	UMPS	R12E2.11, umps-1	R12E2.11		Orotate phosphoribosyltransferase [Source:UniProtKB/Swiss-Prot;Acc:O61790]
ENSG00000164933	SLC25A32	K01C8.7	K01C8.7
ENSG00000180098, ENSG00000137434	TRNAU1AP, C6orf52	T07F10.3	T07F10.3
ENSG00000056050	C4orf27	JC8.7	JC8.7
ENSG00000100150	DEPDC5	T08A11.1	T08A11.1	DEPDC5
ENSG00000172269	DPAGT1	Y60A3A.14, Y60A3A.8, D1005.2, T08D2.2	Y60A3A.8
ENSG00000087111	PIGS	hpo-5	hpo-5
ENSG00000182107, ENSG00000235156, ENSG00000112697	TMEM30B, TMEM30C, TMEM30A	F20C5.4, chat-1	chat-1	TMEM30A
ENSG00000198554	WDHD1	F17C11.10	F17C11.10	WDHD1
ENSG00000124201	ZNFX1	ZK1067.2	ZK1067.2
ENSG00000165280	VCP	cdc-48.1, cdc-48.2	cdc-48.2		Transitional endoplasmic reticulum ATPase homolog 1 [Source:UniProtKB/Swiss-Prot;Acc:P54811]
ENSG00000135945	REV1	rev-1	rev-1	REV1	DNA repair protein REV1 [Source:UniProtKB/TrEMBL;Acc:Q09615]
ENSG00000196943	NOP9	ZK792.5	ZK792.5
ENSG00000168738, ENSG00000154864, ENSG00000103335, ENSG00000175388	PIEZO2, PIEZO1	T20D3.11, C10C5.1	C10C5.1
ENSG00000132780	NASP	nasp-2, nasp-1	nasp-2		NASP (Human Nuclear Autoantigenic Sperm Protein) homolog [Source:UniProtKB/TrEMBL;Acc:O17687]
ENSG00000132768	DPH2	dph-2	dph-2		2-(3-amino-3-carboxypropyl)histidine synthase subunit 2 [Source:UniProtKB/Swiss-Prot;Acc:Q09454]
ENSG00000164008	C1orf50	C08B11.9	C08B11.9
ENSG00000189079	ARID2	swsn-7	swsn-7	ARID2	SWI/SNF nucleosome remodeling complex component [Source:UniProtKB/Swiss-Prot;Acc:Q09441]
ENSG00000183155	RABIF	ZK970.8, mdt-9	mdt-9
ENSG00000220023, ENSG00000225566, ENSG00000109536, ENSG00000149531	FRG1BP, FRG1	frg-1	frg-1		Protein FRG1 homolog [Source:UniProtKB/Swiss-Prot;Acc:O18282]
ENSG00000084090	STARD7	C06H2.2	C06H2.2
ENSG00000111358	GTF2H3	ZK1128.4	ZK1128.4
ENSG00000172775	FAM192A	C25A1.1	C25A1.1
ENSG00000235254, ENSG00000155984	TMEM185AP1	Y116A8C.9	Y116A8C.9
ENSG00000117616, ENSG00000163714, ENSG00000167978, ENSG00000159140	U2SURP, SRRM2, RSRP1, SON	C04G2.8, rsr-2, C10G11.9, C07H6.4, D1037.1, T27A3.4	C07H6.4	SRRM2, SON	SR protein related [Source:UniProtKB/TrEMBL;Acc:Q9U213]
ENSG00000111237	VPS29	vps-29	vps-29	VPS29	Vacuolar protein sorting-associated protein 29 [Source:UniProtKB/TrEMBL;Acc:Q9XVX5]
ENSG00000145041	VPRBP	dcaf-1	dcaf-1	VPRBP	DDB1- and CUL4-associated factor homolog 1 [Source:UniProtKB/Swiss-Prot;Acc:Q21106]
ENSG00000177602	GSG2	Y18H1A.10, Y40A1A.1, C01H6.9, F22H10.5	C01H6.9
ENSG00000162613, ENSG00000088247, ENSG00000107164	FUBP1, KHSRP, FUBP3	ZK418.9, C12D8.1, M01A10.1, C36E6.1	ZK418.9, C12D8.1	KHSRP
ENSG00000112640, ENSG00000078304, ENSG00000154001, ENSG00000068971, ENSG00000066027	PPP2R5D, PPP2R5B, PPP2R5C, PPP2R5A, PPP2R5E	pptr-1, pptr-2	pptr-1	PPP2R5C, PPP2R5A	Serine/threonine-protein phosphatase 2A regulatory subunit pptr-1 [Source:UniProtKB/Swiss-Prot;Acc:O18178]
ENSG00000173209, ENSG00000100591	AHSA2, AHSA1	C01G10.8	C01G10.8
ENSG00000129187	DCTD	ZK643.2	ZK643.2		Probable deoxycytidylate deaminase [Source:UniProtKB/Swiss-Prot;Acc:P30648]
ENSG00000140307	GTF2A2	B0336.13, Y111B2A.13	B0336.13		Transcription initiation factor IIA small chain homolog [Source:UniProtKB/Swiss-Prot;Acc:Q9BIB4]
ENSG00000112796, ENSG00000001561, ENSG00000197594, ENSG00000136960, ENSG00000182156, ENSG00000154269, ENSG00000164303	ENPP1, ENPP7, ENPP6, ENPP4, ENPP3, ENPP2, ENPP5	T03G6.3, C27A7.3, C27A7.1, F13H10.5, C01B10.9	C01B10.9
ENSG00000137992	DBT	ZK669.4	ZK669.4
ENSG00000163029	SMC6	smc-6, C23H4.6	smc-6	SMC6	Structural maintenance of chromosomes protein 6 homolog smc-6 [Source:UniProtKB/Swiss-Prot;Acc:G5EG17]
ENSG00000154556, ENSG00000147010, ENSG00000198087, ENSG00000120896, ENSG00000095637, ENSG00000214193	SH3D21, CD2AP, SORBS2, SORBS1, SH3KBP1, SORBS3	Y44E3A.4, sorb-1	Y44E3A.4	CD2AP, SORBS2, SORBS1
ENSG00000092094, ENSG00000128694	OSGEPL1, OSGEP	C01G10.10, Y71H2AM.1	Y71H2AM.1	OSGEPL1	Probable tRNA N6-adenosine threonylcarbamoyltransferase, mitochondrial [Source:UniProtKB/Swiss-Prot;Acc:Q93170]
ENSG00000125246	CLYBL	C01G10.7	C01G10.7
ENSG00000010256, ENSG00000105819	UQCRC1, PMPCB	ucr-1, mppb-1	mppb-1	PMPCB	Cytochrome b-c1 complex subunit 1, mitochondrial [Source:UniProtKB/Swiss-Prot;Acc:P98080]
ENSG00000126653	NSRP1	ccdc-55	ccdc-55		Nuclear speckle splicing regulatory protein 1 homolog [Source:UniProtKB/Swiss-Prot;Acc:Q09252]
ENSG00000137522, ENSG00000145428	RNF175, RNF121	rnf-121	rnf-121		RING finger protein 121 [Source:RefSeq peptide;Acc:NP_497832]
ENSG00000169895	SYAP1	C16C2.4	C16C2.4
ENSG00000123213, ENSG00000172009	NLN, THOP1	ZK550.3	ZK550.3
ENSG00000198855	FICD	fic-1	fic-1		Adenosine monophosphate-protein transferase FICD homolog [Source:UniProtKB/Swiss-Prot;Acc:Q23544]
ENSG00000152520	PAN3	panl-3	panl-3		PAB-dependent poly(A)-specific ribonuclease subunit PAN3 [Source:UniProtKB/Swiss-Prot;Acc:P34653]
ENSG00000033030	ZCCHC8	ZK632.11, Y34D9A.7	ZK632.11	ZCCHC8
ENSG00000129636	ITFG1	tag-256	tag-256	ITFG1
ENSG00000196511	TPK1	tpk-1	tpk-1		Thiamin pyrophosphokinase 1 [Source:UniProtKB/Swiss-Prot;Acc:P30636]
ENSG00000154839	SKA1	ska-1	ska-1		Spindle and kinetochore-associated protein 1 [Source:UniProtKB/Swiss-Prot;Acc:Q9XWS0]
ENSG00000112984, ENSG00000137807, ENSG00000138182	KIF20A, KIF23, KIF20B	zen-4	zen-4	KIF20B	Kinesin-like protein [Source:UniProtKB/TrEMBL;Acc:G5EG83]
ENSG00000081721	DUSP12	C24F3.2	C24F3.2
ENSG00000080603, ENSG00000183495, ENSG00000185684	SRCAP, EP400, EP400NL	ssl-1	ssl-1	SRCAP	Helicase ssl-1 [Source:UniProtKB/Swiss-Prot;Acc:Q9NEL2]
ENSG00000118454	ANKRD13C	C01F1.6	C01F1.6
ENSG00000198690	FAN1	fan-1	fan-1		Fanconi-associated nuclease 1 homolog [Source:UniProtKB/Swiss-Prot;Acc:P90740]
ENSG00000168175	MAPK1IP1L	C02B10.5	C02B10.5
ENSG00000103549, ENSG00000155827	RNF20, RNF40	rfp-1	rfp-1		E3 ubiquitin-protein ligase bre-1 [Source:UniProtKB/Swiss-Prot;Acc:P34537]
ENSG00000134709, ENSG00000095066, ENSG00000168172	HOOK3, HOOK1, HOOK2	zyg-12	zyg-12		Zygote defective protein 12 [Source:UniProtKB/Swiss-Prot;Acc:Q23529]
ENSG00000203995, ENSG00000162378	ZYG11B, ZYG11A	zyg-11	zyg-11		Early embryogenesis protein zyg-11 [Source:UniProtKB/Swiss-Prot;Acc:P21541]
ENSG00000175216	CKAP5	zyg-9, T08D2.8	zyg-9	CKAP5	Zygote defective protein 9 [Source:UniProtKB/Swiss-Prot;Acc:G5EEM5]
ENSG00000169490	TM2D2	C02F5.13	C02F5.13		TM2 domain-containing protein C02F5.13 [Source:UniProtKB/Swiss-Prot;Acc:P61228]
ENSG00000215277	RNF212B	zhp-3, D1081.9	zhp-3, D1081.9		Zip (Yeast meiotic zipper) Homologous Protein [Source:UniProtKB/TrEMBL;Acc:C6KRL6]
ENSG00000101901	ALG13	hpo-17	hpo-17
ENSG00000136936	XPA	xpa-1	xpa-1		XPA (Xeroderma pigmentosum comp grp A) related [Source:UniProtKB/TrEMBL;Acc:Q21302]
ENSG00000230462, ENSG00000167433, ENSG00000225485, ENSG00000214627, ENSG00000107863	ARHGAP21	pac-1	pac-1		GTPase-activating protein pac-1 [Source:UniProtKB/Swiss-Prot;Acc:P34288]
ENSG00000139719, ENSG00000184056	VPS33A, VPS33B	vps-33.1, vps-33.2	vps-33.1, vps-33.2		Vacuolar protein sorting-associated protein 33A [Source:UniProtKB/Swiss-Prot;Acc:P34260]
ENSG00000205544	TMEM256	Y106G6H.8	Y106G6H.8
ENSG00000169230	PRELID1	B0334.4	B0334.4
ENSG00000164244	PRRC1	C04G6.4	C04G6.4	PRRC1
ENSG00000112290, ENSG00000132970, ENSG00000158195	WASF3, WASF2, WASF1	wve-1	wve-1	WASF3	WAVE (Actin cytoskeleton modulator) homolog [Source:UniProtKB/TrEMBL;Acc:F5GUF0]
ENSG00000106299, ENSG00000015285	WAS, WASL	wsp-1	wsp-1	WASL	WASP (Actin cytoskeleton modulator) homolog [Source:UniProtKB/TrEMBL;Acc:Q8MQE6]
ENSG00000125651	GTF2F1	C01F1.1	C01F1.1
ENSG00000136504, ENSG00000172977, ENSG00000103510, ENSG00000156650, ENSG00000083168	KAT5, KAT6B, KAT8, KAT7, KAT6A	mys-1, mys-2, lsy-12, mys-4	mys-1, mys-2, lsy-12, mys-4		Histone acetyltransferase Tip60 homolog [Source:UniProtKB/Swiss-Prot;Acc:Q9TYU5]
ENSG00000137824, ENSG00000115841	RMDN3, RMDN2	rmd-6, rmd-2, C16C8.18, rmd-5, rmd-3, rmd-1, rmd-4	rmd-1		Regulator of Microtubule Dynamics [Source:UniProtKB/TrEMBL;Acc:Q966G0]
ENSG00000100731, ENSG00000197136, ENSG00000135749, ENSG00000126773	PCNX, PCNXL4, PCNXL2, PCNXL3	B0511.12	B0511.12	PCNX
ENSG00000143315	PIGM	B0491.1	B0491.1	PIGM
ENSG00000146842	TMEM209	B0464.6	B0464.6	TMEM209
ENSG00000174547	MRPL11	mrpl-11	mrpl-11		Probable 39S ribosomal protein L11, mitochondrial [Source:UniProtKB/Swiss-Prot;Acc:P34264]
ENSG00000137207	YIPF3	Y53C12A.3	Y53C12A.3
ENSG00000152219	ARL14EP	B0336.5	B0336.5
ENSG00000164080	RAD54L2	rad-26	rad-26
ENSG00000198917	C9orf114	B0361.6	B0361.6		Putative methyltransferase B0361.6 [Source:UniProtKB/Swiss-Prot;Acc:Q10950]
ENSG00000058804, ENSG00000163354	NDC1, DCST2	npp-22, spe-42	npp-22		Nucleoporin ndc-1 [Source:UniProtKB/Swiss-Prot;Acc:Q8I4N3]
ENSG00000075856	SART3	B0035.12	B0035.12
ENSG00000149823	VPS51	vps-51	vps-51		Vacuolar protein sorting-associated protein 51 homolog [Source:UniProtKB/Swiss-Prot;Acc:O01839]
ENSG00000101132	PFDN4	pfd-4	pfd-4	PFDN4	Probable prefoldin subunit 4 [Source:UniProtKB/Swiss-Prot;Acc:Q17435]
ENSG00000196505, ENSG00000138496, ENSG00000172264, ENSG00000133315	PARP9, MACROD1, MACROD2, GDAP2	B0035.3	B0035.3
ENSG00000084463, ENSG00000010244, ENSG00000188863	WBP11, ZNF207	B0035.1, F33H1.3	B0035.1	WBP11
ENSG00000091127, ENSG00000129317	PUS7L, PUS7	B0024.11	B0024.11		Putative pseudouridine synthase B0024.11 [Source:UniProtKB/Swiss-Prot;Acc:Q17426]
ENSG00000006282	SPATA20	B0495.5	B0495.5
ENSG00000112249, ENSG00000144028	ASCC3, SNRNP200	snrp-200, Y54E2A.4	snrp-200, Y54E2A.4	ASCC3	Putative U5 small nuclear ribonucleoprotein 200 kDa helicase [Source:UniProtKB/Swiss-Prot;Acc:Q9U2G0]
ENSG00000145912	NHP2	Y48A6B.3	Y48A6B.3		Putative H/ACA ribonucleoprotein complex subunit 2-like protein [Source:UniProtKB/Swiss-Prot;Acc:Q9XXD4]
ENSG00000143921, ENSG00000118777, ENSG00000172350, ENSG00000160179	ABCG1, ABCG8, ABCG2, ABCG4	wht-5, wht-8, wht-3, wht-4, wht-7, wht-2, wht-6, wht-1	wht-7, wht-2		WHiTe (Drosophila) related ABC transporter [Source:UniProtKB/TrEMBL;Acc:Q19585]
ENSG00000124370	MCEE	mce-1	mce-1	MCEE	Methylmalonyl-CoA Epimerase; Mitochondrial methylmalonyl-CoA epimerase [Source:UniProtKB/TrEMBL;Acc:G5EEG4]
ENSG00000102575	ACP5	F02E9.7	F02E9.7
ENSG00000057757	PITHD1	ZK353.9	ZK353.9		PITH domain-containing protein ZK353.9 [Source:UniProtKB/Swiss-Prot;Acc:Q95ZI6]
ENSG00000176208	ATAD5	Y53F4B.9	Y53F4B.9
ENSG00000137200	CMTR1	Y53F4B.13	Y53F4B.13		Cap-specific mRNA (nucleoside-2'-O-)-methyltransferase 1 [Source:UniProtKB/Swiss-Prot;Acc:Q9NAA5]
ENSG00000147592	LACTB2	Y53F4B.39	Y53F4B.39		Beta-lactamase-like protein 2 homolog [Source:UniProtKB/Swiss-Prot;Acc:Q95Q18]
ENSG00000029639, ENSG00000086189	TFB1M, DIMT1	E02H1.1, T03F1.7	E02H1.1		Probable dimethyladenosine transferase [Source:UniProtKB/Swiss-Prot;Acc:Q09522]
ENSG00000168350, ENSG00000143753	DEGS1, DEGS2	ttm-5, F33D4.4	F33D4.4		Putative sphingolipid delta(4)-desaturase/C4-monooxygenase [Source:UniProtKB/Swiss-Prot;Acc:G5EC63]
ENSG00000141084, ENSG00000010017, ENSG00000167778	RANBP9, RANBP10, SPRYD3	Y54E5A.7	Y54E5A.7
ENSG00000009335	UBE3C	D2085.4	D2085.4	UBE3C
ENSG00000080007, ENSG00000184735	DDX53, DDX43	Y54G11A.3	Y54G11A.3
ENSG00000130165	ELOF1	Y54G11A.11	Y54G11A.11		Transcription elongation factor 1 homolog [Source:UniProtKB/Swiss-Prot;Acc:Q9XVZ8]
ENSG00000146005, ENSG00000125637, ENSG00000156011, ENSG00000059915	PSD4, PSD2, PSD, PSD3	efa-6	efa-6	PSD3	Exchange factor for Arf-6 [Source:UniProtKB/Swiss-Prot;Acc:G5EET6]
ENSG00000159579, ENSG00000164068	RSPRY1, RNF123	F16A11.1	F16A11.1
ENSG00000183066, ENSG00000132471	WBP2NL, WBP2	D2013.6, C18B2.4	D2013.6
ENSG00000085449, ENSG00000139668	WDFY2, WDFY1	wdfy-2	wdfy-2	WDFY1	WD repeat and FYVE domain-containing protein 2 [Source:UniProtKB/Swiss-Prot;Acc:Q18964]
ENSG00000096401	CDC5L	D1081.8	D1081.8
ENSG00000072954, ENSG00000095209	TMEM38A, TMEM38B	Y57A10A.28, Y57A10A.10	Y57A10A.28
ENSG00000165416	SUGT1	D1054.3	D1054.3	SUGT1
ENSG00000135932, ENSG00000102547	CAB39, CAB39L	mop-25.2, mop-25.1	mop-25.2	CAB39	MO25-like protein 2 [Source:UniProtKB/Swiss-Prot;Acc:O18211]
ENSG00000138760, ENSG00000135218, ENSG00000073060	SCARB1, SCARB2, CD36	scav-2, scav-4, scav-3, scav-6, scav-5, scav-1	scav-2		SCAVenger receptor (CD36 family) related [Source:UniProtKB/TrEMBL;Acc:G5EBM7]
ENSG00000119487	MAPKAP1	sinh-1	sinh-1		Stress-activated map kinase-interacting protein 1 homolog [Source:UniProtKB/Swiss-Prot;Acc:Q9NA80]
ENSG00000147144, ENSG00000151474, ENSG00000114541, ENSG00000163362	FRMD4B, CCDC120, C1orf106, FRMD4A	F07C6.4	F07C6.4	FRMD4B
ENSG00000103502	CDIPT	pisy-1	pisy-1		CDP-diacylglycerol--inositol 3-phosphatidyltransferase [Source:UniProtKB/TrEMBL;Acc:Q9U2G1]
ENSG00000215443, ENSG00000124224, ENSG00000154845	PPP4R1, PPP4R1L	ppfr-1	ppfr-1	PPP4R1	Protein Phosphatase Four Regulatory subunit [Source:UniProtKB/TrEMBL;Acc:G5ED93]
ENSG00000131711, ENSG00000166963, ENSG00000131016, ENSG00000130479	MAP1S, MAP1A, MAP1B, AKAP12	F25D7.4, C36A4.5, F32A7.5, tag-199	F25D7.4, C36A4.5	AKAP12, MAP1B
ENSG00000136891	TEX10	Y48A6C.4	Y48A6C.4
ENSG00000112367	FIG4	C34B7.2	C34B7.2
ENSG00000140521	POLG	polg-1	polg-1		POLG (Mitochondrial DNA POLymerase Gamma) [Source:UniProtKB/TrEMBL;Acc:Q9U208]
ENSG00000186280, ENSG00000107077, ENSG00000127663, ENSG00000235268, ENSG00000066135	KDM4A, KDM4D, KDM4E, KDM4C, KDM4B	jmjd-2	jmjd-2		Lysine-specific demethylase 4 [Source:UniProtKB/Swiss-Prot;Acc:Q9U297]
ENSG00000139637	C12orf10	C27H6.8	C27H6.8		UPF0160 protein C27H6.8 [Source:UniProtKB/Swiss-Prot;Acc:O17606]
ENSG00000126062	TMEM115	F11A10.6	F11A10.6
ENSG00000004866, ENSG00000007341	ST7, ST7L	F11A10.5	F11A10.5	ST7L	Protein ST7 homolog [Source:UniProtKB/Swiss-Prot;Acc:Q19337]
ENSG00000180628, ENSG00000056661, ENSG00000185619, ENSG00000168283, ENSG00000156374, ENSG00000115289	BMI1, PCGF6, PCGF1, PCGF5, PCGF3	mig-32	mig-32	BMI1, PCGF6, PCGF5, PCGF3
ENSG00000143919, ENSG00000087884	AAMDC, CAMKMT	Y48E1C.1	Y48E1C.1
ENSG00000062822	POLD1	F10C2.4	F10C2.4		DNA polymerase delta catalytic subunit [Source:UniProtKB/Swiss-Prot;Acc:P90829]
ENSG00000185085	INTS5	Y51A2D.7	Y51A2D.7
ENSG00000166136	NDUFB8	Y51H1A.3	Y51H1A.3
ENSG00000153487, ENSG00000168395, ENSG00000168556, ENSG00000071243, ENSG00000111653	ING4, ING1, ING2, ING5, ING3	lsy-13, ing-3	ing-3	ING5, ING3
ENSG00000065615	CYB5R4	Y52B11A.3	Y52B11A.3
ENSG00000140905	GCSH	gcsh-1, F52A8.5	F52A8.5	GCSH	Glycine cleavage system H protein [Source:UniProtKB/TrEMBL;Acc:O62122]
ENSG00000058729	RIOK2	riok-2	riok-2	RIOK2	Serine/threonine-protein kinase RIO2 [Source:UniProtKB/Swiss-Prot;Acc:Q95Q34]
ENSG00000078618, ENSG00000119912	IDE, NRD1	C02G6.2, F44E7.4, Y70C5C.1, C28F5.4, C02G6.1	F44E7.4
ENSG00000070610	GBA2	R08F11.1, hpo-13	hpo-13		Non-lysosomal glucosylceramidase [Source:UniProtKB/TrEMBL;Acc:O01893]
ENSG00000232297, ENSG00000103472, ENSG00000085721, ENSG00000179038	RRN3P2, RRN3, RP11-157K17.5	C36E8.1	C36E8.1	RRN3
ENSG00000111231	GPN3	Y75B8A.14	Y75B8A.14	GPN3
ENSG00000188985, ENSG00000178700, ENSG00000228716	DHFRL1, DHFR, DHFRP1	dhfr-1	dhfr-1		Putative dihydrofolate reductase [Source:UniProtKB/Swiss-Prot;Acc:Q93341]
ENSG00000102978	POLR2C	rpb-3	rpb-3		RNA Polymerase II (B) subunit [Source:UniProtKB/TrEMBL;Acc:Q93338]
ENSG00000197355, ENSG00000117143	UAP1, UAP1L1	C36A4.4, K06B9.2	C36A4.4		Probable UDP-N-acetylglucosamine pyrophosphorylase [Source:UniProtKB/Swiss-Prot;Acc:Q18493]
ENSG00000197142, ENSG00000123983, ENSG00000151726, ENSG00000068366, ENSG00000164398	ACSL1, ACSL4, ACSL6, ACSL3, ACSL5	acs-17, acs-5, acs-13, acs-4	acs-4	ACSL4, ACSL3	Fatty Acid CoA Synthetase family [Source:UniProtKB/TrEMBL;Acc:Q18660]
ENSG00000128829	EIF2AK4	gcn-2	gcn-2		Eukaryotic translation initiation factor 2-alpha kinase gcn-2 [Source:UniProtKB/Swiss-Prot;Acc:D0Z5N4]
ENSG00000125703, ENSG00000130734, ENSG00000168397, ENSG00000101844	ATG4B, ATG4A, ATG4C, ATG4D	atg-4.2, atg-4.1	atg-4.1		Cysteine protease [Source:UniProtKB/TrEMBL;Acc:Q9U1N6]
ENSG00000105220	GPI	gpi-1	gpi-1		Glucose-6-phosphate isomerase [Source:UniProtKB/TrEMBL;Acc:Q7K707]
ENSG00000151470	C4orf33	C33A12.3	C33A12.3	C4orf33
ENSG00000025800, ENSG00000186432, ENSG00000196911, ENSG00000114030, ENSG00000102753	KPNA3, KPNA4, KPNA5, KPNA6, KPNA1	ima-3	ima-3	KPNA5, KPNA1, KPNA4	Importin subunit alpha-3 [Source:UniProtKB/Swiss-Prot;Acc:Q19969]
ENSG00000165169, ENSG00000146425	DYNLT3, DYNLT1	dylt-3, dylt-1	dylt-1	DYNLT3	DYnein Light chain (Tctex type) [Source:UniProtKB/TrEMBL;Acc:Q22226]
ENSG00000184983	NDUFA6	nuo-3	nuo-3		NADH Ubiquinone Oxidoreductase [Source:UniProtKB/TrEMBL;Acc:O18236]
ENSG00000144589, ENSG00000010322	NISCH, STK11IP	F13E9.1	F13E9.1
ENSG00000131773, ENSG00000112232, ENSG00000121774	KHDRBS2, KHDRBS3, KHDRBS1	Y69A2AR.32, B0280.17, Y57G11C.36, K07H8.9	Y69A2AR.32, Y57G11C.36, K07H8.9
ENSG00000125633	CCDC93	C31E10.5, C31E10.6, C16A11.2	C31E10.5
ENSG00000244462, ENSG00000183808	RBM12B, RBM12	Y106G6D.7	Y106G6D.7	RBM12B
ENSG00000138382	METTL5	C38D4.9	C38D4.9
ENSG00000040531	CTNS	ctns-1	ctns-1		Cystinosin homolog [Source:UniProtKB/Swiss-Prot;Acc:Q09500]
ENSG00000146373	RNF217	Y57A10A.31	Y57A10A.31
ENSG00000066279	ASPM	aspm-1	aspm-1	ASPM
ENSG00000130313	PGLS	Y57G11C.3	Y57G11C.3		Putative 6-phosphogluconolactonase [Source:UniProtKB/Swiss-Prot;Acc:O18229]
ENSG00000118518	RNF146	C55A6.1, Y105E8A.14, C26B9.6, C02B8.6	C55A6.1
ENSG00000100568, ENSG00000151532	VTI1B, VTI1A	vti-1	vti-1		VTI (Vesicle Transport through t-SNARE Interaction) homolog [Source:UniProtKB/TrEMBL;Acc:O18230]
ENSG00000155265, ENSG00000147533	GOLGA7B, GOLGA7	Y57G11C.33	Y57G11C.33
ENSG00000027001	MIPEP	Y67H2A.7	Y67H2A.7
ENSG00000101161	PRPF6	prp-6	prp-6		Yeast PRP (Splicing factor) related [Source:UniProtKB/TrEMBL;Acc:Q9GRZ2]
ENSG00000188026, ENSG00000167705, ENSG00000150977	RILPL2, RILP, RILPL1	rilp-1	rilp-1		RILP (Rab7-Interacting Lysosomal Protein) homolog [Source:UniProtKB/TrEMBL;Acc:G5EDL7]
ENSG00000183828	NUDT14	C50F4.16	C50F4.16
ENSG00000181830	SLC35C1	nstp-10, nstp-9	nstp-10		GDP-fucose transporter [Source:UniProtKB/Swiss-Prot;Acc:Q968A5]
ENSG00000146733	PSPH	Y62E10A.13	Y62E10A.13	PSPH
ENSG00000110075, ENSG00000105063, ENSG00000100239	PPP6R2, PPP6R3, PPP6R1	saps-1	saps-1		SAPS (Phosphatase associated) domain protein [Source:UniProtKB/TrEMBL;Acc:Q18696]
ENSG00000164187	LMBRD2	C47G2.4	C47G2.4		LMBR1 domain-containing protein 2 homolog [Source:UniProtKB/Swiss-Prot;Acc:Q18695]
ENSG00000177370	TIMM22	C47G2.3	C47G2.3		Mitochondrial import inner membrane translocase subunit tim-22 [Source:UniProtKB/Swiss-Prot;Acc:Q9NAQ9]
ENSG00000167272	POP5	Y66A7A.2	Y66A7A.2		Ribonuclease P/MRP protein subunit POP5 [Source:UniProtKB/TrEMBL;Acc:G5EF59]
ENSG00000158411	MITD1	Y66D12A.10	Y66D12A.10
ENSG00000162604	TM2D1	Y66D12A.21	Y66D12A.21		TM2 domain-containing protein Y66D12A.21 [Source:UniProtKB/Swiss-Prot;Acc:Q95PJ8]
ENSG00000134759	ELP2	elpc-2	elpc-2		ELongator complex Protein Component [Source:UniProtKB/TrEMBL;Acc:Q9NEW7]
ENSG00000204764, ENSG00000130227	XPO7, RANBP17	C35A5.8	C35A5.8	XPO7
ENSG00000136167, ENSG00000072110, ENSG00000130402, ENSG00000077522, ENSG00000102024, ENSG00000120756	PLS1, ACTN4, ACTN1, PLS3, LCP1, ACTN2	atn-1, plst-1, Y73B3B.1	plst-1	PLS3	AcTiniN [Source:UniProtKB/TrEMBL;Acc:H2L2C8]
ENSG00000116459	ATP5F1	asb-2, asb-1	asb-1		ATP Synthase B homolog [Source:UniProtKB/TrEMBL;Acc:Q19126]
ENSG00000163950	SLBP	cdl-1	cdl-1	SLBP	Histone RNA hairpin-binding protein [Source:UniProtKB/Swiss-Prot;Acc:Q09599]
ENSG00000132964, ENSG00000155111	CDK8, CDK19	cdk-8	cdk-8		Cyclin-dependent kinase 8 [Source:UniProtKB/Swiss-Prot;Acc:P90866]
ENSG00000183207	RUVBL2	ruvb-2	ruvb-2		RuvB-like 2 [Source:UniProtKB/Swiss-Prot;Acc:Q9GZH2]
ENSG00000105202, ENSG00000188573	FBL, FBLL1	fib-1	fib-1		rRNA 2'-O-methyltransferase fibrillarin [Source:UniProtKB/Swiss-Prot;Acc:Q22053]
ENSG00000163644, ENSG00000163590, ENSG00000175175, ENSG00000100034	PPM1E, PPM1K, PPM1L, PPM1F	fem-2	fem-2		Ca(2+)/calmodulin-dependent protein kinase phosphatase [Source:UniProtKB/Swiss-Prot;Acc:P49594]
ENSG00000116675, ENSG00000178950, ENSG00000204113, ENSG00000115977, ENSG00000138756	DNAJC6, BMP2K, GAK, AAK1, BMP2KL	dnj-25, sel-5, tag-257	sel-5	BMP2K	Auxilin; DNaJ domain (Prokaryotic heat shock protein) [Source:UniProtKB/TrEMBL;Acc:G5EDJ6]
ENSG00000213551	DNAJC9	dnj-23	dnj-23		DNaJ domain (Prokaryotic heat shock protein) [Source:UniProtKB/TrEMBL;Acc:Q22751]
ENSG00000120805	ARL1	arl-1	arl-1	ARL1	ADP-ribosylation factor-like protein 1 [Source:UniProtKB/Swiss-Prot;Acc:Q20758]
ENSG00000071655, ENSG00000237247, ENSG00000205718, ENSG00000170948, ENSG00000182315, ENSG00000134046	MBD3L4, MBD3L1, MBD3, MBD3L3, MBD2, MBD3L5	mbd-2	mbd-2		Methyl-CpG BinDing protein; Methyl-binding protein-2 [Source:UniProtKB/TrEMBL;Acc:G5ECR1]
ENSG00000165527	ARF6	arf-6	arf-6	ARF6	ADP-Ribosylation Factor related [Source:UniProtKB/TrEMBL;Acc:Q9U2S4]
ENSG00000073464, ENSG00000109572, ENSG00000171365	CLCN4, CLCN5, CLCN3	clh-5	clh-5	CLCN3	Chloride channel protein [Source:UniProtKB/TrEMBL;Acc:G5EGT4]
ENSG00000145780, ENSG00000141965, ENSG00000169018	FEM1C, FEM1B, FEM1A	fem-1	fem-1	FEM1C	Sex-determining protein fem-1 [Source:UniProtKB/Swiss-Prot;Acc:P17221]
ENSG00000168724	DNAJC21	dnj-17	dnj-17		DNaJ domain (Prokaryotic heat shock protein) [Source:UniProtKB/TrEMBL;Acc:O62360]
ENSG00000108504, ENSG00000164885, ENSG00000170312, ENSG00000123374	CDK1, CDK2, CDK5	cdk-2, cdk-1, cdk-5	cdk-2, cdk-1	CDK2	Cyclin-dependent kinase 2 [Source:UniProtKB/Swiss-Prot;Acc:O61847]
ENSG00000127588	GNG13	gpc-2	gpc-2		G Protein, Gamma subunit; Heterotrimeric G protein gamma subunit 2 [Source:UniProtKB/TrEMBL;Acc:G5ECT6]
ENSG00000100726	TELO2	clk-2	clk-2		Telomere length regulation protein clk-2 [Source:UniProtKB/Swiss-Prot;Acc:Q95YE9]
ENSG00000136807	CDK9	cdk-9	cdk-9		Probable cyclin-dependent kinase 9 [Source:UniProtKB/Swiss-Prot;Acc:Q9TVL3]
ENSG00000135040	NAA35	T23B12.4	T23B12.4
ENSG00000094804, ENSG00000085840	CDC6, ORC1	cdc-6, orc-1	cdc-6		Cell Division Cycle related [Source:UniProtKB/TrEMBL;Acc:P91155]
ENSG00000145715	RASA1	gap-3	gap-3	RASA1	GTPase Activating Protein family [Source:UniProtKB/TrEMBL;Acc:Q95XA9]
ENSG00000101224, ENSG00000158402, ENSG00000164045	CDC25A, CDC25B, CDC25C	cdc-25.1, cdc-25.3, cdc-25.4, cdc-25.2	cdc-25.1	CDC25A	M-phase inducer phosphatase cdc-25.1 [Source:UniProtKB/Swiss-Prot;Acc:O44552]
ENSG00000131375	CAPN7	clp-2	clp-2		CaLPain family [Source:UniProtKB/TrEMBL;Acc:Q22143]
ENSG00000160445	ZER1	zer-1	zer-1		Zyg eleven-related protein 1 [Source:UniProtKB/Swiss-Prot;Acc:Q2WF59]
ENSG00000096060, ENSG00000198225, ENSG00000088832, ENSG00000077800, ENSG00000004478, ENSG00000119782	FKBP1B, FKBP6, FKBP1C, FKBP1A, FKBP5, FKBP4	fkb-2, fkb-6, fkb-8	fkb-6	FKBP4, FKBP5	Peptidylprolyl isomerase [Source:UniProtKB/TrEMBL;Acc:Q9U2Q8]
ENSG00000162695, ENSG00000145740, ENSG00000164756, ENSG00000115194, ENSG00000158014, ENSG00000196660, ENSG00000170385, ENSG00000104154	SLC30A8, SLC30A10, SLC30A3, SLC30A2, SLC30A1, SLC30A7, SLC30A4, SLC30A5	ttm-1, cdf-2, cdf-1, Y105E8A.3	Y105E8A.3		Toxin-regulated Targets of MAPK [Source:UniProtKB/TrEMBL;Acc:O45923]
ENSG00000111640, ENSG00000105679, ENSG00000235868, ENSG00000183663	GAPDH, RP11-44N17.1, GAPDHP31, GAPDHS	gpd-2, gpd-1, gpd-4, gpd-3	gpd-1		Glyceraldehyde-3-phosphate dehydrogenase 2 [Source:UniProtKB/Swiss-Prot;Acc:P17329]
ENSG00000130764	LRRC47	Y54E10A.6	Y54E10A.6
ENSG00000153898, ENSG00000055732, ENSG00000090674	MCOLN2, MCOLN3, MCOLN1	cup-5	cup-5		CUP-5L [Source:UniProtKB/TrEMBL;Acc:Q8T666]
ENSG00000139914, ENSG00000197296	FITM1, FITM2	ZK265.9	ZK265.9
ENSG00000103671	TRIP4	asc-1	asc-1	TRIP4	ASC-1; Activating Signal Cointegrator homolog [Source:UniProtKB/TrEMBL;Acc:G5EDK1]
ENSG00000169188, ENSG00000100823	APEX2, APEX1	exo-3	exo-3	APEX1	DNA-(apurinic or apyrimidinic site) lyase [Source:UniProtKB/TrEMBL;Acc:G5EBR7]
ENSG00000026036, ENSG00000258366, ENSG00000136492	RTEL1, RTEL1-TNFRSF6B, BRIP1	rtel-1, dog-1	dog-1		Regulator of telomere elongation helicase 1 homolog [Source:UniProtKB/Swiss-Prot;Acc:Q93575]
ENSG00000131381	RBSN	rabs-5	rabs-5		RABenoSyn (Trafficking protein) homolog [Source:UniProtKB/TrEMBL;Acc:W6SBE5]
ENSG00000185036, ENSG00000198961, ENSG00000121848, ENSG00000070423, ENSG00000168894, ENSG00000181191	PJA2, RNF126, PJA1, RNF181	Y54E10BR.3	Y54E10BR.3	PJA2
ENSG00000158290, ENSG00000139842	CUL4B, CUL4A	cul-4	cul-4		Cullin-4 [Source:UniProtKB/Swiss-Prot;Acc:Q17392]
ENSG00000141030	COPS3	csn-3	csn-3		COP9 signalosome complex subunit 3 [Source:UniProtKB/Swiss-Prot;Acc:Q9N425]
ENSG00000066044, ENSG00000122378, ENSG00000157870, ENSG00000196361, ENSG00000162374, ENSG00000107105	FAM213B, FAM213A, ELAVL2, ELAVL4, ELAVL1, ELAVL3	R53.5, exc-7	R53.5	ELAVL1
ENSG00000166816	LDHD	rrf-1, ego-1, rrf-3, rrf-2, F32D8.12	ego-1, rrf-3, rrf-1		RNA-dependent RNA polymerase Family; RRF-1 [Source:UniProtKB/TrEMBL;Acc:G5ECM1]
ENSG00000131269, ENSG00000115657	ABCB7, ABCB6	abtm-1, hmt-1	hmt-1		ABC Transporter, Mitochondrial [Source:UniProtKB/TrEMBL;Acc:A0A061ACG9]
ENSG00000111276	CDKN1B	cki-2	cki-2	CDKN1B	CKI family (Cyclin-dependent Kinase Inhibitor); Cyclin-dependent kinase inhibitor [Source:UniProtKB/TrEMBL;Acc:G5EEJ2]
ENSG00000103423	DNAJA3	dnj-10	dnj-10	DNAJA3	DnaJ homolog dnj-10 [Source:UniProtKB/Swiss-Prot;Acc:Q8TA83]
ENSG00000115970	THADA	Y92H12A.5	Y92H12A.5
ENSG00000175305, ENSG00000105173	CCNE2, CCNE1	cye-1	cye-1	CCNE2	G1/S-specific cyclin-E [Source:UniProtKB/Swiss-Prot;Acc:O01501]
ENSG00000188603	CLN3	cln-3.1, cln-3.2, cln-3.3	cln-3.2		Battenin [Source:UniProtKB/TrEMBL;Acc:G5EBM4]
ENSG00000122121, ENSG00000108039	XPNPEP2, XPNPEP1	Y45G5AM.2, app-1	Y45G5AM.2
ENSG00000131504, ENSG00000147202, ENSG00000139734	DIAPH1, DIAPH3, DIAPH2	cyk-1	cyk-1	DIAPH1, DIAPH3	CYtoKinesis defect [Source:UniProtKB/TrEMBL;Acc:H2KYI3]
ENSG00000099942, ENSG00000167193	CRK, CRKL	ced-2	ced-2		Cell death abnormality protein 2 [Source:UniProtKB/Swiss-Prot;Acc:Q9NHC3]
ENSG00000151503	NCAPD3	hcp-6	hcp-6	NCAPD3	HoloCentric chromosome binding Protein [Source:UniProtKB/TrEMBL;Acc:Q95Y84]
ENSG00000171720, ENSG00000196591, ENSG00000116478	HDAC2, HDAC1, HDAC3	hda-3, hda-1	hda-3	HDAC3	Histone deacetylase [Source:UniProtKB/TrEMBL;Acc:G5ECH0]
ENSG00000141552, ENSG00000215639	ANAPC11	apc-11	apc-11		Anaphase-promoting complex subunit 11 [Source:UniProtKB/Swiss-Prot;Acc:Q20052]
ENSG00000164162	ANAPC10	apc-10, Y48G1C.12	Y48G1C.12	ANAPC10	Anaphase-promoting complex subunit 10 [Source:UniProtKB/Swiss-Prot;Acc:H2L2B8]
ENSG00000175115, ENSG00000179364	PACS1, PACS2	tag-232	tag-232
ENSG00000147082, ENSG00000134057, ENSG00000157456, ENSG00000133101, ENSG00000145386	CCNA2, CCNB1, CCNB3, CCNA1, CCNB2	cyb-2.1, cyb-3, ZK507.6, cyb-2.2, cyb-1	cyb-2.2, cyb-2.1, cyb-1	CCNA2	CYclin B [Source:UniProtKB/TrEMBL;Acc:O45926]
ENSG00000126698	DNAJC8	dnj-30	dnj-30		DNaJ domain (Prokaryotic heat shock protein) [Source:UniProtKB/TrEMBL;Acc:A0A078BS22]
ENSG00000055917, ENSG00000134644	PUM2, PUM1	fbf-2, puf-5, puf-8, fbf-1, puf-9, puf-4, puf-7, puf-3, puf-6, puf-11	fbf-2, puf-5, puf-8, fbf-1, puf-7, puf-6, puf-11	PUM2, PUM1	Fem-3 mRNA-binding factor 2 [Source:UniProtKB/Swiss-Prot;Acc:Q09312]
ENSG00000115053, ENSG00000160014, ENSG00000143933, ENSG00000231409, ENSG00000241343, ENSG00000178363, ENSG00000214759, ENSG00000165502, ENSG00000198668	RPL36A, CALM1, NCL, CALML3, CALM3, CTD-2509G16.1, RPL36AL, RP11-83J16.1, CALM2	cmd-1, rpl-41, K07H8.10	K07H8.10	CALM1, NCL	Calmodulin [Source:UniProtKB/Swiss-Prot;Acc:O16305]
ENSG00000173221, ENSG00000118990, ENSG00000023572	GLRXP3, GLRX, GLRX2	glrx-10, glrx-22, glrx-21	glrx-22		GLutaRedoXin [Source:UniProtKB/TrEMBL;Acc:Q9N456]
ENSG00000168002	POLR2G	rpb-7	rpb-7		RNA Polymerase II (B) subunit [Source:UniProtKB/TrEMBL;Acc:Q9N3C9]
ENSG00000167513	CDT1	cdt-1	cdt-1		CDT (S. pombe CDC10 Dependent Transcript) homolog [Source:UniProtKB/TrEMBL;Acc:Q86S68]
ENSG00000005194	CIAPIN1	T20B12.7	T20B12.7		Anamorsin homolog [Source:UniProtKB/Swiss-Prot;Acc:P41847]
ENSG00000079246	XRCC5	cku-80	cku-80	XRCC5	ATP-dependent DNA helicase II subunit 2 [Source:UniProtKB/TrEMBL;Acc:Q21829]
ENSG00000106367, ENSG00000182287, ENSG00000152056	AP1S3, AP1S2, AP1S1	aps-1	aps-1	AP1S3, AP1S1	AdaPtin, Small chain (Clathrin associated complex) [Source:UniProtKB/TrEMBL;Acc:O16369]
ENSG00000077147	TM9SF3	Y41D4A.4	Y41D4A.4		Transmembrane 9 superfamily member [Source:UniProtKB/TrEMBL;Acc:Q95Y24]
ENSG00000213983, ENSG00000166747	AP1G2, AP1G1	apg-1	apg-1	AP1G1	AdaPtin, Gamma chain (Clathrin associated complex) [Source:UniProtKB/TrEMBL;Acc:Q8WQB3]
ENSG00000042753	AP2S1	aps-2	aps-2		AdaPtin, Small chain (Clathrin associated complex) [Source:UniProtKB/TrEMBL;Acc:Q19123]
ENSG00000263138, ENSG00000187800, ENSG00000157890, ENSG00000145794, ENSG00000162591	MEGF11, MEGF6, PEAR1, MEGF10	ced-1, Y64G10A.7	ced-1		Cell death abnormality protein 1 [Source:UniProtKB/Swiss-Prot;Acc:Q9XWD6]
ENSG00000127580	WDR24	Y32H12A.8	Y32H12A.8
ENSG00000183434, ENSG00000114126, ENSG00000198176	TFDP1, TFDP3, TFDP2	dpl-1	dpl-1	TFDP1, TFDP2	Transcription factor dpl-1 [Source:UniProtKB/Swiss-Prot;Acc:Q22703]
ENSG00000074706, ENSG00000142675, ENSG00000149970, ENSG00000153721	IPCEF1, CNKSR3, CNKSR1, CNKSR2	cnk-1	cnk-1		Connector enhancer of kinase suppressor of ras [Source:UniProtKB/Swiss-Prot;Acc:G5EEW9]
ENSG00000006125, ENSG00000100280	AP2B1, AP1B1	apb-1	apb-1		AP complex subunit beta [Source:UniProtKB/TrEMBL;Acc:Q9N4F3]
ENSG00000161202, ENSG00000107404, ENSG00000004975	DVL1, DVL2, DVL3	dsh-2, mig-5, dsh-1	dsh-2		DiSHevelled related [Source:UniProtKB/TrEMBL;Acc:Q18239]
ENSG00000169679	BUB1	bub-1	bub-1	BUB1	Mitotic checkpoint serine/threonine-protein kinase bub-1 [Source:UniProtKB/Swiss-Prot;Acc:Q21776]
ENSG00000196683	TOMM7	tomm-7	tomm-7		Mitochondrial import receptor subunit TOM7 homolog [Source:UniProtKB/Swiss-Prot;Acc:P34660]
ENSG00000227324, ENSG00000089289	IGBP1	ppfr-4	ppfr-4		Protein Phosphatase Four Regulatory subunit [Source:UniProtKB/TrEMBL;Acc:Q9N4E9]
ENSG00000112578	BYSL	byn-1	byn-1		Cell adhesion protein byn-1 [Source:UniProtKB/Swiss-Prot;Acc:Q20932]
ENSG00000164902	PHAX	Y71H2B.2	Y71H2B.2	PHAX
ENSG00000165304	MELK	pig-1	pig-1	MELK	Maternal embryonic leucine zipper kinase [Source:UniProtKB/Swiss-Prot;Acc:U4PR86]
ENSG00000108773, ENSG00000114166	KAT2A, KAT2B	pcaf-1	pcaf-1		P300/CBP Associated Factor homolog [Source:UniProtKB/TrEMBL;Acc:Q9N3S7]
ENSG00000108094	CUL2	cul-2	cul-2	CUL2	Cullin-2 [Source:UniProtKB/Swiss-Prot;Acc:Q17390]
ENSG00000105325	FZR1	fzr-1	fzr-1		FiZzy Related family [Source:UniProtKB/TrEMBL;Acc:Q09649]
ENSG00000128245, ENSG00000170027, ENSG00000164924, ENSG00000108953, ENSG00000166913	YWHAE, YWHAB, YWHAG, YWHAH, YWHAZ	ftt-2, par-5	par-5	YWHAZ, YWHAG	14-3-3-like protein 2 [Source:UniProtKB/Swiss-Prot;Acc:Q20655]
ENSG00000213985, ENSG00000138071	AC078899.1, ACTR2	arx-2	arx-2		Actin-related protein 2 [Source:UniProtKB/Swiss-Prot;Acc:P53489]
ENSG00000144224	UBXN4	ubxn-4	ubxn-4		UBX domain-containing protein 4 [Source:UniProtKB/Swiss-Prot;Acc:P34631]
ENSG00000137449, ENSG00000214575, ENSG00000113742, ENSG00000107864	CPEB4, CPEB1, CPEB2, CPEB3	cpb-2, fog-1, cpb-1, cpb-3	fog-1, cpb-1, cpb-3	CPEB2, CPEB4	Cytoplasmic polyadenylation element-binding protein 2 [Source:UniProtKB/Swiss-Prot;Acc:Q18317]
ENSG00000185024	BRF1	brf-1	brf-1		BRF (Transcription factor) homolog [Source:UniProtKB/TrEMBL;Acc:A0A131MCT5]
ENSG00000141452	C18orf8	Y50D4A.4	Y50D4A.4
ENSG00000095564	BTAF1	btf-1	btf-1	BTAF1	BTAF (TBP-associated factor) homolog [Source:UniProtKB/TrEMBL;Acc:G5EF07]
ENSG00000144182	LIPT1	C45G3.3	C45G3.3
ENSG00000057608, ENSG00000203879, ENSG00000268690	GDI2, GDI1	gdi-1	gdi-1		Rab GDP dissociation inhibitor [Source:UniProtKB/TrEMBL;Acc:G5EBR1]
ENSG00000126787, ENSG00000170579, ENSG00000080845, ENSG00000198010, ENSG00000116544	DLGAP5, DLGAP2, DLGAP3, DLGAP1, DLGAP4	W03A5.4	W03A5.4	DLGAP5, DLGAP4
ENSG00000138160	KIF11	bmk-1	bmk-1	KIF11	Kinesin-like protein [Source:UniProtKB/TrEMBL;Acc:G5EGL7]
ENSG00000015171, ENSG00000101040	ZMYND8, ZMYND11	bra-2, bra-1	bra-2		BMP Receptor Associated protein family [Source:UniProtKB/TrEMBL;Acc:O01918]
ENSG00000115694, ENSG00000102572, ENSG00000134602	STK25, STK24, STK26	gck-1	gck-1	STK24	Germinal center kinase 1 [Source:UniProtKB/Swiss-Prot;Acc:H2L099]
ENSG00000105677	TMEM147	ZK418.5	ZK418.5
ENSG00000089685	BIRC5	bir-1, bir-2	bir-1, bir-2		BIR (Baculovirus inhibitory repeat) family; Inhibitor of apoptosis homolog [Source:UniProtKB/TrEMBL;Acc:G5EFA2]
ENSG00000126581	BECN1	bec-1	bec-1		Beclin homolog [Source:UniProtKB/Swiss-Prot;Acc:Q22592]
ENSG00000198898, ENSG00000177938, ENSG00000116489	CAPZA3, CAPZA2, CAPZA1	cap-1	cap-1	CAPZA2, CAPZA1	F-actin-capping protein subunit alpha [Source:UniProtKB/Swiss-Prot;Acc:P34685]
ENSG00000182632, ENSG00000163249, ENSG00000216671, ENSG00000108100	CCNYL2, CCNYL3, CCNY, CCNYL1	cyy-1	cyy-1	CCNY	Cyclin-Y [Source:UniProtKB/Swiss-Prot;Acc:P34624]
ENSG00000164754, ENSG00000244588	RAD21, RAD21L1	coh-1, scc-1	scc-1	RAD21	COHesin family [Source:UniProtKB/TrEMBL;Acc:A0A131MBD0]
ENSG00000082068	WDR70	gad-1	gad-1		Gastrulation defective protein 1 [Source:UniProtKB/Swiss-Prot;Acc:O16519]
ENSG00000132763	MMACHC	cblc-1	cblc-1		MMACHC-like protein [Source:UniProtKB/Swiss-Prot;Acc:Q7Z144]
ENSG00000161791, ENSG00000157827, ENSG00000184922	FMNL3, FMNL2, FMNL1	frl-1	frl-1		FRL (Formin Related gene in Leukocytes) homolog [Source:UniProtKB/TrEMBL;Acc:Q9BL72]
ENSG00000164287, ENSG00000117399	CDC20, CDC20B	fzy-1	fzy-1		WD repeat-containing protein fzy-1 [Source:UniProtKB/Swiss-Prot;Acc:Q09373]
ENSG00000154767	XPC	xpc-1	xpc-1		XPC (Xeroderma Pigmentosum group C) DNA repair gene homolog [Source:UniProtKB/TrEMBL;Acc:Q9N4C3]
ENSG00000147174	ACRC	ZK328.4	ZK328.4
ENSG00000167281, ENSG00000100320, ENSG00000078328	RBFOX1, RBFOX2, RBFOX3	spn-4, asd-1, fox-1	asd-1		PIP-1 [Source:UniProtKB/TrEMBL;Acc:G5EF02]
ENSG00000162704, ENSG00000136950	ARPC5, ARPC5L	arx-7, C46H11.3	arx-7	ARPC5, ARPC5L	Actin-related protein 2/3 complex subunit 5 [Source:UniProtKB/TrEMBL;Acc:O61861]
ENSG00000105778	AVL9	T26A5.6	T26A5.6
ENSG00000163466	ARPC2	arx-4	arx-4		Probable actin-related protein 2/3 complex subunit 2 [Source:UniProtKB/Swiss-Prot;Acc:Q8WTM6]
ENSG00000100522	GNPNAT1	gna-1, gna-2	gna-2	GNPNAT1	Glucosamine 6-phosphate N-acetyltransferase [Source:UniProtKB/Swiss-Prot;Acc:Q17427]
ENSG00000166266	CUL5	cul-5	cul-5	CUL5	Cullin-5 [Source:UniProtKB/Swiss-Prot;Acc:Q23639]
ENSG00000144366	GULP1	ced-6	ced-6		Cell death protein 6 [Source:UniProtKB/Swiss-Prot;Acc:O76337]
ENSG00000135624	CCT7	cct-7	cct-7		Chaperonin Containing TCP-1 [Source:UniProtKB/TrEMBL;Acc:Q9TZS5]
ENSG00000167283	ATP5L	asg-1, asg-2	asg-1		Probable ATP synthase subunit g 1, mitochondrial [Source:UniProtKB/Swiss-Prot;Acc:P90921]
ENSG00000073536	NLE1	W07E6.2	W07E6.2
ENSG00000118420	UBE3D	Y71H2AM.3	Y71H2AM.3
ENSG00000162300	ZFPL1	Y45G12B.2	Y45G12B.2		Zinc finger protein-like 1 homolog [Source:UniProtKB/Swiss-Prot;Acc:Q9N4Y9]
ENSG00000186684, ENSG00000019186, ENSG00000111012, ENSG00000135929, ENSG00000140459	CYP27A1, CYP27C1, CYP24A1, CYP11A1, CYP27B1	cyp-44A1, ZK177.4	cyp-44A1, ZK177.4		Probable cytochrome P450 CYP44 [Source:UniProtKB/Swiss-Prot;Acc:Q09660]
ENSG00000138767, ENSG00000113300	CNOT6, CNOT6L	ccr-4	ccr-4		CCR (Yeast CCR4/NOT complex component) homolog; CCR4 [Source:UniProtKB/TrEMBL;Acc:G5EE09]
ENSG00000163539, ENSG00000074054	CLASP1, CLASP2	cls-1, cls-2, cls-3	cls-2	CLASP1
ENSG00000119844	AFTPH	Y45G5AM.9	Y45G5AM.9	AFTPH
ENSG00000012983, ENSG00000011566, ENSG00000104814, ENSG00000168067	MAP4K3, MAP4K2, MAP4K5, MAP4K1	gck-2	gck-2	MAP4K3	Mitogen-activated protein kinase kinase kinase kinase [Source:UniProtKB/TrEMBL;Acc:Q23290]
ENSG00000081237	PTPRC	clr-1	clr-1		Receptor-type tyrosine-protein phosphatase [Source:UniProtKB/Swiss-Prot;Acc:H2KZM6]
ENSG00000120837, ENSG00000148229	POLE3, NFYB	nfyb-1, T26A5.8	T26A5.8	NFYB	Nuclear transcription Factor Y, B (Beta) subunit [Source:UniProtKB/TrEMBL;Acc:O17286]
ENSG00000113810	SMC4	dpy-27, smc-4	smc-4		Chromosome condensation protein dpy-27 [Source:UniProtKB/Swiss-Prot;Acc:P48996]
ENSG00000112531	QKI	gld-1, asd-2	gld-1		Female germline-specific tumor suppressor gld-1 [Source:UniProtKB/Swiss-Prot;Acc:Q17339]
ENSG00000115267, ENSG00000187790, ENSG00000107201, ENSG00000260178, ENSG00000108771	FANCM, DHX58, IFIH1, DDX58	drh-3, drh-1	drh-3		Dicer Related Helicase [Source:UniProtKB/TrEMBL;Acc:Q93413]
ENSG00000106993, ENSG00000196585, ENSG00000105401, ENSG00000196347	CDC37L1, CDC37	cdc-37	cdc-37		Probable Hsp90 co-chaperone cdc37 [Source:UniProtKB/Swiss-Prot;Acc:O02108]
ENSG00000171621, ENSG00000111671, ENSG00000175093	SPSB1, SPSB2, SPSB4	spsb-2, spsb-1	spsb-2		SPSB (SPry and Socs Box) family [Source:UniProtKB/TrEMBL;Acc:Q965N7]
ENSG00000083223, ENSG00000164329, ENSG00000134744	PAPD4, ZCCHC11, ZCCHC6	cid-1, gld-2, Y34F4.3, pup-2	gld-2	PAPD4	Caffeine Induced Death (S. pombe Cid) homolog [Source:UniProtKB/TrEMBL;Acc:Q09409]
ENSG00000149311	ATM	atm-1	atm-1	ATM	Serine/threonine-protein kinase ATM [Source:UniProtKB/Swiss-Prot;Acc:Q9N3Q4]
ENSG00000152670, ENSG00000215301, ENSG00000067048	DDX3Y, DDX3X, DDX4	glh-4, F58G11.2, glh-2, glh-3, vbh-1, ZC317.1, mut-14, glh-1, Y38A10A.6, laf-1	glh-2, glh-3, vbh-1, mut-14, glh-1		ATP-dependent RNA helicase glh-4 [Source:UniProtKB/Swiss-Prot;Acc:O76743]
ENSG00000175054	ATR	atl-1	atl-1	ATR	Serine/threonine-protein kinase ATR [Source:UniProtKB/Swiss-Prot;Acc:Q22258]
ENSG00000005339, ENSG00000100393	CREBBP, EP300	cbp-1, K03H1.10	cbp-1	CREBBP, EP300
ENSG00000132664	POLR3F	W09C3.4	W09C3.4		Probable DNA-directed RNA polymerase III subunit RPC6 [Source:UniProtKB/Swiss-Prot;Acc:P91529]
ENSG00000143155	TIPRL	ZK688.9	ZK688.9	TIPRL	TIP41-like protein [Source:UniProtKB/Swiss-Prot;Acc:P34274]
ENSG00000110619, ENSG00000134905	CARS, CARS2	cars-1	cars-1	CARS2	Cysteinyl Amino-acyl tRNA Synthetase [Source:UniProtKB/TrEMBL;Acc:O76618]
ENSG00000147955	SIGMAR1	W08F4.3	W08F4.3
ENSG00000162813	BPNT1	tag-231	tag-231
ENSG00000177479	ARIH2	T12E12.1	T12E12.1		Potential E3 ubiquitin-protein ligase ariadne-2 [Source:UniProtKB/Swiss-Prot;Acc:Q22431]
ENSG00000122565, ENSG00000108468, ENSG00000094916	CBX1, CBX3, CBX5	hpl-2, hpl-1	hpl-2	CBX3	Chromo-domain protein; HP1 Like (Heterochromatin protein) [Source:UniProtKB/TrEMBL;Acc:G5EDE2]
ENSG00000087586, ENSG00000178999, ENSG00000105146	AURKA, AURKC, AURKB	air-2	air-2		Aurora/IPL1-related protein kinase 2 [Source:UniProtKB/Swiss-Prot;Acc:O01427]
ENSG00000141748, ENSG00000162980, ENSG00000165997	ARL5B, ARL5C, ARL5A	arl-5	arl-5	ARL5B, ARL5A	ADP-ribosylation factor-like protein 5 [Source:UniProtKB/Swiss-Prot;Acc:P34212]
ENSG00000132612, ENSG00000119541	VPS4B, VPS4A	vps-4	vps-4	VPS4B	Related to yeast Vacuolar Protein Sorting factor [Source:UniProtKB/TrEMBL;Acc:Q9BL83]
ENSG00000149554	CHEK1	Y43D4A.6, chk-1, R02C2.1, kin-34, kin-33, R02C2.6	chk-1	CHEK1
ENSG00000112237	CCNC	cic-1	cic-1		Cyclin-C [Source:UniProtKB/Swiss-Prot;Acc:Q9TYP2]
ENSG00000203668, ENSG00000188419	CHM, CHML	rep-1	rep-1	CHM	Rab Escort Protein homolog [Source:UniProtKB/TrEMBL;Acc:H2L0G6]
ENSG00000119878	CRIPT	C36B1.14	C36B1.14
ENSG00000173406, ENSG00000153071	DAB1, DAB2	dab-1	dab-1	DAB1	DAB (Drosophila disabled) homolog [Source:UniProtKB/TrEMBL;Acc:A5JYR4]
ENSG00000085274, ENSG00000112365, ENSG00000116809	MYNN, ZBTB24, ZBTB17	eor-1	eor-1		EOR-1 [Source:UniProtKB/TrEMBL;Acc:G5EDU4]
ENSG00000168818	STX18	syx-18	syx-18	STX18	SYntaXin [Source:UniProtKB/TrEMBL;Acc:O76413]
ENSG00000158552, ENSG00000178381	ZFAND2B, ZFAND2A	aip-1	aip-1		Arsenite Inducible Protein [Source:UniProtKB/TrEMBL;Acc:Q9XUW8]
ENSG00000133083, ENSG00000130413, ENSG00000170390, ENSG00000163482	STK36, DCLK1, DCLK2, STK33	F32D8.1, air-1, zyg-8	zyg-8
ENSG00000110583	NAA40	Y38A10A.7	Y38A10A.7
ENSG00000231167, ENSG00000187772, ENSG00000065978, ENSG00000006047, ENSG00000131914, ENSG00000060138	LIN28A, YBX2, LIN28B, YBX1P2, YBX1, YBX3	cey-3, cey-2, lin-28, cey-1, cey-4	lin-28	LIN28B	C. Elegans Y-box [Source:UniProtKB/TrEMBL;Acc:P91398]
ENSG00000160799	CCDC12	Y69A2AR.21	Y69A2AR.21
ENSG00000170430	MGMT	agt-1	agt-1		AlkylGuanine DNA alkylTransferase [Source:UniProtKB/TrEMBL;Acc:Q2HQK2]
ENSG00000118515, ENSG00000175634, ENSG00000105221, ENSG00000108443, ENSG00000104205, ENSG00000117020, ENSG00000101049, ENSG00000142208	AKT2, SGK3, SGK1, AKT3, AKT1, RPS6KB1, SGK2, RPS6KB2	sgk-1, akt-2, akt-1, rsks-1	akt-1	SGK3, AKT2, AKT3	Serine/threonine-protein kinase sgk-1 [Source:UniProtKB/Swiss-Prot;Acc:Q2PJ68]
ENSG00000254685	FPGT	K03H1.13	K03H1.13	FPGT
ENSG00000214857, ENSG00000127922	SHFM1P1, SHFM1	dss-1	dss-1		Probable 26S proteasome complex subunit dss-1 [Source:UniProtKB/Swiss-Prot;Acc:Q95Y72]
ENSG00000149136	SSRP1	hmg-3, hmg-4	hmg-4, hmg-3		FACT complex subunit ssrp1-B [Source:UniProtKB/Swiss-Prot;Acc:O01683]
ENSG00000166938, ENSG00000083520	DIS3, DIS3L	dis-3	dis-3	DIS3	Probable exosome complex exonuclease RRP44 [Source:UniProtKB/Swiss-Prot;Acc:Q17632]
ENSG00000164104, ENSG00000124097, ENSG00000189403, ENSG00000029993	HMGB3, HMGB1P1, HMGB2, HMGB1	hmg-1.2	hmg-1.2	HMGB3, HMGB1, HMGB2	High mobility group protein 1.2 [Source:UniProtKB/Swiss-Prot;Acc:Q09390]
ENSG00000102890, ENSG00000062598, ENSG00000155849	ELMO3, ELMO1, ELMO2	ced-12	ced-12		Cell death abnormality protein 12 [Source:UniProtKB/Swiss-Prot;Acc:Q8STE5]
ENSG00000183765	CHEK2	chk-2, T08D2.7	chk-2, T08D2.7		Serine/threonine-protein kinase chk-2 [Source:UniProtKB/Swiss-Prot;Acc:Q9U1Y5]
ENSG00000102796	DHRS12	dhs-1	dhs-1		DeHydrogenases, Short chain [Source:UniProtKB/TrEMBL;Acc:P91013]
ENSG00000010292	NCAPD2	dpy-28	dpy-28	NCAPD2	Condensin complex subunit 1 [Source:UniProtKB/Swiss-Prot;Acc:Q9U2M1]
ENSG00000176248	ANAPC2	apc-2	apc-2		Anaphase-promoting complex subunit 2 [Source:UniProtKB/Swiss-Prot;Acc:P34514]
ENSG00000105258	POLR2I	rpb-9	rpb-9		DNA-directed RNA polymerase subunit [Source:UniProtKB/TrEMBL;Acc:Q965S0]
ENSG00000102893	PHKB	Y67D8A.2	Y67D8A.2
ENSG00000175203	DCTN2	dnc-2	dnc-2		Probable dynactin subunit 2 [Source:UniProtKB/Swiss-Prot;Acc:Q09248]
ENSG00000166507, ENSG00000164100, ENSG00000138653, ENSG00000175818, ENSG00000070614	NDST2, NDST4, NDST1, NDST3	hst-1	hst-1		Bifunctional heparan sulfate N-deacetylase/N-sulfotransferase 1 Heparan sulfate N-deacetylase 1 Heparan sulfate N-sulfotransferase 1 [Source:UniProtKB/Swiss-Prot;Acc:Q966W3]
ENSG00000184481, ENSG00000150907, ENSG00000204060, ENSG00000118689	FOXO3, FOXO4, FOXO1, FOXO6	daf-16	daf-16	FOXO3, FOXO1	Forkhead box protein O [Source:UniProtKB/Swiss-Prot;Acc:O16850]
ENSG00000102878, ENSG00000025156, ENSG00000185122	HSF4, HSF2, HSF1	hsf-1	hsf-1	HSF2	Heat Shock Factor; Heat shock transcription factor 1 [Source:UniProtKB/TrEMBL;Acc:G5EFT5]
ENSG00000214026	MRPL23	mrpl-23	mrpl-23		Probable 39S ribosomal protein L23, mitochondrial [Source:UniProtKB/Swiss-Prot;Acc:Q9GYS9]
ENSG00000141564	RPTOR	daf-15	daf-15		DAF-15 [Source:UniProtKB/TrEMBL;Acc:Q68TI8]
ENSG00000138604	GLCE	hse-5	hse-5	GLCE	D-glucuronyl C5-epimerase [Source:UniProtKB/Swiss-Prot;Acc:P46555]
ENSG00000110367, ENSG00000269612	DDX6	cgh-1	cgh-1	DDX6	ATP-dependent RNA helicase cgh-1 [Source:UniProtKB/Swiss-Prot;Acc:Q95YF3]
ENSG00000163811	WDR43	T10B5.3	T10B5.3	WDR43
ENSG00000128641, ENSG00000166866, ENSG00000142347, ENSG00000136286, ENSG00000197879, ENSG00000157483, ENSG00000176658	MYO1C, MYO1F, MYO1E, MYO1D, MYO1A, MYO1G, MYO1B	hum-1, hum-5	hum-1	MYO1E	Heavy chain, Unconventional Myosin [Source:UniProtKB/TrEMBL;Acc:Q19901]
ENSG00000135093	USP30	Y67D2.2	Y67D2.2		Ubiquitin carboxyl-terminal hydrolase [Source:UniProtKB/TrEMBL;Acc:Q9BKQ6]
ENSG00000086758, ENSG00000268980	HUWE1	eel-1	eel-1		Enhancer of EfL-1 mutant phenotype [Source:UniProtKB/TrEMBL;Acc:U4PES6]
ENSG00000099381, ENSG00000139718	SETD1B, SETD1A	set-2	set-2		Histone-lysine N-methyltransferase set-2 [Source:UniProtKB/Swiss-Prot;Acc:Q18221]
ENSG00000198563, ENSG00000229496, ENSG00000215425, ENSG00000235439, ENSG00000225073, ENSG00000225859, ENSG00000230624, ENSG00000237889, ENSG00000123136	DDX39A, DDX39B	hel-1	hel-1		Spliceosome RNA helicase DDX39B homolog [Source:UniProtKB/Swiss-Prot;Acc:Q18212]
ENSG00000112212, ENSG00000100300	TSPO2, TSPO	C41G7.9	C41G7.9
ENSG00000135503, ENSG00000115170, ENSG00000106799, ENSG00000123612	ACVR1C, TGFBR1, ACVR1B, ACVR1	daf-1	daf-1	ACVR1B	Cell surface receptor daf-1 [Source:UniProtKB/Swiss-Prot;Acc:P20792]
ENSG00000213619	NDUFS3	nuo-2	nuo-2		NADH Ubiquinone Oxidoreductase [Source:UniProtKB/TrEMBL;Acc:Q86NC2]
ENSG00000172613, ENSG00000151164	RAD9B, RAD9A	hpr-9	hpr-9		Homolog of S. Pombe Rad [Source:UniProtKB/TrEMBL;Acc:Q95Q27]
ENSG00000160193	WDR4	Y102E9.2	Y102E9.2
ENSG00000174669, ENSG00000112759, ENSG00000198246	SLC29A2, SLC29A3, SLC29A1	F16H11.3, C47A4.2, F44D12.9, ent-1, ent-3, ent-2	ent-1		Equilibrative Nucleoside Transporter; Equilibrative nucleoside transporter 1 [Source:UniProtKB/TrEMBL;Acc:G5EDJ3]
ENSG00000131013	PPIL4	sig-7	sig-7		Peptidyl-prolyl cis-trans isomerase sig-7 [Source:UniProtKB/Swiss-Prot;Acc:G5EEW6]
ENSG00000144848	ATG3	atg-3	atg-3		AuTophaGy (Yeast Atg homolog) [Source:UniProtKB/TrEMBL;Acc:U4PRD2]
ENSG00000085832, ENSG00000127527	EPS15L1, EPS15	ehs-1	ehs-1		EHS-1; Eps15 (Endocytosis protein) Homologous Sequence [Source:UniProtKB/TrEMBL;Acc:Q9BIF4]
ENSG00000138346	DNA2	dna-2	dna-2		Yeast DNA helicase/endonuclease family [Source:UniProtKB/TrEMBL;Acc:Q9U3F2]
ENSG00000159409, ENSG00000140488, ENSG00000149187, ENSG00000101489, ENSG00000048740, ENSG00000161082	CELF3, CELF2, CELF1, CELF4, CELF5, CELF6	etr-1, unc-75	etr-1		ELAV-Type RNA binding-protein family; ELAV-type RNA binding protein variant E [Source:UniProtKB/TrEMBL;Acc:A7KQE9]
ENSG00000173960, ENSG00000088833, ENSG00000215114	UBXN2A, NSFL1C, UBXN2B	ubxn-2	ubxn-2	UBXN2A, UBXN2B	UBX-containing protein in Nematodes [Source:UniProtKB/TrEMBL;Acc:Q86DD7]
ENSG00000126953, ENSG00000150779	TIMM8B, TIMM8A	ddp-1	ddp-1	TIMM8A	Mitochondrial import inner membrane translocase subunit Tim8 [Source:UniProtKB/Swiss-Prot;Acc:Q9N408]
ENSG00000129351, ENSG00000056097, ENSG00000165209, ENSG00000105278	ZFR2, ILF3, ZFR, STRBP	Y95B8A.8	Y95B8A.8	STRBP
ENSG00000110011	DNAJC4	dnj-4	dnj-4		DNaJ domain (Prokaryotic heat shock protein) [Source:UniProtKB/TrEMBL;Acc:P91014]
ENSG00000196544	BORCS6	Y37E11B.3	Y37E11B.3
ENSG00000269384, ENSG00000077935, ENSG00000072501	SMC1B, SMC1A	him-1	him-1	SMC1B, SMC1A	Structural maintenance of chromosomes protein 1 [Source:UniProtKB/Swiss-Prot;Acc:O01789]
ENSG00000142207	URB1	T05H4.10	T05H4.10
ENSG00000143228	NUF2	him-10	him-10	NUF2	Kinetochore protein Nuf2 homolog [Source:UniProtKB/Swiss-Prot;Acc:Q21952]
ENSG00000170464, ENSG00000148719, ENSG00000164031	DNAJB14, DNAJC18, DNAJB12	dnj-1	dnj-1	DNAJC18	DnaJ homolog subfamily B member 1 [Source:UniProtKB/Swiss-Prot;Acc:Q17438]
ENSG00000150760, ENSG00000088538, ENSG00000128512, ENSG00000147459, ENSG00000134516	DOCK3, DOCK5, DOCK4, DOCK2, DOCK1	ced-5	ced-5	DOCK2	CED-5 [Source:UniProtKB/TrEMBL;Acc:G5EEN3]
ENSG00000172432, ENSG00000100226	GTPBP2, GTPBP1	cgp-1, T04H1.2	cgp-1	GTPBP2	GTP-binding protein cgp-1 [Source:UniProtKB/Swiss-Prot;Acc:Q18905]
ENSG00000176108	CHMP6	vps-20	vps-20		Related to yeast Vacuolar Protein Sorting factor [Source:UniProtKB/TrEMBL;Acc:Q9BL60]
ENSG00000004700, ENSG00000197299, ENSG00000165392	BLM, WRN, RECQL	him-6, wrn-1, K02F3.12	him-6	WRN	Bloom syndrome protein homolog [Source:UniProtKB/Swiss-Prot;Acc:O18017]
ENSG00000143452, ENSG00000176635	HORMAD2, HORMAD1	htp-1, htp-2, him-3	htp-1, htp-2, him-3		Him-Three Paralog [Source:UniProtKB/TrEMBL;Acc:Q20305]
ENSG00000152430, ENSG00000205916, ENSG00000205944, ENSG00000187191, ENSG00000188120, ENSG00000092345	DAZ2, DAZ1, DAZ4, DAZ3, DAZL, BOLL	daz-1	daz-1		DAZ protein 1 [Source:UniProtKB/Swiss-Prot;Acc:Q20870]
ENSG00000111880	RNGTT	cel-1	cel-1		mRNA-capping enzyme Polynucleotide 5'-triphosphatase mRNA guanylyltransferase [Source:UniProtKB/Swiss-Prot;Acc:Q17607]
ENSG00000144635, ENSG00000135720	DYNC1LI1, DYNC1LI2	dli-1	dli-1	DYNC1LI1, DYNC1LI2	Dynein Light Intermediate chain [Source:UniProtKB/TrEMBL;Acc:G5ECK7]
ENSG00000189060, ENSG00000124610, ENSG00000168298, ENSG00000184357, ENSG00000178804, ENSG00000187837, ENSG00000124575, ENSG00000187475, ENSG00000184897	H1FX, HIST1H1A, H1FOO, HIST1H1B, H1F0, HIST1H1C, HIST1H1D, HIST1H1T, HIST1H1E	hil-5, hil-1, hil-6, hil-2, hil-4, hil-3, his-24	hil-5, hil-2, hil-4	H1F0	Histone H1.5 [Source:UniProtKB/Swiss-Prot;Acc:O01833]
ENSG00000148606, ENSG00000181222	POLR3A, POLR2A	rpc-1, ama-1	ama-1		DNA-directed RNA polymerase subunit [Source:UniProtKB/TrEMBL;Acc:Q18566]
ENSG00000161800	RACGAP1	cyk-4	cyk-4		CYtoKinesis defect [Source:UniProtKB/TrEMBL;Acc:Q9XUS9]
ENSG00000152465, ENSG00000136448	NMT1, NMT2	nmt-1	nmt-1		Probable glycylpeptide N-tetradecanoyltransferase [Source:UniProtKB/Swiss-Prot;Acc:P46548]
ENSG00000175766, ENSG00000151247	EIF4E1B, EIF4E	ife-3, ife-1, ife-5, ife-2	ife-1, ife-3	EIF4E	Eukaryotic translation initiation factor 4E-3 [Source:UniProtKB/Swiss-Prot;Acc:O61955]
ENSG00000079785	DDX1	Y55F3BR.1	Y55F3BR.1
ENSG00000147813	NAPRT	Y54G2A.17	Y54G2A.17
ENSG00000149503	INCENP	icp-1	icp-1		InCenP homolog; Incenp-like protein ICP-1 [Source:UniProtKB/TrEMBL;Acc:G5EE37]
ENSG00000171960	PPIH	cyn-11	cyn-11		Peptidyl-prolyl cis-trans isomerase 11 [Source:UniProtKB/Swiss-Prot;Acc:P52018]

## Sheet: FBF OO 25° vs Lin pum
Human ENSG	Human gene symbol	Worm public name	FBF targets (Worm public name)	PUM targets (Human gene symbol)	Gene description
ENSG00000243668, ENSG00000106610, ENSG00000174353, ENSG00000205583, ENSG00000160828, ENSG00000118007, ENSG00000066923, ENSG00000101972	STAG1, STAG2, STAG3L3, STAG3L4, STAG3L1, STAG3	scc-3	scc-3	STAG2	Cohesin subunit scc-3 [Source:UniProtKB/Swiss-Prot;Acc:Q19555]
ENSG00000197321	SVIL	viln-1	viln-1		VILliN related [Source:UniProtKB/TrEMBL;Acc:P91041]
ENSG00000099917	MED15	sel-8, mdt-15	sel-8
ENSG00000198952, ENSG00000116698, ENSG00000070366	SMG5, SMG6, SMG7	smg-6	smg-6		Suppressor with Morphological effect on Genitalia [Source:UniProtKB/TrEMBL;Acc:Q9BL69]
ENSG00000186642	PDE2A	pde-2	pde-2		Probable 3',5'-cyclic phosphodiesterase pde-2 [Source:UniProtKB/Swiss-Prot;Acc:P30645]
ENSG00000130706	ADRM1	C56G2.7	C56G2.7
ENSG00000108055	SMC3	smc-3	smc-3	SMC3	Structural maintenance of chromosomes protein 3 [Source:UniProtKB/Swiss-Prot;Acc:B2FDA8]
ENSG00000221869, ENSG00000092067	CEBPD, CEBPE	cebp-1, zip-4	zip-4		C/EBP (CCAAT/enhancer-binding protein) homolog [Source:UniProtKB/TrEMBL;Acc:Q18909]
ENSG00000100603	SNW1	skp-1	skp-1		mammalian SKIP (Ski interacting protein) homolog [Source:RefSeq peptide;Acc:NP_505950]
ENSG00000123405, ENSG00000082641, ENSG00000116044, ENSG00000050344	NFE2L1, NFE2, NFE2L2, NFE2L3	sknr-1, skn-1	skn-1		SKN Related [Source:UniProtKB/TrEMBL;Acc:A0A0M7REQ4]
ENSG00000149577, ENSG00000072858	SIDT2, SIDT1	tag-130, sid-1	sid-1		Systemic RNA interference defective protein 1 [Source:UniProtKB/Swiss-Prot;Acc:Q9GZC8]
ENSG00000155744, ENSG00000122591	FAM126A, FAM126B	D1069.3	D1069.3
ENSG00000134375, ENSG00000267823, ENSG00000126768	TIMM17A, TIMM17B	E04A4.5, D2096.1	D2096.1
ENSG00000119396	RAB14	rab-14	rab-14	RAB14	RAB family [Source:UniProtKB/TrEMBL;Acc:Q93874]
ENSG00000113615, ENSG00000138802	SEC24A, SEC24B	sec-24.2	sec-24.2		Yeast SEC homolog [Source:UniProtKB/TrEMBL;Acc:Q23368]
ENSG00000138385	SSB	C44E4.4	C44E4.4	SSB
ENSG00000150961, ENSG00000176986	SEC24D, SEC24C	sec-24.1	sec-24.1		Yeast SEC homolog [Source:UniProtKB/TrEMBL;Acc:Q19371]
ENSG00000112685	EXOC2	sec-5	sec-5		Exocyst complex component 2 [Source:UniProtKB/Swiss-Prot;Acc:Q22706]
ENSG00000134146	DPH6	E01A2.5	E01A2.5		Diphthine--ammonia ligase [Source:UniProtKB/TrEMBL;Acc:Q966L4]
ENSG00000177646, ENSG00000072778	ACADVL, ACAD9	acdh-12	acdh-12		Acyl CoA DeHydrogenase [Source:UniProtKB/TrEMBL;Acc:Q6AHQ5]
ENSG00000073910, ENSG00000075539	FRYL, FRY	sax-2	sax-2	FRY	Sensory AXon guidance [Source:UniProtKB/TrEMBL;Acc:Q5DX48]
ENSG00000132356, ENSG00000162409, ENSG00000174672, ENSG00000160469	BRSK2, PRKAA1, PRKAA2, BRSK1	aak-2, sad-1, aak-1	aak-1	BRSK2	5'-AMP-activated protein kinase catalytic subunit alpha-2 [Source:UniProtKB/Swiss-Prot;Acc:Q95ZQ4]
ENSG00000110711, ENSG00000129221	AIP, AIPL1	C56C10.10	C56C10.10
ENSG00000143434, ENSG00000137872, ENSG00000092421, ENSG00000167680	SEMA6C, SEMA6A, SEMA6B, SEMA6D	smp-1	smp-1	SEMA6D	Semaphorin-1A [Source:UniProtKB/Swiss-Prot;Acc:Q17330]
ENSG00000139190, ENSG00000179036, ENSG00000168899, ENSG00000118640, ENSG00000049245, ENSG00000117533, ENSG00000220205	VAMP1, VAMP8, VAMP4, VAMP2, VAMP5, VAMP3	snb-2, Y69A2AR.6, snb-1, B0513.9	snb-1	VAMP2	SyNaptoBrevin related [Source:UniProtKB/TrEMBL;Acc:Q19767]
ENSG00000167962	ZNF598	C52E12.1	C52E12.1
ENSG00000155304	HSPA13	stc-1	stc-1		STCH (Truncated HSP) family [Source:UniProtKB/TrEMBL;Acc:Q20752]
ENSG00000122965	RBM19	rbd-1	rbd-1		RBD (RNA binding domain) protein [Source:UniProtKB/TrEMBL;Acc:A0A061AJ27]
ENSG00000182747, ENSG00000130958, ENSG00000116704	SLC35D3, SLC35D2, SLC35D1	sqv-7	sqv-7		UDP-sugar transporter sqv-7 [Source:UniProtKB/Swiss-Prot;Acc:Q18779]
ENSG00000115652	UXS1	sqv-1	sqv-1		SQuashed Vulva; UDP-glucuronic acid decarboxylase [Source:UniProtKB/TrEMBL;Acc:G5EF65]
ENSG00000100294	MCAT	C50D2.9	C50D2.9
ENSG00000176715	ACSF3	acs-11, acs-21	acs-11		Fatty Acid CoA Synthetase family [Source:UniProtKB/TrEMBL;Acc:Q20264]
ENSG00000196235	SUPT5H	spt-5	spt-5		Transcription elongation factor SPT5 [Source:UniProtKB/Swiss-Prot;Acc:Q21338]
ENSG00000213246	SUPT4H1	spt-4	spt-4		Transcription elongation factor SPT4 [Source:UniProtKB/Swiss-Prot;Acc:Q9TZ93]
ENSG00000006459, ENSG00000197724, ENSG00000172943	PHF8, KDM7A, PHF2	jmjd-1.1, jmjd-1.2	jmjd-1.2		JuMonJi (Transcription factor) Domain protein [Source:UniProtKB/TrEMBL;Acc:Q20367]
ENSG00000167771, ENSG00000117625, ENSG00000089902	RCOR1, RCOR3, RCOR2	spr-1, Y74C9A.4	spr-1		REST corepressor spr-1 [Source:UniProtKB/Swiss-Prot;Acc:Q18919]
ENSG00000153879	CEBPG	cebp-2	cebp-2		C/EBP (CCAAT/enhancer-binding protein) homolog [Source:UniProtKB/TrEMBL;Acc:Q8IG69]
ENSG00000135250, ENSG00000096063, ENSG00000184343	SRPK1, SRPK3, SRPK2	spk-1	spk-1		Serine/threonine-protein kinase spk-1 [Source:UniProtKB/Swiss-Prot;Acc:Q03563]
ENSG00000136758, ENSG00000141385	AFG3L2, YME1L1	Y73B3A.21, spg-7, ymel-1	ymel-1
ENSG00000198901	PRC1	spd-1	spd-1		SPD-1 [Source:UniProtKB/TrEMBL;Acc:G5ED58]
ENSG00000159322	ADPGK	C50D2.7	C50D2.7		Probable ADP-dependent glucokinase [Source:UniProtKB/Swiss-Prot;Acc:Q86S40]
ENSG00000108848	LUC7L3	Y119D3B.12, C50D2.8	Y119D3B.12
ENSG00000018189, ENSG00000177548, ENSG00000176783, ENSG00000204130, ENSG00000029725	RUFY3, RUFY1, RUFY2, RABEP2, RABEP1	rabn-5	rabn-5	RUFY3	RABaptiN (Rab effector) [Source:UniProtKB/TrEMBL;Acc:Q19088]
ENSG00000117139, ENSG00000012817, ENSG00000126012, ENSG00000008083, ENSG00000073614	KDM5D, KDM5B, JARID2, KDM5C, KDM5A	rbr-2	rbr-2	KDM5C, JARID2	Lysine-specific demethylase rbr-2 [Source:UniProtKB/Swiss-Prot;Acc:Q23541]
ENSG00000131873, ENSG00000198108	CHSY1, CHSY3	sqv-5	sqv-5	CHSY1	Chondroitin sulfate synthase sqv-5 [Source:UniProtKB/Swiss-Prot;Acc:Q7Z1Z1]
ENSG00000118197, ENSG00000174243	DDX59, DDX23	ddx-23	ddx-23		DEAD boX helicase homolog [Source:UniProtKB/TrEMBL;Acc:Q95QN2]
ENSG00000123992	DNPEP	dnpp-1	dnpp-1		Aspartyl aminopeptidase [Source:UniProtKB/Swiss-Prot;Acc:Q19087]
ENSG00000111785, ENSG00000177963	RIC8B, RIC8A	ric-8	ric-8		Synembryn [Source:UniProtKB/Swiss-Prot;Acc:Q9GSX9]
ENSG00000135829, ENSG00000132153, ENSG00000067248, ENSG00000174953, ENSG00000163214, ENSG00000047188, ENSG00000156414	DHX29, TDRD9, DHX36, DHX30, YTHDC2, DHX9, DHX57	F52B5.3, rha-1	F52B5.3	DHX36
ENSG00000135473	PAN2	panl-2	panl-2		PAN (PolyA-specific riboNucLease) subunit [Source:RefSeq peptide;Acc:NP_498519]
ENSG00000108264, ENSG00000173011	TADA2B	ada-2	ada-2		ADA (Histone acetyltransferase complex) subunit [Source:UniProtKB/TrEMBL;Acc:Q5DX44]
ENSG00000180182	MED14	rgr-1	rgr-1		Mediator of RNA polymerase II transcription subunit 14 [Source:UniProtKB/Swiss-Prot;Acc:Q03570]
ENSG00000163918	RFC4	rfc-4	rfc-4		Replication factor C subunit 4 [Source:UniProtKB/Swiss-Prot;Acc:P53016]
ENSG00000133119	RFC3	rfc-3	rfc-3		RFC (DNA replication factor) family [Source:UniProtKB/TrEMBL;Acc:Q18547]
ENSG00000108469	RECQL5	rcq-5	rcq-5		ReCQ DNA helicase family [Source:UniProtKB/TrEMBL;Acc:Q19046]
ENSG00000118873	RAB3GAP2	rbg-2	rbg-2		Rab3 GTPase-activating protein regulatory subunit [Source:UniProtKB/Swiss-Prot;Acc:Q22670]
ENSG00000123728, ENSG00000181467, ENSG00000125249	RAP2B, RAP2C, RAP2A	rap-2	rap-2		RAP homolog (Vertebrate Rap GTPase family) [Source:UniProtKB/TrEMBL;Acc:O17599]
ENSG00000101557	USP14	usp-14	usp-14		Ubiquitin carboxyl-terminal hydrolase 14 [Source:UniProtKB/Swiss-Prot;Acc:Q17361]
ENSG00000135972	MRPS9	mrps-9	mrps-9		Probable 40S ribosomal protein S9, mitochondrial [Source:UniProtKB/Swiss-Prot;Acc:P34388]
ENSG00000130024	PHF10	phf-10	phf-10		PHd Finger family [Source:UniProtKB/TrEMBL;Acc:Q2A949]
ENSG00000180198, SNHG3-RCC1	RCC1	ran-3	ran-3		Regulator of chromosome condensation [Source:UniProtKB/Swiss-Prot;Acc:Q18211]
ENSG00000100401	RANGAP1	ran-2	ran-2		Ran GTPase-activating protein 2 [Source:UniProtKB/Swiss-Prot;Acc:P34342]
ENSG00000182150, ENSG00000085999, ENSG00000197275	ERCC6L2, RAD54L, RAD54B	rad-54, Y116A8C.13	rad-54, Y116A8C.13
ENSG00000185379, ENSG00000051180, ENSG00000100206, ENSG00000182185, ENSG00000108384	RAD51B, DMC1, RAD51C, RAD51D, RAD51	rad-51	rad-51		RAD51 short isoform; RecA/Rad51/Dmc1-like protein [Source:UniProtKB/TrEMBL;Acc:G5EGG8]
ENSG00000182197, ENSG00000158008	EXT1, EXTL1	rib-1	rib-1		Exostosin-1 homolog [Source:UniProtKB/Swiss-Prot;Acc:O01704]
ENSG00000069188, ENSG00000146555	SDK2, SDK1	rig-4	rig-4		Protein sidekick homolog [Source:UniProtKB/Swiss-Prot;Acc:Q9N3X8]
ENSG00000144785, ENSG00000146910, ENSG00000257727	CNPY2, CNPY1, RP11-977G19.10	F01F1.15	F01F1.15
ENSG00000155189	AGPAT5	acl-11	acl-11		ACyLtransferase-like [Source:UniProtKB/TrEMBL;Acc:Q95R12]
ENSG00000124562	SNRPC	F08B4.7	F08B4.7		U1 small nuclear ribonucleoprotein C [Source:UniProtKB/Swiss-Prot;Acc:P90815]
ENSG00000177954, ENSG00000227081, ENSG00000185088	RP11-543P15.1, RPS27L, RPS27	rps-27	rps-27		40S ribosomal protein S27 [Source:UniProtKB/Swiss-Prot;Acc:Q9TXP0]
ENSG00000077312, ENSG00000125870	SNRPB2, SNRPA	rnp-3, rnp-2	rnp-3		RNP (RRM RNA binding domain) containing [Source:UniProtKB/TrEMBL;Acc:U4PBX2]
ENSG00000162869	PPP1R21	F33E11.3	F33E11.3
ENSG00000214255, ENSG00000228981, ENSG00000196183, ENSG00000197149, ENSG00000140988	RPS2P6, RPS2P4, RP11-364L4.1, RP11-452G18.2, RPS2	rps-2	rps-2		40S ribosomal protein S2 [Source:UniProtKB/Swiss-Prot;Acc:P51403]
ENSG00000143093, ENSG00000128578	STRIP1, STRIP2	farl-11	farl-11		FAR (Factor ARrest) Like [Source:UniProtKB/TrEMBL;Acc:A0A1D3PD01]
ENSG00000108671	PSMD11	rpn-6.2, rpn-6.1	rpn-6.1		Probable 26S proteasome regulatory subunit rpn-6.2 [Source:UniProtKB/Swiss-Prot;Acc:P34481]
ENSG00000132383	RPA1	rpa-1	rpa-1		Probable replication factor A 73 kDa subunit [Source:UniProtKB/Swiss-Prot;Acc:Q19537]
ENSG00000160294	MCM3AP	F20D12.2	F20D12.2
ENSG00000140995	DEF8	F20H11.1	F20H11.1		Differentially expressed in FDCP 8 homolog [Source:UniProtKB/Swiss-Prot;Acc:O01738]
ENSG00000122008	POLK	polk-1	polk-1		DNA polymerase kappa [Source:UniProtKB/Swiss-Prot;Acc:P34409]
ENSG00000185246	PRPF39	F25B4.5	F25B4.5
ENSG00000116747	TROVE2	rop-1	rop-1		60 kDa SS-A/Ro ribonucleoprotein homolog [Source:UniProtKB/Swiss-Prot;Acc:Q27274]
ENSG00000235183, ENSG00000140319	RP11-613C6.4, SRP14	F25G6.9, F25G6.8	F25G6.9, F25G6.8
ENSG00000163882	POLR2H	rpb-8	rpb-8		Probable DNA-directed RNA polymerases I, II, and III subunit RPABC3 [Source:UniProtKB/Swiss-Prot;Acc:Q19826]
ENSG00000165934	CPSF2	cpsf-2	cpsf-2		Probable cleavage and polyadenylation specificity factor subunit 2 [Source:UniProtKB/Swiss-Prot;Acc:O17403]
ENSG00000183574, ENSG00000204308, ENSG00000206254, ENSG00000138942	RNF5, RNF185	rnf-5	rnf-5		RING finger protein 5 [Source:UniProtKB/Swiss-Prot;Acc:Q09463]
ENSG00000241519, ENSG00000198833	UBE2J1	ubc-6	ubc-6		UBiquitin Conjugating enzyme [Source:UniProtKB/TrEMBL;Acc:Q18931]
ENSG00000143486	EIF2D	C25H3.4	C25H3.4
ENSG00000182473	EXOC7	exoc-7	exoc-7		EXOCyst component [Source:UniProtKB/TrEMBL;Acc:P91149]
ENSG00000065609, ENSG00000073921	PICALM, SNAP91	unc-11	unc-11	PICALM, SNAP91	Phosphatidylinositol-binding clathrin assembly protein unc-11 [Source:UniProtKB/Swiss-Prot;Acc:Q9XZI6]
ENSG00000138468, ENSG00000112701	SENP7, SENP6	ulp-4, ulp-2	ulp-4, ulp-2	SENP6	Ubiquitin-like protease 4 [Source:UniProtKB/Swiss-Prot;Acc:Q09275]
ENSG00000163904, ENSG00000119231, ENSG00000079387, ENSG00000161956	SENP5, SENP1, SENP3, SENP2	ulp-1	ulp-1		Sentrin-specific protease [Source:UniProtKB/Swiss-Prot;Acc:Q09353]
ENSG00000070010	UFD1L	ufd-1	ufd-1		Ubiquitin fusion degradation protein 1 homolog [Source:UniProtKB/Swiss-Prot;Acc:Q19584]
ENSG00000244687, ENSG00000240849, ENSG00000124208, ENSG00000169139	TMEM189, UBE2V1, TMEM189-UBE2V1, UBE2V2	Y53C10A.5, uev-1	uev-1
ENSG00000153291	SLC25A27	ucp-4	ucp-4		UnCoupling Protein (Mitochondrial substrate carrier) [Source:UniProtKB/TrEMBL;Acc:O01883]
ENSG00000158560, ENSG00000162643, ENSG00000077380, ENSG00000152763, ENSG00000171595, ENSG00000119333, ENSG00000122735	DNAI2, WDR63, WDR34, DNAI1, DYNC1I1, DYNC1I2, WDR78	dyci-1	dyci-1	DYNC1I2	DYnein Chain, light Intermediate [Source:UniProtKB/TrEMBL;Acc:O45087]
ENSG00000155275	TRMT44	C23G10.7	C23G10.7		Probable tRNA (uracil-O(2)-)-methyltransferase [Source:UniProtKB/Swiss-Prot;Acc:Q45EK7]
ENSG00000104343	UBE2W	ubc-16	ubc-16		UBiquitin Conjugating enzyme [Source:UniProtKB/TrEMBL;Acc:Q9XWF6]
ENSG00000021574, ENSG00000132436, ENSG00000182263	FIGNL1, SPAST, FIGN	spas-1, figl-1	figl-1	SPAST	Probable spastin homolog spas-1 [Source:UniProtKB/Swiss-Prot;Acc:Q8MNV0]
ENSG00000137845	ADAM10	sup-17	sup-17	ADAM10	ADAM 10; SUPpressor [Source:UniProtKB/TrEMBL;Acc:G5EFD9]
ENSG00000061936	SFSWAP	swp-1	swp-1		Splicing factor (Suppressor of White aPricot) related [Source:UniProtKB/TrEMBL;Acc:H2KY78]
ENSG00000048707	VPS13D	C25H3.8	C25H3.8
ENSG00000144580	RQCD1	ntl-9	ntl-9		NOT-Like (Yeast CCR4/NOT complex component) [Source:UniProtKB/TrEMBL;Acc:Q18224]
ENSG00000139428	MMAB	mmab-1	mmab-1		MethylMalonic Aciduria type B homolog [Source:UniProtKB/TrEMBL;Acc:Q18218]
ENSG00000052344, ENSG00000169035, ENSG00000167751, ENSG00000172236, ENSG00000010438, ENSG00000103355, ENSG00000197253, ENSG00000204983	PRSS3, TPSB2, KLK2, PRSS33, KLK7, PRSS8, TPSAB1, PRSS1	try-1	try-1		TRYpsin-like protease [Source:UniProtKB/TrEMBL;Acc:Q23528]
ENSG00000182158, ENSG00000157613	CREB3L1, CREB3L2	crh-2	crh-2		CREB Homolog [Source:UniProtKB/TrEMBL;Acc:Q4JFH9]
ENSG00000174332, ENSG00000107249	GLIS3, GLIS1	tra-1	tra-1		Sex-determining transformer protein 1 [Source:UniProtKB/Swiss-Prot;Acc:P34708]
ENSG00000243725	TTC4	C17G10.2	C17G10.2
ENSG00000138834, ENSG00000008294	SPAG9, MAPK8IP3	unc-16	unc-16	SPAG9	JNK-interacting protein [Source:UniProtKB/Swiss-Prot;Acc:P34609]
ENSG00000177302	TOP3A	top-3	top-3		DNA topoisomerase 3 [Source:UniProtKB/Swiss-Prot;Acc:O61660]
ENSG00000078269, ENSG00000159082	SYNJ1, SYNJ2	unc-26	unc-26		Synaptojanin [Source:UniProtKB/Swiss-Prot;Acc:G5ECL2]
ENSG00000163754, ENSG00000056998, ENSG00000206159	GYG2P1, GYG1, GYG2	gyg-2, M116.2, gyg-1	gyg-2		GlYcoGenin like [Source:UniProtKB/TrEMBL;Acc:O45819]
ENSG00000182670	TTC3	C09E7.8, C09E7.7, F27B3.5, C09E7.9	C09E7.8
ENSG00000167965	MLST8	C10H11.8	C10H11.8
ENSG00000108669, ENSG00000008256, ENSG00000100055, ENSG00000105443	CYTH1, CYTH4, CYTH3, CYTH2	grp-1	grp-1	CYTH3, CYTH2	GTP exchange factor for ARFs 1 [Source:UniProtKB/Swiss-Prot;Acc:P34512]
ENSG00000095002	MSH2	msh-2	msh-2		MSH (MutS Homolog) family [Source:UniProtKB/TrEMBL;Acc:Q9TXR4]
ENSG00000166337	TAF10	taf-10	taf-10		Transcription initiation factor TFIID subunit 10 [Source:UniProtKB/TrEMBL;Acc:Q95ZS0]
ENSG00000182944, ENSG00000172660, ENSG00000089280	FUS, EWSR1	fust-1, F10E7.2	F10E7.2		FUS/TLS RNA binding protein homolog [Source:UniProtKB/TrEMBL;Acc:A0A1N7SYQ6]
ENSG00000171055, ENSG00000149557	FEZ2, FEZ1	unc-76	unc-76		UNC-76 [Source:UniProtKB/TrEMBL;Acc:Q7JNU9]
ENSG00000153130	SCOC	unc-69	unc-69		Short coiled-coil domain-containing protein UNC-69 splice variant T07A5.6b [Source:UniProtKB/TrEMBL;Acc:G5EDQ5]
ENSG00000153006	SREK1IP1	C13F10.7	C13F10.7
ENSG00000154997, ENSG00000138758, ENSG00000125354, ENSG00000164402, ENSG00000186522	SEPT6, SEPT11, SEPT8, SEPT10, SEPT14	unc-61	unc-61
ENSG00000067177, ENSG00000044446	PHKA1, PHKA2	C14B9.8	C14B9.8		Probable phosphorylase b kinase regulatory subunit alpha [Source:UniProtKB/Swiss-Prot;Acc:P34335]
ENSG00000120555, ENSG00000214765, ENSG00000184702, ENSG00000122545, ENSG00000108387, ENSG00000180096, ENSG00000168385	SEPT7, SEPT2, SEPT7P2, SEPT7P9, SEPT1, SEPT4, SEPT5	unc-59	unc-59	SEPT7
ENSG00000125166, ENSG00000120053, ENSG00000169154	GOT2, GOT1, GOT1L1	got-1.1, got-2.2, got-1.2, got-1.3, got-2.1	got-2.1
ENSG00000067141, ENSG00000187323	NEO1, DCC	unc-40	unc-40	NEO1	Unc-40 protein [Source:UniProtKB/TrEMBL;Acc:G5EF96]
ENSG00000235418, ENSG00000196781, ENSG00000104964, ENSG00000106829, ENSG00000104953, ENSG00000065717, ENSG00000140332	TLE4, AES, TLE3, TLE6, TLE1, TLE2	unc-37	unc-37		Transcription factor unc-37 [Source:UniProtKB/Swiss-Prot;Acc:O02482]
ENSG00000033627, ENSG00000185344, ENSG00000105929, ENSG00000110719	ATP6V0A2, ATP6V0A1, TCIRG1, ATP6V0A4	unc-32, vha-5, vha-6, vha-7	vha-7		Probable V-type proton ATPase 116 kDa subunit a [Source:UniProtKB/Swiss-Prot;Acc:P30628]
ENSG00000121988, ENSG00000138375	ZRANB3, SMARCAL1	C16A3.1	C16A3.1
ENSG00000138111	TMEM180	C27H5.4, F28B3.5, F10E7.3	F28B3.5
ENSG00000132740	IGHMBP2	eri-7	eri-7		Enhanced RNAI (RNA interference) [Source:UniProtKB/TrEMBL;Acc:O01976]
ENSG00000162236	STX5	syx-5	syx-5		Putative syntaxin-5 [Source:UniProtKB/Swiss-Prot;Acc:Q20797]
ENSG00000092148	HECTD1	hecd-1	hecd-1		HECtD1 ubiquitin ligase homolog [Source:UniProtKB/TrEMBL;Acc:V6CJX7]
ENSG00000097046	CDC7	cdc-7	cdc-7		Cell Division Cycle related [Source:UniProtKB/TrEMBL;Acc:O01493]
ENSG00000154783, ENSG00000180263	FGD6, FGD5	tag-77	tag-77
ENSG00000123594, ENSG00000066427	ATXN3L, ATXN3	atx-3	atx-3		Ataxin-3 homolog [Source:UniProtKB/Swiss-Prot;Acc:O17850]
ENSG00000101349, ENSG00000137843, ENSG00000130669	PAK7, PAK6, PAK4	pak-2	pak-2		Serine/threonine-protein kinase pak-2 [Source:UniProtKB/Swiss-Prot;Acc:G5EFU0]
ENSG00000168906, ENSG00000151224	MAT1A, MAT2A	sams-4, sams-5, sams-1, sams-3	sams-3		Probable S-adenosylmethionine synthase 4 [Source:UniProtKB/Swiss-Prot;Acc:P50306]
ENSG00000155876, ENSG00000083750	RRAGA, RRAGB	raga-1	raga-1		RAs-related GTP-binding protein A [Source:UniProtKB/TrEMBL;Acc:Q22743]
ENSG00000173145	NOC3L	C37H5.5	C37H5.5		Nucleolar complex protein 3 homolog [Source:UniProtKB/Swiss-Prot;Acc:P91136]
ENSG00000205726, ENSG00000198399	ITSN2, ITSN1	itsn-1	itsn-1		ITSN (Intersectin) family [Source:UniProtKB/TrEMBL;Acc:E6N0W0]
ENSG00000215760, ENSG00000085231, ENSG00000187325, ENSG00000185057	TAF9BP2, AK6, TAF9B	E02H1.6, taf-9	E02H1.6		Adenylate kinase isoenzyme 6 homolog [Source:UniProtKB/Swiss-Prot;Acc:Q09527]
ENSG00000156931	VPS8	C42C1.4	C42C1.4
ENSG00000141424, ENSG00000104635, ENSG00000138821	SLC39A6, SLC39A8, SLC39A14	tag-140, Y55F3BL.2	Y55F3BL.2	SLC39A6
ENSG00000028839	TBPL1	tlf-1	tlf-1		TBP-Like Factor; TBP-like factor [Source:UniProtKB/TrEMBL;Acc:G5EC52]
ENSG00000075239, ENSG00000167315, ENSG00000111666, ENSG00000138018, ENSG00000120437, ENSG00000134255	CEPT1, ACAT1, ACAT2, ACAA2, EPT1, CHPT1	F53A2.7, T02G5.4, F54D7.2, cept-1, kat-1, Y49A3A.1, T02G5.7	T02G5.7
ENSG00000173540	GMPPB	tag-335	tag-335		Mannose-1-phosphate guanyltransferase beta [Source:UniProtKB/Swiss-Prot;Acc:A3QMC8]
ENSG00000147133, ENSG00000122728	TAF1, TAF1L	taf-1	taf-1		Transcription initiation factor TFIID subunit 1 [Source:UniProtKB/Swiss-Prot;Acc:G5EGM3]
ENSG00000100813, ENSG00000137776, ENSG00000160633, ENSG00000130254, ENSG00000164597	SAFB2, SAFB, ACIN1, COG5, SLTM	cogc-5, acin-1	cogc-5, acin-1		Conserved Oligomeric Golgi (COG) Component [Source:UniProtKB/TrEMBL;Acc:P91151]
ENSG00000047410	TPR	npp-21, syp-1	npp-21, syp-1		Nuclear Pore complex Protein [Source:UniProtKB/TrEMBL;Acc:Q5WRT9]
ENSG00000178719, ENSG00000135472, ENSG00000155957, ENSG00000135926	TMBIM4, FAIM2, GRINA, TMBIM1	tag-120, xbx-6, tmbi-4, Y42H9AR.2	xbx-6
ENSG00000196981, ENSG00000196363	WDR5B, WDR5	wdr-5.3, wdr-5.2, wdr-5.1	wdr-5.3		WD repeat-containing protein wdr-5.3 [Source:UniProtKB/Swiss-Prot;Acc:Q23256]
ENSG00000173114, ENSG00000170382, ENSG00000175928	LRRN3, LRRN2, LRRN1	tol-1	tol-1		TOLl (Drosophila) family [Source:UniProtKB/TrEMBL;Acc:Q9N5Z3]
ENSG00000114902	SPCS1	C34B2.10	C34B2.10		Probable signal peptidase complex subunit 1 [Source:UniProtKB/Swiss-Prot;Acc:O44953]
ENSG00000152683	SLC30A6	toc-1	toc-1		Similar to Transporter Of divalent Cations [Source:UniProtKB/TrEMBL;Acc:Q23281]
ENSG00000170807, ENSG00000163431, ENSG00000163380, ENSG00000138594, ENSG00000163157, ENSG00000136842, ENSG00000128872	TMOD3, LMOD3, LMOD1, TMOD1, TMOD2, TMOD4, LMOD2	tmd-2, unc-94	unc-94	TMOD2	TropoMoDulin [Source:UniProtKB/TrEMBL;Acc:H2KYK4]
ENSG00000025770	NCAPH2	kle-2	kle-2		Condensin-2 complex subunit kle-2 [Source:UniProtKB/Swiss-Prot;Acc:P34341]
ENSG00000070367	EXOC5	sec-10	sec-10		Exocyst complex component 5 [Source:UniProtKB/Swiss-Prot;Acc:Q18406]
ENSG00000134809	TIMM10	tin-10	tin-10		Mitochondrial import inner membrane translocase subunit Tim10 [Source:UniProtKB/Swiss-Prot;Acc:Q9Y0V6]
ENSG00000111602	TIMELESS	tim-1	tim-1		Protein timeless homolog [Source:UniProtKB/Swiss-Prot;Acc:G5EDN3]
ENSG00000167900	TK1	thk-1	thk-1		Thymidine kinase [Source:UniProtKB/TrEMBL;Acc:G5EEZ5]
ENSG00000115540	MOB4	C30A5.3	C30A5.3	MOB4
ENSG00000169217	CD2BP2	teg-1	teg-1		Tumorous Enhancer of Glp-1(Gf) [Source:UniProtKB/TrEMBL;Acc:Q9NAH3]
ENSG00000131462, ENSG00000037042	TUBG2, TUBG1	tbg-1	tbg-1		Tubulin gamma chain [Source:UniProtKB/Swiss-Prot;Acc:P34475]
ENSG00000083123	BCKDHB	tag-173	tag-173
ENSG00000133247, ENSG00000110066	SUV420H1, SUV420H2	set-4	set-4		Histone-lysine N-methyltransferase Suv4-20 [Source:UniProtKB/Swiss-Prot;Acc:Q09265]
ENSG00000117859	OSBPL9	obr-4	obr-4		Oxysterol-binding protein [Source:UniProtKB/TrEMBL;Acc:O01686]
ENSG00000206217, ENSG00000229802, ENSG00000224399, ENSG00000226614, ENSG00000227402, ENSG00000206288, ENSG00000112473	SLC39A7	hke-4.1, hke-4.2	hke-4.1
ENSG00000164091	WDR82	swd-2.1, swd-2.2	swd-2.1, swd-2.2	WDR82	Set1 WD40 repeat protein homolog [Source:UniProtKB/TrEMBL;Acc:Q18404]
ENSG00000110925, ENSG00000178662, ENSG00000144655	CSRNP1, CSRNP2, CSRNP3	C41D11.3	C41D11.3
ENSG00000099246	RAB18	rab-18	rab-18	RAB18	Ras-related protein Rab-18 [Source:UniProtKB/Swiss-Prot;Acc:Q8MXS1]
ENSG00000138069, ENSG00000111737, ENSG00000174903	RAB35, RAB1A, RAB1B	rab-1, rab-35	rab-35		RAB family [Source:UniProtKB/TrEMBL;Acc:Q9UAQ6]
ENSG00000009790, ENSG00000128596, ENSG00000163681	SLMAP, TRAF3IP3, CCDC136	M4.1	M4.1
ENSG00000100029	PES1	lpd-7	lpd-7		Pescadillo homolog [Source:UniProtKB/Swiss-Prot;Acc:Q95Y89]
ENSG00000004897	CDC27	mat-1	mat-1		Cell division cycle protein 27 homolog [Source:UniProtKB/Swiss-Prot;Acc:Q9N593]
ENSG00000165678	GHITM	K11H12.8	K11H12.8
ENSG00000124299, ENSG00000196236	XPNPEP3, PEPD	K12C11.1, R119.2	K12C11.1
ENSG00000118705	RPN2	ostd-1	ostd-1	RPN2	Dolichyl-diphosphooligosaccharide--protein glycosyltransferase subunit 2 [Source:UniProtKB/Swiss-Prot;Acc:P91390]
ENSG00000130340, ENSG00000178996, ENSG00000173548	SNX18, SNX33, SNX9	lst-4	lst-4		Sorting nexin lst-4 [Source:UniProtKB/Swiss-Prot;Acc:Q8I4E2]
ENSG00000132792	CTNNBL1	M01E11.2	M01E11.2
ENSG00000130332	LSM7	lsm-7	lsm-7		LSM Sm-like protein [Source:UniProtKB/TrEMBL;Acc:Q23543]
ENSG00000106355	LSM5	lsm-5	lsm-5		LSM Sm-like protein [Source:UniProtKB/TrEMBL;Acc:O18694]
ENSG00000011376	LARS2	lars-2	lars-2		Leucyl Amino-acyl tRNA Synthetase [Source:UniProtKB/TrEMBL;Acc:Q23511]
ENSG00000261283, ENSG00000128563	PRKRIP1	F37A4.2	F37A4.2
ENSG00000132613, ENSG00000170873	MTSS1L, MTSS1	M04F3.5	M04F3.5	MTSS1L, MTSS1
ENSG00000102882, ENSG00000100030, ENSG00000166484	MAPK7, MAPK1, MAPK3	F09C12.2, mpk-1, mpk-2	mpk-1	MAPK1, MAPK3	Mitogen-activated protein kinase [Source:UniProtKB/TrEMBL;Acc:Q19243]
ENSG00000020922	MRE11A	mre-11	mre-11		Double-strand break repair protein mre-11 [Source:UniProtKB/Swiss-Prot;Acc:Q23255]
ENSG00000087095	NLK	lit-1	lit-1	NLK	Serine/threonine kinase NLK [Source:UniProtKB/Swiss-Prot;Acc:Q9U9Y8]
ENSG00000130829, ENSG00000112679, ENSG00000184545, ENSG00000143507, ENSG00000139318, ENSG00000111266, ENSG00000149599, ENSG00000164086	DUSP15, DUSP7, DUSP22, DUSP8, DUSP6, DUSP16, DUSP10, DUSP9	F13D11.3, lip-1, C16A3.2, vhp-1	lip-1, C16A3.2	DUSP8, DUSP6
ENSG00000100395, ENSG00000163935, ENSG00000198879, ENSG00000011258	MBTD1, SFMBT2, L3MBTL2, SFMBT1	mbtr-1, lin-61	lin-61		Malignant brain tumor repeat protein 1 [Source:UniProtKB/Swiss-Prot;Acc:A0SQM0]
ENSG00000152217, ENSG00000181555, ENSG00000152455, ENSG00000101945, ENSG00000116539	SETBP1, SETD2, SUV39H1, SUV39H2, ASH1L	met-1, lin-59, set-12, set-25	met-1, set-25	ASH1L, SETD2, SETBP1	Histone-lysine N-methyltransferase [Source:UniProtKB/TrEMBL;Acc:A4LBC3]
ENSG00000161395	PGAP3	R01B10.4	R01B10.4
ENSG00000153107	ANAPC1	mat-2	mat-2	ANAPC1	Anaphase-promoting complex subunit 1 [Source:UniProtKB/Swiss-Prot;Acc:O18191]
ENSG00000129933	MAU2	mau-2	mau-2		Maternal uncoordinated protein 2 [Source:UniProtKB/Swiss-Prot;Acc:O17581]
ENSG00000198826	ARHGAP11A	rga-3, rga-4	rga-3, rga-4		Rho GTPase Activating protein [Source:UniProtKB/TrEMBL;Acc:O01585]
ENSG00000136982	DSCC1	K09H9.2	K09H9.2
ENSG00000230961, ENSG00000230293, ENSG00000237333, ENSG00000096474, ENSG00000235222, ENSG00000233345, ENSG00000204410, ENSG00000235569, ENSG00000227314	MSH5	msh-5	msh-5		MutS protein homolog 5 [Source:UniProtKB/Swiss-Prot;Acc:Q19272]
ENSG00000175324	LSM1	lsm-1	lsm-1		LSM Sm-like protein [Source:UniProtKB/TrEMBL;Acc:Q20229]
ENSG00000188833, ENSG00000138185, ENSG00000168032, ENSG00000198018, ENSG00000054179, ENSG00000197217	ENTPD7, ENTPD4, ENTPD8, ENTPD3, ENTPD1, ENTPD2	mig-23, ntp-1	ntp-1		Nucleoside-diphosphatase mig-23 [Source:UniProtKB/Swiss-Prot;Acc:Q21815]
ENSG00000215769, ENSG00000185467, ENSG00000182481	KPNA7, KPNA2, RP13-104F24.2	ima-2	ima-2		Importin subunit alpha-2 [Source:UniProtKB/Swiss-Prot;Acc:P91276]
ENSG00000112118	MCM3	mcm-3	mcm-3		DNA helicase [Source:UniProtKB/TrEMBL;Acc:Q9XVR7]
ENSG00000050130	JKAMP	jamp-1	jamp-1		JAMP (JNK1-Associated Membrane Protein) homolog; Seven transmembrane protein [Source:UniProtKB/TrEMBL;Acc:G5EBX4]
ENSG00000132382	MYBBP1A	K04C2.2	K04C2.2
ENSG00000099977, ENSG00000099974	DDT, DDTL	mif-2, mif-3	mif-3		MIF-like protein mif-2 [Source:UniProtKB/Swiss-Prot;Acc:Q18785]
ENSG00000077458, ENSG00000009780	FAM76A, FAM76B	K04F10.7	K04F10.7
ENSG00000109685, ENSG00000147548, ENSG00000165671	WHSC1, WHSC1L1, NSD1	mes-4	mes-4	NSD1	Histone-lysine N-methyltransferase mes-4 [Source:UniProtKB/Swiss-Prot;Acc:Q9NH52]
		mel-28	mel-28
ENSG00000144228, ENSG00000121067	SPOPL, SPOP	bath-43, bath-44, mel-26	bath-44		BTB and MATH domain-containing protein 43 [Source:UniProtKB/Swiss-Prot;Acc:P34568]
ENSG00000102781, ENSG00000186625	KATNAL1, KATNA1	mei-1	mei-1		Meiotic spindle formation protein mei-1 [Source:UniProtKB/Swiss-Prot;Acc:P34808]
ENSG00000148377, ENSG00000067064	IDI2, IDI1	idi-1	idi-1		Isopentenyl Diphosphate Isomerase; Isopentenyl-diphosphate isomerase [Source:UniProtKB/TrEMBL;Acc:G5EFQ1]
ENSG00000133997	MED6	mdt-6	mdt-6	MED6	Mediator of RNA polymerase II transcription subunit 6 [Source:UniProtKB/Swiss-Prot;Acc:Q9N337]
ENSG00000076003	MCM6	mcm-6	mcm-6		DNA replication licensing factor mcm-6 [Source:UniProtKB/Swiss-Prot;Acc:P34647]
ENSG00000096070, ENSG00000100425, ENSG00000156983	BRPF1, BRD1, BRPF3	lin-49	lin-49	BRPF1, BRD1
ENSG00000228875, ENSG00000224774, ENSG00000224398, ENSG00000230700, ENSG00000232960, ENSG00000204435, ENSG00000206406	CSNK2B	kin-10	kin-10		Casein kinase II subunit beta [Source:UniProtKB/Swiss-Prot;Acc:P28548]
ENSG00000128016, ENSG00000185650, ENSG00000152518	ZFP36L1, ZFP36, ZFP36L2	oma-2, moe-3, oma-1, ccch-1	oma-1	ZFP36L1	CCCH-type zinc finger protein oma-2 [Source:UniProtKB/Swiss-Prot;Acc:Q23359]
ENSG00000157764, ENSG00000132155, ENSG00000078061	ARAF, BRAF, RAF1	lin-45	lin-45	ARAF	Raf homolog serine/threonine-protein kinase [Source:UniProtKB/Swiss-Prot;Acc:Q07292]
ENSG00000110786, ENSG00000143851, ENSG00000153233	PTPN7, PTPRR, PTPN5	egg-5, egg-4	egg-4, egg-5		EGG sterile (Unfertilizable) [Source:UniProtKB/TrEMBL;Acc:O61789]
ENSG00000134121, ENSG00000163531, ENSG00000091129, ENSG00000198910	CHL1, NRCAM, L1CAM, NFASC	lad-2, sax-7	sax-7	CHL1, NRCAM, L1CAM, NFASC	Immunoglobulin domain-containing protein Y54G2A.25; L1 CAM ADhesion molecule homolog; LAD-2 long isoform [Source:UniProtKB/TrEMBL;Acc:G5ECX2]
ENSG00000226650, ENSG00000090889	KIF4A, KIF4B	klp-19	klp-19		Kinesin-like protein [Source:UniProtKB/TrEMBL;Acc:O45935]
ENSG00000116852, ENSG00000139116	KIF21B, KIF21A	klp-12	klp-12	KIF21B, KIF21A	Kinesin-Like Protein [Source:UniProtKB/TrEMBL;Acc:B3GWD7]
ENSG00000138709, ENSG00000155506	LARP1, LARP1B	larp-1	larp-1	LARP1	La-related protein 1 [Source:UniProtKB/Swiss-Prot;Acc:D5MCN2]
ENSG00000142945, ENSG00000141200, ENSG00000186638, ENSG00000068796	KIF24, KIF2B, KIF2A, KIF2C	klp-7	klp-7	KIF2A	Kinesin-like protein [Source:UniProtKB/TrEMBL;Acc:G5ED75]
ENSG00000204197, ENSG00000167702, ENSG00000140859, ENSG00000233450, ENSG00000237649	KIFC3, KIFC1, KIFC2	klp-17, klp-3, klp-16, klp-15	klp-15, klp-16	KIFC3	Kinesin-like protein [Source:UniProtKB/TrEMBL;Acc:Q23124]
ENSG00000126602	TRAP1	R151.7	R151.7
ENSG00000141551, ENSG00000180138, ENSG00000213923, ENSG00000113712	CSNK1D, CSNK1A1L, CSNK1A1, CSNK1E	kin-19, kin-20	kin-19	CSNK1D, CSNK1A1	Casein kinase I isoform alpha [Source:UniProtKB/Swiss-Prot;Acc:P42168]
ENSG00000069020, ENSG00000099308, ENSG00000105613, ENSG00000086015	MAST4, MAST3, MAST1, MAST2	kin-4	kin-4		KIN-4 protein; Protein KINase [Source:UniProtKB/TrEMBL;Acc:G5EFA4]
ENSG00000196839, ENSG00000168803	ADA, ADAL	C44B7.12, C06G3.5	C44B7.12		Adenosine deaminase-like protein [Source:UniProtKB/Swiss-Prot;Acc:Q8IG39]
ENSG00000151611	MMAA	mmaa-1	mmaa-1		Methylmalonic aciduria type A homolog, mitochondrial [Source:UniProtKB/Swiss-Prot;Acc:Q22111]
ENSG00000143952	VPS54	vps-54	vps-54		Vacuolar protein sorting-associated protein 54 [Source:UniProtKB/Swiss-Prot;Acc:Q22639]
ENSG00000064102	ASUN	R02D3.4	R02D3.4
ENSG00000052795, ENSG00000217128	FNIP1, FNIP2	T04C4.1	T04C4.1
ENSG00000178607, ENSG00000134398	ERN1, ERN2	ire-1	ire-1		Serine/threonine-protein kinase/endoribonuclease ire-1 Serine/threonine-protein kinase Endoribonuclease [Source:UniProtKB/Swiss-Prot;Acc:Q09499]
ENSG00000071205, ENSG00000159842, ENSG00000165895, ENSG00000186716, ENSG00000145819, ENSG00000079482	BCR, ARHGAP42, ARHGAP10, ABR, ARHGAP26, OPHN1	T04C9.1	T04C9.1	ABR
ENSG00000101146	RAE1	rae-1	rae-1		mRNA export factor rae-1 [Source:UniProtKB/Swiss-Prot;Acc:Q93454]
ENSG00000164961	KIAA0196	T05E7.3	T05E7.3
ENSG00000243927	MRPS6	mrps-6	mrps-6		Mitochondrial Ribosomal Protein, Small [Source:UniProtKB/TrEMBL;Acc:O61791]
ENSG00000076321	KLHL20	R12E2.1	R12E2.1
ENSG00000206557	TRIM71	lin-41	lin-41
ENSG00000174106, ENSG00000161904	LEMD3, LEMD2	lem-2	lem-2	LEMD3	LEM protein 2 [Source:UniProtKB/Swiss-Prot;Acc:Q9XTB5]
ENSG00000182979, ENSG00000057935, ENSG00000149480	MTA1, MTA2, MTA3	lin-40	lin-40
ENSG00000110768	GTF2H1	R02D3.3	R02D3.3
ENSG00000072803, ENSG00000166167	BTRC, FBXW11	lin-23	lin-23	BTRC, FBXW11	F-box/WD repeat-containing protein lin-23 [Source:UniProtKB/Swiss-Prot;Acc:Q09990]
ENSG00000114125	RNF7	rbx-2	rbx-2		Yeast RBX (Ring finger protein) homolog [Source:UniProtKB/TrEMBL;Acc:P91404]
ENSG00000182504	CEP97	R02F11.4	R02F11.4
ENSG00000215211, ENSG00000230883		R04E5.8	R04E5.8
ENSG00000105983, ENSG00000139636	LMBR1, LMBR1L	R05D3.2	R05D3.2		LIMR family protein R05D3.2 [Source:UniProtKB/Swiss-Prot;Acc:P34535]
ENSG00000174405	LIG4	lig-4	lig-4		LIGase [Source:UniProtKB/TrEMBL;Acc:Q95YE6]
ENSG00000105486	LIG1	lig-1	lig-1		DNA ligase 1 [Source:UniProtKB/Swiss-Prot;Acc:Q27474]
ENSG00000101460, ENSG00000171471, ENSG00000140941	MAP1LC3A, MAP1LC3B	lgg-2	lgg-2
ENSG00000176894, ENSG00000247077	PGAM5, PXMP2	pgam-5	pgam-5		Serine/threonine-protein phosphatase Pgam5, mitochondrial [Source:UniProtKB/Swiss-Prot;Acc:Q09422]
ENSG00000148843	PDCD11	let-716	let-716
ENSG00000125107	CNOT1	let-711	let-711		NTL-1a [Source:UniProtKB/TrEMBL;Acc:Q20937]
ENSG00000062650	WAPL	wapl-1	wapl-1	WAPL	Wings apart-like protein homolog 1 [Source:UniProtKB/Swiss-Prot;Acc:H2L0H5]
ENSG00000067900, ENSG00000134318	ROCK2, ROCK1	let-502	let-502	ROCK2	Rho-associated protein kinase let-502 [Source:UniProtKB/Swiss-Prot;Acc:P92199]
ENSG00000114346	ECT2	ect-2	ect-2		ECT2 (Mammalian Rho GEF) homolog [Source:UniProtKB/TrEMBL;Acc:Q22590]
ENSG00000113318, ENSG00000116062	MSH3, MSH6	msh-6	msh-6		MSH (MutS Homolog) family [Source:UniProtKB/TrEMBL;Acc:Q9N3T8]
ENSG00000063601, ENSG00000269031, ENSG00000171100, ENSG00000087053	MTM1, MTMR2, MTMR1	mtm-1	mtm-1		Myotubularin-related protein 1 [Source:UniProtKB/Swiss-Prot;Acc:Q9N589]
ENSG00000100410	PHF5A	phf-5	phf-5		PHF-5; PHd Finger family [Source:UniProtKB/TrEMBL;Acc:G5EBY6]
ENSG00000198682, ENSG00000138801	PAPSS1, PAPSS2	pps-1	pps-1		3'-Phosphoadenosine 5'-Phosphosulfate Synthetase [Source:UniProtKB/TrEMBL;Acc:A0A061AE05]
ENSG00000100056	DGCR14	ess-2	ess-2		ES2 similar protein 2 [Source:UniProtKB/Swiss-Prot;Acc:P34420]
ENSG00000149923	PPP4C	pph-4.1, pph-4.2	pph-4.1, pph-4.2		Serine/threonine-protein phosphatase 4 catalytic subunit 1 [Source:UniProtKB/Swiss-Prot;Acc:Q9XW79]
ENSG00000186704, ENSG00000078319, ENSG00000123965, ENSG00000198632, ENSG00000174368, ENSG00000127957, ENSG00000122512, ENSG00000188073, ENSG00000064933	PMS1, PMS2P1, DTX2P1, PMS2P5, PMS2P3, PMS2	pms-2	pms-2		PMS (Post Meiotic Segregation) family [Source:UniProtKB/TrEMBL;Acc:G5EFG5]
ENSG00000214982, ENSG00000237486, ENSG00000227345	PARG	pme-4, pme-3	pme-3
ENSG00000110917	MLEC	F44E2.10	F44E2.10
ENSG00000166851, ENSG00000145632, ENSG00000237810, ENSG00000173846	CTD-2571E19.3, PLK2, PLK3, PLK1	plk-1, plk-3, plk-2	plk-3		Serine/threonine-protein kinase plk-1 [Source:UniProtKB/Swiss-Prot;Acc:P34331]
ENSG00000161714, ENSG00000139151, ENSG00000115556, ENSG00000187091, ENSG00000248833	PLCZ1, PLCD3, PLCD4, PLCD1	plc-4	plc-4		Phosphoinositide phospholipase C [Source:UniProtKB/TrEMBL;Acc:Q21754]
ENSG00000163558, ENSG00000067606	PRKCZ, PRKCI	pkc-3	pkc-3		Protein kinase C-like 3 [Source:UniProtKB/Swiss-Prot;Acc:Q19266]
ENSG00000137337, ENSG00000157212	MDC1, PAXIP1	pis-1	pis-1		PIS (Pax-2, IA-1/6, Smad-2 interacting protein) homolog [Source:UniProtKB/TrEMBL;Acc:Q9U370]
ENSG00000140451	PIF1	pif-1	pif-1		ATP-dependent DNA helicase PIF1 [Source:UniProtKB/TrEMBL;Acc:G5EFV7]
ENSG00000174327, ENSG00000174326, ENSG00000168679, ENSG00000165449, ENSG00000163053	SLC16A11, SLC16A13, SLC16A9, SLC16A14, SLC16A4	C01B4.9, F10G7.5, M03B6.2, C49F8.2, T02G5.12, C10E2.6, pes-22, Y59A8B.21, Y19D10A.12	Y59A8B.21
ENSG00000170638	TRABD	F38A5.2	F38A5.2
ENSG00000145604	SKP2	skpt-1	skpt-1		SKP2 (S phase Kinase associated Protein Two) homolog [Source:UniProtKB/TrEMBL;Acc:Q09397]
ENSG00000176473, ENSG00000168438	CDC40, WDR25	Y54G2A.12, prp-17	prp-17
ENSG00000059758, ENSG00000117266, ENSG00000102225	CDK18, CDK17, CDK16	pct-1	pct-1	CDK17	Cyclin-dependent kinase 17 [Source:UniProtKB/Swiss-Prot;Acc:Q8I7M8]
ENSG00000132646	PCNA	pcn-1	pcn-1	PCNA	Proliferating cell nuclear antigen [Source:UniProtKB/Swiss-Prot;Acc:O02115]
ENSG00000042088	TDP1	F52C12.1	F52C12.1		Probable tyrosyl-DNA phosphodiesterase [Source:UniProtKB/Swiss-Prot;Acc:Q9TXV7]
ENSG00000070785	EIF2B3	ppp-1, tra-2	tra-2		Sex-determining transformer protein 2 [Source:UniProtKB/Swiss-Prot;Acc:P34709]
ENSG00000185359	HGS	hgrs-1	hgrs-1		Hepatocyte Growth factor-Regulated TK Substrate (HRS) family [Source:UniProtKB/TrEMBL;Acc:Q17796]
ENSG00000205220, ENSG00000136930	PSMB7, PSMB10	pbs-2	pbs-2		Proteasome subunit beta type [Source:UniProtKB/TrEMBL;Acc:O62102]
ENSG00000184708	EIF4ENIF1	ifet-1	ifet-1	EIF4ENIF1	Translational repressor ifet-1 [Source:UniProtKB/Swiss-Prot;Acc:Q20898]
ENSG00000177192	PUS1	pus-1	pus-1		tRNA pseudouridine synthase [Source:UniProtKB/TrEMBL;Acc:Q9XXN0]
ENSG00000179295, ENSG00000111679, ENSG00000217801	PTPN11, PTPN6, RP11-465B22.3	ptp-2	ptp-2		Tyrosine-protein phosphatase non-receptor type ptp-2 [Source:UniProtKB/Swiss-Prot;Acc:G5EC24]
ENSG00000157593	SLC35B2	pst-1	pst-1		Adenosine 3'-phospho 5'-phosphosulfate transporter 1 [Source:UniProtKB/Swiss-Prot;Acc:Q8MXJ9]
ENSG00000188917, ENSG00000099899	TRMT2B, TRMT2A	H24K24.4	H24K24.4
ENSG00000154611, ENSG00000101182	PSMA8, PSMA7	pas-4	pas-4		Proteasome subunit alpha type-7 [Source:UniProtKB/Swiss-Prot;Acc:Q95005]
ENSG00000161813, ENSG00000107929	LARP4B, LARP4	larp-5	larp-5	LARP4B	LARP (RNA binding La related protein) homolog [Source:UniProtKB/TrEMBL;Acc:O44760]
ENSG00000162735	PEX19	prx-19	prx-19		Putative peroxisomal biogenesis factor 19 [Source:UniProtKB/Swiss-Prot;Acc:P34453]
ENSG00000134697	GNL2	ngp-1	ngp-1		Nucleolar GTP-binding protein 2 [Source:UniProtKB/TrEMBL;Acc:Q9U365]
ENSG00000065268	WDR18	pro-1	pro-1		Pre-rRNA-processing protein pro-1 [Source:UniProtKB/Swiss-Prot;Acc:Q22006]
ENSG00000111711, ENSG00000174567	GOLT1B, GOLT1A	F41C3.4	F41C3.4		Probable Golgi transport protein 1 [Source:UniProtKB/Swiss-Prot;Acc:Q20263]
ENSG00000198056	PRIM1	T24C4.5, pri-1	pri-1		DNA primase [Source:UniProtKB/TrEMBL;Acc:Q9TZ34]
ENSG00000197181, ENSG00000134627, ENSG00000125207, ENSG00000184571	PIWIL2, PIWIL3, PIWIL4, PIWIL1	prg-1, prg-2	prg-1, prg-2		Piwi-like protein [Source:UniProtKB/TrEMBL;Acc:P90786]
ENSG00000164190	NIPBL	pqn-85	pqn-85	NIPBL	Nipped-B-like protein pqn-85 [Source:UniProtKB/Swiss-Prot;Acc:Q95XZ5]
ENSG00000173473, ENSG00000139613	SMARCC1, SMARCC2	swsn-1	swsn-1		SWI/SNF nucleosome remodeling complex component; SWI3-like protein [Source:UniProtKB/TrEMBL;Acc:G5EF87]
ENSG00000070540, ENSG00000157954	WIPI1, WIPI2	atg-18	atg-18		AuTophaGy (Yeast Atg homolog) [Source:UniProtKB/TrEMBL;Acc:H2KYN5]
ENSG00000243244, ENSG00000242441, ENSG00000165417, ENSG00000068781, ENSG00000140022	STON1-GTF2A1L, GTF2A1, STON1, GTF2A1L, STON2	unc-41, pqn-51	pqn-51		Putative stoned B-like protein [Source:UniProtKB/Swiss-Prot;Acc:P90761]
ENSG00000108294		pbs-3	pbs-3		Proteasome subunit beta type-3 [Source:UniProtKB/Swiss-Prot;Acc:Q23237]
ENSG00000155561	NUP205	npp-3	npp-3		Nuclear Pore complex Protein [Source:UniProtKB/TrEMBL;Acc:Q21436]
ENSG00000142655	PEX14	prx-14	prx-14		PeRoXisome assembly factor [Source:UniProtKB/TrEMBL;Acc:Q93930]
ENSG00000107951, ENSG00000149016	MTPAP, TUT1	mut-2	mut-2		MUTator [Source:UniProtKB/TrEMBL;Acc:Q8IA66]
ENSG00000135213, ENSG00000158553, ENSG00000126883, ENSG00000196313	POM121, POM121L2, NUP214	npp-14	npp-14		Nuclear pore complex protein 14 [Source:UniProtKB/Swiss-Prot;Acc:Q17602]
ENSG00000160209	PDXK	F57C9.1	F57C9.1
ENSG00000110713, ENSG00000213024	NUP62, NUP98	npp-11, npp-10	npp-10		Nuclear Pore complex Protein [Source:UniProtKB/TrEMBL;Acc:O01576]
ENSG00000187627, ENSG00000183054, ENSG00000015568, ENSG00000185304, ENSG00000169629, ENSG00000099901, ENSG00000153165, ENSG00000153201, ENSG00000196862	RGPD2, RGPD4, RGPD6, RANBP2, RANBP1, RGPD5, RGPD3, RGPD1, RGPD8	npp-9	npp-9		Nuclear Pore complex Protein [Source:UniProtKB/TrEMBL;Acc:Q21021]
ENSG00000030066	NUP160	npp-6	npp-6		Nuclear Pore complex Protein [Source:UniProtKB/TrEMBL;Acc:Q8T8M4]
ENSG00000013561	RNF14	F56D2.5, F56D2.2	F56D2.2
ENSG00000138750	NUP54	npp-1	npp-1		Nuclear Pore complex Protein [Source:UniProtKB/TrEMBL;Acc:Q9U3B9]
ENSG00000198646	NCOA6	nos-3	nos-3	NCOA6	NanOS related [Source:UniProtKB/TrEMBL;Acc:O18218]
ENSG00000198963, ENSG00000069667, ENSG00000143365	RORB, RORA, RORC	nhr-23	nhr-23		Nuclear hormone receptor family member nhr-23 [Source:UniProtKB/Swiss-Prot;Acc:P41828]
ENSG00000268946, ENSG00000085224	ATRX	xnp-1	xnp-1		Transcriptional regulator ATRX homolog [Source:UniProtKB/Swiss-Prot;Acc:Q9U7E0]
ENSG00000047249	ATP6V1H	vha-18, vha-15	vha-18		Probable V-type proton ATPase subunit H 1 [Source:UniProtKB/Swiss-Prot;Acc:Q20666]
ENSG00000157020	SEC13	npp-20	npp-20		Protein SEC13 homolog [Source:UniProtKB/Swiss-Prot;Acc:Q9N4A7]
ENSG00000067113, ENSG00000162407, ENSG00000141934	PLPP1, PLPP3, PLPP2	F53C3.13, T28D9.3	F53C3.13	PLPP3
ENSG00000148498, ENSG00000116117	PARD3B, PARD3	par-3	par-3		Partitioning defective protein 3 [Source:UniProtKB/Swiss-Prot;Acc:Q17353]
ENSG00000110171, ENSG00000109654	TRIM2, TRIM3	ncl-1, nhl-1	ncl-1		B-box type zinc finger protein ncl-1 [Source:UniProtKB/Swiss-Prot;Acc:P34611]
ENSG00000198604	BAZ1A	athp-2	athp-2		AT Hook plus PHD finger transcription factor [Source:UniProtKB/TrEMBL;Acc:Q9N5L9]
ENSG00000143256	PFDN2	pfd-2	pfd-2		Prefoldin subunit 2 [Source:UniProtKB/Swiss-Prot;Acc:Q9N5M2]
ENSG00000186501	TMEM222	H20J04.6	H20J04.6
ENSG00000187609	EXD3	ZK1098.3, Y57A10A.13, mut-7	mut-7
ENSG00000132182, ENSG00000198284, ENSG00000143552	NUP210P1, NUP210, NUP210L	npp-12	npp-12		Nuclear Pore complex Protein [Source:UniProtKB/TrEMBL;Acc:P91495]
ENSG00000069248	NUP133	npp-15	npp-15		Nuclear pore complex protein 15 [Source:UniProtKB/Swiss-Prot;Acc:P34343]
ENSG00000132470, ENSG00000115221, ENSG00000160255, ENSG00000259207, ENSG00000082781, ENSG00000139626, ENSG00000150093	ITGB7, ITGB6, ITGB3, ITGB5, ITGB4, ITGB1, ITGB2	pat-3	pat-3	ITGB1	Integrin beta pat-3 [Source:UniProtKB/Swiss-Prot;Acc:Q27874]
ENSG00000093000, ENSG00000238163	NUP50	npp-16	npp-16		Nuclear Pore complex Protein [Source:UniProtKB/TrEMBL;Acc:Q9U240]
ENSG00000170734	POLH	polh-1	polh-1		DNA polymerase eta; POLH (DNA polymerase eta) homolog [Source:UniProtKB/TrEMBL;Acc:G5EFY1]
ENSG00000143106	PSMA5	pas-5	pas-5		Proteasome subunit alpha type-5 [Source:UniProtKB/Swiss-Prot;Acc:Q95008]
ENSG00000117748, ENSG00000204086	RPA4, RPA2	rpa-4, rpa-2	rpa-2		Replication Protein A homolog [Source:UniProtKB/TrEMBL;Acc:Q8I7G2]
ENSG00000080986	NDC80	ndc-80	ndc-80		Kinetochore protein ndc-80 [Source:UniProtKB/Swiss-Prot;Acc:Q17635]
ENSG00000113722, ENSG00000165556, ENSG00000131264	CDX4, CDX2, CDX1	pal-1	pal-1		Homeobox protein pal-1 [Source:UniProtKB/Swiss-Prot;Acc:P34766]
ENSG00000100836, ENSG00000205022	PABPN1, PABPN1L	EEED8.12, pabp-2, EEED8.4	pabp-2		Putative RNA-binding protein EEED8.12 [Source:UniProtKB/Swiss-Prot;Acc:Q09301]
ENSG00000166225, ENSG00000137218	FRS3, FRS2	rog-1	rog-1		Ras activating factor in development Of Germline [Source:UniProtKB/TrEMBL;Acc:E6N0V1]
ENSG00000124786	SLC35B3	pst-2	pst-2		Adenosine 3'-phospho 5'-phosphosulfate transporter 2 [Source:UniProtKB/Swiss-Prot;Acc:Q20787]
ENSG00000160404, ENSG00000136827, ENSG00000136816, ENSG00000186283, ENSG00000198113	TOR2A, TOR4A, TOR3A, TOR1A, TOR1B	ooc-5, tor-1, tor-2	ooc-5		Torsin-like protein [Source:UniProtKB/Swiss-Prot;Acc:Q95NU5]
ENSG00000147162	OGT	ogt-1	ogt-1		UDP-N-acetylglucosamine--peptide N-acetylglucosaminyltransferase [Source:UniProtKB/Swiss-Prot;Acc:O18158]
ENSG00000101888, ENSG00000132661	NXT1, NXT2	nxt-1	nxt-1		NTF2-related export protein [Source:UniProtKB/Swiss-Prot;Acc:Q9U757]
ENSG00000015676, ENSG00000090273	NUDC, NUDCD3	nud-1	nud-1		Aspergillus NUclear Division related; NUD-1 [Source:UniProtKB/TrEMBL;Acc:G5EE74]
ENSG00000127616, ENSG00000080503	SMARCA4, SMARCA2	C52B9.8, swsn-4	swsn-4
ENSG00000089737	DDX24	F55F8.2	F55F8.2
ENSG00000137513, ENSG00000134440	NARS2, NARS	nars-2, nars-1	nars-1		Asparaginyl(N) Amino-acyl tRNA Synthetase [Source:UniProtKB/TrEMBL;Acc:Q95PZ8]
ENSG00000070495	JMJD6	psr-1	psr-1		Bifunctional arginine demethylase and lysyl-hydroxylase psr-1 [Source:UniProtKB/Swiss-Prot;Acc:Q9GYI4]
ENSG00000167674, ENSG00000164985, ENSG00000166503, ENSG00000112273, ENSG00000143321	HDGFL1, HDGF, PSIP1, CTB-50L17.10, RP11-382A20.3	C06A5.3	C06A5.3
ENSG00000224510, ENSG00000147669	POLR2KP2, POLR2K	rpb-12	rpb-12		RNA Polymerase II (B) subunit [Source:UniProtKB/TrEMBL;Acc:X5M5N4]
ENSG00000060069	CTDP1	fcp-1	fcp-1	CTDP1	FCP1 (Yeast TFIIF-interacting CTD phosphatase subunit) homolog [Source:UniProtKB/TrEMBL;Acc:Q95QG8]
ENSG00000153989	NUS1	F37B12.3	F37B12.3	NUS1
ENSG00000083799	CYLD	cyld-1	cyld-1		CYLinDromatosis (Human disease gene) homolog [Source:UniProtKB/TrEMBL;Acc:Q7JMS4]
		mig-38	mig-38		Abnormal cell migration protein 38 [Source:UniProtKB/Swiss-Prot;Acc:A6ZJ71]
ENSG00000147316	MCPH1	W04A8.1	W04A8.1
ENSG00000119707	RBM25	W04D2.6	W04D2.6	RBM25
ENSG00000172273, ENSG00000020256, ENSG00000124092, ENSG00000102974	CTCFL, ZFP64, HINFP, CTCF	F39B2.1	F39B2.1
ENSG00000164346	NSA2	W09C5.1	W09C5.1
ENSG00000198477, ENSG00000137871, ENSG00000169548, ENSG00000143442, ENSG00000056277	ZNF280C, ZNF280D, POGZ, ZNF280A	F37D6.2	F37D6.2
ENSG00000163781	TOPBP1	mus-101	mus-101
ENSG00000118322, ENSG00000145246, ENSG00000206190	ATP10D, ATP10B, ATP10A	tat-3, tat-4	tat-3		Phospholipid-transporting ATPase [Source:UniProtKB/TrEMBL;Acc:O18182]
ENSG00000198331	HYLS1	hyls-1	hyls-1
ENSG00000009844	VTA1	T23G11.7	T23G11.7
ENSG00000066455	GOLGA5	T24B1.1	T24B1.1		Golgin-84 [Source:UniProtKB/Swiss-Prot;Acc:P90970]
ENSG00000079950, ENSG00000117758	STX7, STX12	syx-7	syx-7	STX12	SYntaXin [Source:UniProtKB/TrEMBL;Acc:O62236]
ENSG00000134049	IER3IP1	W09G3.8	W09G3.8
ENSG00000103150	MLYCD	mlcd-1	mlcd-1		MaLonyl CoA Decarboxylase [Source:UniProtKB/TrEMBL;Acc:Q20048]
ENSG00000115593, ENSG00000143499, ENSG00000186532, ENSG00000185420	SMYD4, SMYD2, SMYD3, SMYD1	set-14, set-10, set-18, set-30	set-14		SET domain-containing protein 14 [Source:UniProtKB/Swiss-Prot;Acc:Q09415]
ENSG00000176623	RMDN1	F33H2.6	F33H2.6
ENSG00000177084	POLE	F33H2.5	F33H2.5
ENSG00000081087	OSTM1	F42A8.3	F42A8.3
ENSG00000140382, ENSG00000064961	HMG20A, HMG20B	hmg-20	hmg-20		HMG [Source:UniProtKB/TrEMBL;Acc:Q9XVG8]
ENSG00000037897	METTL1	W02B12.10	W02B12.10		tRNA (guanine-N(7)-)-methyltransferase [Source:UniProtKB/Swiss-Prot;Acc:Q23126]
ENSG00000166889	PATL1	patr-1	patr-1		Protein PAT1 homolog 1 [Source:UniProtKB/Swiss-Prot;Acc:Q20374]
ENSG00000017797	RALBP1	rlbp-1	rlbp-1		RaL Binding Protein [Source:UniProtKB/TrEMBL;Acc:E2JL05]
ENSG00000215079, ENSG00000189067, ENSG00000089486	CDIP1, LITAF	F16F9.1, F36G3.3, Y87G2A.18, Y87G2A.19, Y37D8A.8	Y87G2A.18
ENSG00000114374, ENSG00000124486, ENSG00000162402	USP24, USP9Y, USP9X	T24B8.7	T24B8.7	USP9X	Ubiquitin carboxyl-terminal hydrolase [Source:UniProtKB/TrEMBL;Acc:N1NVC2]
ENSG00000205707	LYRM5	Y42A5A.5	Y42A5A.5
ENSG00000140350, ENSG00000136938, ENSG00000143401, ENSG00000214619, ENSG00000139223, ENSG00000265346, ENSG00000184701	ANP32A, ANP32E, ANP32B, ANP32D	T19H12.2, F33H2.3	T19H12.2, F33H2.3	ANP32A	Acidic leucine-rich nuclear phosphoprotein 32-related protein 2 [Source:UniProtKB/Swiss-Prot;Acc:O01615]
ENSG00000126106	TMEM53	T24H10.4, C09B8.4, T10B11.6	T10B11.6
ENSG00000168589, ENSG00000125971	DYNLRB1, DYNLRB2	dyrb-1	dyrb-1		Dynein light chain roadblock [Source:UniProtKB/TrEMBL;Acc:Q22752]
ENSG00000164124	TMEM144	W06A7.4, F49C12.6, W02D3.4, T19A6.4, K07F5.12, R144.6	R144.6
ENSG00000105287, ENSG00000184304, ENSG00000115825	PRKD2, PRKD1, PRKD3	dkf-1, dkf-2	dkf-2	PRKD3	Serine/threonine-protein kinase dkf-1 [Source:UniProtKB/Swiss-Prot;Acc:Q9XUJ7]
ENSG00000184381	PLA2G6	D1037.5, W07A8.2, F47A4.5, C45B2.6, H23L24.2	W07A8.2
ENSG00000157916	RER1	rer-1	rer-1		Protein RER1 homolog [Source:UniProtKB/Swiss-Prot;Acc:P52879]
ENSG00000135587	SMPD2	T27F6.6	T27F6.6		Putative neutral sphingomyelinase [Source:UniProtKB/Swiss-Prot;Acc:O45870]
ENSG00000136874	STX17	syx-17	syx-17		SYntaXin [Source:UniProtKB/TrEMBL;Acc:O62387]
ENSG00000166822	TMEM170A	F43G9.13	F43G9.13
ENSG00000159086, ENSG00000005436	GCFC2, PAXBP1	F43G9.12	F43G9.12	PAXBP1
ENSG00000122966	CIT	W02B8.2, F59A6.5	F59A6.5
ENSG00000176853	FAM91A1	F33H2.2	F33H2.2
ENSG00000204219, ENSG00000171703, ENSG00000187735, ENSG00000176896	TCEA3, TCEA1, TCEANC, TCEA2	T24H10.1	T24H10.1		Putative transcription elongation factor S-II [Source:UniProtKB/Swiss-Prot;Acc:P52652]
ENSG00000129691	ASH2L	ash-2	ash-2		Set1/Ash2 histone methyltransferase complex subunit ash-2 [Source:UniProtKB/Swiss-Prot;Acc:G5EFZ3]
ENSG00000204518, ENSG00000197953, ENSG00000114771, ENSG00000188984, ENSG00000144959	AADACL2, NCEH1, AADACL4, AADAC, AADACL3	Y43F8A.3, trcs-1, F16F9.4, T09B9.1	trcs-1		TRansport of membrane to Cell Surface [Source:UniProtKB/TrEMBL;Acc:Q19839]
ENSG00000141580, ENSG00000196998	WDR45, WDR45B	epg-6	epg-6		Ectopic P Granules [Source:UniProtKB/TrEMBL;Acc:E3CTH5]
ENSG00000159461	AMFR	hrdl-1	hrdl-1		E3 ubiquitin-protein ligase hrd-like protein 1 [Source:UniProtKB/Swiss-Prot;Acc:P90859]
ENSG00000169660	HEXDC	hex-5, hex-3, hex-4, hex-2	hex-4		HEXosaminidase; Hexosaminidase [Source:UniProtKB/TrEMBL;Acc:G5EEC8]
ENSG00000138621	PPCDC	F25H9.6	F25H9.6
ENSG00000145414	NAF1	F25H8.2	F25H8.2
ENSG00000092853	CLSPN	F25H5.5	F25H5.5
ENSG00000178222	RNF212	F55A12.10, Y39B6A.16	F55A12.10, Y39B6A.16
ENSG00000113163	COL4A3BP	F25H2.6	F25H2.6	COL4A3BP
ENSG00000131148, ENSG00000100908	EMC8, EMC9	F25H2.4	F25H2.4
ENSG00000188342	GTF2F2	Y39B6A.36	Y39B6A.36		General transcription factor IIF subunit 2 [Source:UniProtKB/TrEMBL;Acc:Q8MYM8]
ENSG00000039650	PNKP	F21D5.5	F21D5.5
ENSG00000047056	WDR37	C05D2.10	C05D2.10
ENSG00000174928	C3orf33	F32A11.1, W09H1.3	F32A11.1
ENSG00000161939, ENSG00000258315	RNASEK-C17orf49, C17orf49	Y43F8C.6	Y43F8C.6
ENSG00000011426	ANLN	ani-1, ani-3, ani-2	ani-1		Anillin-like protein 1 [Source:UniProtKB/Swiss-Prot;Acc:Q9XTT4]
ENSG00000168137, ENSG00000005483	SETD5, KMT2E	Y73B3A.1, set-9, set-26, set-24	Y73B3A.1, set-9	SETD5, KMT2E
ENSG00000224737, ENSG00000227561, ENSG00000171634, ENSG00000099954, ENSG00000230374	CECR2, BPTF	nurf-1	nurf-1		Nucleosome-remodeling factor subunit NURF301-like [Source:UniProtKB/Swiss-Prot;Acc:Q6BER5]
ENSG00000213064, ENSG00000198818	SFT2D1, SFT2D2	F27D4.7	F27D4.7		Vesicle transport protein [Source:UniProtKB/TrEMBL;Acc:Q7YTP0]
ENSG00000170089, ENSG00000051596	THOC3, RP11-423H2.1	thoc-3	thoc-3		THO Complex (Transcription factor/nuclear export) subunit [Source:UniProtKB/TrEMBL;Acc:P91867]
ENSG00000177096	FAM109B	Y37D8A.25	Y37D8A.25
ENSG00000177752, ENSG00000145817	YIPF5, YIPF7	F32D8.14	F32D8.14
ENSG00000089693, ENSG00000178053	MLF2, MLF1	Y17G7B.17	Y17G7B.17
ENSG00000054611, ENSG00000065491	TBC1D22A, TBC1D22B	tbc-3	tbc-3		TBC (Tre-2/Bub2/Cdc16) domain family [Source:UniProtKB/TrEMBL;Acc:Q7JL36]
ENSG00000165630	PRPF18	F32B6.3	F32B6.3
ENSG00000188167	TMPPE	F40B5.2, T23G7.2	T23G7.2		Putative metallophosphoesterase F40B5.2 [Source:UniProtKB/Swiss-Prot;Acc:Q09320]
ENSG00000123643, ENSG00000186335, ENSG00000180773, ENSG00000186334	SLC36A1, SLC36A4, SLC36A2, SLC36A3	Y43F4B.7, T27A1.5	Y43F4B.7
ENSG00000146476	ARMT1	F31D4.2	F31D4.2
ENSG00000105216, ENSG00000262860, ENSG00000149657	LSM14A, LSM14B	car-1	car-1	LSM14B	Cytokinesis, Apoptosis, RNA-associated [Source:UniProtKB/TrEMBL;Acc:Q9XW17]
ENSG00000116954, ENSG00000025039	RRAGC, RRAGD	ragc-1	ragc-1		RAs-related GTP binding protein C homolog [Source:UniProtKB/TrEMBL;Acc:A0A061ACG4]
ENSG00000165794, ENSG00000141873, ENSG00000143570	SLC39A1, SLC39A3, SLC39A2	F30B5.7, C06G8.3, F55F8.9, F31C3.4, Y54G9A.4	F31C3.4, F55F8.9
ENSG00000122390, ENSG00000121579	NAA60, NAA50	F40F4.7, F54E7.9, F30F8.10	F40F4.7, F30F8.10
ENSG00000211456	SACM1L	sac-1	sac-1		SAC1 PIP phosphatase (Yeast Suppressor of ACtin) homolog [Source:UniProtKB/TrEMBL;Acc:Q93641]
ENSG00000068745, ENSG00000161896, ENSG00000176095	IP6K2, IP6K3, IP6K1	Y22D7AR.6, T20F7.3, F30A10.3	F30A10.3		Kinase [Source:UniProtKB/TrEMBL;Acc:Q9BKX8]
ENSG00000064651, ENSG00000074803, ENSG00000070915	SLC12A1, SLC12A2, SLC12A3	B0303.11, nkcc-1	nkcc-1		Uncharacterized amino-acid permease B0303.11 [Source:UniProtKB/Swiss-Prot;Acc:P34261]
ENSG00000174177	CTU2	tut-2	tut-2		Cytoplasmic tRNA 2-thiolation protein 2 [Source:UniProtKB/Swiss-Prot;Acc:Q19906]
ENSG00000164327	RICTOR	rict-1	rict-1
ENSG00000179085	DPM3	dpm-3	dpm-3		Probable dolichol-phosphate mannosyltransferase subunit 3 [Source:UniProtKB/Swiss-Prot;Acc:Q9XVV5]
ENSG00000106077, ENSG00000262947	ABHD11	F32B4.6, R05D7.4	R05D7.4
ENSG00000143751	SDE2	F53F4.14	F53F4.14
ENSG00000166902	MRPL16	mrpl-16	mrpl-16		Mitochondrial Ribosomal Protein, Large [Source:UniProtKB/TrEMBL;Acc:Q22140]
ENSG00000125733, ENSG00000137942, ENSG00000187239	FNBP1L, TRIP10, FNBP1	toca-1, toca-2	toca-2	FNBP1L, FNBP1	Transducer of Cdc42-dependent actin assembly protein 1 homolog [Source:UniProtKB/Swiss-Prot;Acc:Q19253]
ENSG00000029364	SLC39A9	T01D3.5	T01D3.5
ENSG00000101194	SLC17A9	vnut-1	vnut-1		Vesicular NUcleotide Transporte [Source:UniProtKB/TrEMBL;Acc:O45678]
ENSG00000119720	NRDE2	nrde-2	nrde-2		Nuclear RNAi defective-2 protein [Source:UniProtKB/Swiss-Prot;Acc:G5EG51]
ENSG00000125149	C16orf70	T01G9.2	T01G9.2		UPF0183 protein T01G9.2 [Source:UniProtKB/Swiss-Prot;Acc:P34692]
ENSG00000205356	TECPR1	T01H3.2	T01H3.2
ENSG00000138768	USO1	uso-1	uso-1		USO1 (Yeast transport protein) homolog [Source:UniProtKB/TrEMBL;Acc:G5EGG0]
ENSG00000162408	NOL9	nol-9	nol-9		Polynucleotide 5'-hydroxyl-kinase nol-9 [Source:UniProtKB/Swiss-Prot;Acc:Q9U3B6]
ENSG00000197586, ENSG00000187097	ENTPD5, ENTPD6	uda-1	uda-1		Nucleoside-diphosphatase uda-1 [Source:UniProtKB/Swiss-Prot;Acc:Q9XU84]
ENSG00000151229, ENSG00000160326, ENSG00000136856	SLC2A6, SLC2A8, SLC2A13	hmit-1.2, K08H10.6, hmit-1.3, K08F9.1, Y61A9LA.1, C35A11.4, hmit-1.1, Y37A1A.3	Y61A9LA.1		H(+) MyoInositol coTransporter [Source:UniProtKB/TrEMBL;Acc:Q9XXQ9]
ENSG00000127586	CHTF18	K08F4.1	K08F4.1
ENSG00000220474, ENSG00000182327, ENSG00000224051	CPTP, GLTPD2	K08E4.2, tag-296, F49D11.10	tag-296
ENSG00000164440, ENSG00000131002, ENSG00000084652, ENSG00000086712	TXLNB, TXLNA, TXLNGY, TXLNG	T22C1.6	T22C1.6
ENSG00000144233, ENSG00000101935	AMMECR1L, AMMECR1	R166.3	R166.3
ENSG00000159753, ENSG00000186648, ENSG00000079691	LRRC16A, LRRC16B, RLTPR	crml-1	crml-1		CARMIL (Capping, ARp2/3, Myosin I Linker protein) homolog [Source:UniProtKB/TrEMBL;Acc:Q21301]
ENSG00000226400, ENSG00000090372, ENSG00000196792, ENSG00000115808	STRN4, STRN, CTD-2269E23.2, STRN3	cash-1	cash-1	STRN4	CKA And Striatin Homolog [Source:UniProtKB/TrEMBL;Acc:G5EE12]
ENSG00000101361, ENSG00000235796	NOP56	K07C5.4	K07C5.4		Uncharacterized NOP5 family protein K07C5.4 [Source:UniProtKB/Swiss-Prot;Acc:Q21276]
ENSG00000005156	LIG3	K07C5.3	K07C5.3
ENSG00000143476	DTL	cdt-2	cdt-2		CDT (S. pombe CDC10 Dependent Transcript) homolog [Source:UniProtKB/TrEMBL;Acc:Q22059]
ENSG00000131747, ENSG00000077097	TOP2A, TOP2B	R05D3.12, top-2, cin-4	top-2		Putative DNA topoisomerase 2, mitochondrial [Source:UniProtKB/Swiss-Prot;Acc:P34534]
ENSG00000107669	ATE1	K07A1.9	K07A1.9
ENSG00000213341, ENSG00000143466, ENSG00000183735, ENSG00000104365	TBK1, IKBKB, CHUK	Y39G8B.5, ikke-1	ikke-1	TBK1
ENSG00000102144, ENSG00000170950, ENSG00000269666	PGK1, PGK2	pgk-1	pgk-1		Probable phosphoglycerate kinase [Source:UniProtKB/Swiss-Prot;Acc:P91427]
ENSG00000160695	VPS11	vps-11	vps-11		Vacuolar protein sorting-associated protein 11 homolog [Source:UniProtKB/Swiss-Prot;Acc:Q09600]
ENSG00000162688	AGL	agl-1	agl-1		AGL (Amylo-1,6-GLucosidase, 4-alpha-glucanotransferase) glycogen debranching enzyme [Source:UniProtKB/TrEMBL;Acc:O62334]
ENSG00000109452, ENSG00000040933	INPP4A, INPP4B	R01H10.7	R01H10.7		Inositol polyphosphate-4-phosphatase [Source:UniProtKB/TrEMBL;Acc:Q8MUM1]
ENSG00000181035, ENSG00000122912	SLC25A42, SLC25A16	F43G9.3	F43G9.3
ENSG00000166579, ENSG00000072864	NDEL1, NDE1	nud-2	nud-2		Aspergillus NUclear Division related [Source:UniProtKB/TrEMBL;Acc:O45717]
ENSG00000107036	RIC1	R06F6.8	R06F6.8		Guanine nucleotide exchange factor subunit R06F6.8 [Source:UniProtKB/Swiss-Prot;Acc:Q09417]
ENSG00000197121	PGAP1	T19B10.8	T19B10.8
ENSG00000141002	TCF25	K07A12.1	K07A12.1
ENSG00000032444, ENSG00000130653	PNPLA6, PNPLA7	M110.7, ZK370.4	ZK370.4		Uncharacterized NTE family protein M110.7 [Source:UniProtKB/Swiss-Prot;Acc:Q21534]
ENSG00000139990	DCAF5	R11D1.1	R11D1.1
ENSG00000100138	SNU13	M28.5	M28.5		NHP2-like protein 1 homolog [Source:UniProtKB/Swiss-Prot;Acc:Q21568]
ENSG00000166140	ZFYVE19	R11D1.10	R11D1.10
ENSG00000167986	DDB1	ddb-1	ddb-1		DNA damage-binding protein 1 [Source:UniProtKB/Swiss-Prot;Acc:Q21554]
ENSG00000132824, ENSG00000111897, ENSG00000184716, ENSG00000168528, ENSG00000164300	SERINC3, SERINC2, SERINC5, SERINC4, SERINC1	Y57E12AL.1, R11H6.2	Y57E12AL.1, R11H6.2	SERINC1, SERINC3
ENSG00000197548	ATG7	atg-7	atg-7		AuTophaGy (Yeast Atg homolog) [Source:UniProtKB/TrEMBL;Acc:G5EBK4]
ENSG00000107185	RGP1	M01F1.9	M01F1.9
ENSG00000091622, ENSG00000090975, ENSG00000180957, ENSG00000110697, ENSG00000174238	PITPNM3, PITPNB, PITPNM2, PITPNA, PITPNM1	pitp-1, Y54F10AR.1	Y54F10AR.1		PhosphatidylInositol Transfer Protein family [Source:UniProtKB/TrEMBL;Acc:G5EED9]
ENSG00000106771	TMEM245	M01F1.4	M01F1.4
ENSG00000105793, ENSG00000101181	GTPBP10, MTG2	C26E6.12, M01E5.2	C26E6.12
ENSG00000142892	PIGK	hpo-4	hpo-4		Putative GPI-anchor transamidase [Source:UniProtKB/Swiss-Prot;Acc:P49048]
ENSG00000120688	WBP4	F56G4.4	F56G4.4
ENSG00000101464	PIGU	T22C1.3	T22C1.3
ENSG00000197969, ENSG00000129003	VPS13A, VPS13C	T08G11.1	T08G11.1
ENSG00000187555	USP7	math-33	math-33		Ubiquitin carboxyl-terminal hydrolase 7 [Source:UniProtKB/Swiss-Prot;Acc:Q7JKC3]
ENSG00000204310, ENSG00000226467, ENSG00000169692, ENSG00000206324, ENSG00000235758, ENSG00000227642, ENSG00000236873, ENSG00000228892, ENSG00000206255	AGPAT2, AGPAT1	acl-2, acl-1	acl-2		Putative 1-acyl-sn-glycerol-3-phosphate acyltransferase acl-2 [Source:UniProtKB/Swiss-Prot;Acc:Q22267]
ENSG00000157800, ENSG00000134955, ENSG00000160190	SLC37A1, SLC37A3, SLC37A2	T11G6.3, T11G6.2, T10C6.6, T11G6.4	T10C6.6
ENSG00000167548, ENSG00000055609	KMT2C, KMT2D	set-16	set-16	KMT2C, KMT2D	Histone-lysine N-methyltransferase [Source:UniProtKB/TrEMBL;Acc:G5EGI1]
ENSG00000204195, ENSG00000166391, ENSG00000124003, ENSG00000205267, ENSG00000106384, ENSG00000062282, ENSG00000184210	MOGAT2, DGAT2L7P, MOGAT3, DGAT2L6, AWAT1, MOGAT1, DGAT2	dgtr-1, K07B1.4, F59A1.10, Y53G8B.2	dgtr-1, K07B1.4		DGAT (Acyl-CoA:DiacylGlycerol AcylTransferase) Related [Source:UniProtKB/TrEMBL;Acc:Q23067]
ENSG00000112893, ENSG00000196547	MAN2A1, MAN2A2	aman-2, aman-3	aman-2		Alpha-mannosidase [Source:UniProtKB/TrEMBL;Acc:Q2PJ74]
ENSG00000168924, ENSG00000165046	LETM2, LETM1	letm-1	letm-1		LETM1 (Leucine zipper, EF-hand, TransMembrane mitochondrial protein) homolog [Source:UniProtKB/TrEMBL;Acc:Q9XVM0]
ENSG00000204256, ENSG00000235307, ENSG00000164366, ENSG00000137948, ENSG00000141867, ENSG00000234704, ENSG00000234507, ENSG00000230678, ENSG00000169925, ENSG00000215077	CCDC127, BRD3, BRD2, BRDT, BRD4	bet-2, F59F5.7, bet-1	bet-1	BRD3, BRD2	BET (Two bromodomains) family protein [Source:UniProtKB/TrEMBL;Acc:Q20948]
ENSG00000123297	TSFM	tsfm-1	tsfm-1		Elongation factor Ts, mitochondrial [Source:UniProtKB/Swiss-Prot;Acc:Q20819]
ENSG00000170473	PYM1	T20G5.9	T20G5.9
ENSG00000119820	YIPF4	Y60A3A.19, T08D2.6	Y60A3A.19
ENSG00000148154	UGCG	cgt-3, cgt-2, cgt-1	cgt-3	UGCG	Ceramide glucosyltransferase 3 [Source:UniProtKB/Swiss-Prot;Acc:Q21054]
ENSG00000088930, ENSG00000114127	XRN1, XRN2	xrn-2, xrn-1	xrn-1		5'-3' exoribonuclease 2 homolog [Source:UniProtKB/Swiss-Prot;Acc:Q9U299]
ENSG00000116830, ENSG00000071794	TTF2, HLTF	F59A7.8, Y113G7B.14, F54E12.2, T23H2.3	F54E12.2, T23H2.3
ENSG00000105197	TIMM50	scpl-4	scpl-4		Mitochondrial import inner membrane translocase subunit TIM50 [Source:UniProtKB/Swiss-Prot;Acc:Q22647]
ENSG00000106615, ENSG00000167550	RHEBL1, RHEB	rheb-1	rheb-1	RHEB	GTP-binding protein Rheb homolog 1 [Source:UniProtKB/Swiss-Prot;Acc:P34443]
ENSG00000144048	DUSP11	pir-1, F54C8.4	pir-1		Phosphatase Interacting with RNA/RNP [Source:UniProtKB/TrEMBL;Acc:Q22707]
ENSG00000107672	NSMCE4A	H21P03.2	H21P03.2	NSMCE4A
ENSG00000166887	VPS39	vps-39	vps-39		Related to yeast Vacuolar Protein Sorting factor [Source:UniProtKB/TrEMBL;Acc:Q9XUQ4]
ENSG00000229048, ENSG00000128951	DUT, DUTP1	dut-1	dut-1		DeoxyUTPase; Deoxyuridinetriphosphatase [Source:UniProtKB/TrEMBL;Acc:G5EET2]
ENSG00000001167	NFYA	nfya-1, nfya-2	nfya-2		Nuclear transcription Factor Y, A (Alpha) subunit [Source:UniProtKB/TrEMBL;Acc:G5EEG1]
ENSG00000172992	DCAKD	T05G5.5	T05G5.5		Dephospho-CoA kinase 1 [Source:UniProtKB/TrEMBL;Acc:E5QCF6]
ENSG00000141252	VPS53	vps-53	vps-53		Vacuolar protein sorting-associated protein 53 homolog [Source:UniProtKB/Swiss-Prot;Acc:P34561]
ENSG00000138138	ATAD1	mspn-1	mspn-1	ATAD1	Mitochondrial sorting homolog [Source:UniProtKB/Swiss-Prot;Acc:P54815]
ENSG00000185189, ENSG00000115216	NRBP2, NRBP1	hpo-11	hpo-11
ENSG00000165775, ENSG00000182814, ENSG00000069509	FUNDC2, FUNDC1, FUNDC2P2	T06D8.7	T06D8.7
ENSG00000160949	TONSL	K02B12.5	K02B12.5
ENSG00000138073	PREB	sec-12	sec-12		Yeast SEC homolog [Source:UniProtKB/TrEMBL;Acc:Q21115]
ENSG00000154813	DPH3	dph-3	dph-3		DPH3 homolog [Source:UniProtKB/Swiss-Prot;Acc:Q21102]
ENSG00000105058	FAM32A	K01G5.8	K01G5.8
ENSG00000114491	UMPS	R12E2.11, umps-1	R12E2.11		Orotate phosphoribosyltransferase [Source:UniProtKB/Swiss-Prot;Acc:O61790]
ENSG00000164933	SLC25A32	K01C8.7	K01C8.7
ENSG00000180098, ENSG00000137434	TRNAU1AP, C6orf52	T07F10.3	T07F10.3
ENSG00000056050	C4orf27	JC8.7	JC8.7
ENSG00000100150	DEPDC5	T08A11.1	T08A11.1
ENSG00000172269	DPAGT1	Y60A3A.14, Y60A3A.8, D1005.2, T08D2.2	Y60A3A.8
ENSG00000087111	PIGS	hpo-5	hpo-5
ENSG00000182107, ENSG00000235156, ENSG00000112697	TMEM30B, TMEM30C, TMEM30A	F20C5.4, chat-1	chat-1	TMEM30A
ENSG00000198554	WDHD1	F17C11.10	F17C11.10
ENSG00000124201	ZNFX1	ZK1067.2	ZK1067.2
ENSG00000165280	VCP	cdc-48.1, cdc-48.2	cdc-48.2		Transitional endoplasmic reticulum ATPase homolog 1 [Source:UniProtKB/Swiss-Prot;Acc:P54811]
ENSG00000135945	REV1	rev-1	rev-1		DNA repair protein REV1 [Source:UniProtKB/TrEMBL;Acc:Q09615]
ENSG00000196943	NOP9	ZK792.5	ZK792.5
ENSG00000168738, ENSG00000154864, ENSG00000103335, ENSG00000175388	PIEZO2, PIEZO1	T20D3.11, C10C5.1	C10C5.1
ENSG00000132780	NASP	nasp-2, nasp-1	nasp-2		NASP (Human Nuclear Autoantigenic Sperm Protein) homolog [Source:UniProtKB/TrEMBL;Acc:O17687]
ENSG00000132768	DPH2	dph-2	dph-2		2-(3-amino-3-carboxypropyl)histidine synthase subunit 2 [Source:UniProtKB/Swiss-Prot;Acc:Q09454]
ENSG00000164008	C1orf50	C08B11.9	C08B11.9
ENSG00000189079	ARID2	swsn-7	swsn-7	ARID2	SWI/SNF nucleosome remodeling complex component [Source:UniProtKB/Swiss-Prot;Acc:Q09441]
ENSG00000183155	RABIF	ZK970.8, mdt-9	mdt-9
ENSG00000220023, ENSG00000225566, ENSG00000109536, ENSG00000149531	FRG1BP, FRG1	frg-1	frg-1		Protein FRG1 homolog [Source:UniProtKB/Swiss-Prot;Acc:O18282]
ENSG00000084090	STARD7	C06H2.2	C06H2.2
ENSG00000111358	GTF2H3	ZK1128.4	ZK1128.4
ENSG00000172775	FAM192A	C25A1.1	C25A1.1
ENSG00000235254, ENSG00000155984	TMEM185AP1	Y116A8C.9	Y116A8C.9
ENSG00000117616, ENSG00000163714, ENSG00000167978, ENSG00000159140	U2SURP, SRRM2, RSRP1, SON	C04G2.8, rsr-2, C10G11.9, C07H6.4, D1037.1, T27A3.4	C07H6.4	RSRP1, SON	SR protein related [Source:UniProtKB/TrEMBL;Acc:Q9U213]
ENSG00000111237	VPS29	vps-29	vps-29		Vacuolar protein sorting-associated protein 29 [Source:UniProtKB/TrEMBL;Acc:Q9XVX5]
ENSG00000145041	VPRBP	dcaf-1	dcaf-1		DDB1- and CUL4-associated factor homolog 1 [Source:UniProtKB/Swiss-Prot;Acc:Q21106]
ENSG00000177602	GSG2	Y18H1A.10, Y40A1A.1, C01H6.9, F22H10.5	C01H6.9
ENSG00000162613, ENSG00000088247, ENSG00000107164	FUBP1, KHSRP, FUBP3	ZK418.9, C12D8.1, M01A10.1, C36E6.1	ZK418.9, C12D8.1
ENSG00000112640, ENSG00000078304, ENSG00000154001, ENSG00000068971, ENSG00000066027	PPP2R5D, PPP2R5B, PPP2R5C, PPP2R5A, PPP2R5E	pptr-1, pptr-2	pptr-1		Serine/threonine-protein phosphatase 2A regulatory subunit pptr-1 [Source:UniProtKB/Swiss-Prot;Acc:O18178]
ENSG00000173209, ENSG00000100591	AHSA2, AHSA1	C01G10.8	C01G10.8
ENSG00000129187	DCTD	ZK643.2	ZK643.2		Probable deoxycytidylate deaminase [Source:UniProtKB/Swiss-Prot;Acc:P30648]
ENSG00000140307	GTF2A2	B0336.13, Y111B2A.13	B0336.13		Transcription initiation factor IIA small chain homolog [Source:UniProtKB/Swiss-Prot;Acc:Q9BIB4]
ENSG00000112796, ENSG00000001561, ENSG00000197594, ENSG00000136960, ENSG00000182156, ENSG00000154269, ENSG00000164303	ENPP1, ENPP7, ENPP6, ENPP4, ENPP3, ENPP2, ENPP5	T03G6.3, C27A7.3, C27A7.1, F13H10.5, C01B10.9	C01B10.9	ENPP2
ENSG00000137992	DBT	ZK669.4	ZK669.4
ENSG00000163029	SMC6	smc-6, C23H4.6	smc-6		Structural maintenance of chromosomes protein 6 homolog smc-6 [Source:UniProtKB/Swiss-Prot;Acc:G5EG17]
ENSG00000154556, ENSG00000147010, ENSG00000198087, ENSG00000120896, ENSG00000095637, ENSG00000214193	SH3D21, CD2AP, SORBS2, SORBS1, SH3KBP1, SORBS3	Y44E3A.4, sorb-1	Y44E3A.4	SORBS2, SORBS1
ENSG00000092094, ENSG00000128694	OSGEPL1, OSGEP	C01G10.10, Y71H2AM.1	Y71H2AM.1		Probable tRNA N6-adenosine threonylcarbamoyltransferase, mitochondrial [Source:UniProtKB/Swiss-Prot;Acc:Q93170]
ENSG00000125246	CLYBL	C01G10.7	C01G10.7
ENSG00000010256, ENSG00000105819	UQCRC1, PMPCB	ucr-1, mppb-1	mppb-1		Cytochrome b-c1 complex subunit 1, mitochondrial [Source:UniProtKB/Swiss-Prot;Acc:P98080]
ENSG00000126653	NSRP1	ccdc-55	ccdc-55		Nuclear speckle splicing regulatory protein 1 homolog [Source:UniProtKB/Swiss-Prot;Acc:Q09252]
ENSG00000137522, ENSG00000145428	RNF175, RNF121	rnf-121	rnf-121		RING finger protein 121 [Source:RefSeq peptide;Acc:NP_497832]
ENSG00000169895	SYAP1	C16C2.4	C16C2.4
ENSG00000123213, ENSG00000172009	NLN, THOP1	ZK550.3	ZK550.3
ENSG00000198855	FICD	fic-1	fic-1		Adenosine monophosphate-protein transferase FICD homolog [Source:UniProtKB/Swiss-Prot;Acc:Q23544]
ENSG00000152520	PAN3	panl-3	panl-3		PAB-dependent poly(A)-specific ribonuclease subunit PAN3 [Source:UniProtKB/Swiss-Prot;Acc:P34653]
ENSG00000033030	ZCCHC8	ZK632.11, Y34D9A.7	ZK632.11	ZCCHC8
ENSG00000129636	ITFG1	tag-256	tag-256	ITFG1
ENSG00000196511	TPK1	tpk-1	tpk-1		Thiamin pyrophosphokinase 1 [Source:UniProtKB/Swiss-Prot;Acc:P30636]
ENSG00000154839	SKA1	ska-1	ska-1		Spindle and kinetochore-associated protein 1 [Source:UniProtKB/Swiss-Prot;Acc:Q9XWS0]
ENSG00000112984, ENSG00000137807, ENSG00000138182	KIF20A, KIF23, KIF20B	zen-4	zen-4		Kinesin-like protein [Source:UniProtKB/TrEMBL;Acc:G5EG83]
ENSG00000081721	DUSP12	C24F3.2	C24F3.2
ENSG00000080603, ENSG00000183495, ENSG00000185684	SRCAP, EP400, EP400NL	ssl-1	ssl-1	EP400	Helicase ssl-1 [Source:UniProtKB/Swiss-Prot;Acc:Q9NEL2]
ENSG00000118454	ANKRD13C	C01F1.6	C01F1.6
ENSG00000198690	FAN1	fan-1	fan-1		Fanconi-associated nuclease 1 homolog [Source:UniProtKB/Swiss-Prot;Acc:P90740]
ENSG00000168175	MAPK1IP1L	C02B10.5	C02B10.5
ENSG00000103549, ENSG00000155827	RNF20, RNF40	rfp-1	rfp-1		E3 ubiquitin-protein ligase bre-1 [Source:UniProtKB/Swiss-Prot;Acc:P34537]
ENSG00000134709, ENSG00000095066, ENSG00000168172	HOOK3, HOOK1, HOOK2	zyg-12	zyg-12		Zygote defective protein 12 [Source:UniProtKB/Swiss-Prot;Acc:Q23529]
ENSG00000203995, ENSG00000162378	ZYG11B, ZYG11A	zyg-11	zyg-11	ZYG11B	Early embryogenesis protein zyg-11 [Source:UniProtKB/Swiss-Prot;Acc:P21541]
ENSG00000175216	CKAP5	zyg-9, T08D2.8	zyg-9		Zygote defective protein 9 [Source:UniProtKB/Swiss-Prot;Acc:G5EEM5]
ENSG00000169490	TM2D2	C02F5.13	C02F5.13		TM2 domain-containing protein C02F5.13 [Source:UniProtKB/Swiss-Prot;Acc:P61228]
ENSG00000215277	RNF212B	zhp-3, D1081.9	zhp-3, D1081.9		Zip (Yeast meiotic zipper) Homologous Protein [Source:UniProtKB/TrEMBL;Acc:C6KRL6]
ENSG00000101901	ALG13	hpo-17	hpo-17
ENSG00000136936	XPA	xpa-1	xpa-1		XPA (Xeroderma pigmentosum comp grp A) related [Source:UniProtKB/TrEMBL;Acc:Q21302]
ENSG00000230462, ENSG00000167433, ENSG00000225485, ENSG00000214627, ENSG00000107863	ARHGAP21	pac-1	pac-1		GTPase-activating protein pac-1 [Source:UniProtKB/Swiss-Prot;Acc:P34288]
ENSG00000139719, ENSG00000184056	VPS33A, VPS33B	vps-33.1, vps-33.2	vps-33.1, vps-33.2		Vacuolar protein sorting-associated protein 33A [Source:UniProtKB/Swiss-Prot;Acc:P34260]
ENSG00000205544	TMEM256	Y106G6H.8	Y106G6H.8
ENSG00000169230	PRELID1	B0334.4	B0334.4
ENSG00000164244	PRRC1	C04G6.4	C04G6.4
ENSG00000112290, ENSG00000132970, ENSG00000158195	WASF3, WASF2, WASF1	wve-1	wve-1		WAVE (Actin cytoskeleton modulator) homolog [Source:UniProtKB/TrEMBL;Acc:F5GUF0]
ENSG00000106299, ENSG00000015285	WAS, WASL	wsp-1	wsp-1	WASL	WASP (Actin cytoskeleton modulator) homolog [Source:UniProtKB/TrEMBL;Acc:Q8MQE6]
ENSG00000125651	GTF2F1	C01F1.1	C01F1.1
ENSG00000136504, ENSG00000172977, ENSG00000103510, ENSG00000156650, ENSG00000083168	KAT5, KAT6B, KAT8, KAT7, KAT6A	mys-1, mys-2, lsy-12, mys-4	mys-1, mys-2, lsy-12, mys-4	KAT6B	Histone acetyltransferase Tip60 homolog [Source:UniProtKB/Swiss-Prot;Acc:Q9TYU5]
ENSG00000137824, ENSG00000115841	RMDN3, RMDN2	rmd-6, rmd-2, C16C8.18, rmd-5, rmd-3, rmd-1, rmd-4	rmd-1		Regulator of Microtubule Dynamics [Source:UniProtKB/TrEMBL;Acc:Q966G0]
ENSG00000100731, ENSG00000197136, ENSG00000135749, ENSG00000126773	PCNX, PCNXL4, PCNXL2, PCNXL3	B0511.12	B0511.12
ENSG00000143315	PIGM	B0491.1	B0491.1
ENSG00000146842	TMEM209	B0464.6	B0464.6
ENSG00000174547	MRPL11	mrpl-11	mrpl-11		Probable 39S ribosomal protein L11, mitochondrial [Source:UniProtKB/Swiss-Prot;Acc:P34264]
ENSG00000137207	YIPF3	Y53C12A.3	Y53C12A.3
ENSG00000152219	ARL14EP	B0336.5	B0336.5
ENSG00000164080	RAD54L2	rad-26	rad-26
ENSG00000198917	C9orf114	B0361.6	B0361.6		Putative methyltransferase B0361.6 [Source:UniProtKB/Swiss-Prot;Acc:Q10950]
ENSG00000058804, ENSG00000163354	NDC1, DCST2	npp-22, spe-42	npp-22		Nucleoporin ndc-1 [Source:UniProtKB/Swiss-Prot;Acc:Q8I4N3]
ENSG00000075856	SART3	B0035.12	B0035.12
ENSG00000149823	VPS51	vps-51	vps-51		Vacuolar protein sorting-associated protein 51 homolog [Source:UniProtKB/Swiss-Prot;Acc:O01839]
ENSG00000101132	PFDN4	pfd-4	pfd-4		Probable prefoldin subunit 4 [Source:UniProtKB/Swiss-Prot;Acc:Q17435]
ENSG00000196505, ENSG00000138496, ENSG00000172264, ENSG00000133315	PARP9, MACROD1, MACROD2, GDAP2	B0035.3	B0035.3
ENSG00000084463, ENSG00000010244, ENSG00000188863	WBP11, ZNF207	B0035.1, F33H1.3	B0035.1
ENSG00000091127, ENSG00000129317	PUS7L, PUS7	B0024.11	B0024.11		Putative pseudouridine synthase B0024.11 [Source:UniProtKB/Swiss-Prot;Acc:Q17426]
ENSG00000006282	SPATA20	B0495.5	B0495.5
ENSG00000112249, ENSG00000144028	ASCC3, SNRNP200	snrp-200, Y54E2A.4	snrp-200, Y54E2A.4		Putative U5 small nuclear ribonucleoprotein 200 kDa helicase [Source:UniProtKB/Swiss-Prot;Acc:Q9U2G0]
ENSG00000145912	NHP2	Y48A6B.3	Y48A6B.3		Putative H/ACA ribonucleoprotein complex subunit 2-like protein [Source:UniProtKB/Swiss-Prot;Acc:Q9XXD4]
ENSG00000143921, ENSG00000118777, ENSG00000172350, ENSG00000160179	ABCG1, ABCG8, ABCG2, ABCG4	wht-5, wht-8, wht-3, wht-4, wht-7, wht-2, wht-6, wht-1	wht-7, wht-2		WHiTe (Drosophila) related ABC transporter [Source:UniProtKB/TrEMBL;Acc:Q19585]
ENSG00000124370	MCEE	mce-1	mce-1		Methylmalonyl-CoA Epimerase; Mitochondrial methylmalonyl-CoA epimerase [Source:UniProtKB/TrEMBL;Acc:G5EEG4]
ENSG00000102575	ACP5	F02E9.7	F02E9.7
ENSG00000057757	PITHD1	ZK353.9	ZK353.9		PITH domain-containing protein ZK353.9 [Source:UniProtKB/Swiss-Prot;Acc:Q95ZI6]
ENSG00000176208	ATAD5	Y53F4B.9	Y53F4B.9
ENSG00000137200	CMTR1	Y53F4B.13	Y53F4B.13		Cap-specific mRNA (nucleoside-2'-O-)-methyltransferase 1 [Source:UniProtKB/Swiss-Prot;Acc:Q9NAA5]
ENSG00000147592	LACTB2	Y53F4B.39	Y53F4B.39		Beta-lactamase-like protein 2 homolog [Source:UniProtKB/Swiss-Prot;Acc:Q95Q18]
ENSG00000029639, ENSG00000086189	TFB1M, DIMT1	E02H1.1, T03F1.7	E02H1.1		Probable dimethyladenosine transferase [Source:UniProtKB/Swiss-Prot;Acc:Q09522]
ENSG00000168350, ENSG00000143753	DEGS1, DEGS2	ttm-5, F33D4.4	F33D4.4		Putative sphingolipid delta(4)-desaturase/C4-monooxygenase [Source:UniProtKB/Swiss-Prot;Acc:G5EC63]
ENSG00000141084, ENSG00000010017, ENSG00000167778	RANBP9, RANBP10, SPRYD3	Y54E5A.7	Y54E5A.7
ENSG00000009335	UBE3C	D2085.4	D2085.4
ENSG00000080007, ENSG00000184735	DDX53, DDX43	Y54G11A.3	Y54G11A.3
ENSG00000130165	ELOF1	Y54G11A.11	Y54G11A.11		Transcription elongation factor 1 homolog [Source:UniProtKB/Swiss-Prot;Acc:Q9XVZ8]
ENSG00000146005, ENSG00000125637, ENSG00000156011, ENSG00000059915	PSD4, PSD2, PSD, PSD3	efa-6	efa-6	PSD, PSD3	Exchange factor for Arf-6 [Source:UniProtKB/Swiss-Prot;Acc:G5EET6]
ENSG00000159579, ENSG00000164068	RSPRY1, RNF123	F16A11.1	F16A11.1
ENSG00000183066, ENSG00000132471	WBP2NL, WBP2	D2013.6, C18B2.4	D2013.6
ENSG00000085449, ENSG00000139668	WDFY2, WDFY1	wdfy-2	wdfy-2		WD repeat and FYVE domain-containing protein 2 [Source:UniProtKB/Swiss-Prot;Acc:Q18964]
ENSG00000096401	CDC5L	D1081.8	D1081.8
ENSG00000072954, ENSG00000095209	TMEM38A, TMEM38B	Y57A10A.28, Y57A10A.10	Y57A10A.28
ENSG00000165416	SUGT1	D1054.3	D1054.3
ENSG00000135932, ENSG00000102547	CAB39, CAB39L	mop-25.2, mop-25.1	mop-25.2	CAB39	MO25-like protein 2 [Source:UniProtKB/Swiss-Prot;Acc:O18211]
ENSG00000138760, ENSG00000135218, ENSG00000073060	SCARB1, SCARB2, CD36	scav-2, scav-4, scav-3, scav-6, scav-5, scav-1	scav-2		SCAVenger receptor (CD36 family) related [Source:UniProtKB/TrEMBL;Acc:G5EBM7]
ENSG00000119487	MAPKAP1	sinh-1	sinh-1		Stress-activated map kinase-interacting protein 1 homolog [Source:UniProtKB/Swiss-Prot;Acc:Q9NA80]
ENSG00000147144, ENSG00000151474, ENSG00000114541, ENSG00000163362	FRMD4B, CCDC120, C1orf106, FRMD4A	F07C6.4	F07C6.4
ENSG00000103502	CDIPT	pisy-1	pisy-1		CDP-diacylglycerol--inositol 3-phosphatidyltransferase [Source:UniProtKB/TrEMBL;Acc:Q9U2G1]
ENSG00000215443, ENSG00000124224, ENSG00000154845	PPP4R1, PPP4R1L	ppfr-1	ppfr-1		Protein Phosphatase Four Regulatory subunit [Source:UniProtKB/TrEMBL;Acc:G5ED93]
ENSG00000131711, ENSG00000166963, ENSG00000131016, ENSG00000130479	MAP1S, MAP1A, MAP1B, AKAP12	F25D7.4, C36A4.5, F32A7.5, tag-199	F25D7.4, C36A4.5	MAP1B
ENSG00000136891	TEX10	Y48A6C.4	Y48A6C.4
ENSG00000112367	FIG4	C34B7.2	C34B7.2
ENSG00000140521	POLG	polg-1	polg-1		POLG (Mitochondrial DNA POLymerase Gamma) [Source:UniProtKB/TrEMBL;Acc:Q9U208]
ENSG00000186280, ENSG00000107077, ENSG00000127663, ENSG00000235268, ENSG00000066135	KDM4A, KDM4D, KDM4E, KDM4C, KDM4B	jmjd-2	jmjd-2		Lysine-specific demethylase 4 [Source:UniProtKB/Swiss-Prot;Acc:Q9U297]
ENSG00000139637	C12orf10	C27H6.8	C27H6.8		UPF0160 protein C27H6.8 [Source:UniProtKB/Swiss-Prot;Acc:O17606]
ENSG00000126062	TMEM115	F11A10.6	F11A10.6
ENSG00000004866, ENSG00000007341	ST7, ST7L	F11A10.5	F11A10.5		Protein ST7 homolog [Source:UniProtKB/Swiss-Prot;Acc:Q19337]
ENSG00000180628, ENSG00000056661, ENSG00000185619, ENSG00000168283, ENSG00000156374, ENSG00000115289	BMI1, PCGF6, PCGF1, PCGF5, PCGF3	mig-32	mig-32
ENSG00000143919, ENSG00000087884	AAMDC, CAMKMT	Y48E1C.1	Y48E1C.1
ENSG00000062822	POLD1	F10C2.4	F10C2.4		DNA polymerase delta catalytic subunit [Source:UniProtKB/Swiss-Prot;Acc:P90829]
ENSG00000185085	INTS5	Y51A2D.7	Y51A2D.7
ENSG00000166136	NDUFB8	Y51H1A.3	Y51H1A.3
ENSG00000153487, ENSG00000168395, ENSG00000168556, ENSG00000071243, ENSG00000111653	ING4, ING1, ING2, ING5, ING3	lsy-13, ing-3	ing-3	ING1
ENSG00000065615	CYB5R4	Y52B11A.3	Y52B11A.3
ENSG00000140905	GCSH	gcsh-1, F52A8.5	F52A8.5		Glycine cleavage system H protein [Source:UniProtKB/TrEMBL;Acc:O62122]
ENSG00000058729	RIOK2	riok-2	riok-2		Serine/threonine-protein kinase RIO2 [Source:UniProtKB/Swiss-Prot;Acc:Q95Q34]
ENSG00000078618, ENSG00000119912	IDE, NRD1	C02G6.2, F44E7.4, Y70C5C.1, C28F5.4, C02G6.1	F44E7.4
ENSG00000070610	GBA2	R08F11.1, hpo-13	hpo-13		Non-lysosomal glucosylceramidase [Source:UniProtKB/TrEMBL;Acc:O01893]
ENSG00000232297, ENSG00000103472, ENSG00000085721, ENSG00000179038	RRN3P2, RRN3, RP11-157K17.5	C36E8.1	C36E8.1
ENSG00000111231	GPN3	Y75B8A.14	Y75B8A.14
ENSG00000188985, ENSG00000178700, ENSG00000228716	DHFRL1, DHFR, DHFRP1	dhfr-1	dhfr-1		Putative dihydrofolate reductase [Source:UniProtKB/Swiss-Prot;Acc:Q93341]
ENSG00000102978	POLR2C	rpb-3	rpb-3		RNA Polymerase II (B) subunit [Source:UniProtKB/TrEMBL;Acc:Q93338]
ENSG00000197355, ENSG00000117143	UAP1, UAP1L1	C36A4.4, K06B9.2	C36A4.4		Probable UDP-N-acetylglucosamine pyrophosphorylase [Source:UniProtKB/Swiss-Prot;Acc:Q18493]
ENSG00000197142, ENSG00000123983, ENSG00000151726, ENSG00000068366, ENSG00000164398	ACSL1, ACSL4, ACSL6, ACSL3, ACSL5	acs-17, acs-5, acs-13, acs-4	acs-4	ACSL3	Fatty Acid CoA Synthetase family [Source:UniProtKB/TrEMBL;Acc:Q18660]
ENSG00000128829	EIF2AK4	gcn-2	gcn-2		Eukaryotic translation initiation factor 2-alpha kinase gcn-2 [Source:UniProtKB/Swiss-Prot;Acc:D0Z5N4]
ENSG00000125703, ENSG00000130734, ENSG00000168397, ENSG00000101844	ATG4B, ATG4A, ATG4C, ATG4D	atg-4.2, atg-4.1	atg-4.1		Cysteine protease [Source:UniProtKB/TrEMBL;Acc:Q9U1N6]
ENSG00000105220	GPI	gpi-1	gpi-1		Glucose-6-phosphate isomerase [Source:UniProtKB/TrEMBL;Acc:Q7K707]
ENSG00000151470	C4orf33	C33A12.3	C33A12.3
ENSG00000025800, ENSG00000186432, ENSG00000196911, ENSG00000114030, ENSG00000102753	KPNA3, KPNA4, KPNA5, KPNA6, KPNA1	ima-3	ima-3		Importin subunit alpha-3 [Source:UniProtKB/Swiss-Prot;Acc:Q19969]
ENSG00000165169, ENSG00000146425	DYNLT3, DYNLT1	dylt-3, dylt-1	dylt-1		DYnein Light chain (Tctex type) [Source:UniProtKB/TrEMBL;Acc:Q22226]
ENSG00000184983	NDUFA6	nuo-3	nuo-3		NADH Ubiquinone Oxidoreductase [Source:UniProtKB/TrEMBL;Acc:O18236]
ENSG00000144589, ENSG00000010322	NISCH, STK11IP	F13E9.1	F13E9.1
ENSG00000131773, ENSG00000112232, ENSG00000121774	KHDRBS2, KHDRBS3, KHDRBS1	Y69A2AR.32, B0280.17, Y57G11C.36, K07H8.9	Y69A2AR.32, Y57G11C.36, K07H8.9
ENSG00000125633	CCDC93	C31E10.5, C31E10.6, C16A11.2	C31E10.5
ENSG00000244462, ENSG00000183808	RBM12B, RBM12	Y106G6D.7	Y106G6D.7
ENSG00000138382	METTL5	C38D4.9	C38D4.9
ENSG00000040531	CTNS	ctns-1	ctns-1		Cystinosin homolog [Source:UniProtKB/Swiss-Prot;Acc:Q09500]
ENSG00000146373	RNF217	Y57A10A.31	Y57A10A.31
ENSG00000066279	ASPM	aspm-1	aspm-1
ENSG00000130313	PGLS	Y57G11C.3	Y57G11C.3		Putative 6-phosphogluconolactonase [Source:UniProtKB/Swiss-Prot;Acc:O18229]
ENSG00000118518	RNF146	C55A6.1, Y105E8A.14, C26B9.6, C02B8.6	C55A6.1
ENSG00000100568, ENSG00000151532	VTI1B, VTI1A	vti-1	vti-1		VTI (Vesicle Transport through t-SNARE Interaction) homolog [Source:UniProtKB/TrEMBL;Acc:O18230]
ENSG00000155265, ENSG00000147533	GOLGA7B, GOLGA7	Y57G11C.33	Y57G11C.33
ENSG00000027001	MIPEP	Y67H2A.7	Y67H2A.7
ENSG00000101161	PRPF6	prp-6	prp-6		Yeast PRP (Splicing factor) related [Source:UniProtKB/TrEMBL;Acc:Q9GRZ2]
ENSG00000188026, ENSG00000167705, ENSG00000150977	RILPL2, RILP, RILPL1	rilp-1	rilp-1		RILP (Rab7-Interacting Lysosomal Protein) homolog [Source:UniProtKB/TrEMBL;Acc:G5EDL7]
ENSG00000183828	NUDT14	C50F4.16	C50F4.16
ENSG00000181830	SLC35C1	nstp-10, nstp-9	nstp-10		GDP-fucose transporter [Source:UniProtKB/Swiss-Prot;Acc:Q968A5]
ENSG00000146733	PSPH	Y62E10A.13	Y62E10A.13
ENSG00000110075, ENSG00000105063, ENSG00000100239	PPP6R2, PPP6R3, PPP6R1	saps-1	saps-1		SAPS (Phosphatase associated) domain protein [Source:UniProtKB/TrEMBL;Acc:Q18696]
ENSG00000164187	LMBRD2	C47G2.4	C47G2.4		LMBR1 domain-containing protein 2 homolog [Source:UniProtKB/Swiss-Prot;Acc:Q18695]
ENSG00000177370	TIMM22	C47G2.3	C47G2.3		Mitochondrial import inner membrane translocase subunit tim-22 [Source:UniProtKB/Swiss-Prot;Acc:Q9NAQ9]
ENSG00000167272	POP5	Y66A7A.2	Y66A7A.2		Ribonuclease P/MRP protein subunit POP5 [Source:UniProtKB/TrEMBL;Acc:G5EF59]
ENSG00000158411	MITD1	Y66D12A.10	Y66D12A.10
ENSG00000162604	TM2D1	Y66D12A.21	Y66D12A.21		TM2 domain-containing protein Y66D12A.21 [Source:UniProtKB/Swiss-Prot;Acc:Q95PJ8]
ENSG00000134759	ELP2	elpc-2	elpc-2		ELongator complex Protein Component [Source:UniProtKB/TrEMBL;Acc:Q9NEW7]
ENSG00000204764, ENSG00000130227	XPO7, RANBP17	C35A5.8	C35A5.8
ENSG00000136167, ENSG00000072110, ENSG00000130402, ENSG00000077522, ENSG00000102024, ENSG00000120756	PLS1, ACTN4, ACTN1, PLS3, LCP1, ACTN2	atn-1, plst-1, Y73B3B.1	plst-1		AcTiniN [Source:UniProtKB/TrEMBL;Acc:H2L2C8]
ENSG00000116459	ATP5F1	asb-2, asb-1	asb-1		ATP Synthase B homolog [Source:UniProtKB/TrEMBL;Acc:Q19126]
ENSG00000163950	SLBP	cdl-1	cdl-1		Histone RNA hairpin-binding protein [Source:UniProtKB/Swiss-Prot;Acc:Q09599]
ENSG00000132964, ENSG00000155111	CDK8, CDK19	cdk-8	cdk-8		Cyclin-dependent kinase 8 [Source:UniProtKB/Swiss-Prot;Acc:P90866]
ENSG00000183207	RUVBL2	ruvb-2	ruvb-2		RuvB-like 2 [Source:UniProtKB/Swiss-Prot;Acc:Q9GZH2]
ENSG00000105202, ENSG00000188573	FBL, FBLL1	fib-1	fib-1		rRNA 2'-O-methyltransferase fibrillarin [Source:UniProtKB/Swiss-Prot;Acc:Q22053]
ENSG00000163644, ENSG00000163590, ENSG00000175175, ENSG00000100034	PPM1E, PPM1K, PPM1L, PPM1F	fem-2	fem-2		Ca(2+)/calmodulin-dependent protein kinase phosphatase [Source:UniProtKB/Swiss-Prot;Acc:P49594]
ENSG00000116675, ENSG00000178950, ENSG00000204113, ENSG00000115977, ENSG00000138756	DNAJC6, BMP2K, GAK, AAK1, BMP2KL	dnj-25, sel-5, tag-257	sel-5	DNAJC6	Auxilin; DNaJ domain (Prokaryotic heat shock protein) [Source:UniProtKB/TrEMBL;Acc:G5EDJ6]
ENSG00000213551	DNAJC9	dnj-23	dnj-23		DNaJ domain (Prokaryotic heat shock protein) [Source:UniProtKB/TrEMBL;Acc:Q22751]
ENSG00000120805	ARL1	arl-1	arl-1		ADP-ribosylation factor-like protein 1 [Source:UniProtKB/Swiss-Prot;Acc:Q20758]
ENSG00000071655, ENSG00000237247, ENSG00000205718, ENSG00000170948, ENSG00000182315, ENSG00000134046	MBD3L4, MBD3L1, MBD3, MBD3L3, MBD2, MBD3L5	mbd-2	mbd-2	MBD2	Methyl-CpG BinDing protein; Methyl-binding protein-2 [Source:UniProtKB/TrEMBL;Acc:G5ECR1]
ENSG00000165527	ARF6	arf-6	arf-6		ADP-Ribosylation Factor related [Source:UniProtKB/TrEMBL;Acc:Q9U2S4]
ENSG00000073464, ENSG00000109572, ENSG00000171365	CLCN4, CLCN5, CLCN3	clh-5	clh-5	CLCN4	Chloride channel protein [Source:UniProtKB/TrEMBL;Acc:G5EGT4]
ENSG00000145780, ENSG00000141965, ENSG00000169018	FEM1C, FEM1B, FEM1A	fem-1	fem-1		Sex-determining protein fem-1 [Source:UniProtKB/Swiss-Prot;Acc:P17221]
ENSG00000168724	DNAJC21	dnj-17	dnj-17		DNaJ domain (Prokaryotic heat shock protein) [Source:UniProtKB/TrEMBL;Acc:O62360]
ENSG00000108504, ENSG00000164885, ENSG00000170312, ENSG00000123374	CDK1, CDK2, CDK5	cdk-2, cdk-1, cdk-5	cdk-2, cdk-1		Cyclin-dependent kinase 2 [Source:UniProtKB/Swiss-Prot;Acc:O61847]
ENSG00000127588	GNG13	gpc-2	gpc-2		G Protein, Gamma subunit; Heterotrimeric G protein gamma subunit 2 [Source:UniProtKB/TrEMBL;Acc:G5ECT6]
ENSG00000100726	TELO2	clk-2	clk-2		Telomere length regulation protein clk-2 [Source:UniProtKB/Swiss-Prot;Acc:Q95YE9]
ENSG00000136807	CDK9	cdk-9	cdk-9		Probable cyclin-dependent kinase 9 [Source:UniProtKB/Swiss-Prot;Acc:Q9TVL3]
ENSG00000135040	NAA35	T23B12.4	T23B12.4
ENSG00000094804, ENSG00000085840	CDC6, ORC1	cdc-6, orc-1	cdc-6		Cell Division Cycle related [Source:UniProtKB/TrEMBL;Acc:P91155]
ENSG00000145715	RASA1	gap-3	gap-3		GTPase Activating Protein family [Source:UniProtKB/TrEMBL;Acc:Q95XA9]
ENSG00000101224, ENSG00000158402, ENSG00000164045	CDC25A, CDC25B, CDC25C	cdc-25.1, cdc-25.3, cdc-25.4, cdc-25.2	cdc-25.1		M-phase inducer phosphatase cdc-25.1 [Source:UniProtKB/Swiss-Prot;Acc:O44552]
ENSG00000131375	CAPN7	clp-2	clp-2		CaLPain family [Source:UniProtKB/TrEMBL;Acc:Q22143]
ENSG00000160445	ZER1	zer-1	zer-1		Zyg eleven-related protein 1 [Source:UniProtKB/Swiss-Prot;Acc:Q2WF59]
ENSG00000096060, ENSG00000198225, ENSG00000088832, ENSG00000077800, ENSG00000004478, ENSG00000119782	FKBP1B, FKBP6, FKBP1C, FKBP1A, FKBP5, FKBP4	fkb-2, fkb-6, fkb-8	fkb-6	FKBP1A	Peptidylprolyl isomerase [Source:UniProtKB/TrEMBL;Acc:Q9U2Q8]
ENSG00000162695, ENSG00000145740, ENSG00000164756, ENSG00000115194, ENSG00000158014, ENSG00000196660, ENSG00000170385, ENSG00000104154	SLC30A8, SLC30A10, SLC30A3, SLC30A2, SLC30A1, SLC30A7, SLC30A4, SLC30A5	ttm-1, cdf-2, cdf-1, Y105E8A.3	Y105E8A.3	SLC30A5	Toxin-regulated Targets of MAPK [Source:UniProtKB/TrEMBL;Acc:O45923]
ENSG00000111640, ENSG00000105679, ENSG00000235868, ENSG00000183663	GAPDH, RP11-44N17.1, GAPDHP31, GAPDHS	gpd-2, gpd-1, gpd-4, gpd-3	gpd-1		Glyceraldehyde-3-phosphate dehydrogenase 2 [Source:UniProtKB/Swiss-Prot;Acc:P17329]
ENSG00000130764	LRRC47	Y54E10A.6	Y54E10A.6
ENSG00000153898, ENSG00000055732, ENSG00000090674	MCOLN2, MCOLN3, MCOLN1	cup-5	cup-5		CUP-5L [Source:UniProtKB/TrEMBL;Acc:Q8T666]
ENSG00000139914, ENSG00000197296	FITM1, FITM2	ZK265.9	ZK265.9
ENSG00000103671	TRIP4	asc-1	asc-1		ASC-1; Activating Signal Cointegrator homolog [Source:UniProtKB/TrEMBL;Acc:G5EDK1]
ENSG00000169188, ENSG00000100823	APEX2, APEX1	exo-3	exo-3		DNA-(apurinic or apyrimidinic site) lyase [Source:UniProtKB/TrEMBL;Acc:G5EBR7]
ENSG00000026036, ENSG00000258366, ENSG00000136492	RTEL1, RTEL1-TNFRSF6B, BRIP1	rtel-1, dog-1	dog-1		Regulator of telomere elongation helicase 1 homolog [Source:UniProtKB/Swiss-Prot;Acc:Q93575]
ENSG00000131381	RBSN	rabs-5	rabs-5		RABenoSyn (Trafficking protein) homolog [Source:UniProtKB/TrEMBL;Acc:W6SBE5]
ENSG00000185036, ENSG00000198961, ENSG00000121848, ENSG00000070423, ENSG00000168894, ENSG00000181191	PJA2, RNF126, PJA1, RNF181	Y54E10BR.3	Y54E10BR.3	PJA2
ENSG00000158290, ENSG00000139842	CUL4B, CUL4A	cul-4	cul-4		Cullin-4 [Source:UniProtKB/Swiss-Prot;Acc:Q17392]
ENSG00000141030	COPS3	csn-3	csn-3		COP9 signalosome complex subunit 3 [Source:UniProtKB/Swiss-Prot;Acc:Q9N425]
ENSG00000066044, ENSG00000122378, ENSG00000157870, ENSG00000196361, ENSG00000162374, ENSG00000107105	FAM213B, FAM213A, ELAVL2, ELAVL4, ELAVL1, ELAVL3	R53.5, exc-7	R53.5	ELAVL2
ENSG00000166816	LDHD	rrf-1, ego-1, rrf-3, rrf-2, F32D8.12	ego-1, rrf-3, rrf-1		RNA-dependent RNA polymerase Family; RRF-1 [Source:UniProtKB/TrEMBL;Acc:G5ECM1]
ENSG00000131269, ENSG00000115657	ABCB7, ABCB6	abtm-1, hmt-1	hmt-1		ABC Transporter, Mitochondrial [Source:UniProtKB/TrEMBL;Acc:A0A061ACG9]
ENSG00000111276	CDKN1B	cki-2	cki-2	CDKN1B	CKI family (Cyclin-dependent Kinase Inhibitor); Cyclin-dependent kinase inhibitor [Source:UniProtKB/TrEMBL;Acc:G5EEJ2]
ENSG00000103423	DNAJA3	dnj-10	dnj-10		DnaJ homolog dnj-10 [Source:UniProtKB/Swiss-Prot;Acc:Q8TA83]
ENSG00000115970	THADA	Y92H12A.5	Y92H12A.5
ENSG00000175305, ENSG00000105173	CCNE2, CCNE1	cye-1	cye-1		G1/S-specific cyclin-E [Source:UniProtKB/Swiss-Prot;Acc:O01501]
ENSG00000188603	CLN3	cln-3.1, cln-3.2, cln-3.3	cln-3.2		Battenin [Source:UniProtKB/TrEMBL;Acc:G5EBM4]
ENSG00000122121, ENSG00000108039	XPNPEP2, XPNPEP1	Y45G5AM.2, app-1	Y45G5AM.2
ENSG00000131504, ENSG00000147202, ENSG00000139734	DIAPH1, DIAPH3, DIAPH2	cyk-1	cyk-1		CYtoKinesis defect [Source:UniProtKB/TrEMBL;Acc:H2KYI3]
ENSG00000099942, ENSG00000167193	CRK, CRKL	ced-2	ced-2		Cell death abnormality protein 2 [Source:UniProtKB/Swiss-Prot;Acc:Q9NHC3]
ENSG00000151503	NCAPD3	hcp-6	hcp-6		HoloCentric chromosome binding Protein [Source:UniProtKB/TrEMBL;Acc:Q95Y84]
ENSG00000171720, ENSG00000196591, ENSG00000116478	HDAC2, HDAC1, HDAC3	hda-3, hda-1	hda-3		Histone deacetylase [Source:UniProtKB/TrEMBL;Acc:G5ECH0]
ENSG00000141552, ENSG00000215639	ANAPC11	apc-11	apc-11		Anaphase-promoting complex subunit 11 [Source:UniProtKB/Swiss-Prot;Acc:Q20052]
ENSG00000164162	ANAPC10	apc-10, Y48G1C.12	Y48G1C.12		Anaphase-promoting complex subunit 10 [Source:UniProtKB/Swiss-Prot;Acc:H2L2B8]
ENSG00000175115, ENSG00000179364	PACS1, PACS2	tag-232	tag-232
ENSG00000147082, ENSG00000134057, ENSG00000157456, ENSG00000133101, ENSG00000145386	CCNA2, CCNB1, CCNB3, CCNA1, CCNB2	cyb-2.1, cyb-3, ZK507.6, cyb-2.2, cyb-1	cyb-2.2, cyb-2.1, cyb-1		CYclin B [Source:UniProtKB/TrEMBL;Acc:O45926]
ENSG00000126698	DNAJC8	dnj-30	dnj-30		DNaJ domain (Prokaryotic heat shock protein) [Source:UniProtKB/TrEMBL;Acc:A0A078BS22]
ENSG00000055917, ENSG00000134644	PUM2, PUM1	fbf-2, puf-5, puf-8, fbf-1, puf-9, puf-4, puf-7, puf-3, puf-6, puf-11	fbf-2, puf-5, puf-8, fbf-1, puf-7, puf-6, puf-11	PUM2, PUM1	Fem-3 mRNA-binding factor 2 [Source:UniProtKB/Swiss-Prot;Acc:Q09312]
ENSG00000115053, ENSG00000160014, ENSG00000143933, ENSG00000231409, ENSG00000241343, ENSG00000178363, ENSG00000214759, ENSG00000165502, ENSG00000198668	RPL36A, CALM1, NCL, CALML3, CALM3, CTD-2509G16.1, RPL36AL, RP11-83J16.1, CALM2	cmd-1, rpl-41, K07H8.10	K07H8.10	CALM3, CALM1, CALM2	Calmodulin [Source:UniProtKB/Swiss-Prot;Acc:O16305]
ENSG00000173221, ENSG00000118990, ENSG00000023572	GLRXP3, GLRX, GLRX2	glrx-10, glrx-22, glrx-21	glrx-22		GLutaRedoXin [Source:UniProtKB/TrEMBL;Acc:Q9N456]
ENSG00000168002	POLR2G	rpb-7	rpb-7		RNA Polymerase II (B) subunit [Source:UniProtKB/TrEMBL;Acc:Q9N3C9]
ENSG00000167513	CDT1	cdt-1	cdt-1		CDT (S. pombe CDC10 Dependent Transcript) homolog [Source:UniProtKB/TrEMBL;Acc:Q86S68]
ENSG00000005194	CIAPIN1	T20B12.7	T20B12.7		Anamorsin homolog [Source:UniProtKB/Swiss-Prot;Acc:P41847]
ENSG00000079246	XRCC5	cku-80	cku-80		ATP-dependent DNA helicase II subunit 2 [Source:UniProtKB/TrEMBL;Acc:Q21829]
ENSG00000106367, ENSG00000182287, ENSG00000152056	AP1S3, AP1S2, AP1S1	aps-1	aps-1	AP1S1	AdaPtin, Small chain (Clathrin associated complex) [Source:UniProtKB/TrEMBL;Acc:O16369]
ENSG00000077147	TM9SF3	Y41D4A.4	Y41D4A.4	TM9SF3	Transmembrane 9 superfamily member [Source:UniProtKB/TrEMBL;Acc:Q95Y24]
ENSG00000213983, ENSG00000166747	AP1G2, AP1G1	apg-1	apg-1		AdaPtin, Gamma chain (Clathrin associated complex) [Source:UniProtKB/TrEMBL;Acc:Q8WQB3]
ENSG00000042753	AP2S1	aps-2	aps-2		AdaPtin, Small chain (Clathrin associated complex) [Source:UniProtKB/TrEMBL;Acc:Q19123]
ENSG00000263138, ENSG00000187800, ENSG00000157890, ENSG00000145794, ENSG00000162591	MEGF11, MEGF6, PEAR1, MEGF10	ced-1, Y64G10A.7	ced-1		Cell death abnormality protein 1 [Source:UniProtKB/Swiss-Prot;Acc:Q9XWD6]
ENSG00000127580	WDR24	Y32H12A.8	Y32H12A.8
ENSG00000183434, ENSG00000114126, ENSG00000198176	TFDP1, TFDP3, TFDP2	dpl-1	dpl-1		Transcription factor dpl-1 [Source:UniProtKB/Swiss-Prot;Acc:Q22703]
ENSG00000074706, ENSG00000142675, ENSG00000149970, ENSG00000153721	IPCEF1, CNKSR3, CNKSR1, CNKSR2	cnk-1	cnk-1		Connector enhancer of kinase suppressor of ras [Source:UniProtKB/Swiss-Prot;Acc:G5EEW9]
ENSG00000006125, ENSG00000100280	AP2B1, AP1B1	apb-1	apb-1		AP complex subunit beta [Source:UniProtKB/TrEMBL;Acc:Q9N4F3]
ENSG00000161202, ENSG00000107404, ENSG00000004975	DVL1, DVL2, DVL3	dsh-2, mig-5, dsh-1	dsh-2		DiSHevelled related [Source:UniProtKB/TrEMBL;Acc:Q18239]
ENSG00000169679	BUB1	bub-1	bub-1		Mitotic checkpoint serine/threonine-protein kinase bub-1 [Source:UniProtKB/Swiss-Prot;Acc:Q21776]
ENSG00000196683	TOMM7	tomm-7	tomm-7		Mitochondrial import receptor subunit TOM7 homolog [Source:UniProtKB/Swiss-Prot;Acc:P34660]
ENSG00000227324, ENSG00000089289	IGBP1	ppfr-4	ppfr-4		Protein Phosphatase Four Regulatory subunit [Source:UniProtKB/TrEMBL;Acc:Q9N4E9]
ENSG00000112578	BYSL	byn-1	byn-1		Cell adhesion protein byn-1 [Source:UniProtKB/Swiss-Prot;Acc:Q20932]
ENSG00000164902	PHAX	Y71H2B.2	Y71H2B.2
ENSG00000165304	MELK	pig-1	pig-1		Maternal embryonic leucine zipper kinase [Source:UniProtKB/Swiss-Prot;Acc:U4PR86]
ENSG00000108773, ENSG00000114166	KAT2A, KAT2B	pcaf-1	pcaf-1		P300/CBP Associated Factor homolog [Source:UniProtKB/TrEMBL;Acc:Q9N3S7]
ENSG00000108094	CUL2	cul-2	cul-2		Cullin-2 [Source:UniProtKB/Swiss-Prot;Acc:Q17390]
ENSG00000105325	FZR1	fzr-1	fzr-1	FZR1	FiZzy Related family [Source:UniProtKB/TrEMBL;Acc:Q09649]
ENSG00000128245, ENSG00000170027, ENSG00000164924, ENSG00000108953, ENSG00000166913	YWHAE, YWHAB, YWHAG, YWHAH, YWHAZ	ftt-2, par-5	par-5	YWHAB, YWHAZ, YWHAE	14-3-3-like protein 2 [Source:UniProtKB/Swiss-Prot;Acc:Q20655]
ENSG00000213985, ENSG00000138071	AC078899.1, ACTR2	arx-2	arx-2		Actin-related protein 2 [Source:UniProtKB/Swiss-Prot;Acc:P53489]
ENSG00000144224	UBXN4	ubxn-4	ubxn-4		UBX domain-containing protein 4 [Source:UniProtKB/Swiss-Prot;Acc:P34631]
ENSG00000137449, ENSG00000214575, ENSG00000113742, ENSG00000107864	CPEB4, CPEB1, CPEB2, CPEB3	cpb-2, fog-1, cpb-1, cpb-3	fog-1, cpb-1, cpb-3		Cytoplasmic polyadenylation element-binding protein 2 [Source:UniProtKB/Swiss-Prot;Acc:Q18317]
ENSG00000185024	BRF1	brf-1	brf-1		BRF (Transcription factor) homolog [Source:UniProtKB/TrEMBL;Acc:A0A131MCT5]
ENSG00000141452	C18orf8	Y50D4A.4	Y50D4A.4
ENSG00000095564	BTAF1	btf-1	btf-1	BTAF1	BTAF (TBP-associated factor) homolog [Source:UniProtKB/TrEMBL;Acc:G5EF07]
ENSG00000144182	LIPT1	C45G3.3	C45G3.3
ENSG00000057608, ENSG00000203879, ENSG00000268690	GDI2, GDI1	gdi-1	gdi-1	GDI2	Rab GDP dissociation inhibitor [Source:UniProtKB/TrEMBL;Acc:G5EBR1]
ENSG00000126787, ENSG00000170579, ENSG00000080845, ENSG00000198010, ENSG00000116544	DLGAP5, DLGAP2, DLGAP3, DLGAP1, DLGAP4	W03A5.4	W03A5.4	DLGAP1, DLGAP4
ENSG00000138160	KIF11	bmk-1	bmk-1	KIF11	Kinesin-like protein [Source:UniProtKB/TrEMBL;Acc:G5EGL7]
ENSG00000015171, ENSG00000101040	ZMYND8, ZMYND11	bra-2, bra-1	bra-2		BMP Receptor Associated protein family [Source:UniProtKB/TrEMBL;Acc:O01918]
ENSG00000115694, ENSG00000102572, ENSG00000134602	STK25, STK24, STK26	gck-1	gck-1		Germinal center kinase 1 [Source:UniProtKB/Swiss-Prot;Acc:H2L099]
ENSG00000105677	TMEM147	ZK418.5	ZK418.5
ENSG00000089685	BIRC5	bir-1, bir-2	bir-1, bir-2		BIR (Baculovirus inhibitory repeat) family; Inhibitor of apoptosis homolog [Source:UniProtKB/TrEMBL;Acc:G5EFA2]
ENSG00000126581	BECN1	bec-1	bec-1		Beclin homolog [Source:UniProtKB/Swiss-Prot;Acc:Q22592]
ENSG00000198898, ENSG00000177938, ENSG00000116489	CAPZA3, CAPZA2, CAPZA1	cap-1	cap-1	CAPZA2	F-actin-capping protein subunit alpha [Source:UniProtKB/Swiss-Prot;Acc:P34685]
ENSG00000182632, ENSG00000163249, ENSG00000216671, ENSG00000108100	CCNYL2, CCNYL3, CCNY, CCNYL1	cyy-1	cyy-1		Cyclin-Y [Source:UniProtKB/Swiss-Prot;Acc:P34624]
ENSG00000164754, ENSG00000244588	RAD21, RAD21L1	coh-1, scc-1	scc-1	RAD21	COHesin family [Source:UniProtKB/TrEMBL;Acc:A0A131MBD0]
ENSG00000082068	WDR70	gad-1	gad-1		Gastrulation defective protein 1 [Source:UniProtKB/Swiss-Prot;Acc:O16519]
ENSG00000132763	MMACHC	cblc-1	cblc-1		MMACHC-like protein [Source:UniProtKB/Swiss-Prot;Acc:Q7Z144]
ENSG00000161791, ENSG00000157827, ENSG00000184922	FMNL3, FMNL2, FMNL1	frl-1	frl-1	FMNL2	FRL (Formin Related gene in Leukocytes) homolog [Source:UniProtKB/TrEMBL;Acc:Q9BL72]
ENSG00000164287, ENSG00000117399	CDC20, CDC20B	fzy-1	fzy-1		WD repeat-containing protein fzy-1 [Source:UniProtKB/Swiss-Prot;Acc:Q09373]
ENSG00000154767	XPC	xpc-1	xpc-1		XPC (Xeroderma Pigmentosum group C) DNA repair gene homolog [Source:UniProtKB/TrEMBL;Acc:Q9N4C3]
ENSG00000147174	ACRC	ZK328.4	ZK328.4
ENSG00000167281, ENSG00000100320, ENSG00000078328	RBFOX1, RBFOX2, RBFOX3	spn-4, asd-1, fox-1	asd-1	RBFOX2	PIP-1 [Source:UniProtKB/TrEMBL;Acc:G5EF02]
ENSG00000162704, ENSG00000136950	ARPC5, ARPC5L	arx-7, C46H11.3	arx-7		Actin-related protein 2/3 complex subunit 5 [Source:UniProtKB/TrEMBL;Acc:O61861]
ENSG00000105778	AVL9	T26A5.6	T26A5.6	AVL9
ENSG00000163466	ARPC2	arx-4	arx-4		Probable actin-related protein 2/3 complex subunit 2 [Source:UniProtKB/Swiss-Prot;Acc:Q8WTM6]
ENSG00000100522	GNPNAT1	gna-1, gna-2	gna-2		Glucosamine 6-phosphate N-acetyltransferase [Source:UniProtKB/Swiss-Prot;Acc:Q17427]
ENSG00000166266	CUL5	cul-5	cul-5		Cullin-5 [Source:UniProtKB/Swiss-Prot;Acc:Q23639]
ENSG00000144366	GULP1	ced-6	ced-6		Cell death protein 6 [Source:UniProtKB/Swiss-Prot;Acc:O76337]
ENSG00000135624	CCT7	cct-7	cct-7		Chaperonin Containing TCP-1 [Source:UniProtKB/TrEMBL;Acc:Q9TZS5]
ENSG00000167283	ATP5L	asg-1, asg-2	asg-1		Probable ATP synthase subunit g 1, mitochondrial [Source:UniProtKB/Swiss-Prot;Acc:P90921]
ENSG00000073536	NLE1	W07E6.2	W07E6.2
ENSG00000118420	UBE3D	Y71H2AM.3	Y71H2AM.3
ENSG00000162300	ZFPL1	Y45G12B.2	Y45G12B.2		Zinc finger protein-like 1 homolog [Source:UniProtKB/Swiss-Prot;Acc:Q9N4Y9]
ENSG00000186684, ENSG00000019186, ENSG00000111012, ENSG00000135929, ENSG00000140459	CYP27A1, CYP27C1, CYP24A1, CYP11A1, CYP27B1	cyp-44A1, ZK177.4	cyp-44A1, ZK177.4		Probable cytochrome P450 CYP44 [Source:UniProtKB/Swiss-Prot;Acc:Q09660]
ENSG00000138767, ENSG00000113300	CNOT6, CNOT6L	ccr-4	ccr-4	CNOT6L	CCR (Yeast CCR4/NOT complex component) homolog; CCR4 [Source:UniProtKB/TrEMBL;Acc:G5EE09]
ENSG00000163539, ENSG00000074054	CLASP1, CLASP2	cls-1, cls-2, cls-3	cls-2	CLASP2
ENSG00000119844	AFTPH	Y45G5AM.9	Y45G5AM.9	AFTPH
ENSG00000012983, ENSG00000011566, ENSG00000104814, ENSG00000168067	MAP4K3, MAP4K2, MAP4K5, MAP4K1	gck-2	gck-2	MAP4K3	Mitogen-activated protein kinase kinase kinase kinase [Source:UniProtKB/TrEMBL;Acc:Q23290]
ENSG00000081237	PTPRC	clr-1	clr-1		Receptor-type tyrosine-protein phosphatase [Source:UniProtKB/Swiss-Prot;Acc:H2KZM6]
ENSG00000120837, ENSG00000148229	POLE3, NFYB	nfyb-1, T26A5.8	T26A5.8		Nuclear transcription Factor Y, B (Beta) subunit [Source:UniProtKB/TrEMBL;Acc:O17286]
ENSG00000113810	SMC4	dpy-27, smc-4	smc-4		Chromosome condensation protein dpy-27 [Source:UniProtKB/Swiss-Prot;Acc:P48996]
ENSG00000112531	QKI	gld-1, asd-2	gld-1		Female germline-specific tumor suppressor gld-1 [Source:UniProtKB/Swiss-Prot;Acc:Q17339]
ENSG00000115267, ENSG00000187790, ENSG00000107201, ENSG00000260178, ENSG00000108771	FANCM, DHX58, IFIH1, DDX58	drh-3, drh-1	drh-3		Dicer Related Helicase [Source:UniProtKB/TrEMBL;Acc:Q93413]
ENSG00000106993, ENSG00000196585, ENSG00000105401, ENSG00000196347	CDC37L1, CDC37	cdc-37	cdc-37		Probable Hsp90 co-chaperone cdc37 [Source:UniProtKB/Swiss-Prot;Acc:O02108]
ENSG00000171621, ENSG00000111671, ENSG00000175093	SPSB1, SPSB2, SPSB4	spsb-2, spsb-1	spsb-2		SPSB (SPry and Socs Box) family [Source:UniProtKB/TrEMBL;Acc:Q965N7]
ENSG00000083223, ENSG00000164329, ENSG00000134744	PAPD4, ZCCHC11, ZCCHC6	cid-1, gld-2, Y34F4.3, pup-2	gld-2		Caffeine Induced Death (S. pombe Cid) homolog [Source:UniProtKB/TrEMBL;Acc:Q09409]
ENSG00000149311	ATM	atm-1	atm-1		Serine/threonine-protein kinase ATM [Source:UniProtKB/Swiss-Prot;Acc:Q9N3Q4]
ENSG00000152670, ENSG00000215301, ENSG00000067048	DDX3Y, DDX3X, DDX4	glh-4, F58G11.2, glh-2, glh-3, vbh-1, ZC317.1, mut-14, glh-1, Y38A10A.6, laf-1	glh-2, glh-3, vbh-1, mut-14, glh-1		ATP-dependent RNA helicase glh-4 [Source:UniProtKB/Swiss-Prot;Acc:O76743]
ENSG00000175054	ATR	atl-1	atl-1		Serine/threonine-protein kinase ATR [Source:UniProtKB/Swiss-Prot;Acc:Q22258]
ENSG00000005339, ENSG00000100393	CREBBP, EP300	cbp-1, K03H1.10	cbp-1	EP300
ENSG00000132664	POLR3F	W09C3.4	W09C3.4		Probable DNA-directed RNA polymerase III subunit RPC6 [Source:UniProtKB/Swiss-Prot;Acc:P91529]
ENSG00000143155	TIPRL	ZK688.9	ZK688.9		TIP41-like protein [Source:UniProtKB/Swiss-Prot;Acc:P34274]
ENSG00000110619, ENSG00000134905	CARS, CARS2	cars-1	cars-1		Cysteinyl Amino-acyl tRNA Synthetase [Source:UniProtKB/TrEMBL;Acc:O76618]
ENSG00000147955	SIGMAR1	W08F4.3	W08F4.3
ENSG00000162813	BPNT1	tag-231	tag-231
ENSG00000177479	ARIH2	T12E12.1	T12E12.1		Potential E3 ubiquitin-protein ligase ariadne-2 [Source:UniProtKB/Swiss-Prot;Acc:Q22431]
ENSG00000122565, ENSG00000108468, ENSG00000094916	CBX1, CBX3, CBX5	hpl-2, hpl-1	hpl-2	CBX5	Chromo-domain protein; HP1 Like (Heterochromatin protein) [Source:UniProtKB/TrEMBL;Acc:G5EDE2]
ENSG00000087586, ENSG00000178999, ENSG00000105146	AURKA, AURKC, AURKB	air-2	air-2		Aurora/IPL1-related protein kinase 2 [Source:UniProtKB/Swiss-Prot;Acc:O01427]
ENSG00000141748, ENSG00000162980, ENSG00000165997	ARL5B, ARL5C, ARL5A	arl-5	arl-5		ADP-ribosylation factor-like protein 5 [Source:UniProtKB/Swiss-Prot;Acc:P34212]
ENSG00000132612, ENSG00000119541	VPS4B, VPS4A	vps-4	vps-4		Related to yeast Vacuolar Protein Sorting factor [Source:UniProtKB/TrEMBL;Acc:Q9BL83]
ENSG00000149554	CHEK1	Y43D4A.6, chk-1, R02C2.1, kin-34, kin-33, R02C2.6	chk-1
ENSG00000112237	CCNC	cic-1	cic-1		Cyclin-C [Source:UniProtKB/Swiss-Prot;Acc:Q9TYP2]
ENSG00000203668, ENSG00000188419	CHM, CHML	rep-1	rep-1		Rab Escort Protein homolog [Source:UniProtKB/TrEMBL;Acc:H2L0G6]
ENSG00000119878	CRIPT	C36B1.14	C36B1.14
ENSG00000173406, ENSG00000153071	DAB1, DAB2	dab-1	dab-1		DAB (Drosophila disabled) homolog [Source:UniProtKB/TrEMBL;Acc:A5JYR4]
ENSG00000085274, ENSG00000112365, ENSG00000116809	MYNN, ZBTB24, ZBTB17	eor-1	eor-1		EOR-1 [Source:UniProtKB/TrEMBL;Acc:G5EDU4]
ENSG00000168818	STX18	syx-18	syx-18		SYntaXin [Source:UniProtKB/TrEMBL;Acc:O76413]
ENSG00000158552, ENSG00000178381	ZFAND2B, ZFAND2A	aip-1	aip-1		Arsenite Inducible Protein [Source:UniProtKB/TrEMBL;Acc:Q9XUW8]
ENSG00000133083, ENSG00000130413, ENSG00000170390, ENSG00000163482	STK36, DCLK1, DCLK2, STK33	F32D8.1, air-1, zyg-8	zyg-8	DCLK1
ENSG00000110583	NAA40	Y38A10A.7	Y38A10A.7
ENSG00000231167, ENSG00000187772, ENSG00000065978, ENSG00000006047, ENSG00000131914, ENSG00000060138	LIN28A, YBX2, LIN28B, YBX1P2, YBX1, YBX3	cey-3, cey-2, lin-28, cey-1, cey-4	lin-28	YBX1	C. Elegans Y-box [Source:UniProtKB/TrEMBL;Acc:P91398]
ENSG00000160799	CCDC12	Y69A2AR.21	Y69A2AR.21
ENSG00000170430	MGMT	agt-1	agt-1		AlkylGuanine DNA alkylTransferase [Source:UniProtKB/TrEMBL;Acc:Q2HQK2]
ENSG00000118515, ENSG00000175634, ENSG00000105221, ENSG00000108443, ENSG00000104205, ENSG00000117020, ENSG00000101049, ENSG00000142208	AKT2, SGK3, SGK1, AKT3, AKT1, RPS6KB1, SGK2, RPS6KB2	sgk-1, akt-2, akt-1, rsks-1	akt-1	AKT3, SGK1	Serine/threonine-protein kinase sgk-1 [Source:UniProtKB/Swiss-Prot;Acc:Q2PJ68]
ENSG00000254685	FPGT	K03H1.13	K03H1.13
ENSG00000214857, ENSG00000127922	SHFM1P1, SHFM1	dss-1	dss-1		Probable 26S proteasome complex subunit dss-1 [Source:UniProtKB/Swiss-Prot;Acc:Q95Y72]
ENSG00000149136	SSRP1	hmg-3, hmg-4	hmg-4, hmg-3		FACT complex subunit ssrp1-B [Source:UniProtKB/Swiss-Prot;Acc:O01683]
ENSG00000166938, ENSG00000083520	DIS3, DIS3L	dis-3	dis-3		Probable exosome complex exonuclease RRP44 [Source:UniProtKB/Swiss-Prot;Acc:Q17632]
ENSG00000164104, ENSG00000124097, ENSG00000189403, ENSG00000029993	HMGB3, HMGB1P1, HMGB2, HMGB1	hmg-1.2	hmg-1.2	HMGB3	High mobility group protein 1.2 [Source:UniProtKB/Swiss-Prot;Acc:Q09390]
ENSG00000102890, ENSG00000062598, ENSG00000155849	ELMO3, ELMO1, ELMO2	ced-12	ced-12		Cell death abnormality protein 12 [Source:UniProtKB/Swiss-Prot;Acc:Q8STE5]
ENSG00000183765	CHEK2	chk-2, T08D2.7	chk-2, T08D2.7		Serine/threonine-protein kinase chk-2 [Source:UniProtKB/Swiss-Prot;Acc:Q9U1Y5]
ENSG00000102796	DHRS12	dhs-1	dhs-1		DeHydrogenases, Short chain [Source:UniProtKB/TrEMBL;Acc:P91013]
ENSG00000010292	NCAPD2	dpy-28	dpy-28		Condensin complex subunit 1 [Source:UniProtKB/Swiss-Prot;Acc:Q9U2M1]
ENSG00000176248	ANAPC2	apc-2	apc-2		Anaphase-promoting complex subunit 2 [Source:UniProtKB/Swiss-Prot;Acc:P34514]
ENSG00000105258	POLR2I	rpb-9	rpb-9		DNA-directed RNA polymerase subunit [Source:UniProtKB/TrEMBL;Acc:Q965S0]
ENSG00000102893	PHKB	Y67D8A.2	Y67D8A.2
ENSG00000175203	DCTN2	dnc-2	dnc-2		Probable dynactin subunit 2 [Source:UniProtKB/Swiss-Prot;Acc:Q09248]
ENSG00000166507, ENSG00000164100, ENSG00000138653, ENSG00000175818, ENSG00000070614	NDST2, NDST4, NDST1, NDST3	hst-1	hst-1	NDST1	Bifunctional heparan sulfate N-deacetylase/N-sulfotransferase 1 Heparan sulfate N-deacetylase 1 Heparan sulfate N-sulfotransferase 1 [Source:UniProtKB/Swiss-Prot;Acc:Q966W3]
ENSG00000184481, ENSG00000150907, ENSG00000204060, ENSG00000118689	FOXO3, FOXO4, FOXO1, FOXO6	daf-16	daf-16		Forkhead box protein O [Source:UniProtKB/Swiss-Prot;Acc:O16850]
ENSG00000102878, ENSG00000025156, ENSG00000185122	HSF4, HSF2, HSF1	hsf-1	hsf-1		Heat Shock Factor; Heat shock transcription factor 1 [Source:UniProtKB/TrEMBL;Acc:G5EFT5]
ENSG00000214026	MRPL23	mrpl-23	mrpl-23		Probable 39S ribosomal protein L23, mitochondrial [Source:UniProtKB/Swiss-Prot;Acc:Q9GYS9]
ENSG00000141564	RPTOR	daf-15	daf-15		DAF-15 [Source:UniProtKB/TrEMBL;Acc:Q68TI8]
ENSG00000138604	GLCE	hse-5	hse-5		D-glucuronyl C5-epimerase [Source:UniProtKB/Swiss-Prot;Acc:P46555]
ENSG00000110367, ENSG00000269612	DDX6	cgh-1	cgh-1	DDX6	ATP-dependent RNA helicase cgh-1 [Source:UniProtKB/Swiss-Prot;Acc:Q95YF3]
ENSG00000163811	WDR43	T10B5.3	T10B5.3
ENSG00000128641, ENSG00000166866, ENSG00000142347, ENSG00000136286, ENSG00000197879, ENSG00000157483, ENSG00000176658	MYO1C, MYO1F, MYO1E, MYO1D, MYO1A, MYO1G, MYO1B	hum-1, hum-5	hum-1		Heavy chain, Unconventional Myosin [Source:UniProtKB/TrEMBL;Acc:Q19901]
ENSG00000135093	USP30	Y67D2.2	Y67D2.2		Ubiquitin carboxyl-terminal hydrolase [Source:UniProtKB/TrEMBL;Acc:Q9BKQ6]
ENSG00000086758, ENSG00000268980	HUWE1	eel-1	eel-1	HUWE1	Enhancer of EfL-1 mutant phenotype [Source:UniProtKB/TrEMBL;Acc:U4PES6]
ENSG00000099381, ENSG00000139718	SETD1B, SETD1A	set-2	set-2	SETD1B	Histone-lysine N-methyltransferase set-2 [Source:UniProtKB/Swiss-Prot;Acc:Q18221]
ENSG00000198563, ENSG00000229496, ENSG00000215425, ENSG00000235439, ENSG00000225073, ENSG00000225859, ENSG00000230624, ENSG00000237889, ENSG00000123136	DDX39A, DDX39B	hel-1	hel-1		Spliceosome RNA helicase DDX39B homolog [Source:UniProtKB/Swiss-Prot;Acc:Q18212]
ENSG00000112212, ENSG00000100300	TSPO2, TSPO	C41G7.9	C41G7.9
ENSG00000135503, ENSG00000115170, ENSG00000106799, ENSG00000123612	ACVR1C, TGFBR1, ACVR1B, ACVR1	daf-1	daf-1	ACVR1B	Cell surface receptor daf-1 [Source:UniProtKB/Swiss-Prot;Acc:P20792]
ENSG00000213619	NDUFS3	nuo-2	nuo-2	NDUFS3	NADH Ubiquinone Oxidoreductase [Source:UniProtKB/TrEMBL;Acc:Q86NC2]
ENSG00000172613, ENSG00000151164	RAD9B, RAD9A	hpr-9	hpr-9		Homolog of S. Pombe Rad [Source:UniProtKB/TrEMBL;Acc:Q95Q27]
ENSG00000160193	WDR4	Y102E9.2	Y102E9.2
ENSG00000174669, ENSG00000112759, ENSG00000198246	SLC29A2, SLC29A3, SLC29A1	F16H11.3, C47A4.2, F44D12.9, ent-1, ent-3, ent-2	ent-1		Equilibrative Nucleoside Transporter; Equilibrative nucleoside transporter 1 [Source:UniProtKB/TrEMBL;Acc:G5EDJ3]
ENSG00000131013	PPIL4	sig-7	sig-7		Peptidyl-prolyl cis-trans isomerase sig-7 [Source:UniProtKB/Swiss-Prot;Acc:G5EEW6]
ENSG00000144848	ATG3	atg-3	atg-3		AuTophaGy (Yeast Atg homolog) [Source:UniProtKB/TrEMBL;Acc:U4PRD2]
ENSG00000085832, ENSG00000127527	EPS15L1, EPS15	ehs-1	ehs-1	EPS15	EHS-1; Eps15 (Endocytosis protein) Homologous Sequence [Source:UniProtKB/TrEMBL;Acc:Q9BIF4]
ENSG00000138346	DNA2	dna-2	dna-2		Yeast DNA helicase/endonuclease family [Source:UniProtKB/TrEMBL;Acc:Q9U3F2]
ENSG00000159409, ENSG00000140488, ENSG00000149187, ENSG00000101489, ENSG00000048740, ENSG00000161082	CELF3, CELF2, CELF1, CELF4, CELF5, CELF6	etr-1, unc-75	etr-1	CELF2, CELF4, CELF3	ELAV-Type RNA binding-protein family; ELAV-type RNA binding protein variant E [Source:UniProtKB/TrEMBL;Acc:A7KQE9]
ENSG00000173960, ENSG00000088833, ENSG00000215114	UBXN2A, NSFL1C, UBXN2B	ubxn-2	ubxn-2		UBX-containing protein in Nematodes [Source:UniProtKB/TrEMBL;Acc:Q86DD7]
ENSG00000126953, ENSG00000150779	TIMM8B, TIMM8A	ddp-1	ddp-1		Mitochondrial import inner membrane translocase subunit Tim8 [Source:UniProtKB/Swiss-Prot;Acc:Q9N408]
ENSG00000129351, ENSG00000056097, ENSG00000165209, ENSG00000105278	ZFR2, ILF3, ZFR, STRBP	Y95B8A.8	Y95B8A.8	ZFR
ENSG00000110011	DNAJC4	dnj-4	dnj-4		DNaJ domain (Prokaryotic heat shock protein) [Source:UniProtKB/TrEMBL;Acc:P91014]
ENSG00000196544	BORCS6	Y37E11B.3	Y37E11B.3
ENSG00000269384, ENSG00000077935, ENSG00000072501	SMC1B, SMC1A	him-1	him-1		Structural maintenance of chromosomes protein 1 [Source:UniProtKB/Swiss-Prot;Acc:O01789]
ENSG00000142207	URB1	T05H4.10	T05H4.10
ENSG00000143228	NUF2	him-10	him-10		Kinetochore protein Nuf2 homolog [Source:UniProtKB/Swiss-Prot;Acc:Q21952]
ENSG00000170464, ENSG00000148719, ENSG00000164031	DNAJB14, DNAJC18, DNAJB12	dnj-1	dnj-1		DnaJ homolog subfamily B member 1 [Source:UniProtKB/Swiss-Prot;Acc:Q17438]
ENSG00000150760, ENSG00000088538, ENSG00000128512, ENSG00000147459, ENSG00000134516	DOCK3, DOCK5, DOCK4, DOCK2, DOCK1	ced-5	ced-5	DOCK4, DOCK3	CED-5 [Source:UniProtKB/TrEMBL;Acc:G5EEN3]
ENSG00000172432, ENSG00000100226	GTPBP2, GTPBP1	cgp-1, T04H1.2	cgp-1		GTP-binding protein cgp-1 [Source:UniProtKB/Swiss-Prot;Acc:Q18905]
ENSG00000176108	CHMP6	vps-20	vps-20		Related to yeast Vacuolar Protein Sorting factor [Source:UniProtKB/TrEMBL;Acc:Q9BL60]
ENSG00000004700, ENSG00000197299, ENSG00000165392	BLM, WRN, RECQL	him-6, wrn-1, K02F3.12	him-6		Bloom syndrome protein homolog [Source:UniProtKB/Swiss-Prot;Acc:O18017]
ENSG00000143452, ENSG00000176635	HORMAD2, HORMAD1	htp-1, htp-2, him-3	htp-1, htp-2, him-3		Him-Three Paralog [Source:UniProtKB/TrEMBL;Acc:Q20305]
ENSG00000152430, ENSG00000205916, ENSG00000205944, ENSG00000187191, ENSG00000188120, ENSG00000092345	DAZ2, DAZ1, DAZ4, DAZ3, DAZL, BOLL	daz-1	daz-1		DAZ protein 1 [Source:UniProtKB/Swiss-Prot;Acc:Q20870]
ENSG00000111880	RNGTT	cel-1	cel-1		mRNA-capping enzyme Polynucleotide 5'-triphosphatase mRNA guanylyltransferase [Source:UniProtKB/Swiss-Prot;Acc:Q17607]
ENSG00000144635, ENSG00000135720	DYNC1LI1, DYNC1LI2	dli-1	dli-1		Dynein Light Intermediate chain [Source:UniProtKB/TrEMBL;Acc:G5ECK7]
ENSG00000189060, ENSG00000124610, ENSG00000168298, ENSG00000184357, ENSG00000178804, ENSG00000187837, ENSG00000124575, ENSG00000187475, ENSG00000184897	H1FX, HIST1H1A, H1FOO, HIST1H1B, H1F0, HIST1H1C, HIST1H1D, HIST1H1T, HIST1H1E	hil-5, hil-1, hil-6, hil-2, hil-4, hil-3, his-24	hil-5, hil-2, hil-4	H1F0	Histone H1.5 [Source:UniProtKB/Swiss-Prot;Acc:O01833]
ENSG00000148606, ENSG00000181222	POLR3A, POLR2A	rpc-1, ama-1	ama-1		DNA-directed RNA polymerase subunit [Source:UniProtKB/TrEMBL;Acc:Q18566]
ENSG00000161800	RACGAP1	cyk-4	cyk-4		CYtoKinesis defect [Source:UniProtKB/TrEMBL;Acc:Q9XUS9]
ENSG00000152465, ENSG00000136448	NMT1, NMT2	nmt-1	nmt-1		Probable glycylpeptide N-tetradecanoyltransferase [Source:UniProtKB/Swiss-Prot;Acc:P46548]
ENSG00000175766, ENSG00000151247	EIF4E1B, EIF4E	ife-3, ife-1, ife-5, ife-2	ife-1, ife-3		Eukaryotic translation initiation factor 4E-3 [Source:UniProtKB/Swiss-Prot;Acc:O61955]
ENSG00000079785	DDX1	Y55F3BR.1	Y55F3BR.1
ENSG00000147813	NAPRT	Y54G2A.17	Y54G2A.17
ENSG00000149503	INCENP	icp-1	icp-1		InCenP homolog; Incenp-like protein ICP-1 [Source:UniProtKB/TrEMBL;Acc:G5EE37]
ENSG00000171960	PPIH	cyn-11	cyn-11		Peptidyl-prolyl cis-trans isomerase 11 [Source:UniProtKB/Swiss-Prot;Acc:P52018]

## Sheet: Top 500 FBF OO 25° vs Hafner
Human ENSG	Human gene symbol	Worm public name	FBF targets (Worm public name)	PUM targets (Human gene symbol)	Gene description
ENSG00000174332, ENSG00000107249	GLIS3, GLIS1	tra-1	tra-1		Sex-determining transformer protein 1 [Source:UniProtKB/Swiss-Prot;Acc:P34708]
ENSG00000004866, ENSG00000007341	ST7, ST7L	F11A10.5	F11A10.5	ST7L	Protein ST7 homolog [Source:UniProtKB/Swiss-Prot;Acc:Q19337]
ENSG00000187609	EXD3	ZK1098.3, Y57A10A.13, mut-7	mut-7
ENSG00000137513, ENSG00000134440	NARS2, NARS	nars-2, nars-1	nars-1	NARS	Asparaginyl(N) Amino-acyl tRNA Synthetase [Source:UniProtKB/TrEMBL;Acc:Q95PZ8]
ENSG00000153487, ENSG00000168395, ENSG00000168556, ENSG00000071243, ENSG00000111653	ING4, ING1, ING2, ING5, ING3	lsy-13, ing-3	ing-3	ING5, ING3
ENSG00000135945	REV1	rev-1	rev-1	REV1	DNA repair protein REV1 [Source:UniProtKB/TrEMBL;Acc:Q09615]
ENSG00000010292	NCAPD2	dpy-28	dpy-28	NCAPD2	Condensin complex subunit 1 [Source:UniProtKB/Swiss-Prot;Acc:Q9U2M1]
ENSG00000113810	SMC4	dpy-27, smc-4	smc-4		Chromosome condensation protein dpy-27 [Source:UniProtKB/Swiss-Prot;Acc:P48996]
ENSG00000138760, ENSG00000135218, ENSG00000073060	SCARB1, SCARB2, CD36	scav-2, scav-4, scav-3, scav-6, scav-5, scav-1	scav-2		SCAVenger receptor (CD36 family) related [Source:UniProtKB/TrEMBL;Acc:G5EBM7]
ENSG00000101888, ENSG00000132661	NXT1, NXT2	nxt-1	nxt-1		NTF2-related export protein [Source:UniProtKB/Swiss-Prot;Acc:Q9U757]
ENSG00000108264, ENSG00000173011	TADA2B	ada-2	ada-2		ADA (Histone acetyltransferase complex) subunit [Source:UniProtKB/TrEMBL;Acc:Q5DX44]
ENSG00000135473	PAN2	panl-2	panl-2		PAN (PolyA-specific riboNucLease) subunit [Source:RefSeq peptide;Acc:NP_498519]
ENSG00000167548, ENSG00000055609	KMT2C, KMT2D	set-16	set-16		Histone-lysine N-methyltransferase [Source:UniProtKB/TrEMBL;Acc:G5EGI1]
ENSG00000062822	POLD1	F10C2.4	F10C2.4		DNA polymerase delta catalytic subunit [Source:UniProtKB/Swiss-Prot;Acc:P90829]
ENSG00000220023, ENSG00000225566, ENSG00000109536, ENSG00000149531	FRG1BP, FRG1	frg-1	frg-1		Protein FRG1 homolog [Source:UniProtKB/Swiss-Prot;Acc:O18282]
ENSG00000180628, ENSG00000056661, ENSG00000185619, ENSG00000168283, ENSG00000156374, ENSG00000115289	BMI1, PCGF6, PCGF1, PCGF5, PCGF3	mig-32	mig-32	BMI1, PCGF6, PCGF5, PCGF3
ENSG00000154611, ENSG00000101182	PSMA8, PSMA7	pas-4	pas-4		Proteasome subunit alpha type-7 [Source:UniProtKB/Swiss-Prot;Acc:Q95005]
ENSG00000075239, ENSG00000167315, ENSG00000111666, ENSG00000138018, ENSG00000120437, ENSG00000134255	CEPT1, ACAT1, ACAT2, ACAA2, EPT1, CHPT1	F53A2.7, T02G5.4, F54D7.2, cept-1, kat-1, Y49A3A.1, T02G5.7	T02G5.7
ENSG00000143106	PSMA5	pas-5	pas-5		Proteasome subunit alpha type-5 [Source:UniProtKB/Swiss-Prot;Acc:Q95008]
ENSG00000132470, ENSG00000115221, ENSG00000160255, ENSG00000259207, ENSG00000082781, ENSG00000139626, ENSG00000150093	ITGB7, ITGB6, ITGB3, ITGB5, ITGB4, ITGB1, ITGB2	pat-3	pat-3	ITGB1	Integrin beta pat-3 [Source:UniProtKB/Swiss-Prot;Acc:Q27874]
ENSG00000173114, ENSG00000170382, ENSG00000175928	LRRN3, LRRN2, LRRN1	tol-1	tol-1		TOLl (Drosophila) family [Source:UniProtKB/TrEMBL;Acc:Q9N5Z3]
ENSG00000145041	VPRBP	dcaf-1	dcaf-1	VPRBP	DDB1- and CUL4-associated factor homolog 1 [Source:UniProtKB/Swiss-Prot;Acc:Q21106]
ENSG00000108294		pbs-3	pbs-3		Proteasome subunit beta type-3 [Source:UniProtKB/Swiss-Prot;Acc:Q23237]
ENSG00000165775, ENSG00000182814, ENSG00000069509	FUNDC2, FUNDC1, FUNDC2P2	T06D8.7	T06D8.7	FUNDC1
ENSG00000185246	PRPF39	F25B4.5	F25B4.5	PRPF39
ENSG00000137992	DBT	ZK669.4	ZK669.4
ENSG00000132182, ENSG00000198284, ENSG00000143552	NUP210P1, NUP210, NUP210L	npp-12	npp-12		Nuclear Pore complex Protein [Source:UniProtKB/TrEMBL;Acc:P91495]
ENSG00000058729	RIOK2	riok-2	riok-2	RIOK2	Serine/threonine-protein kinase RIO2 [Source:UniProtKB/Swiss-Prot;Acc:Q95Q34]
ENSG00000187627, ENSG00000183054, ENSG00000015568, ENSG00000185304, ENSG00000169629, ENSG00000099901, ENSG00000153165, ENSG00000153201, ENSG00000196862	RGPD2, RGPD4, RGPD6, RANBP2, RANBP1, RGPD5, RGPD3, RGPD1, RGPD8	npp-9	npp-9	RANBP2	Nuclear Pore complex Protein [Source:UniProtKB/TrEMBL;Acc:Q21021]
ENSG00000205544	TMEM256	Y106G6H.8	Y106G6H.8
ENSG00000122966	CIT	W02B8.2, F59A6.5	F59A6.5
ENSG00000174669, ENSG00000112759, ENSG00000198246	SLC29A2, SLC29A3, SLC29A1	F16H11.3, C47A4.2, F44D12.9, ent-1, ent-3, ent-2	ent-1		Equilibrative Nucleoside Transporter; Equilibrative nucleoside transporter 1 [Source:UniProtKB/TrEMBL;Acc:G5EDJ3]
ENSG00000154997, ENSG00000138758, ENSG00000125354, ENSG00000164402, ENSG00000186522	SEPT6, SEPT11, SEPT8, SEPT10, SEPT14	unc-61	unc-61
ENSG00000110171, ENSG00000109654	TRIM2, TRIM3	ncl-1, nhl-1	ncl-1	TRIM2	B-box type zinc finger protein ncl-1 [Source:UniProtKB/Swiss-Prot;Acc:P34611]
ENSG00000070540, ENSG00000157954	WIPI1, WIPI2	atg-18	atg-18	WIPI2	AuTophaGy (Yeast Atg homolog) [Source:UniProtKB/TrEMBL;Acc:H2KYN5]
ENSG00000179295, ENSG00000111679, ENSG00000217801	PTPN11, PTPN6, RP11-465B22.3	ptp-2	ptp-2	PTPN6	Tyrosine-protein phosphatase non-receptor type ptp-2 [Source:UniProtKB/Swiss-Prot;Acc:G5EC24]
ENSG00000140905	GCSH	gcsh-1, F52A8.5	F52A8.5	GCSH	Glycine cleavage system H protein [Source:UniProtKB/TrEMBL;Acc:O62122]
ENSG00000105287, ENSG00000184304, ENSG00000115825	PRKD2, PRKD1, PRKD3	dkf-1, dkf-2	dkf-2	PRKD3	Serine/threonine-protein kinase dkf-1 [Source:UniProtKB/Swiss-Prot;Acc:Q9XUJ7]
ENSG00000235418, ENSG00000196781, ENSG00000104964, ENSG00000106829, ENSG00000104953, ENSG00000065717, ENSG00000140332	TLE4, AES, TLE3, TLE6, TLE1, TLE2	unc-37	unc-37	TLE1	Transcription factor unc-37 [Source:UniProtKB/Swiss-Prot;Acc:O02482]
ENSG00000165304	MELK	pig-1	pig-1	MELK	Maternal embryonic leucine zipper kinase [Source:UniProtKB/Swiss-Prot;Acc:U4PR86]
ENSG00000147955	SIGMAR1	W08F4.3	W08F4.3
ENSG00000065609, ENSG00000073921	PICALM, SNAP91	unc-11	unc-11		Phosphatidylinositol-binding clathrin assembly protein unc-11 [Source:UniProtKB/Swiss-Prot;Acc:Q9XZI6]
ENSG00000170638	TRABD	F38A5.2	F38A5.2
ENSG00000124370	MCEE	mce-1	mce-1	MCEE	Methylmalonyl-CoA Epimerase; Mitochondrial methylmalonyl-CoA epimerase [Source:UniProtKB/TrEMBL;Acc:G5EEG4]
ENSG00000138468, ENSG00000112701	SENP7, SENP6	ulp-4, ulp-2	ulp-2	SENP6	Ubiquitin-like protease 4 [Source:UniProtKB/Swiss-Prot;Acc:Q09275]
ENSG00000198855	FICD	fic-1	fic-1		Adenosine monophosphate-protein transferase FICD homolog [Source:UniProtKB/Swiss-Prot;Acc:Q23544]
ENSG00000244687, ENSG00000240849, ENSG00000124208, ENSG00000169139	TMEM189, UBE2V1, TMEM189-UBE2V1, UBE2V2	Y53C10A.5, uev-1	uev-1	UBE2V2
ENSG00000152520	PAN3	panl-3	panl-3		PAB-dependent poly(A)-specific ribonuclease subunit PAN3 [Source:UniProtKB/Swiss-Prot;Acc:P34653]
ENSG00000030066	NUP160	npp-6	npp-6	NUP160	Nuclear Pore complex Protein [Source:UniProtKB/TrEMBL;Acc:Q8T8M4]
ENSG00000132646	PCNA	pcn-1	pcn-1	PCNA	Proliferating cell nuclear antigen [Source:UniProtKB/Swiss-Prot;Acc:O02115]
ENSG00000152430, ENSG00000205916, ENSG00000205944, ENSG00000187191, ENSG00000188120, ENSG00000092345	DAZ2, DAZ1, DAZ4, DAZ3, DAZL, BOLL	daz-1	daz-1		DAZ protein 1 [Source:UniProtKB/Swiss-Prot;Acc:Q20870]
ENSG00000160695	VPS11	vps-11	vps-11		Vacuolar protein sorting-associated protein 11 homolog [Source:UniProtKB/Swiss-Prot;Acc:Q09600]
ENSG00000198554	WDHD1	F17C11.10	F17C11.10	WDHD1
ENSG00000168175	MAPK1IP1L	C02B10.5	C02B10.5
ENSG00000204518, ENSG00000197953, ENSG00000114771, ENSG00000188984, ENSG00000144959	AADACL2, NCEH1, AADACL4, AADAC, AADACL3	Y43F8A.3, trcs-1, F16F9.4, T09B9.1	trcs-1		TRansport of membrane to Cell Surface [Source:UniProtKB/TrEMBL;Acc:Q19839]
ENSG00000186642	PDE2A	pde-2	pde-2		Probable 3',5'-cyclic phosphodiesterase pde-2 [Source:UniProtKB/Swiss-Prot;Acc:P30645]
ENSG00000155876, ENSG00000083750	RRAGA, RRAGB	raga-1	raga-1		RAs-related GTP-binding protein A [Source:UniProtKB/TrEMBL;Acc:Q22743]
ENSG00000074706, ENSG00000142675, ENSG00000149970, ENSG00000153721	IPCEF1, CNKSR3, CNKSR1, CNKSR2	cnk-1	cnk-1		Connector enhancer of kinase suppressor of ras [Source:UniProtKB/Swiss-Prot;Acc:G5EEW9]
ENSG00000173473, ENSG00000139613	SMARCC1, SMARCC2	swsn-1	swsn-1		SWI/SNF nucleosome remodeling complex component; SWI3-like protein [Source:UniProtKB/TrEMBL;Acc:G5EF87]
ENSG00000115053, ENSG00000160014, ENSG00000143933, ENSG00000231409, ENSG00000241343, ENSG00000178363, ENSG00000214759, ENSG00000165502, ENSG00000198668	RPL36A, CALM1, NCL, CALML3, CALM3, CTD-2509G16.1, RPL36AL, RP11-83J16.1, CALM2	cmd-1, rpl-41, K07H8.10	K07H8.10	CALM1, NCL	Calmodulin [Source:UniProtKB/Swiss-Prot;Acc:O16305]
ENSG00000164327	RICTOR	rict-1	rict-1
ENSG00000157593	SLC35B2	pst-1	pst-1		Adenosine 3'-phospho 5'-phosphosulfate transporter 1 [Source:UniProtKB/Swiss-Prot;Acc:Q8MXJ9]
ENSG00000163539, ENSG00000074054	CLASP1, CLASP2	cls-1, cls-2, cls-3	cls-2	CLASP1
ENSG00000205726, ENSG00000198399	ITSN2, ITSN1	itsn-1	itsn-1	ITSN2	ITSN (Intersectin) family [Source:UniProtKB/TrEMBL;Acc:E6N0W0]
ENSG00000123992	DNPEP	dnpp-1	dnpp-1	DNPEP	Aspartyl aminopeptidase [Source:UniProtKB/Swiss-Prot;Acc:Q19087]
ENSG00000177192	PUS1	pus-1	pus-1		tRNA pseudouridine synthase [Source:UniProtKB/TrEMBL;Acc:Q9XXN0]
ENSG00000166816	LDHD	rrf-1, ego-1, rrf-3, rrf-2, F32D8.12	rrf-3, rrf-1		RNA-dependent RNA polymerase Family; RRF-1 [Source:UniProtKB/TrEMBL;Acc:G5ECM1]
ENSG00000018189, ENSG00000177548, ENSG00000176783, ENSG00000204130, ENSG00000029725	RUFY3, RUFY1, RUFY2, RABEP2, RABEP1	rabn-5	rabn-5		RABaptiN (Rab effector) [Source:UniProtKB/TrEMBL;Acc:Q19088]
ENSG00000039650	PNKP	F21D5.5	F21D5.5
ENSG00000166337	TAF10	taf-10	taf-10		Transcription initiation factor TFIID subunit 10 [Source:UniProtKB/TrEMBL;Acc:Q95ZS0]
ENSG00000102882, ENSG00000100030, ENSG00000166484	MAPK7, MAPK1, MAPK3	F09C12.2, mpk-1, mpk-2	mpk-1	MAPK1	Mitogen-activated protein kinase [Source:UniProtKB/TrEMBL;Acc:Q19243]
ENSG00000079246	XRCC5	cku-80	cku-80	XRCC5	ATP-dependent DNA helicase II subunit 2 [Source:UniProtKB/TrEMBL;Acc:Q21829]
ENSG00000111276	CDKN1B	cki-2	cki-2	CDKN1B	CKI family (Cyclin-dependent Kinase Inhibitor); Cyclin-dependent kinase inhibitor [Source:UniProtKB/TrEMBL;Acc:G5EEJ2]
ENSG00000177646, ENSG00000072778	ACADVL, ACAD9	acdh-12	acdh-12		Acyl CoA DeHydrogenase [Source:UniProtKB/TrEMBL;Acc:Q6AHQ5]
ENSG00000137449, ENSG00000214575, ENSG00000113742, ENSG00000107864	CPEB4, CPEB1, CPEB2, CPEB3	cpb-2, fog-1, cpb-1, cpb-3	cpb-1, cpb-3	CPEB2, CPEB4	Cytoplasmic polyadenylation element-binding protein 2 [Source:UniProtKB/Swiss-Prot;Acc:Q18317]
ENSG00000166579, ENSG00000072864	NDEL1, NDE1	nud-2	nud-2		Aspergillus NUclear Division related [Source:UniProtKB/TrEMBL;Acc:O45717]
ENSG00000118454	ANKRD13C	C01F1.6	C01F1.6
ENSG00000184481, ENSG00000150907, ENSG00000204060, ENSG00000118689	FOXO3, FOXO4, FOXO1, FOXO6	daf-16	daf-16	FOXO3, FOXO1	Forkhead box protein O [Source:UniProtKB/Swiss-Prot;Acc:O16850]
ENSG00000083123	BCKDHB	tag-173	tag-173	BCKDHB
ENSG00000140451	PIF1	pif-1	pif-1		ATP-dependent DNA helicase PIF1 [Source:UniProtKB/TrEMBL;Acc:G5EFV7]
ENSG00000168002	POLR2G	rpb-7	rpb-7		RNA Polymerase II (B) subunit [Source:UniProtKB/TrEMBL;Acc:Q9N3C9]
ENSG00000132383	RPA1	rpa-1	rpa-1		Probable replication factor A 73 kDa subunit [Source:UniProtKB/Swiss-Prot;Acc:Q19537]
ENSG00000173406, ENSG00000153071	DAB1, DAB2	dab-1	dab-1	DAB1	DAB (Drosophila disabled) homolog [Source:UniProtKB/TrEMBL;Acc:A5JYR4]
ENSG00000161800	RACGAP1	cyk-4	cyk-4		CYtoKinesis defect [Source:UniProtKB/TrEMBL;Acc:Q9XUS9]
ENSG00000144233, ENSG00000101935	AMMECR1L, AMMECR1	R166.3	R166.3	AMMECR1L
ENSG00000197181, ENSG00000134627, ENSG00000125207, ENSG00000184571	PIWIL2, PIWIL3, PIWIL4, PIWIL1	prg-1, prg-2	prg-1		Piwi-like protein [Source:UniProtKB/TrEMBL;Acc:P90786]
ENSG00000164190	NIPBL	pqn-85	pqn-85		Nipped-B-like protein pqn-85 [Source:UniProtKB/Swiss-Prot;Acc:Q95XZ5]
ENSG00000243244, ENSG00000242441, ENSG00000165417, ENSG00000068781, ENSG00000140022	STON1-GTF2A1L, GTF2A1, STON1, GTF2A1L, STON2	unc-41, pqn-51	pqn-51	STON1, GTF2A1L, GTF2A1	Putative stoned B-like protein [Source:UniProtKB/Swiss-Prot;Acc:P90761]
ENSG00000184708	EIF4ENIF1	ifet-1	ifet-1	EIF4ENIF1	Translational repressor ifet-1 [Source:UniProtKB/Swiss-Prot;Acc:Q20898]
ENSG00000178719, ENSG00000135472, ENSG00000155957, ENSG00000135926	TMBIM4, FAIM2, GRINA, TMBIM1	tag-120, xbx-6, tmbi-4, Y42H9AR.2	xbx-6	TMBIM4
ENSG00000213341, ENSG00000143466, ENSG00000183735, ENSG00000104365	TBK1, IKBKB, CHUK	Y39G8B.5, ikke-1	ikke-1	TBK1, CHUK
ENSG00000196981, ENSG00000196363	WDR5B, WDR5	wdr-5.3, wdr-5.2, wdr-5.1	wdr-5.3		WD repeat-containing protein wdr-5.3 [Source:UniProtKB/Swiss-Prot;Acc:Q23256]
ENSG00000108094	CUL2	cul-2	cul-2	CUL2	Cullin-2 [Source:UniProtKB/Swiss-Prot;Acc:Q17390]
ENSG00000198056	PRIM1	T24C4.5, pri-1	pri-1		DNA primase [Source:UniProtKB/TrEMBL;Acc:Q9TZ34]
ENSG00000147082, ENSG00000134057, ENSG00000157456, ENSG00000133101, ENSG00000145386	CCNA2, CCNB1, CCNB3, CCNA1, CCNB2	cyb-2.1, cyb-3, ZK507.6, cyb-2.2, cyb-1	cyb-2.2, cyb-2.1, cyb-1	CCNA2	CYclin B [Source:UniProtKB/TrEMBL;Acc:O45926]
ENSG00000175305, ENSG00000105173	CCNE2, CCNE1	cye-1	cye-1	CCNE2	G1/S-specific cyclin-E [Source:UniProtKB/Swiss-Prot;Acc:O01501]
ENSG00000165794, ENSG00000141873, ENSG00000143570	SLC39A1, SLC39A3, SLC39A2	F30B5.7, C06G8.3, F55F8.9, F31C3.4, Y54G9A.4	F31C3.4, F55F8.9
ENSG00000102144, ENSG00000170950, ENSG00000269666	PGK1, PGK2	pgk-1	pgk-1		Probable phosphoglycerate kinase [Source:UniProtKB/Swiss-Prot;Acc:P91427]
ENSG00000166851, ENSG00000145632, ENSG00000237810, ENSG00000173846	CTD-2571E19.3, PLK2, PLK3, PLK1	plk-1, plk-3, plk-2	plk-3		Serine/threonine-protein kinase plk-1 [Source:UniProtKB/Swiss-Prot;Acc:P34331]
ENSG00000206557	TRIM71	lin-41	lin-41
ENSG00000101460, ENSG00000171471, ENSG00000140941	MAP1LC3A, MAP1LC3B	lgg-2	lgg-2	MAP1LC3B
ENSG00000183765	CHEK2	chk-2, T08D2.7	chk-2		Serine/threonine-protein kinase chk-2 [Source:UniProtKB/Swiss-Prot;Acc:Q9U1Y5]
ENSG00000103502	CDIPT	pisy-1	pisy-1		CDP-diacylglycerol--inositol 3-phosphatidyltransferase [Source:UniProtKB/TrEMBL;Acc:Q9U2G1]
ENSG00000138604	GLCE	hse-5	hse-5	GLCE	D-glucuronyl C5-epimerase [Source:UniProtKB/Swiss-Prot;Acc:P46555]
ENSG00000080007, ENSG00000184735	DDX53, DDX43	Y54G11A.3	Y54G11A.3
ENSG00000105983, ENSG00000139636	LMBR1, LMBR1L	R05D3.2	R05D3.2	LMBR1	LIMR family protein R05D3.2 [Source:UniProtKB/Swiss-Prot;Acc:P34535]
ENSG00000130165	ELOF1	Y54G11A.11	Y54G11A.11		Transcription elongation factor 1 homolog [Source:UniProtKB/Swiss-Prot;Acc:Q9XVZ8]
ENSG00000122565, ENSG00000108468, ENSG00000094916	CBX1, CBX3, CBX5	hpl-2, hpl-1	hpl-2	CBX3	Chromo-domain protein; HP1 Like (Heterochromatin protein) [Source:UniProtKB/TrEMBL;Acc:G5EDE2]
ENSG00000146005, ENSG00000125637, ENSG00000156011, ENSG00000059915	PSD4, PSD2, PSD, PSD3	efa-6	efa-6	PSD3	Exchange factor for Arf-6 [Source:UniProtKB/Swiss-Prot;Acc:G5EET6]
ENSG00000058804, ENSG00000163354	NDC1, DCST2	npp-22, spe-42	npp-22		Nucleoporin ndc-1 [Source:UniProtKB/Swiss-Prot;Acc:Q8I4N3]
ENSG00000186501	TMEM222	H20J04.6	H20J04.6
ENSG00000149136	SSRP1	hmg-3, hmg-4	hmg-4, hmg-3		FACT complex subunit ssrp1-B [Source:UniProtKB/Swiss-Prot;Acc:O01683]
ENSG00000164104, ENSG00000124097, ENSG00000189403, ENSG00000029993	HMGB3, HMGB1P1, HMGB2, HMGB1	hmg-1.2	hmg-1.2	HMGB3, HMGB1, HMGB2	High mobility group protein 1.2 [Source:UniProtKB/Swiss-Prot;Acc:Q09390]
ENSG00000182979, ENSG00000057935, ENSG00000149480	MTA1, MTA2, MTA3	lin-40	lin-40	MTA1, MTA3
ENSG00000157764, ENSG00000132155, ENSG00000078061	ARAF, BRAF, RAF1	lin-45	lin-45	ARAF, BRAF	Raf homolog serine/threonine-protein kinase [Source:UniProtKB/Swiss-Prot;Acc:Q07292]
ENSG00000096070, ENSG00000100425, ENSG00000156983	BRPF1, BRD1, BRPF3	lin-49	lin-49	BRD1, BRPF3
ENSG00000163754, ENSG00000056998, ENSG00000206159	GYG2P1, GYG1, GYG2	gyg-2, M116.2, gyg-1	gyg-2		GlYcoGenin like [Source:UniProtKB/TrEMBL;Acc:O45819]
ENSG00000100395, ENSG00000163935, ENSG00000198879, ENSG00000011258	MBTD1, SFMBT2, L3MBTL2, SFMBT1	mbtr-1, lin-61	lin-61	SFMBT2	Malignant brain tumor repeat protein 1 [Source:UniProtKB/Swiss-Prot;Acc:A0SQM0]
ENSG00000004700, ENSG00000197299, ENSG00000165392	BLM, WRN, RECQL	him-6, wrn-1, K02F3.12	him-6	WRN	Bloom syndrome protein homolog [Source:UniProtKB/Swiss-Prot;Acc:O18017]
ENSG00000143452, ENSG00000176635	HORMAD2, HORMAD1	htp-1, htp-2, him-3	htp-1, htp-2, him-3		Him-Three Paralog [Source:UniProtKB/TrEMBL;Acc:Q20305]
ENSG00000269384, ENSG00000077935, ENSG00000072501	SMC1B, SMC1A	him-1	him-1	SMC1B, SMC1A	Structural maintenance of chromosomes protein 1 [Source:UniProtKB/Swiss-Prot;Acc:O01789]
ENSG00000189060, ENSG00000124610, ENSG00000168298, ENSG00000184357, ENSG00000178804, ENSG00000187837, ENSG00000124575, ENSG00000187475, ENSG00000184897	H1FX, HIST1H1A, H1FOO, HIST1H1B, H1F0, HIST1H1C, HIST1H1D, HIST1H1T, HIST1H1E	hil-5, hil-1, hil-6, hil-2, hil-4, hil-3, his-24	hil-5, hil-2, hil-4	H1F0	Histone H1.5 [Source:UniProtKB/Swiss-Prot;Acc:O01833]
ENSG00000105486	LIG1	lig-1	lig-1		DNA ligase 1 [Source:UniProtKB/Swiss-Prot;Acc:Q27474]
ENSG00000161395	PGAP3	R01B10.4	R01B10.4
ENSG00000055917, ENSG00000134644	PUM2, PUM1	fbf-2, puf-5, puf-8, fbf-1, puf-9, puf-4, puf-7, puf-3, puf-6, puf-11	fbf-2, puf-5, puf-8, fbf-1, puf-6, puf-11	PUM2, PUM1	Fem-3 mRNA-binding factor 2 [Source:UniProtKB/Swiss-Prot;Acc:Q09312]
ENSG00000132780	NASP	nasp-2, nasp-1	nasp-2		NASP (Human Nuclear Autoantigenic Sperm Protein) homolog [Source:UniProtKB/TrEMBL;Acc:O17687]
ENSG00000142945, ENSG00000141200, ENSG00000186638, ENSG00000068796	KIF24, KIF2B, KIF2A, KIF2C	klp-7	klp-7		Kinesin-like protein [Source:UniProtKB/TrEMBL;Acc:G5ED75]
ENSG00000141551, ENSG00000180138, ENSG00000213923, ENSG00000113712	CSNK1D, CSNK1A1L, CSNK1A1, CSNK1E	kin-19, kin-20	kin-19	CSNK1D, CSNK1A1, CSNK1E	Casein kinase I isoform alpha [Source:UniProtKB/Swiss-Prot;Acc:P42168]
ENSG00000165280	VCP	cdc-48.1, cdc-48.2	cdc-48.2		Transitional endoplasmic reticulum ATPase homolog 1 [Source:UniProtKB/Swiss-Prot;Acc:P54811]
ENSG00000226650, ENSG00000090889	KIF4A, KIF4B	klp-19	klp-19		Kinesin-like protein [Source:UniProtKB/TrEMBL;Acc:O45935]
ENSG00000166136	NDUFB8	Y51H1A.3	Y51H1A.3
ENSG00000142892	PIGK	hpo-4	hpo-4		Putative GPI-anchor transamidase [Source:UniProtKB/Swiss-Prot;Acc:P49048]
ENSG00000062650	WAPL	wapl-1	wapl-1		Wings apart-like protein homolog 1 [Source:UniProtKB/Swiss-Prot;Acc:H2L0H5]
ENSG00000118515, ENSG00000175634, ENSG00000105221, ENSG00000108443, ENSG00000104205, ENSG00000117020, ENSG00000101049, ENSG00000142208	AKT2, SGK3, SGK1, AKT3, AKT1, RPS6KB1, SGK2, RPS6KB2	sgk-1, akt-2, akt-1, rsks-1	akt-1	SGK3, AKT2, AKT3	Serine/threonine-protein kinase sgk-1 [Source:UniProtKB/Swiss-Prot;Acc:Q2PJ68]
ENSG00000117748, ENSG00000204086	RPA4, RPA2	rpa-4, rpa-2	rpa-2		Replication Protein A homolog [Source:UniProtKB/TrEMBL;Acc:Q8I7G2]
ENSG00000197142, ENSG00000123983, ENSG00000151726, ENSG00000068366, ENSG00000164398	ACSL1, ACSL4, ACSL6, ACSL3, ACSL5	acs-17, acs-5, acs-13, acs-4	acs-4	ACSL4, ACSL3	Fatty Acid CoA Synthetase family [Source:UniProtKB/TrEMBL;Acc:Q18660]
ENSG00000124299, ENSG00000196236	XPNPEP3, PEPD	K12C11.1, R119.2	K12C11.1
ENSG00000189079	ARID2	swsn-7	swsn-7	ARID2	SWI/SNF nucleosome remodeling complex component [Source:UniProtKB/Swiss-Prot;Acc:Q09441]
ENSG00000114346	ECT2	ect-2	ect-2		ECT2 (Mammalian Rho GEF) homolog [Source:UniProtKB/TrEMBL;Acc:Q22590]
ENSG00000118705	RPN2	ostd-1	ostd-1		Dolichyl-diphosphooligosaccharide--protein glycosyltransferase subunit 2 [Source:UniProtKB/Swiss-Prot;Acc:P91390]
ENSG00000067900, ENSG00000134318	ROCK2, ROCK1	let-502	let-502	ROCK1	Rho-associated protein kinase let-502 [Source:UniProtKB/Swiss-Prot;Acc:P92199]
ENSG00000176208	ATAD5	Y53F4B.9	Y53F4B.9
ENSG00000025800, ENSG00000186432, ENSG00000196911, ENSG00000114030, ENSG00000102753	KPNA3, KPNA4, KPNA5, KPNA6, KPNA1	ima-3	ima-3	KPNA5, KPNA1, KPNA4	Importin subunit alpha-3 [Source:UniProtKB/Swiss-Prot;Acc:Q19969]
ENSG00000215769, ENSG00000185467, ENSG00000182481	KPNA7, KPNA2, RP13-104F24.2	ima-2	ima-2	KPNA2	Importin subunit alpha-2 [Source:UniProtKB/Swiss-Prot;Acc:P91276]
ENSG00000137200	CMTR1	Y53F4B.13	Y53F4B.13		Cap-specific mRNA (nucleoside-2'-O-)-methyltransferase 1 [Source:UniProtKB/Swiss-Prot;Acc:Q9NAA5]
ENSG00000137824, ENSG00000115841	RMDN3, RMDN2	rmd-6, rmd-2, C16C8.18, rmd-5, rmd-3, rmd-1, rmd-4	rmd-1		Regulator of Microtubule Dynamics [Source:UniProtKB/TrEMBL;Acc:Q966G0]
ENSG00000175766, ENSG00000151247	EIF4E1B, EIF4E	ife-3, ife-1, ife-5, ife-2	ife-1	EIF4E	Eukaryotic translation initiation factor 4E-3 [Source:UniProtKB/Swiss-Prot;Acc:O61955]
ENSG00000149503	INCENP	icp-1	icp-1		InCenP homolog; Incenp-like protein ICP-1 [Source:UniProtKB/TrEMBL;Acc:G5EE37]
ENSG00000198563, ENSG00000229496, ENSG00000215425, ENSG00000235439, ENSG00000225073, ENSG00000225859, ENSG00000230624, ENSG00000237889, ENSG00000123136	DDX39A, DDX39B	hel-1	hel-1		Spliceosome RNA helicase DDX39B homolog [Source:UniProtKB/Swiss-Prot;Acc:Q18212]
ENSG00000146373	RNF217	Y57A10A.31	Y57A10A.31
ENSG00000243668, ENSG00000106610, ENSG00000174353, ENSG00000205583, ENSG00000160828, ENSG00000118007, ENSG00000066923, ENSG00000101972	STAG1, STAG2, STAG3L3, STAG3L4, STAG3L1, STAG3	scc-3	scc-3	STAG1, STAG2	Cohesin subunit scc-3 [Source:UniProtKB/Swiss-Prot;Acc:Q19555]
ENSG00000130313	PGLS	Y57G11C.3	Y57G11C.3		Putative 6-phosphogluconolactonase [Source:UniProtKB/Swiss-Prot;Acc:O18229]
ENSG00000088930, ENSG00000114127	XRN1, XRN2	xrn-2, xrn-1	xrn-1	XRN1	5'-3' exoribonuclease 2 homolog [Source:UniProtKB/Swiss-Prot;Acc:Q9U299]
ENSG00000115694, ENSG00000102572, ENSG00000134602	STK25, STK24, STK26	gck-1	gck-1	STK24	Germinal center kinase 1 [Source:UniProtKB/Swiss-Prot;Acc:H2L099]
ENSG00000268946, ENSG00000085224	ATRX	xnp-1	xnp-1		Transcriptional regulator ATRX homolog [Source:UniProtKB/Swiss-Prot;Acc:Q9U7E0]
ENSG00000102781, ENSG00000186625	KATNAL1, KATNA1	mei-1	mei-1	KATNAL1	Meiotic spindle formation protein mei-1 [Source:UniProtKB/Swiss-Prot;Acc:P34808]
ENSG00000082068	WDR70	gad-1	gad-1		Gastrulation defective protein 1 [Source:UniProtKB/Swiss-Prot;Acc:O16519]
ENSG00000105325	FZR1	fzr-1	fzr-1		FiZzy Related family [Source:UniProtKB/TrEMBL;Acc:Q09649]
ENSG00000204764, ENSG00000130227	XPO7, RANBP17	C35A5.8	C35A5.8	XPO7
ENSG00000177479	ARIH2	T12E12.1	T12E12.1		Potential E3 ubiquitin-protein ligase ariadne-2 [Source:UniProtKB/Swiss-Prot;Acc:Q22431]
ENSG00000128245, ENSG00000170027, ENSG00000164924, ENSG00000108953, ENSG00000166913	YWHAE, YWHAB, YWHAG, YWHAH, YWHAZ	ftt-2, par-5	par-5	YWHAZ, YWHAG	14-3-3-like protein 2 [Source:UniProtKB/Swiss-Prot;Acc:Q20655]
ENSG00000197355, ENSG00000117143	UAP1, UAP1L1	C36A4.4, K06B9.2	C36A4.4		Probable UDP-N-acetylglucosamine pyrophosphorylase [Source:UniProtKB/Swiss-Prot;Acc:Q18493]
ENSG00000134049	IER3IP1	W09G3.8	W09G3.8
ENSG00000102978	POLR2C	rpb-3	rpb-3		RNA Polymerase II (B) subunit [Source:UniProtKB/TrEMBL;Acc:Q93338]
ENSG00000188985, ENSG00000178700, ENSG00000228716	DHFRL1, DHFR, DHFRP1	dhfr-1	dhfr-1		Putative dihydrofolate reductase [Source:UniProtKB/Swiss-Prot;Acc:Q93341]
ENSG00000167281, ENSG00000100320, ENSG00000078328	RBFOX1, RBFOX2, RBFOX3	spn-4, asd-1, fox-1	asd-1		PIP-1 [Source:UniProtKB/TrEMBL;Acc:G5EF02]
ENSG00000105220	GPI	gpi-1	gpi-1		Glucose-6-phosphate isomerase [Source:UniProtKB/TrEMBL;Acc:Q7K707]
ENSG00000204197, ENSG00000167702, ENSG00000140859, ENSG00000233450, ENSG00000237649	KIFC3, KIFC1, KIFC2	klp-17, klp-3, klp-16, klp-15	klp-15, klp-16	KIFC1	Kinesin-like protein [Source:UniProtKB/TrEMBL;Acc:Q23124]
ENSG00000164902	PHAX	Y71H2B.2	Y71H2B.2	PHAX
ENSG00000096060, ENSG00000198225, ENSG00000088832, ENSG00000077800, ENSG00000004478, ENSG00000119782	FKBP1B, FKBP6, FKBP1C, FKBP1A, FKBP5, FKBP4	fkb-2, fkb-6, fkb-8	fkb-6	FKBP4, FKBP5	Peptidylprolyl isomerase [Source:UniProtKB/TrEMBL;Acc:Q9U2Q8]
ENSG00000174106, ENSG00000161904	LEMD3, LEMD2	lem-2	lem-2	LEMD3	LEM protein 2 [Source:UniProtKB/Swiss-Prot;Acc:Q9XTB5]
ENSG00000105202, ENSG00000188573	FBL, FBLL1	fib-1	fib-1		rRNA 2'-O-methyltransferase fibrillarin [Source:UniProtKB/Swiss-Prot;Acc:Q22053]
ENSG00000145604	SKP2	skpt-1	skpt-1		SKP2 (S phase Kinase associated Protein Two) homolog [Source:UniProtKB/TrEMBL;Acc:Q09397]
ENSG00000128016, ENSG00000185650, ENSG00000152518	ZFP36L1, ZFP36, ZFP36L2	oma-2, moe-3, oma-1, ccch-1	oma-1	ZFP36L1, ZFP36L2	CCCH-type zinc finger protein oma-2 [Source:UniProtKB/Swiss-Prot;Acc:Q23359]
ENSG00000057608, ENSG00000203879, ENSG00000268690	GDI2, GDI1	gdi-1	gdi-1		Rab GDP dissociation inhibitor [Source:UniProtKB/TrEMBL;Acc:G5EBR1]
ENSG00000135624	CCT7	cct-7	cct-7		Chaperonin Containing TCP-1 [Source:UniProtKB/TrEMBL;Acc:Q9TZS5]
ENSG00000112984, ENSG00000137807, ENSG00000138182	KIF20A, KIF23, KIF20B	zen-4	zen-4	KIF20B	Kinesin-like protein [Source:UniProtKB/TrEMBL;Acc:G5EG83]
ENSG00000146733	PSPH	Y62E10A.13	Y62E10A.13	PSPH
ENSG00000131711, ENSG00000166963, ENSG00000131016, ENSG00000130479	MAP1S, MAP1A, MAP1B, AKAP12	F25D7.4, C36A4.5, F32A7.5, tag-199	F25D7.4, C36A4.5	AKAP12, MAP1B
ENSG00000138709, ENSG00000155506	LARP1, LARP1B	larp-1	larp-1	LARP1	La-related protein 1 [Source:UniProtKB/Swiss-Prot;Acc:D5MCN2]
ENSG00000175324	LSM1	lsm-1	lsm-1	LSM1	LSM Sm-like protein [Source:UniProtKB/TrEMBL;Acc:Q20229]
ENSG00000155265, ENSG00000147533	GOLGA7B, GOLGA7	Y57G11C.33	Y57G11C.33
ENSG00000172775	FAM192A	C25A1.1	C25A1.1
ENSG00000127588	GNG13	gpc-2	gpc-2		G Protein, Gamma subunit; Heterotrimeric G protein gamma subunit 2 [Source:UniProtKB/TrEMBL;Acc:G5ECT6]
ENSG00000052795, ENSG00000217128	FNIP1, FNIP2	T04C4.1	T04C4.1	FNIP1
ENSG00000092094, ENSG00000128694	OSGEPL1, OSGEP	C01G10.10, Y71H2AM.1	Y71H2AM.1	OSGEPL1	Probable tRNA N6-adenosine threonylcarbamoyltransferase, mitochondrial [Source:UniProtKB/Swiss-Prot;Acc:Q93170]
ENSG00000141580, ENSG00000196998	WDR45, WDR45B	epg-6	epg-6	WDR45	Ectopic P Granules [Source:UniProtKB/TrEMBL;Acc:E3CTH5]
ENSG00000004897	CDC27	mat-1	mat-1		Cell division cycle protein 27 homolog [Source:UniProtKB/Swiss-Prot;Acc:Q9N593]
ENSG00000151470	C4orf33	C33A12.3	C33A12.3	C4orf33
ENSG00000129933	MAU2	mau-2	mau-2		Maternal uncoordinated protein 2 [Source:UniProtKB/Swiss-Prot;Acc:O17581]
ENSG00000134709, ENSG00000095066, ENSG00000168172	HOOK3, HOOK1, HOOK2	zyg-12	zyg-12		Zygote defective protein 12 [Source:UniProtKB/Swiss-Prot;Acc:Q23529]
ENSG00000064651, ENSG00000074803, ENSG00000070915	SLC12A1, SLC12A2, SLC12A3	B0303.11, nkcc-1	nkcc-1		Uncharacterized amino-acid permease B0303.11 [Source:UniProtKB/Swiss-Prot;Acc:P34261]
ENSG00000203995, ENSG00000162378	ZYG11B, ZYG11A	zyg-11	zyg-11		Early embryogenesis protein zyg-11 [Source:UniProtKB/Swiss-Prot;Acc:P21541]
ENSG00000152670, ENSG00000215301, ENSG00000067048	DDX3Y, DDX3X, DDX4	glh-4, F58G11.2, glh-2, glh-3, vbh-1, ZC317.1, mut-14, glh-1, Y38A10A.6, laf-1	vbh-1, mut-14, glh-1		ATP-dependent RNA helicase glh-4 [Source:UniProtKB/Swiss-Prot;Acc:O76743]
ENSG00000083223, ENSG00000164329, ENSG00000134744	PAPD4, ZCCHC11, ZCCHC6	cid-1, gld-2, Y34F4.3, pup-2	gld-2	PAPD4	Caffeine Induced Death (S. pombe Cid) homolog [Source:UniProtKB/TrEMBL;Acc:Q09409]
ENSG00000112531	QKI	gld-1, asd-2	gld-1		Female germline-specific tumor suppressor gld-1 [Source:UniProtKB/Swiss-Prot;Acc:Q17339]
ENSG00000112118	MCM3	mcm-3	mcm-3		DNA helicase [Source:UniProtKB/TrEMBL;Acc:Q9XVR7]
ENSG00000105216, ENSG00000262860, ENSG00000149657	LSM14A, LSM14B	car-1	car-1	LSM14B	Cytokinesis, Apoptosis, RNA-associated [Source:UniProtKB/TrEMBL;Acc:Q9XW17]
ENSG00000149554	CHEK1	Y43D4A.6, chk-1, R02C2.1, kin-34, kin-33, R02C2.6	chk-1	CHEK1
ENSG00000128829	EIF2AK4	gcn-2	gcn-2		Eukaryotic translation initiation factor 2-alpha kinase gcn-2 [Source:UniProtKB/Swiss-Prot;Acc:D0Z5N4]
ENSG00000229048, ENSG00000128951	DUT, DUTP1	dut-1	dut-1		DeoxyUTPase; Deoxyuridinetriphosphatase [Source:UniProtKB/TrEMBL;Acc:G5EET2]
ENSG00000137845	ADAM10	sup-17	sup-17		ADAM 10; SUPpressor [Source:UniProtKB/TrEMBL;Acc:G5EFD9]
ENSG00000166889	PATL1	patr-1	patr-1		Protein PAT1 homolog 1 [Source:UniProtKB/Swiss-Prot;Acc:Q20374]
ENSG00000153989	NUS1	F37B12.3	F37B12.3	NUS1
ENSG00000108504, ENSG00000164885, ENSG00000170312, ENSG00000123374	CDK1, CDK2, CDK5	cdk-2, cdk-1, cdk-5	cdk-2, cdk-1	CDK2	Cyclin-dependent kinase 2 [Source:UniProtKB/Swiss-Prot;Acc:O61847]
ENSG00000077312, ENSG00000125870	SNRPB2, SNRPA	rnp-3, rnp-2	rnp-3	SNRPB2	RNP (RRM RNA binding domain) containing [Source:UniProtKB/TrEMBL;Acc:U4PBX2]
ENSG00000139190, ENSG00000179036, ENSG00000168899, ENSG00000118640, ENSG00000049245, ENSG00000117533, ENSG00000220205	VAMP1, VAMP8, VAMP4, VAMP2, VAMP5, VAMP3	snb-2, Y69A2AR.6, snb-1, B0513.9	snb-1	VAMP4	SyNaptoBrevin related [Source:UniProtKB/TrEMBL;Acc:Q19767]
ENSG00000108671	PSMD11	rpn-6.2, rpn-6.1	rpn-6.1		Probable 26S proteasome regulatory subunit rpn-6.2 [Source:UniProtKB/Swiss-Prot;Acc:P34481]
ENSG00000100138	SNU13	M28.5	M28.5		NHP2-like protein 1 homolog [Source:UniProtKB/Swiss-Prot;Acc:Q21568]
ENSG00000115540	MOB4	C30A5.3	C30A5.3
ENSG00000196839, ENSG00000168803	ADA, ADAL	C44B7.12, C06G3.5	C44B7.12		Adenosine deaminase-like protein [Source:UniProtKB/Swiss-Prot;Acc:Q8IG39]
ENSG00000158552, ENSG00000178381	ZFAND2B, ZFAND2A	aip-1	aip-1		Arsenite Inducible Protein [Source:UniProtKB/TrEMBL;Acc:Q9XUW8]
ENSG00000108055	SMC3	smc-3	smc-3	SMC3	Structural maintenance of chromosomes protein 3 [Source:UniProtKB/Swiss-Prot;Acc:B2FDA8]
ENSG00000092148	HECTD1	hecd-1	hecd-1	HECTD1	HECtD1 ubiquitin ligase homolog [Source:UniProtKB/TrEMBL;Acc:V6CJX7]
ENSG00000163918	RFC4	rfc-4	rfc-4		Replication factor C subunit 4 [Source:UniProtKB/Swiss-Prot;Acc:P53016]
ENSG00000021574, ENSG00000132436, ENSG00000182263	FIGNL1, SPAST, FIGN	spas-1, figl-1	figl-1	SPAST, FIGN	Probable spastin homolog spas-1 [Source:UniProtKB/Swiss-Prot;Acc:Q8MNV0]
ENSG00000114902	SPCS1	C34B2.10	C34B2.10	SPCS1	Probable signal peptidase complex subunit 1 [Source:UniProtKB/Swiss-Prot;Acc:O44953]
ENSG00000155275	TRMT44	C23G10.7	C23G10.7		Probable tRNA (uracil-O(2)-)-methyltransferase [Source:UniProtKB/Swiss-Prot;Acc:Q45EK7]
ENSG00000187555	USP7	math-33	math-33		Ubiquitin carboxyl-terminal hydrolase 7 [Source:UniProtKB/Swiss-Prot;Acc:Q7JKC3]
ENSG00000167986	DDB1	ddb-1	ddb-1		DNA damage-binding protein 1 [Source:UniProtKB/Swiss-Prot;Acc:Q21554]
ENSG00000138385	SSB	C44E4.4	C44E4.4	SSB
ENSG00000117139, ENSG00000012817, ENSG00000126012, ENSG00000008083, ENSG00000073614	KDM5D, KDM5B, JARID2, KDM5C, KDM5A	rbr-2	rbr-2		Lysine-specific demethylase rbr-2 [Source:UniProtKB/Swiss-Prot;Acc:Q23541]
ENSG00000099917	MED15	sel-8, mdt-15	sel-8
ENSG00000167513	CDT1	cdt-1	cdt-1		CDT (S. pombe CDC10 Dependent Transcript) homolog [Source:UniProtKB/TrEMBL;Acc:Q86S68]
ENSG00000163950	SLBP	cdl-1	cdl-1	SLBP	Histone RNA hairpin-binding protein [Source:UniProtKB/Swiss-Prot;Acc:Q09599]
ENSG00000148606, ENSG00000181222	POLR3A, POLR2A	rpc-1, ama-1	ama-1		DNA-directed RNA polymerase subunit [Source:UniProtKB/TrEMBL;Acc:Q18566]
ENSG00000136807	CDK9	cdk-9	cdk-9		Probable cyclin-dependent kinase 9 [Source:UniProtKB/Swiss-Prot;Acc:Q9TVL3]
ENSG00000214255, ENSG00000228981, ENSG00000196183, ENSG00000197149, ENSG00000140988	RPS2P6, RPS2P4, RP11-364L4.1, RP11-452G18.2, RPS2	rps-2	rps-2		40S ribosomal protein S2 [Source:UniProtKB/Swiss-Prot;Acc:P51403]
ENSG00000101361, ENSG00000235796	NOP56	K07C5.4	K07C5.4		Uncharacterized NOP5 family protein K07C5.4 [Source:UniProtKB/Swiss-Prot;Acc:Q21276]
ENSG00000150961, ENSG00000176986	SEC24D, SEC24C	sec-24.1	sec-24.1	SEC24D	Yeast SEC homolog [Source:UniProtKB/TrEMBL;Acc:Q19371]
ENSG00000132964, ENSG00000155111	CDK8, CDK19	cdk-8	cdk-8		Cyclin-dependent kinase 8 [Source:UniProtKB/Swiss-Prot;Acc:P90866]
ENSG00000135250, ENSG00000096063, ENSG00000184343	SRPK1, SRPK3, SRPK2	spk-1	spk-1	SRPK1, SRPK2	Serine/threonine-protein kinase spk-1 [Source:UniProtKB/Swiss-Prot;Acc:Q03563]
ENSG00000164162	ANAPC10	apc-10, Y48G1C.12	Y48G1C.12	ANAPC10	Anaphase-promoting complex subunit 10 [Source:UniProtKB/Swiss-Prot;Acc:H2L2B8]
ENSG00000123728, ENSG00000181467, ENSG00000125249	RAP2B, RAP2C, RAP2A	rap-2	rap-2	RAP2C	RAP homolog (Vertebrate Rap GTPase family) [Source:UniProtKB/TrEMBL;Acc:O17599]
ENSG00000110367, ENSG00000269612	DDX6	cgh-1	cgh-1	DDX6	ATP-dependent RNA helicase cgh-1 [Source:UniProtKB/Swiss-Prot;Acc:Q95YF3]
ENSG00000185379, ENSG00000051180, ENSG00000100206, ENSG00000182185, ENSG00000108384	RAD51B, DMC1, RAD51C, RAD51D, RAD51	rad-51	rad-51		RAD51 short isoform; RecA/Rad51/Dmc1-like protein [Source:UniProtKB/TrEMBL;Acc:G5EGG8]
ENSG00000144366	GULP1	ced-6	ced-6		Cell death protein 6 [Source:UniProtKB/Swiss-Prot;Acc:O76337]
ENSG00000129187	DCTD	ZK643.2	ZK643.2		Probable deoxycytidylate deaminase [Source:UniProtKB/Swiss-Prot;Acc:P30648]
ENSG00000226400, ENSG00000090372, ENSG00000196792, ENSG00000115808	STRN4, STRN, CTD-2269E23.2, STRN3	cash-1	cash-1	STRN4, STRN3	CKA And Striatin Homolog [Source:UniProtKB/TrEMBL;Acc:G5EE12]
ENSG00000175115, ENSG00000179364	PACS1, PACS2	tag-232	tag-232
ENSG00000204310, ENSG00000226467, ENSG00000169692, ENSG00000206324, ENSG00000235758, ENSG00000227642, ENSG00000236873, ENSG00000228892, ENSG00000206255	AGPAT2, AGPAT1	acl-2, acl-1	acl-2		Putative 1-acyl-sn-glycerol-3-phosphate acyltransferase acl-2 [Source:UniProtKB/Swiss-Prot;Acc:Q22267]
ENSG00000069188, ENSG00000146555	SDK2, SDK1	rig-4	rig-4	SDK1	Protein sidekick homolog [Source:UniProtKB/Swiss-Prot;Acc:Q9N3X8]
ENSG00000110711, ENSG00000129221	AIP, AIPL1	C56C10.10	C56C10.10
ENSG00000012983, ENSG00000011566, ENSG00000104814, ENSG00000168067	MAP4K3, MAP4K2, MAP4K5, MAP4K1	gck-2	gck-2	MAP4K3	Mitogen-activated protein kinase kinase kinase kinase [Source:UniProtKB/TrEMBL;Acc:Q23290]
ENSG00000172432, ENSG00000100226	GTPBP2, GTPBP1	cgp-1, T04H1.2	cgp-1	GTPBP2	GTP-binding protein cgp-1 [Source:UniProtKB/Swiss-Prot;Acc:Q18905]
ENSG00000177954, ENSG00000227081, ENSG00000185088	RP11-543P15.1, RPS27L, RPS27	rps-27	rps-27		40S ribosomal protein S27 [Source:UniProtKB/Swiss-Prot;Acc:Q9TXP0]
ENSG00000131873, ENSG00000198108	CHSY1, CHSY3	sqv-5	sqv-5	CHSY1, CHSY3	Chondroitin sulfate synthase sqv-5 [Source:UniProtKB/Swiss-Prot;Acc:Q7Z1Z1]
ENSG00000140350, ENSG00000136938, ENSG00000143401, ENSG00000214619, ENSG00000139223, ENSG00000265346, ENSG00000184701	ANP32A, ANP32E, ANP32B, ANP32D	T19H12.2, F33H2.3	T19H12.2		Acidic leucine-rich nuclear phosphoprotein 32-related protein 2 [Source:UniProtKB/Swiss-Prot;Acc:O01615]
ENSG00000133247, ENSG00000110066	SUV420H1, SUV420H2	set-4	set-4	SUV420H1	Histone-lysine N-methyltransferase Suv4-20 [Source:UniProtKB/Swiss-Prot;Acc:Q09265]
ENSG00000177084	POLE	F33H2.5	F33H2.5
ENSG00000101224, ENSG00000158402, ENSG00000164045	CDC25A, CDC25B, CDC25C	cdc-25.1, cdc-25.3, cdc-25.4, cdc-25.2	cdc-25.1	CDC25A	M-phase inducer phosphatase cdc-25.1 [Source:UniProtKB/Swiss-Prot;Acc:O44552]
ENSG00000220474, ENSG00000182327, ENSG00000224051	CPTP, GLTPD2	K08E4.2, tag-296, F49D11.10	tag-296
ENSG00000165527	ARF6	arf-6	arf-6	ARF6	ADP-Ribosylation Factor related [Source:UniProtKB/TrEMBL;Acc:Q9U2S4]
ENSG00000047410	TPR	npp-21, syp-1	syp-1	TPR	Nuclear Pore complex Protein [Source:UniProtKB/TrEMBL;Acc:Q5WRT9]
ENSG00000144580	RQCD1	ntl-9	ntl-9	RQCD1	NOT-Like (Yeast CCR4/NOT complex component) [Source:UniProtKB/TrEMBL;Acc:Q18224]
ENSG00000094804, ENSG00000085840	CDC6, ORC1	cdc-6, orc-1	cdc-6		Cell Division Cycle related [Source:UniProtKB/TrEMBL;Acc:P91155]
ENSG00000180198, SNHG3-RCC1	RCC1	ran-3	ran-3		Regulator of chromosome condensation [Source:UniProtKB/Swiss-Prot;Acc:Q18211]
ENSG00000112212, ENSG00000100300	TSPO2, TSPO	C41G7.9	C41G7.9
ENSG00000131747, ENSG00000077097	TOP2A, TOP2B	R05D3.12, top-2, cin-4	top-2	TOP2A	Putative DNA topoisomerase 2, mitochondrial [Source:UniProtKB/Swiss-Prot;Acc:P34534]
ENSG00000106771	TMEM245	M01F1.4	M01F1.4
ENSG00000089685	BIRC5	bir-1, bir-2	bir-1		BIR (Baculovirus inhibitory repeat) family; Inhibitor of apoptosis homolog [Source:UniProtKB/TrEMBL;Acc:G5EFA2]
ENSG00000099246	RAB18	rab-18	rab-18	RAB18	Ras-related protein Rab-18 [Source:UniProtKB/Swiss-Prot;Acc:Q8MXS1]
ENSG00000182150, ENSG00000085999, ENSG00000197275	ERCC6L2, RAD54L, RAD54B	rad-54, Y116A8C.13	rad-54	RAD54B
ENSG00000167771, ENSG00000117625, ENSG00000089902	RCOR1, RCOR3, RCOR2	spr-1, Y74C9A.4	spr-1		REST corepressor spr-1 [Source:UniProtKB/Swiss-Prot;Acc:Q18919]

## Sheet: Top 500 FBF OO 25° vs Lin pum
Human ENSG	Human gene symbol	Worm public name	FBF targets (Worm public name)	PUM targets (Human gene symbol)	Gene description
ENSG00000174332, ENSG00000107249	GLIS3, GLIS1	tra-1	tra-1		Sex-determining transformer protein 1 [Source:UniProtKB/Swiss-Prot;Acc:P34708]
ENSG00000004866, ENSG00000007341	ST7, ST7L	F11A10.5	F11A10.5		Protein ST7 homolog [Source:UniProtKB/Swiss-Prot;Acc:Q19337]
ENSG00000187609	EXD3	ZK1098.3, Y57A10A.13, mut-7	mut-7
ENSG00000137513, ENSG00000134440	NARS2, NARS	nars-2, nars-1	nars-1		Asparaginyl(N) Amino-acyl tRNA Synthetase [Source:UniProtKB/TrEMBL;Acc:Q95PZ8]
ENSG00000153487, ENSG00000168395, ENSG00000168556, ENSG00000071243, ENSG00000111653	ING4, ING1, ING2, ING5, ING3	lsy-13, ing-3	ing-3	ING1
ENSG00000135945	REV1	rev-1	rev-1		DNA repair protein REV1 [Source:UniProtKB/TrEMBL;Acc:Q09615]
ENSG00000010292	NCAPD2	dpy-28	dpy-28		Condensin complex subunit 1 [Source:UniProtKB/Swiss-Prot;Acc:Q9U2M1]
ENSG00000113810	SMC4	dpy-27, smc-4	smc-4		Chromosome condensation protein dpy-27 [Source:UniProtKB/Swiss-Prot;Acc:P48996]
ENSG00000138760, ENSG00000135218, ENSG00000073060	SCARB1, SCARB2, CD36	scav-2, scav-4, scav-3, scav-6, scav-5, scav-1	scav-2		SCAVenger receptor (CD36 family) related [Source:UniProtKB/TrEMBL;Acc:G5EBM7]
ENSG00000101888, ENSG00000132661	NXT1, NXT2	nxt-1	nxt-1		NTF2-related export protein [Source:UniProtKB/Swiss-Prot;Acc:Q9U757]
ENSG00000108264, ENSG00000173011	TADA2B	ada-2	ada-2		ADA (Histone acetyltransferase complex) subunit [Source:UniProtKB/TrEMBL;Acc:Q5DX44]
ENSG00000135473	PAN2	panl-2	panl-2		PAN (PolyA-specific riboNucLease) subunit [Source:RefSeq peptide;Acc:NP_498519]
ENSG00000167548, ENSG00000055609	KMT2C, KMT2D	set-16	set-16	KMT2C, KMT2D	Histone-lysine N-methyltransferase [Source:UniProtKB/TrEMBL;Acc:G5EGI1]
ENSG00000062822	POLD1	F10C2.4	F10C2.4		DNA polymerase delta catalytic subunit [Source:UniProtKB/Swiss-Prot;Acc:P90829]
ENSG00000220023, ENSG00000225566, ENSG00000109536, ENSG00000149531	FRG1BP, FRG1	frg-1	frg-1		Protein FRG1 homolog [Source:UniProtKB/Swiss-Prot;Acc:O18282]
ENSG00000180628, ENSG00000056661, ENSG00000185619, ENSG00000168283, ENSG00000156374, ENSG00000115289	BMI1, PCGF6, PCGF1, PCGF5, PCGF3	mig-32	mig-32
ENSG00000154611, ENSG00000101182	PSMA8, PSMA7	pas-4	pas-4		Proteasome subunit alpha type-7 [Source:UniProtKB/Swiss-Prot;Acc:Q95005]
ENSG00000075239, ENSG00000167315, ENSG00000111666, ENSG00000138018, ENSG00000120437, ENSG00000134255	CEPT1, ACAT1, ACAT2, ACAA2, EPT1, CHPT1	F53A2.7, T02G5.4, F54D7.2, cept-1, kat-1, Y49A3A.1, T02G5.7	T02G5.7
ENSG00000143106	PSMA5	pas-5	pas-5		Proteasome subunit alpha type-5 [Source:UniProtKB/Swiss-Prot;Acc:Q95008]
ENSG00000132470, ENSG00000115221, ENSG00000160255, ENSG00000259207, ENSG00000082781, ENSG00000139626, ENSG00000150093	ITGB7, ITGB6, ITGB3, ITGB5, ITGB4, ITGB1, ITGB2	pat-3	pat-3	ITGB1	Integrin beta pat-3 [Source:UniProtKB/Swiss-Prot;Acc:Q27874]
ENSG00000173114, ENSG00000170382, ENSG00000175928	LRRN3, LRRN2, LRRN1	tol-1	tol-1		TOLl (Drosophila) family [Source:UniProtKB/TrEMBL;Acc:Q9N5Z3]
ENSG00000145041	VPRBP	dcaf-1	dcaf-1		DDB1- and CUL4-associated factor homolog 1 [Source:UniProtKB/Swiss-Prot;Acc:Q21106]
ENSG00000108294		pbs-3	pbs-3		Proteasome subunit beta type-3 [Source:UniProtKB/Swiss-Prot;Acc:Q23237]
ENSG00000165775, ENSG00000182814, ENSG00000069509	FUNDC2, FUNDC1, FUNDC2P2	T06D8.7	T06D8.7
ENSG00000185246	PRPF39	F25B4.5	F25B4.5
ENSG00000137992	DBT	ZK669.4	ZK669.4
ENSG00000132182, ENSG00000198284, ENSG00000143552	NUP210P1, NUP210, NUP210L	npp-12	npp-12		Nuclear Pore complex Protein [Source:UniProtKB/TrEMBL;Acc:P91495]
ENSG00000058729	RIOK2	riok-2	riok-2		Serine/threonine-protein kinase RIO2 [Source:UniProtKB/Swiss-Prot;Acc:Q95Q34]
ENSG00000187627, ENSG00000183054, ENSG00000015568, ENSG00000185304, ENSG00000169629, ENSG00000099901, ENSG00000153165, ENSG00000153201, ENSG00000196862	RGPD2, RGPD4, RGPD6, RANBP2, RANBP1, RGPD5, RGPD3, RGPD1, RGPD8	npp-9	npp-9		Nuclear Pore complex Protein [Source:UniProtKB/TrEMBL;Acc:Q21021]
ENSG00000205544	TMEM256	Y106G6H.8	Y106G6H.8
ENSG00000122966	CIT	W02B8.2, F59A6.5	F59A6.5
ENSG00000174669, ENSG00000112759, ENSG00000198246	SLC29A2, SLC29A3, SLC29A1	F16H11.3, C47A4.2, F44D12.9, ent-1, ent-3, ent-2	ent-1		Equilibrative Nucleoside Transporter; Equilibrative nucleoside transporter 1 [Source:UniProtKB/TrEMBL;Acc:G5EDJ3]
ENSG00000154997, ENSG00000138758, ENSG00000125354, ENSG00000164402, ENSG00000186522	SEPT6, SEPT11, SEPT8, SEPT10, SEPT14	unc-61	unc-61
ENSG00000110171, ENSG00000109654	TRIM2, TRIM3	ncl-1, nhl-1	ncl-1		B-box type zinc finger protein ncl-1 [Source:UniProtKB/Swiss-Prot;Acc:P34611]
ENSG00000070540, ENSG00000157954	WIPI1, WIPI2	atg-18	atg-18		AuTophaGy (Yeast Atg homolog) [Source:UniProtKB/TrEMBL;Acc:H2KYN5]
ENSG00000179295, ENSG00000111679, ENSG00000217801	PTPN11, PTPN6, RP11-465B22.3	ptp-2	ptp-2		Tyrosine-protein phosphatase non-receptor type ptp-2 [Source:UniProtKB/Swiss-Prot;Acc:G5EC24]
ENSG00000140905	GCSH	gcsh-1, F52A8.5	F52A8.5		Glycine cleavage system H protein [Source:UniProtKB/TrEMBL;Acc:O62122]
ENSG00000105287, ENSG00000184304, ENSG00000115825	PRKD2, PRKD1, PRKD3	dkf-1, dkf-2	dkf-2	PRKD3	Serine/threonine-protein kinase dkf-1 [Source:UniProtKB/Swiss-Prot;Acc:Q9XUJ7]
ENSG00000235418, ENSG00000196781, ENSG00000104964, ENSG00000106829, ENSG00000104953, ENSG00000065717, ENSG00000140332	TLE4, AES, TLE3, TLE6, TLE1, TLE2	unc-37	unc-37		Transcription factor unc-37 [Source:UniProtKB/Swiss-Prot;Acc:O02482]
ENSG00000165304	MELK	pig-1	pig-1		Maternal embryonic leucine zipper kinase [Source:UniProtKB/Swiss-Prot;Acc:U4PR86]
ENSG00000147955	SIGMAR1	W08F4.3	W08F4.3
ENSG00000065609, ENSG00000073921	PICALM, SNAP91	unc-11	unc-11	PICALM, SNAP91	Phosphatidylinositol-binding clathrin assembly protein unc-11 [Source:UniProtKB/Swiss-Prot;Acc:Q9XZI6]
ENSG00000170638	TRABD	F38A5.2	F38A5.2
ENSG00000124370	MCEE	mce-1	mce-1		Methylmalonyl-CoA Epimerase; Mitochondrial methylmalonyl-CoA epimerase [Source:UniProtKB/TrEMBL;Acc:G5EEG4]
ENSG00000138468, ENSG00000112701	SENP7, SENP6	ulp-4, ulp-2	ulp-2	SENP6	Ubiquitin-like protease 4 [Source:UniProtKB/Swiss-Prot;Acc:Q09275]
ENSG00000198855	FICD	fic-1	fic-1		Adenosine monophosphate-protein transferase FICD homolog [Source:UniProtKB/Swiss-Prot;Acc:Q23544]
ENSG00000244687, ENSG00000240849, ENSG00000124208, ENSG00000169139	TMEM189, UBE2V1, TMEM189-UBE2V1, UBE2V2	Y53C10A.5, uev-1	uev-1
ENSG00000152520	PAN3	panl-3	panl-3		PAB-dependent poly(A)-specific ribonuclease subunit PAN3 [Source:UniProtKB/Swiss-Prot;Acc:P34653]
ENSG00000030066	NUP160	npp-6	npp-6		Nuclear Pore complex Protein [Source:UniProtKB/TrEMBL;Acc:Q8T8M4]
ENSG00000132646	PCNA	pcn-1	pcn-1	PCNA	Proliferating cell nuclear antigen [Source:UniProtKB/Swiss-Prot;Acc:O02115]
ENSG00000152430, ENSG00000205916, ENSG00000205944, ENSG00000187191, ENSG00000188120, ENSG00000092345	DAZ2, DAZ1, DAZ4, DAZ3, DAZL, BOLL	daz-1	daz-1		DAZ protein 1 [Source:UniProtKB/Swiss-Prot;Acc:Q20870]
ENSG00000160695	VPS11	vps-11	vps-11		Vacuolar protein sorting-associated protein 11 homolog [Source:UniProtKB/Swiss-Prot;Acc:Q09600]
ENSG00000198554	WDHD1	F17C11.10	F17C11.10
ENSG00000168175	MAPK1IP1L	C02B10.5	C02B10.5
ENSG00000204518, ENSG00000197953, ENSG00000114771, ENSG00000188984, ENSG00000144959	AADACL2, NCEH1, AADACL4, AADAC, AADACL3	Y43F8A.3, trcs-1, F16F9.4, T09B9.1	trcs-1		TRansport of membrane to Cell Surface [Source:UniProtKB/TrEMBL;Acc:Q19839]
ENSG00000186642	PDE2A	pde-2	pde-2		Probable 3',5'-cyclic phosphodiesterase pde-2 [Source:UniProtKB/Swiss-Prot;Acc:P30645]
ENSG00000155876, ENSG00000083750	RRAGA, RRAGB	raga-1	raga-1		RAs-related GTP-binding protein A [Source:UniProtKB/TrEMBL;Acc:Q22743]
ENSG00000074706, ENSG00000142675, ENSG00000149970, ENSG00000153721	IPCEF1, CNKSR3, CNKSR1, CNKSR2	cnk-1	cnk-1		Connector enhancer of kinase suppressor of ras [Source:UniProtKB/Swiss-Prot;Acc:G5EEW9]
ENSG00000173473, ENSG00000139613	SMARCC1, SMARCC2	swsn-1	swsn-1		SWI/SNF nucleosome remodeling complex component; SWI3-like protein [Source:UniProtKB/TrEMBL;Acc:G5EF87]
ENSG00000115053, ENSG00000160014, ENSG00000143933, ENSG00000231409, ENSG00000241343, ENSG00000178363, ENSG00000214759, ENSG00000165502, ENSG00000198668	RPL36A, CALM1, NCL, CALML3, CALM3, CTD-2509G16.1, RPL36AL, RP11-83J16.1, CALM2	cmd-1, rpl-41, K07H8.10	K07H8.10	CALM3, CALM1, CALM2	Calmodulin [Source:UniProtKB/Swiss-Prot;Acc:O16305]
ENSG00000164327	RICTOR	rict-1	rict-1
ENSG00000157593	SLC35B2	pst-1	pst-1		Adenosine 3'-phospho 5'-phosphosulfate transporter 1 [Source:UniProtKB/Swiss-Prot;Acc:Q8MXJ9]
ENSG00000163539, ENSG00000074054	CLASP1, CLASP2	cls-1, cls-2, cls-3	cls-2	CLASP2
ENSG00000205726, ENSG00000198399	ITSN2, ITSN1	itsn-1	itsn-1		ITSN (Intersectin) family [Source:UniProtKB/TrEMBL;Acc:E6N0W0]
ENSG00000123992	DNPEP	dnpp-1	dnpp-1		Aspartyl aminopeptidase [Source:UniProtKB/Swiss-Prot;Acc:Q19087]
ENSG00000177192	PUS1	pus-1	pus-1		tRNA pseudouridine synthase [Source:UniProtKB/TrEMBL;Acc:Q9XXN0]
ENSG00000166816	LDHD	rrf-1, ego-1, rrf-3, rrf-2, F32D8.12	rrf-3, rrf-1		RNA-dependent RNA polymerase Family; RRF-1 [Source:UniProtKB/TrEMBL;Acc:G5ECM1]
ENSG00000018189, ENSG00000177548, ENSG00000176783, ENSG00000204130, ENSG00000029725	RUFY3, RUFY1, RUFY2, RABEP2, RABEP1	rabn-5	rabn-5	RUFY3	RABaptiN (Rab effector) [Source:UniProtKB/TrEMBL;Acc:Q19088]
ENSG00000039650	PNKP	F21D5.5	F21D5.5
ENSG00000166337	TAF10	taf-10	taf-10		Transcription initiation factor TFIID subunit 10 [Source:UniProtKB/TrEMBL;Acc:Q95ZS0]
ENSG00000102882, ENSG00000100030, ENSG00000166484	MAPK7, MAPK1, MAPK3	F09C12.2, mpk-1, mpk-2	mpk-1	MAPK1, MAPK3	Mitogen-activated protein kinase [Source:UniProtKB/TrEMBL;Acc:Q19243]
ENSG00000079246	XRCC5	cku-80	cku-80		ATP-dependent DNA helicase II subunit 2 [Source:UniProtKB/TrEMBL;Acc:Q21829]
ENSG00000111276	CDKN1B	cki-2	cki-2	CDKN1B	CKI family (Cyclin-dependent Kinase Inhibitor); Cyclin-dependent kinase inhibitor [Source:UniProtKB/TrEMBL;Acc:G5EEJ2]
ENSG00000177646, ENSG00000072778	ACADVL, ACAD9	acdh-12	acdh-12		Acyl CoA DeHydrogenase [Source:UniProtKB/TrEMBL;Acc:Q6AHQ5]
ENSG00000137449, ENSG00000214575, ENSG00000113742, ENSG00000107864	CPEB4, CPEB1, CPEB2, CPEB3	cpb-2, fog-1, cpb-1, cpb-3	cpb-1, cpb-3		Cytoplasmic polyadenylation element-binding protein 2 [Source:UniProtKB/Swiss-Prot;Acc:Q18317]
ENSG00000166579, ENSG00000072864	NDEL1, NDE1	nud-2	nud-2		Aspergillus NUclear Division related [Source:UniProtKB/TrEMBL;Acc:O45717]
ENSG00000118454	ANKRD13C	C01F1.6	C01F1.6
ENSG00000184481, ENSG00000150907, ENSG00000204060, ENSG00000118689	FOXO3, FOXO4, FOXO1, FOXO6	daf-16	daf-16		Forkhead box protein O [Source:UniProtKB/Swiss-Prot;Acc:O16850]
ENSG00000083123	BCKDHB	tag-173	tag-173
ENSG00000140451	PIF1	pif-1	pif-1		ATP-dependent DNA helicase PIF1 [Source:UniProtKB/TrEMBL;Acc:G5EFV7]
ENSG00000168002	POLR2G	rpb-7	rpb-7		RNA Polymerase II (B) subunit [Source:UniProtKB/TrEMBL;Acc:Q9N3C9]
ENSG00000132383	RPA1	rpa-1	rpa-1		Probable replication factor A 73 kDa subunit [Source:UniProtKB/Swiss-Prot;Acc:Q19537]
ENSG00000173406, ENSG00000153071	DAB1, DAB2	dab-1	dab-1		DAB (Drosophila disabled) homolog [Source:UniProtKB/TrEMBL;Acc:A5JYR4]
ENSG00000161800	RACGAP1	cyk-4	cyk-4		CYtoKinesis defect [Source:UniProtKB/TrEMBL;Acc:Q9XUS9]
ENSG00000144233, ENSG00000101935	AMMECR1L, AMMECR1	R166.3	R166.3
ENSG00000197181, ENSG00000134627, ENSG00000125207, ENSG00000184571	PIWIL2, PIWIL3, PIWIL4, PIWIL1	prg-1, prg-2	prg-1		Piwi-like protein [Source:UniProtKB/TrEMBL;Acc:P90786]
ENSG00000164190	NIPBL	pqn-85	pqn-85	NIPBL	Nipped-B-like protein pqn-85 [Source:UniProtKB/Swiss-Prot;Acc:Q95XZ5]
ENSG00000243244, ENSG00000242441, ENSG00000165417, ENSG00000068781, ENSG00000140022	STON1-GTF2A1L, GTF2A1, STON1, GTF2A1L, STON2	unc-41, pqn-51	pqn-51		Putative stoned B-like protein [Source:UniProtKB/Swiss-Prot;Acc:P90761]
ENSG00000184708	EIF4ENIF1	ifet-1	ifet-1	EIF4ENIF1	Translational repressor ifet-1 [Source:UniProtKB/Swiss-Prot;Acc:Q20898]
ENSG00000178719, ENSG00000135472, ENSG00000155957, ENSG00000135926	TMBIM4, FAIM2, GRINA, TMBIM1	tag-120, xbx-6, tmbi-4, Y42H9AR.2	xbx-6
ENSG00000213341, ENSG00000143466, ENSG00000183735, ENSG00000104365	TBK1, IKBKB, CHUK	Y39G8B.5, ikke-1	ikke-1	TBK1
ENSG00000196981, ENSG00000196363	WDR5B, WDR5	wdr-5.3, wdr-5.2, wdr-5.1	wdr-5.3		WD repeat-containing protein wdr-5.3 [Source:UniProtKB/Swiss-Prot;Acc:Q23256]
ENSG00000108094	CUL2	cul-2	cul-2		Cullin-2 [Source:UniProtKB/Swiss-Prot;Acc:Q17390]
ENSG00000198056	PRIM1	T24C4.5, pri-1	pri-1		DNA primase [Source:UniProtKB/TrEMBL;Acc:Q9TZ34]
ENSG00000147082, ENSG00000134057, ENSG00000157456, ENSG00000133101, ENSG00000145386	CCNA2, CCNB1, CCNB3, CCNA1, CCNB2	cyb-2.1, cyb-3, ZK507.6, cyb-2.2, cyb-1	cyb-2.2, cyb-2.1, cyb-1		CYclin B [Source:UniProtKB/TrEMBL;Acc:O45926]
ENSG00000175305, ENSG00000105173	CCNE2, CCNE1	cye-1	cye-1		G1/S-specific cyclin-E [Source:UniProtKB/Swiss-Prot;Acc:O01501]
ENSG00000165794, ENSG00000141873, ENSG00000143570	SLC39A1, SLC39A3, SLC39A2	F30B5.7, C06G8.3, F55F8.9, F31C3.4, Y54G9A.4	F31C3.4, F55F8.9
ENSG00000102144, ENSG00000170950, ENSG00000269666	PGK1, PGK2	pgk-1	pgk-1		Probable phosphoglycerate kinase [Source:UniProtKB/Swiss-Prot;Acc:P91427]
ENSG00000166851, ENSG00000145632, ENSG00000237810, ENSG00000173846	CTD-2571E19.3, PLK2, PLK3, PLK1	plk-1, plk-3, plk-2	plk-3		Serine/threonine-protein kinase plk-1 [Source:UniProtKB/Swiss-Prot;Acc:P34331]
ENSG00000206557	TRIM71	lin-41	lin-41
ENSG00000101460, ENSG00000171471, ENSG00000140941	MAP1LC3A, MAP1LC3B	lgg-2	lgg-2
ENSG00000183765	CHEK2	chk-2, T08D2.7	chk-2		Serine/threonine-protein kinase chk-2 [Source:UniProtKB/Swiss-Prot;Acc:Q9U1Y5]
ENSG00000103502	CDIPT	pisy-1	pisy-1		CDP-diacylglycerol--inositol 3-phosphatidyltransferase [Source:UniProtKB/TrEMBL;Acc:Q9U2G1]
ENSG00000138604	GLCE	hse-5	hse-5		D-glucuronyl C5-epimerase [Source:UniProtKB/Swiss-Prot;Acc:P46555]
ENSG00000080007, ENSG00000184735	DDX53, DDX43	Y54G11A.3	Y54G11A.3
ENSG00000105983, ENSG00000139636	LMBR1, LMBR1L	R05D3.2	R05D3.2		LIMR family protein R05D3.2 [Source:UniProtKB/Swiss-Prot;Acc:P34535]
ENSG00000130165	ELOF1	Y54G11A.11	Y54G11A.11		Transcription elongation factor 1 homolog [Source:UniProtKB/Swiss-Prot;Acc:Q9XVZ8]
ENSG00000122565, ENSG00000108468, ENSG00000094916	CBX1, CBX3, CBX5	hpl-2, hpl-1	hpl-2	CBX5	Chromo-domain protein; HP1 Like (Heterochromatin protein) [Source:UniProtKB/TrEMBL;Acc:G5EDE2]
ENSG00000146005, ENSG00000125637, ENSG00000156011, ENSG00000059915	PSD4, PSD2, PSD, PSD3	efa-6	efa-6	PSD, PSD3	Exchange factor for Arf-6 [Source:UniProtKB/Swiss-Prot;Acc:G5EET6]
ENSG00000058804, ENSG00000163354	NDC1, DCST2	npp-22, spe-42	npp-22		Nucleoporin ndc-1 [Source:UniProtKB/Swiss-Prot;Acc:Q8I4N3]
ENSG00000186501	TMEM222	H20J04.6	H20J04.6
ENSG00000149136	SSRP1	hmg-3, hmg-4	hmg-4, hmg-3		FACT complex subunit ssrp1-B [Source:UniProtKB/Swiss-Prot;Acc:O01683]
ENSG00000164104, ENSG00000124097, ENSG00000189403, ENSG00000029993	HMGB3, HMGB1P1, HMGB2, HMGB1	hmg-1.2	hmg-1.2	HMGB3	High mobility group protein 1.2 [Source:UniProtKB/Swiss-Prot;Acc:Q09390]
ENSG00000182979, ENSG00000057935, ENSG00000149480	MTA1, MTA2, MTA3	lin-40	lin-40
ENSG00000157764, ENSG00000132155, ENSG00000078061	ARAF, BRAF, RAF1	lin-45	lin-45	ARAF	Raf homolog serine/threonine-protein kinase [Source:UniProtKB/Swiss-Prot;Acc:Q07292]
ENSG00000096070, ENSG00000100425, ENSG00000156983	BRPF1, BRD1, BRPF3	lin-49	lin-49	BRPF1, BRD1
ENSG00000163754, ENSG00000056998, ENSG00000206159	GYG2P1, GYG1, GYG2	gyg-2, M116.2, gyg-1	gyg-2		GlYcoGenin like [Source:UniProtKB/TrEMBL;Acc:O45819]
ENSG00000100395, ENSG00000163935, ENSG00000198879, ENSG00000011258	MBTD1, SFMBT2, L3MBTL2, SFMBT1	mbtr-1, lin-61	lin-61		Malignant brain tumor repeat protein 1 [Source:UniProtKB/Swiss-Prot;Acc:A0SQM0]
ENSG00000004700, ENSG00000197299, ENSG00000165392	BLM, WRN, RECQL	him-6, wrn-1, K02F3.12	him-6		Bloom syndrome protein homolog [Source:UniProtKB/Swiss-Prot;Acc:O18017]
ENSG00000143452, ENSG00000176635	HORMAD2, HORMAD1	htp-1, htp-2, him-3	htp-1, htp-2, him-3		Him-Three Paralog [Source:UniProtKB/TrEMBL;Acc:Q20305]
ENSG00000269384, ENSG00000077935, ENSG00000072501	SMC1B, SMC1A	him-1	him-1		Structural maintenance of chromosomes protein 1 [Source:UniProtKB/Swiss-Prot;Acc:O01789]
ENSG00000189060, ENSG00000124610, ENSG00000168298, ENSG00000184357, ENSG00000178804, ENSG00000187837, ENSG00000124575, ENSG00000187475, ENSG00000184897	H1FX, HIST1H1A, H1FOO, HIST1H1B, H1F0, HIST1H1C, HIST1H1D, HIST1H1T, HIST1H1E	hil-5, hil-1, hil-6, hil-2, hil-4, hil-3, his-24	hil-5, hil-2, hil-4	H1F0	Histone H1.5 [Source:UniProtKB/Swiss-Prot;Acc:O01833]
ENSG00000105486	LIG1	lig-1	lig-1		DNA ligase 1 [Source:UniProtKB/Swiss-Prot;Acc:Q27474]
ENSG00000161395	PGAP3	R01B10.4	R01B10.4
ENSG00000055917, ENSG00000134644	PUM2, PUM1	fbf-2, puf-5, puf-8, fbf-1, puf-9, puf-4, puf-7, puf-3, puf-6, puf-11	fbf-2, puf-5, puf-8, fbf-1, puf-6, puf-11	PUM2, PUM1	Fem-3 mRNA-binding factor 2 [Source:UniProtKB/Swiss-Prot;Acc:Q09312]
ENSG00000132780	NASP	nasp-2, nasp-1	nasp-2		NASP (Human Nuclear Autoantigenic Sperm Protein) homolog [Source:UniProtKB/TrEMBL;Acc:O17687]
ENSG00000142945, ENSG00000141200, ENSG00000186638, ENSG00000068796	KIF24, KIF2B, KIF2A, KIF2C	klp-7	klp-7	KIF2A	Kinesin-like protein [Source:UniProtKB/TrEMBL;Acc:G5ED75]
ENSG00000141551, ENSG00000180138, ENSG00000213923, ENSG00000113712	CSNK1D, CSNK1A1L, CSNK1A1, CSNK1E	kin-19, kin-20	kin-19	CSNK1D, CSNK1A1	Casein kinase I isoform alpha [Source:UniProtKB/Swiss-Prot;Acc:P42168]
ENSG00000165280	VCP	cdc-48.1, cdc-48.2	cdc-48.2		Transitional endoplasmic reticulum ATPase homolog 1 [Source:UniProtKB/Swiss-Prot;Acc:P54811]
ENSG00000226650, ENSG00000090889	KIF4A, KIF4B	klp-19	klp-19		Kinesin-like protein [Source:UniProtKB/TrEMBL;Acc:O45935]
ENSG00000166136	NDUFB8	Y51H1A.3	Y51H1A.3
ENSG00000142892	PIGK	hpo-4	hpo-4		Putative GPI-anchor transamidase [Source:UniProtKB/Swiss-Prot;Acc:P49048]
ENSG00000062650	WAPL	wapl-1	wapl-1	WAPL	Wings apart-like protein homolog 1 [Source:UniProtKB/Swiss-Prot;Acc:H2L0H5]
ENSG00000118515, ENSG00000175634, ENSG00000105221, ENSG00000108443, ENSG00000104205, ENSG00000117020, ENSG00000101049, ENSG00000142208	AKT2, SGK3, SGK1, AKT3, AKT1, RPS6KB1, SGK2, RPS6KB2	sgk-1, akt-2, akt-1, rsks-1	akt-1	AKT3, SGK1	Serine/threonine-protein kinase sgk-1 [Source:UniProtKB/Swiss-Prot;Acc:Q2PJ68]
ENSG00000117748, ENSG00000204086	RPA4, RPA2	rpa-4, rpa-2	rpa-2		Replication Protein A homolog [Source:UniProtKB/TrEMBL;Acc:Q8I7G2]
ENSG00000197142, ENSG00000123983, ENSG00000151726, ENSG00000068366, ENSG00000164398	ACSL1, ACSL4, ACSL6, ACSL3, ACSL5	acs-17, acs-5, acs-13, acs-4	acs-4	ACSL3	Fatty Acid CoA Synthetase family [Source:UniProtKB/TrEMBL;Acc:Q18660]
ENSG00000124299, ENSG00000196236	XPNPEP3, PEPD	K12C11.1, R119.2	K12C11.1
ENSG00000189079	ARID2	swsn-7	swsn-7	ARID2	SWI/SNF nucleosome remodeling complex component [Source:UniProtKB/Swiss-Prot;Acc:Q09441]
ENSG00000114346	ECT2	ect-2	ect-2		ECT2 (Mammalian Rho GEF) homolog [Source:UniProtKB/TrEMBL;Acc:Q22590]
ENSG00000118705	RPN2	ostd-1	ostd-1	RPN2	Dolichyl-diphosphooligosaccharide--protein glycosyltransferase subunit 2 [Source:UniProtKB/Swiss-Prot;Acc:P91390]
ENSG00000067900, ENSG00000134318	ROCK2, ROCK1	let-502	let-502	ROCK2	Rho-associated protein kinase let-502 [Source:UniProtKB/Swiss-Prot;Acc:P92199]
ENSG00000176208	ATAD5	Y53F4B.9	Y53F4B.9
ENSG00000025800, ENSG00000186432, ENSG00000196911, ENSG00000114030, ENSG00000102753	KPNA3, KPNA4, KPNA5, KPNA6, KPNA1	ima-3	ima-3		Importin subunit alpha-3 [Source:UniProtKB/Swiss-Prot;Acc:Q19969]
ENSG00000215769, ENSG00000185467, ENSG00000182481	KPNA7, KPNA2, RP13-104F24.2	ima-2	ima-2		Importin subunit alpha-2 [Source:UniProtKB/Swiss-Prot;Acc:P91276]
ENSG00000137200	CMTR1	Y53F4B.13	Y53F4B.13		Cap-specific mRNA (nucleoside-2'-O-)-methyltransferase 1 [Source:UniProtKB/Swiss-Prot;Acc:Q9NAA5]
ENSG00000137824, ENSG00000115841	RMDN3, RMDN2	rmd-6, rmd-2, C16C8.18, rmd-5, rmd-3, rmd-1, rmd-4	rmd-1		Regulator of Microtubule Dynamics [Source:UniProtKB/TrEMBL;Acc:Q966G0]
ENSG00000175766, ENSG00000151247	EIF4E1B, EIF4E	ife-3, ife-1, ife-5, ife-2	ife-1		Eukaryotic translation initiation factor 4E-3 [Source:UniProtKB/Swiss-Prot;Acc:O61955]
ENSG00000149503	INCENP	icp-1	icp-1		InCenP homolog; Incenp-like protein ICP-1 [Source:UniProtKB/TrEMBL;Acc:G5EE37]
ENSG00000198563, ENSG00000229496, ENSG00000215425, ENSG00000235439, ENSG00000225073, ENSG00000225859, ENSG00000230624, ENSG00000237889, ENSG00000123136	DDX39A, DDX39B	hel-1	hel-1		Spliceosome RNA helicase DDX39B homolog [Source:UniProtKB/Swiss-Prot;Acc:Q18212]
ENSG00000146373	RNF217	Y57A10A.31	Y57A10A.31
ENSG00000243668, ENSG00000106610, ENSG00000174353, ENSG00000205583, ENSG00000160828, ENSG00000118007, ENSG00000066923, ENSG00000101972	STAG1, STAG2, STAG3L3, STAG3L4, STAG3L1, STAG3	scc-3	scc-3	STAG2	Cohesin subunit scc-3 [Source:UniProtKB/Swiss-Prot;Acc:Q19555]
ENSG00000130313	PGLS	Y57G11C.3	Y57G11C.3		Putative 6-phosphogluconolactonase [Source:UniProtKB/Swiss-Prot;Acc:O18229]
ENSG00000088930, ENSG00000114127	XRN1, XRN2	xrn-2, xrn-1	xrn-1		5'-3' exoribonuclease 2 homolog [Source:UniProtKB/Swiss-Prot;Acc:Q9U299]
ENSG00000115694, ENSG00000102572, ENSG00000134602	STK25, STK24, STK26	gck-1	gck-1		Germinal center kinase 1 [Source:UniProtKB/Swiss-Prot;Acc:H2L099]
ENSG00000268946, ENSG00000085224	ATRX	xnp-1	xnp-1		Transcriptional regulator ATRX homolog [Source:UniProtKB/Swiss-Prot;Acc:Q9U7E0]
ENSG00000102781, ENSG00000186625	KATNAL1, KATNA1	mei-1	mei-1		Meiotic spindle formation protein mei-1 [Source:UniProtKB/Swiss-Prot;Acc:P34808]
ENSG00000082068	WDR70	gad-1	gad-1		Gastrulation defective protein 1 [Source:UniProtKB/Swiss-Prot;Acc:O16519]
ENSG00000105325	FZR1	fzr-1	fzr-1	FZR1	FiZzy Related family [Source:UniProtKB/TrEMBL;Acc:Q09649]
ENSG00000204764, ENSG00000130227	XPO7, RANBP17	C35A5.8	C35A5.8
ENSG00000177479	ARIH2	T12E12.1	T12E12.1		Potential E3 ubiquitin-protein ligase ariadne-2 [Source:UniProtKB/Swiss-Prot;Acc:Q22431]
ENSG00000128245, ENSG00000170027, ENSG00000164924, ENSG00000108953, ENSG00000166913	YWHAE, YWHAB, YWHAG, YWHAH, YWHAZ	ftt-2, par-5	par-5	YWHAB, YWHAZ, YWHAE	14-3-3-like protein 2 [Source:UniProtKB/Swiss-Prot;Acc:Q20655]
ENSG00000197355, ENSG00000117143	UAP1, UAP1L1	C36A4.4, K06B9.2	C36A4.4		Probable UDP-N-acetylglucosamine pyrophosphorylase [Source:UniProtKB/Swiss-Prot;Acc:Q18493]
ENSG00000134049	IER3IP1	W09G3.8	W09G3.8
ENSG00000102978	POLR2C	rpb-3	rpb-3		RNA Polymerase II (B) subunit [Source:UniProtKB/TrEMBL;Acc:Q93338]
ENSG00000188985, ENSG00000178700, ENSG00000228716	DHFRL1, DHFR, DHFRP1	dhfr-1	dhfr-1		Putative dihydrofolate reductase [Source:UniProtKB/Swiss-Prot;Acc:Q93341]
ENSG00000167281, ENSG00000100320, ENSG00000078328	RBFOX1, RBFOX2, RBFOX3	spn-4, asd-1, fox-1	asd-1	RBFOX2	PIP-1 [Source:UniProtKB/TrEMBL;Acc:G5EF02]
ENSG00000105220	GPI	gpi-1	gpi-1		Glucose-6-phosphate isomerase [Source:UniProtKB/TrEMBL;Acc:Q7K707]
ENSG00000204197, ENSG00000167702, ENSG00000140859, ENSG00000233450, ENSG00000237649	KIFC3, KIFC1, KIFC2	klp-17, klp-3, klp-16, klp-15	klp-15, klp-16	KIFC3	Kinesin-like protein [Source:UniProtKB/TrEMBL;Acc:Q23124]
ENSG00000164902	PHAX	Y71H2B.2	Y71H2B.2
ENSG00000096060, ENSG00000198225, ENSG00000088832, ENSG00000077800, ENSG00000004478, ENSG00000119782	FKBP1B, FKBP6, FKBP1C, FKBP1A, FKBP5, FKBP4	fkb-2, fkb-6, fkb-8	fkb-6	FKBP1A	Peptidylprolyl isomerase [Source:UniProtKB/TrEMBL;Acc:Q9U2Q8]
ENSG00000174106, ENSG00000161904	LEMD3, LEMD2	lem-2	lem-2	LEMD3	LEM protein 2 [Source:UniProtKB/Swiss-Prot;Acc:Q9XTB5]
ENSG00000105202, ENSG00000188573	FBL, FBLL1	fib-1	fib-1		rRNA 2'-O-methyltransferase fibrillarin [Source:UniProtKB/Swiss-Prot;Acc:Q22053]
ENSG00000145604	SKP2	skpt-1	skpt-1		SKP2 (S phase Kinase associated Protein Two) homolog [Source:UniProtKB/TrEMBL;Acc:Q09397]
ENSG00000128016, ENSG00000185650, ENSG00000152518	ZFP36L1, ZFP36, ZFP36L2	oma-2, moe-3, oma-1, ccch-1	oma-1	ZFP36L1	CCCH-type zinc finger protein oma-2 [Source:UniProtKB/Swiss-Prot;Acc:Q23359]
ENSG00000057608, ENSG00000203879, ENSG00000268690	GDI2, GDI1	gdi-1	gdi-1	GDI2	Rab GDP dissociation inhibitor [Source:UniProtKB/TrEMBL;Acc:G5EBR1]
ENSG00000135624	CCT7	cct-7	cct-7		Chaperonin Containing TCP-1 [Source:UniProtKB/TrEMBL;Acc:Q9TZS5]
ENSG00000112984, ENSG00000137807, ENSG00000138182	KIF20A, KIF23, KIF20B	zen-4	zen-4		Kinesin-like protein [Source:UniProtKB/TrEMBL;Acc:G5EG83]
ENSG00000146733	PSPH	Y62E10A.13	Y62E10A.13
ENSG00000131711, ENSG00000166963, ENSG00000131016, ENSG00000130479	MAP1S, MAP1A, MAP1B, AKAP12	F25D7.4, C36A4.5, F32A7.5, tag-199	F25D7.4, C36A4.5	MAP1B
ENSG00000138709, ENSG00000155506	LARP1, LARP1B	larp-1	larp-1	LARP1	La-related protein 1 [Source:UniProtKB/Swiss-Prot;Acc:D5MCN2]
ENSG00000175324	LSM1	lsm-1	lsm-1		LSM Sm-like protein [Source:UniProtKB/TrEMBL;Acc:Q20229]
ENSG00000155265, ENSG00000147533	GOLGA7B, GOLGA7	Y57G11C.33	Y57G11C.33
ENSG00000172775	FAM192A	C25A1.1	C25A1.1
ENSG00000127588	GNG13	gpc-2	gpc-2		G Protein, Gamma subunit; Heterotrimeric G protein gamma subunit 2 [Source:UniProtKB/TrEMBL;Acc:G5ECT6]
ENSG00000052795, ENSG00000217128	FNIP1, FNIP2	T04C4.1	T04C4.1
ENSG00000092094, ENSG00000128694	OSGEPL1, OSGEP	C01G10.10, Y71H2AM.1	Y71H2AM.1		Probable tRNA N6-adenosine threonylcarbamoyltransferase, mitochondrial [Source:UniProtKB/Swiss-Prot;Acc:Q93170]
ENSG00000141580, ENSG00000196998	WDR45, WDR45B	epg-6	epg-6		Ectopic P Granules [Source:UniProtKB/TrEMBL;Acc:E3CTH5]
ENSG00000004897	CDC27	mat-1	mat-1		Cell division cycle protein 27 homolog [Source:UniProtKB/Swiss-Prot;Acc:Q9N593]
ENSG00000151470	C4orf33	C33A12.3	C33A12.3
ENSG00000129933	MAU2	mau-2	mau-2		Maternal uncoordinated protein 2 [Source:UniProtKB/Swiss-Prot;Acc:O17581]
ENSG00000134709, ENSG00000095066, ENSG00000168172	HOOK3, HOOK1, HOOK2	zyg-12	zyg-12		Zygote defective protein 12 [Source:UniProtKB/Swiss-Prot;Acc:Q23529]
ENSG00000064651, ENSG00000074803, ENSG00000070915	SLC12A1, SLC12A2, SLC12A3	B0303.11, nkcc-1	nkcc-1		Uncharacterized amino-acid permease B0303.11 [Source:UniProtKB/Swiss-Prot;Acc:P34261]
ENSG00000203995, ENSG00000162378	ZYG11B, ZYG11A	zyg-11	zyg-11	ZYG11B	Early embryogenesis protein zyg-11 [Source:UniProtKB/Swiss-Prot;Acc:P21541]
ENSG00000152670, ENSG00000215301, ENSG00000067048	DDX3Y, DDX3X, DDX4	glh-4, F58G11.2, glh-2, glh-3, vbh-1, ZC317.1, mut-14, glh-1, Y38A10A.6, laf-1	vbh-1, mut-14, glh-1		ATP-dependent RNA helicase glh-4 [Source:UniProtKB/Swiss-Prot;Acc:O76743]
ENSG00000083223, ENSG00000164329, ENSG00000134744	PAPD4, ZCCHC11, ZCCHC6	cid-1, gld-2, Y34F4.3, pup-2	gld-2		Caffeine Induced Death (S. pombe Cid) homolog [Source:UniProtKB/TrEMBL;Acc:Q09409]
ENSG00000112531	QKI	gld-1, asd-2	gld-1		Female germline-specific tumor suppressor gld-1 [Source:UniProtKB/Swiss-Prot;Acc:Q17339]
ENSG00000112118	MCM3	mcm-3	mcm-3		DNA helicase [Source:UniProtKB/TrEMBL;Acc:Q9XVR7]
ENSG00000105216, ENSG00000262860, ENSG00000149657	LSM14A, LSM14B	car-1	car-1	LSM14B	Cytokinesis, Apoptosis, RNA-associated [Source:UniProtKB/TrEMBL;Acc:Q9XW17]
ENSG00000149554	CHEK1	Y43D4A.6, chk-1, R02C2.1, kin-34, kin-33, R02C2.6	chk-1
ENSG00000128829	EIF2AK4	gcn-2	gcn-2		Eukaryotic translation initiation factor 2-alpha kinase gcn-2 [Source:UniProtKB/Swiss-Prot;Acc:D0Z5N4]
ENSG00000229048, ENSG00000128951	DUT, DUTP1	dut-1	dut-1		DeoxyUTPase; Deoxyuridinetriphosphatase [Source:UniProtKB/TrEMBL;Acc:G5EET2]
ENSG00000137845	ADAM10	sup-17	sup-17	ADAM10	ADAM 10; SUPpressor [Source:UniProtKB/TrEMBL;Acc:G5EFD9]
ENSG00000166889	PATL1	patr-1	patr-1		Protein PAT1 homolog 1 [Source:UniProtKB/Swiss-Prot;Acc:Q20374]
ENSG00000153989	NUS1	F37B12.3	F37B12.3	NUS1
ENSG00000108504, ENSG00000164885, ENSG00000170312, ENSG00000123374	CDK1, CDK2, CDK5	cdk-2, cdk-1, cdk-5	cdk-2, cdk-1		Cyclin-dependent kinase 2 [Source:UniProtKB/Swiss-Prot;Acc:O61847]
ENSG00000077312, ENSG00000125870	SNRPB2, SNRPA	rnp-3, rnp-2	rnp-3		RNP (RRM RNA binding domain) containing [Source:UniProtKB/TrEMBL;Acc:U4PBX2]
ENSG00000139190, ENSG00000179036, ENSG00000168899, ENSG00000118640, ENSG00000049245, ENSG00000117533, ENSG00000220205	VAMP1, VAMP8, VAMP4, VAMP2, VAMP5, VAMP3	snb-2, Y69A2AR.6, snb-1, B0513.9	snb-1	VAMP2	SyNaptoBrevin related [Source:UniProtKB/TrEMBL;Acc:Q19767]
ENSG00000108671	PSMD11	rpn-6.2, rpn-6.1	rpn-6.1		Probable 26S proteasome regulatory subunit rpn-6.2 [Source:UniProtKB/Swiss-Prot;Acc:P34481]
ENSG00000100138	SNU13	M28.5	M28.5		NHP2-like protein 1 homolog [Source:UniProtKB/Swiss-Prot;Acc:Q21568]
ENSG00000115540	MOB4	C30A5.3	C30A5.3	MOB4
ENSG00000196839, ENSG00000168803	ADA, ADAL	C44B7.12, C06G3.5	C44B7.12		Adenosine deaminase-like protein [Source:UniProtKB/Swiss-Prot;Acc:Q8IG39]
ENSG00000158552, ENSG00000178381	ZFAND2B, ZFAND2A	aip-1	aip-1		Arsenite Inducible Protein [Source:UniProtKB/TrEMBL;Acc:Q9XUW8]
ENSG00000108055	SMC3	smc-3	smc-3	SMC3	Structural maintenance of chromosomes protein 3 [Source:UniProtKB/Swiss-Prot;Acc:B2FDA8]
ENSG00000092148	HECTD1	hecd-1	hecd-1		HECtD1 ubiquitin ligase homolog [Source:UniProtKB/TrEMBL;Acc:V6CJX7]
ENSG00000163918	RFC4	rfc-4	rfc-4		Replication factor C subunit 4 [Source:UniProtKB/Swiss-Prot;Acc:P53016]
ENSG00000021574, ENSG00000132436, ENSG00000182263	FIGNL1, SPAST, FIGN	spas-1, figl-1	figl-1	SPAST	Probable spastin homolog spas-1 [Source:UniProtKB/Swiss-Prot;Acc:Q8MNV0]
ENSG00000114902	SPCS1	C34B2.10	C34B2.10		Probable signal peptidase complex subunit 1 [Source:UniProtKB/Swiss-Prot;Acc:O44953]
ENSG00000155275	TRMT44	C23G10.7	C23G10.7		Probable tRNA (uracil-O(2)-)-methyltransferase [Source:UniProtKB/Swiss-Prot;Acc:Q45EK7]
ENSG00000187555	USP7	math-33	math-33		Ubiquitin carboxyl-terminal hydrolase 7 [Source:UniProtKB/Swiss-Prot;Acc:Q7JKC3]
ENSG00000167986	DDB1	ddb-1	ddb-1		DNA damage-binding protein 1 [Source:UniProtKB/Swiss-Prot;Acc:Q21554]
ENSG00000138385	SSB	C44E4.4	C44E4.4	SSB
ENSG00000117139, ENSG00000012817, ENSG00000126012, ENSG00000008083, ENSG00000073614	KDM5D, KDM5B, JARID2, KDM5C, KDM5A	rbr-2	rbr-2	KDM5C, JARID2	Lysine-specific demethylase rbr-2 [Source:UniProtKB/Swiss-Prot;Acc:Q23541]
ENSG00000099917	MED15	sel-8, mdt-15	sel-8
ENSG00000167513	CDT1	cdt-1	cdt-1		CDT (S. pombe CDC10 Dependent Transcript) homolog [Source:UniProtKB/TrEMBL;Acc:Q86S68]
ENSG00000163950	SLBP	cdl-1	cdl-1		Histone RNA hairpin-binding protein [Source:UniProtKB/Swiss-Prot;Acc:Q09599]
ENSG00000148606, ENSG00000181222	POLR3A, POLR2A	rpc-1, ama-1	ama-1		DNA-directed RNA polymerase subunit [Source:UniProtKB/TrEMBL;Acc:Q18566]
ENSG00000136807	CDK9	cdk-9	cdk-9		Probable cyclin-dependent kinase 9 [Source:UniProtKB/Swiss-Prot;Acc:Q9TVL3]
ENSG00000214255, ENSG00000228981, ENSG00000196183, ENSG00000197149, ENSG00000140988	RPS2P6, RPS2P4, RP11-364L4.1, RP11-452G18.2, RPS2	rps-2	rps-2		40S ribosomal protein S2 [Source:UniProtKB/Swiss-Prot;Acc:P51403]
ENSG00000101361, ENSG00000235796	NOP56	K07C5.4	K07C5.4		Uncharacterized NOP5 family protein K07C5.4 [Source:UniProtKB/Swiss-Prot;Acc:Q21276]
ENSG00000150961, ENSG00000176986	SEC24D, SEC24C	sec-24.1	sec-24.1		Yeast SEC homolog [Source:UniProtKB/TrEMBL;Acc:Q19371]
ENSG00000132964, ENSG00000155111	CDK8, CDK19	cdk-8	cdk-8		Cyclin-dependent kinase 8 [Source:UniProtKB/Swiss-Prot;Acc:P90866]
ENSG00000135250, ENSG00000096063, ENSG00000184343	SRPK1, SRPK3, SRPK2	spk-1	spk-1		Serine/threonine-protein kinase spk-1 [Source:UniProtKB/Swiss-Prot;Acc:Q03563]
ENSG00000164162	ANAPC10	apc-10, Y48G1C.12	Y48G1C.12		Anaphase-promoting complex subunit 10 [Source:UniProtKB/Swiss-Prot;Acc:H2L2B8]
ENSG00000123728, ENSG00000181467, ENSG00000125249	RAP2B, RAP2C, RAP2A	rap-2	rap-2		RAP homolog (Vertebrate Rap GTPase family) [Source:UniProtKB/TrEMBL;Acc:O17599]
ENSG00000110367, ENSG00000269612	DDX6	cgh-1	cgh-1	DDX6	ATP-dependent RNA helicase cgh-1 [Source:UniProtKB/Swiss-Prot;Acc:Q95YF3]
ENSG00000185379, ENSG00000051180, ENSG00000100206, ENSG00000182185, ENSG00000108384	RAD51B, DMC1, RAD51C, RAD51D, RAD51	rad-51	rad-51		RAD51 short isoform; RecA/Rad51/Dmc1-like protein [Source:UniProtKB/TrEMBL;Acc:G5EGG8]
ENSG00000144366	GULP1	ced-6	ced-6		Cell death protein 6 [Source:UniProtKB/Swiss-Prot;Acc:O76337]
ENSG00000129187	DCTD	ZK643.2	ZK643.2		Probable deoxycytidylate deaminase [Source:UniProtKB/Swiss-Prot;Acc:P30648]
ENSG00000226400, ENSG00000090372, ENSG00000196792, ENSG00000115808	STRN4, STRN, CTD-2269E23.2, STRN3	cash-1	cash-1	STRN4	CKA And Striatin Homolog [Source:UniProtKB/TrEMBL;Acc:G5EE12]
ENSG00000175115, ENSG00000179364	PACS1, PACS2	tag-232	tag-232
ENSG00000204310, ENSG00000226467, ENSG00000169692, ENSG00000206324, ENSG00000235758, ENSG00000227642, ENSG00000236873, ENSG00000228892, ENSG00000206255	AGPAT2, AGPAT1	acl-2, acl-1	acl-2		Putative 1-acyl-sn-glycerol-3-phosphate acyltransferase acl-2 [Source:UniProtKB/Swiss-Prot;Acc:Q22267]
ENSG00000069188, ENSG00000146555	SDK2, SDK1	rig-4	rig-4		Protein sidekick homolog [Source:UniProtKB/Swiss-Prot;Acc:Q9N3X8]
ENSG00000110711, ENSG00000129221	AIP, AIPL1	C56C10.10	C56C10.10
ENSG00000012983, ENSG00000011566, ENSG00000104814, ENSG00000168067	MAP4K3, MAP4K2, MAP4K5, MAP4K1	gck-2	gck-2	MAP4K3	Mitogen-activated protein kinase kinase kinase kinase [Source:UniProtKB/TrEMBL;Acc:Q23290]
ENSG00000172432, ENSG00000100226	GTPBP2, GTPBP1	cgp-1, T04H1.2	cgp-1		GTP-binding protein cgp-1 [Source:UniProtKB/Swiss-Prot;Acc:Q18905]
ENSG00000177954, ENSG00000227081, ENSG00000185088	RP11-543P15.1, RPS27L, RPS27	rps-27	rps-27		40S ribosomal protein S27 [Source:UniProtKB/Swiss-Prot;Acc:Q9TXP0]
ENSG00000131873, ENSG00000198108	CHSY1, CHSY3	sqv-5	sqv-5	CHSY1	Chondroitin sulfate synthase sqv-5 [Source:UniProtKB/Swiss-Prot;Acc:Q7Z1Z1]
ENSG00000140350, ENSG00000136938, ENSG00000143401, ENSG00000214619, ENSG00000139223, ENSG00000265346, ENSG00000184701	ANP32A, ANP32E, ANP32B, ANP32D	T19H12.2, F33H2.3	T19H12.2	ANP32A	Acidic leucine-rich nuclear phosphoprotein 32-related protein 2 [Source:UniProtKB/Swiss-Prot;Acc:O01615]
ENSG00000133247, ENSG00000110066	SUV420H1, SUV420H2	set-4	set-4		Histone-lysine N-methyltransferase Suv4-20 [Source:UniProtKB/Swiss-Prot;Acc:Q09265]
ENSG00000177084	POLE	F33H2.5	F33H2.5
ENSG00000101224, ENSG00000158402, ENSG00000164045	CDC25A, CDC25B, CDC25C	cdc-25.1, cdc-25.3, cdc-25.4, cdc-25.2	cdc-25.1		M-phase inducer phosphatase cdc-25.1 [Source:UniProtKB/Swiss-Prot;Acc:O44552]
ENSG00000220474, ENSG00000182327, ENSG00000224051	CPTP, GLTPD2	K08E4.2, tag-296, F49D11.10	tag-296
ENSG00000165527	ARF6	arf-6	arf-6		ADP-Ribosylation Factor related [Source:UniProtKB/TrEMBL;Acc:Q9U2S4]
ENSG00000047410	TPR	npp-21, syp-1	syp-1		Nuclear Pore complex Protein [Source:UniProtKB/TrEMBL;Acc:Q5WRT9]
ENSG00000144580	RQCD1	ntl-9	ntl-9		NOT-Like (Yeast CCR4/NOT complex component) [Source:UniProtKB/TrEMBL;Acc:Q18224]
ENSG00000094804, ENSG00000085840	CDC6, ORC1	cdc-6, orc-1	cdc-6		Cell Division Cycle related [Source:UniProtKB/TrEMBL;Acc:P91155]
ENSG00000180198, SNHG3-RCC1	RCC1	ran-3	ran-3		Regulator of chromosome condensation [Source:UniProtKB/Swiss-Prot;Acc:Q18211]
ENSG00000112212, ENSG00000100300	TSPO2, TSPO	C41G7.9	C41G7.9
ENSG00000131747, ENSG00000077097	TOP2A, TOP2B	R05D3.12, top-2, cin-4	top-2		Putative DNA topoisomerase 2, mitochondrial [Source:UniProtKB/Swiss-Prot;Acc:P34534]
ENSG00000106771	TMEM245	M01F1.4	M01F1.4
ENSG00000089685	BIRC5	bir-1, bir-2	bir-1		BIR (Baculovirus inhibitory repeat) family; Inhibitor of apoptosis homolog [Source:UniProtKB/TrEMBL;Acc:G5EFA2]
ENSG00000099246	RAB18	rab-18	rab-18	RAB18	Ras-related protein Rab-18 [Source:UniProtKB/Swiss-Prot;Acc:Q8MXS1]
ENSG00000182150, ENSG00000085999, ENSG00000197275	ERCC6L2, RAD54L, RAD54B	rad-54, Y116A8C.13	rad-54
ENSG00000167771, ENSG00000117625, ENSG00000089902	RCOR1, RCOR3, RCOR2	spr-1, Y74C9A.4	spr-1		REST corepressor spr-1 [Source:UniProtKB/Swiss-Prot;Acc:Q18919]

## Sheet: FBF SP 25° vs Hafner
Human ENSG	Human gene symbol	Worm public name	FBF targets (Worm public name)	PUM targets (Human gene symbol)	Gene description
ENSG00000186281, ENSG00000119927	GPAT2, GPAM	acl-6	acl-6		Probable glycerol-3-phosphate acyltransferase, mitochondrial [Source:UniProtKB/Swiss-Prot;Acc:Q22949]
ENSG00000110171, ENSG00000109654	TRIM2, TRIM3	ncl-1, nhl-1	ncl-1	TRIM2	B-box type zinc finger protein ncl-1 [Source:UniProtKB/Swiss-Prot;Acc:P34611]
ENSG00000130313	PGLS	Y57G11C.3	Y57G11C.3		Putative 6-phosphogluconolactonase [Source:UniProtKB/Swiss-Prot;Acc:O18229]
ENSG00000143256	PFDN2	pfd-2	pfd-2		Prefoldin subunit 2 [Source:UniProtKB/Swiss-Prot;Acc:Q9N5M2]
ENSG00000169895	SYAP1	C16C2.4	C16C2.4
ENSG00000186501	TMEM222	H20J04.6	H20J04.6
ENSG00000173137, ENSG00000063761	ADCK1, ADCK5	D2023.6	D2023.6
ENSG00000124370	MCEE	mce-1	mce-1	MCEE	Methylmalonyl-CoA Epimerase; Mitochondrial methylmalonyl-CoA epimerase [Source:UniProtKB/TrEMBL;Acc:G5EEG4]
ENSG00000139211, ENSG00000179715, ENSG00000132635	PCED1B, PCED1A, AMIGO2	D2030.8	D2030.8
ENSG00000131773, ENSG00000112232, ENSG00000121774	KHDRBS2, KHDRBS3, KHDRBS1	Y69A2AR.32, B0280.17, Y57G11C.36, K07H8.9	Y69A2AR.32, Y57G11C.36, K07H8.9
ENSG00000155265, ENSG00000147533	GOLGA7B, GOLGA7	Y57G11C.33	Y57G11C.33
ENSG00000080986	NDC80	ndc-80	ndc-80	NDC80	Kinetochore protein ndc-80 [Source:UniProtKB/Swiss-Prot;Acc:Q17635]
ENSG00000009335	UBE3C	D2085.4	D2085.4	UBE3C
ENSG00000198060	MARCH5	D2089.2, M110.3	M110.3
ENSG00000146373	RNF217	Y57A10A.31	Y57A10A.31
ENSG00000030066	NUP160	npp-6	npp-6	NUP160	Nuclear Pore complex Protein [Source:UniProtKB/TrEMBL;Acc:Q8T8M4]
ENSG00000120685, ENSG00000124789	NUP153, PROSER1	npp-7	npp-7		Nuclear Pore complex Protein [Source:UniProtKB/TrEMBL;Acc:P91457]
ENSG00000099940	SNAP29	snap-29	snap-29		Soluble NSF attachment protein 29 [Source:UniProtKB/Swiss-Prot;Acc:P83351]
ENSG00000134697	GNL2	ngp-1	ngp-1		Nucleolar GTP-binding protein 2 [Source:UniProtKB/TrEMBL;Acc:Q9U365]
ENSG00000198604	BAZ1A	athp-2	athp-2		AT Hook plus PHD finger transcription factor [Source:UniProtKB/TrEMBL;Acc:Q9N5L9]
ENSG00000165794, ENSG00000141873, ENSG00000143570	SLC39A1, SLC39A3, SLC39A2	F30B5.7, C06G8.3, F55F8.9, F31C3.4, Y54G9A.4	F31C3.4, F55F8.9
ENSG00000198963, ENSG00000069667, ENSG00000143365	RORB, RORA, RORC	nhr-23	nhr-23		Nuclear hormone receptor family member nhr-23 [Source:UniProtKB/Swiss-Prot;Acc:P41828]
ENSG00000069248	NUP133	npp-15	npp-15		Nuclear pore complex protein 15 [Source:UniProtKB/Swiss-Prot;Acc:P34343]
ENSG00000135213, ENSG00000158553, ENSG00000126883, ENSG00000196313	POM121, POM121L2, NUP214	npp-14	npp-14		Nuclear pore complex protein 14 [Source:UniProtKB/Swiss-Prot;Acc:Q17602]
ENSG00000117748, ENSG00000204086	RPA4, RPA2	rpa-4, rpa-2	rpa-2		Replication Protein A homolog [Source:UniProtKB/TrEMBL;Acc:Q8I7G2]
ENSG00000132182, ENSG00000198284, ENSG00000143552	NUP210P1, NUP210, NUP210L	npp-12	npp-12		Nuclear Pore complex Protein [Source:UniProtKB/TrEMBL;Acc:P91495]
ENSG00000110713, ENSG00000213024	NUP62, NUP98	npp-11, npp-10	npp-10	NUP98	Nuclear Pore complex Protein [Source:UniProtKB/TrEMBL;Acc:O01576]
ENSG00000187627, ENSG00000183054, ENSG00000015568, ENSG00000185304, ENSG00000169629, ENSG00000099901, ENSG00000153165, ENSG00000153201, ENSG00000196862	RGPD2, RGPD4, RGPD6, RANBP2, RANBP1, RGPD5, RGPD3, RGPD1, RGPD8	npp-9	npp-9	RANBP2	Nuclear Pore complex Protein [Source:UniProtKB/TrEMBL;Acc:Q21021]
ENSG00000140521	POLG	polg-1	polg-1		POLG (Mitochondrial DNA POLymerase Gamma) [Source:UniProtKB/TrEMBL;Acc:Q9U208]
ENSG00000155561	NUP205	npp-3	npp-3	NUP205	Nuclear Pore complex Protein [Source:UniProtKB/TrEMBL;Acc:Q21436]
ENSG00000166986, ENSG00000152428, ENSG00000247626	MARS2, MARS	mars-1, Y105E8A.20	mars-1		Methionine--tRNA ligase, cytoplasmic [Source:UniProtKB/Swiss-Prot;Acc:Q20970]
ENSG00000141084, ENSG00000010017, ENSG00000167778	RANBP9, RANBP10, SPRYD3	Y54E5A.7	Y54E5A.7
ENSG00000099977, ENSG00000099974	DDT, DDTL	mif-2, mif-3	mif-3		MIF-like protein mif-2 [Source:UniProtKB/Swiss-Prot;Acc:Q18785]
ENSG00000138750	NUP54	npp-1	npp-1	NUP54	Nuclear Pore complex Protein [Source:UniProtKB/TrEMBL;Acc:Q9U3B9]
ENSG00000096401	CDC5L	D1081.8	D1081.8
ENSG00000198692, ENSG00000173674	EIF1AY, EIF1AX	eif-1.A	eif-1.A	EIF1AX	Eukaryotic Initiation Factor [Source:UniProtKB/TrEMBL;Acc:Q9TXU7]
ENSG00000085449, ENSG00000139668	WDFY2, WDFY1	wdfy-2	wdfy-2	WDFY1	WD repeat and FYVE domain-containing protein 2 [Source:UniProtKB/Swiss-Prot;Acc:Q18964]
ENSG00000167985	SDHAF2	Y57A10A.29	Y57A10A.29		Succinate dehydrogenase assembly factor 2, mitochondrial [Source:UniProtKB/Swiss-Prot;Acc:Q9NA72]
ENSG00000187609	EXD3	ZK1098.3, Y57A10A.13, mut-7	Y57A10A.13, mut-7
ENSG00000107951, ENSG00000149016	MTPAP, TUT1	mut-2	mut-2		MUTator [Source:UniProtKB/TrEMBL;Acc:Q8IA66]
ENSG00000119487	MAPKAP1	sinh-1	sinh-1		Stress-activated map kinase-interacting protein 1 homolog [Source:UniProtKB/Swiss-Prot;Acc:Q9NA80]
ENSG00000147144, ENSG00000151474, ENSG00000114541, ENSG00000163362	FRMD4B, CCDC120, C1orf106, FRMD4A	F07C6.4	F07C6.4	FRMD4B
ENSG00000188833, ENSG00000138185, ENSG00000168032, ENSG00000198018, ENSG00000054179, ENSG00000197217	ENTPD7, ENTPD4, ENTPD8, ENTPD3, ENTPD1, ENTPD2	mig-23, ntp-1	ntp-1	ENTPD7	Nucleoside-diphosphatase mig-23 [Source:UniProtKB/Swiss-Prot;Acc:Q21815]
ENSG00000080007, ENSG00000184735	DDX53, DDX43	Y54G11A.3	Y54G11A.3
ENSG00000183496, ENSG00000181588, ENSG00000176624	MEX3B, MEX3C, MEX3D	mex-3	mex-3		Muscle EXcess [Source:UniProtKB/TrEMBL;Acc:V6CKQ3]
ENSG00000102575	ACP5	F02E9.7	F02E9.7
ENSG00000139496	NUP58	npp-4	npp-4		Nuclear Pore complex Protein [Source:UniProtKB/TrEMBL;Acc:Q9XWK3]
ENSG00000109685, ENSG00000147548, ENSG00000165671	WHSC1, WHSC1L1, NSD1	mes-4	mes-4	WHSC1	Histone-lysine N-methyltransferase mes-4 [Source:UniProtKB/Swiss-Prot;Acc:Q9NH52]
ENSG00000144228, ENSG00000121067	SPOPL, SPOP	bath-43, bath-44, mel-26	bath-44		BTB and MATH domain-containing protein 43 [Source:UniProtKB/Swiss-Prot;Acc:P34568]
ENSG00000115073, ENSG00000138107	ACTR1A, ACTR1B	arp-1	arp-1	ACTR1B	Actin-Related Proteins [Source:UniProtKB/TrEMBL;Acc:Q9NA98]
ENSG00000136051	KIAA1033	Y53F4B.21	Y53F4B.21
ENSG00000198826	ARHGAP11A	rga-3, rga-4	rga-3, rga-4		Rho GTPase Activating protein [Source:UniProtKB/TrEMBL;Acc:O01585]
ENSG00000102781, ENSG00000186625	KATNAL1, KATNA1	mei-1	mei-1	KATNAL1	Meiotic spindle formation protein mei-1 [Source:UniProtKB/Swiss-Prot;Acc:P34808]
ENSG00000062822	POLD1	F10C2.4	F10C2.4		DNA polymerase delta catalytic subunit [Source:UniProtKB/Swiss-Prot;Acc:P90829]
ENSG00000165591	FAAH2	Y53F4B.18	Y53F4B.18
ENSG00000137200	CMTR1	Y53F4B.13	Y53F4B.13		Cap-specific mRNA (nucleoside-2'-O-)-methyltransferase 1 [Source:UniProtKB/Swiss-Prot;Acc:Q9NAA5]
ENSG00000130165	ELOF1	Y54G11A.11	Y54G11A.11		Transcription elongation factor 1 homolog [Source:UniProtKB/Swiss-Prot;Acc:Q9XVZ8]
ENSG00000146005, ENSG00000125637, ENSG00000156011, ENSG00000059915	PSD4, PSD2, PSD, PSD3	efa-6	efa-6	PSD3	Exchange factor for Arf-6 [Source:UniProtKB/Swiss-Prot;Acc:G5EET6]
ENSG00000165416	SUGT1	D1054.3	D1054.3	SUGT1
ENSG00000063601, ENSG00000269031, ENSG00000171100, ENSG00000087053	MTM1, MTMR2, MTMR1	mtm-1	mtm-1	MTM1, MTMR1	Myotubularin-related protein 1 [Source:UniProtKB/Swiss-Prot;Acc:Q9N589]
ENSG00000162604	TM2D1	Y66D12A.21	Y66D12A.21		TM2 domain-containing protein Y66D12A.21 [Source:UniProtKB/Swiss-Prot;Acc:Q95PJ8]
ENSG00000133195	SLC39A11	F59A3.4	F59A3.4
ENSG00000157020	SEC13	npp-20	npp-20		Protein SEC13 homolog [Source:UniProtKB/Swiss-Prot;Acc:Q9N4A7]
ENSG00000113318, ENSG00000116062	MSH3, MSH6	msh-6	msh-6	MSH3	MSH (MutS Homolog) family [Source:UniProtKB/TrEMBL;Acc:Q9N3T8]
ENSG00000230961, ENSG00000230293, ENSG00000237333, ENSG00000096474, ENSG00000235222, ENSG00000233345, ENSG00000204410, ENSG00000235569, ENSG00000227314	MSH5	msh-5	msh-5		MutS protein homolog 5 [Source:UniProtKB/Swiss-Prot;Acc:Q19272]
ENSG00000095002	MSH2	msh-2	msh-2	MSH2	MSH (MutS Homolog) family [Source:UniProtKB/TrEMBL;Acc:Q9TXR4]
ENSG00000123562, ENSG00000185787	MORF4L2, MORF4L1	mrg-1	mrg-1	MORF4L2	MRG (Mortality factor-Related Gene) related [Source:UniProtKB/TrEMBL;Acc:Q9XWW2]
ENSG00000128016, ENSG00000185650, ENSG00000152518	ZFP36L1, ZFP36, ZFP36L2	oma-2, moe-3, oma-1, ccch-1	oma-1	ZFP36L1, ZFP36L2	CCCH-type zinc finger protein oma-2 [Source:UniProtKB/Swiss-Prot;Acc:Q23359]
ENSG00000020922	MRE11A	mre-11	mre-11		Double-strand break repair protein mre-11 [Source:UniProtKB/Swiss-Prot;Acc:Q23255]
ENSG00000132382	MYBBP1A	K04C2.2	K04C2.2
ENSG00000102882, ENSG00000100030, ENSG00000166484	MAPK7, MAPK1, MAPK3	F09C12.2, mpk-1, mpk-2	mpk-1	MAPK1	Mitogen-activated protein kinase [Source:UniProtKB/TrEMBL;Acc:Q19243]
ENSG00000135341	MAP3K7	Y105C5A.24, mom-4	mom-4
ENSG00000135925, ENSG00000143816, ENSG00000158955, ENSG00000169884	WNT9A, WNT10B, WNT10A, WNT9B	mom-2	mom-2
ENSG00000144158, ENSG00000131876	SNRPA1, RP11-395L14.17	mog-2	mog-2	SNRPA1	Probable U2 small nuclear ribonucleoprotein A' [Source:UniProtKB/Swiss-Prot;Acc:Q9BLB6]
ENSG00000137513, ENSG00000134440	NARS2, NARS	nars-2, nars-1	nars-1	NARS	Asparaginyl(N) Amino-acyl tRNA Synthetase [Source:UniProtKB/TrEMBL;Acc:Q95PZ8]
ENSG00000058729	RIOK2	riok-2	riok-2	RIOK2	Serine/threonine-protein kinase RIO2 [Source:UniProtKB/Swiss-Prot;Acc:Q95Q34]
ENSG00000138382	METTL5	C38D4.9	C38D4.9
ENSG00000178028	DMAP1	ekl-4	ekl-4
ENSG00000188985, ENSG00000178700, ENSG00000228716	DHFRL1, DHFR, DHFRP1	dhfr-1	dhfr-1		Putative dihydrofolate reductase [Source:UniProtKB/Swiss-Prot;Acc:Q93341]
ENSG00000166851, ENSG00000145632, ENSG00000237810, ENSG00000173846	CTD-2571E19.3, PLK2, PLK3, PLK1	plk-1, plk-3, plk-2	plk-3		Serine/threonine-protein kinase plk-1 [Source:UniProtKB/Swiss-Prot;Acc:P34331]
ENSG00000129219, ENSG00000075651	PLD2, PLD1	pld-1	pld-1		PhosphoLipase D; Phospholipase D [Source:UniProtKB/TrEMBL;Acc:G5EDU3]
ENSG00000161714, ENSG00000139151, ENSG00000115556, ENSG00000187091, ENSG00000248833	PLCZ1, PLCD3, PLCD4, PLCD1	plc-4	plc-4		Phosphoinositide phospholipase C [Source:UniProtKB/TrEMBL;Acc:Q21754]
ENSG00000205544	TMEM256	Y106G6H.8	Y106G6H.8
ENSG00000090857, ENSG00000214331	PDPR, RP11-252A24.2	Y106G6H.5	Y106G6H.5
ENSG00000163558, ENSG00000067606	PRKCZ, PRKCI	pkc-3	pkc-3		Protein kinase C-like 3 [Source:UniProtKB/Swiss-Prot;Acc:Q19266]
ENSG00000137337, ENSG00000157212	MDC1, PAXIP1	pis-1	pis-1		PIS (Pax-2, IA-1/6, Smad-2 interacting protein) homolog [Source:UniProtKB/TrEMBL;Acc:Q9U370]
ENSG00000140451	PIF1	pif-1	pif-1		ATP-dependent DNA helicase PIF1 [Source:UniProtKB/TrEMBL;Acc:G5EFV7]
ENSG00000042088	TDP1	F52C12.1	F52C12.1		Probable tyrosyl-DNA phosphodiesterase [Source:UniProtKB/Swiss-Prot;Acc:Q9TXV7]
ENSG00000072954, ENSG00000095209	TMEM38A, TMEM38B	Y57A10A.28, Y57A10A.10	Y57A10A.28
ENSG00000174327, ENSG00000174326, ENSG00000168679, ENSG00000165449, ENSG00000163053	SLC16A11, SLC16A13, SLC16A9, SLC16A14, SLC16A4	C01B4.9, F10G7.5, M03B6.2, C49F8.2, T02G5.12, C10E2.6, pes-22, Y59A8B.21, Y19D10A.12	Y59A8B.21	SLC16A14
ENSG00000075336	TIMM21	F56B3.11	F56B3.11
ENSG00000102978	POLR2C	rpb-3	rpb-3		RNA Polymerase II (B) subunit [Source:UniProtKB/TrEMBL;Acc:Q93338]
ENSG00000149923	PPP4C	pph-4.1, pph-4.2	pph-4.1, pph-4.2		Serine/threonine-protein phosphatase 4 catalytic subunit 1 [Source:UniProtKB/Swiss-Prot;Acc:Q9XW79]
ENSG00000145604	SKP2	skpt-1	skpt-1		SKP2 (S phase Kinase associated Protein Two) homolog [Source:UniProtKB/TrEMBL;Acc:Q09397]
ENSG00000164050, ENSG00000130827, ENSG00000114554, ENSG00000221866, ENSG00000136040, ENSG00000198753, ENSG00000196576, ENSG00000004399, ENSG00000076356	PLXNA2, PLXNB3, PLXND1, PLXNC1, PLXNB1, PLXNB2, PLXNA1, PLXNA4, PLXNA3	plx-2, plx-1	plx-1	PLXNA2, PLXNA4, PLXNB2	Plexin-2 [Source:UniProtKB/Swiss-Prot;Acc:O45657]
ENSG00000136875	PRPF4	prp-4	prp-4		Yeast PRP (Splicing factor) related [Source:UniProtKB/TrEMBL;Acc:Q93339]
ENSG00000204764, ENSG00000130227	XPO7, RANBP17	C35A5.8	C35A5.8	XPO7
ENSG00000110917	MLEC	F44E2.10	F44E2.10
ENSG00000243244, ENSG00000242441, ENSG00000165417, ENSG00000068781, ENSG00000140022	STON1-GTF2A1L, GTF2A1, STON1, GTF2A1L, STON2	unc-41, pqn-51	pqn-51	STON1, GTF2A1L, GTF2A1	Putative stoned B-like protein [Source:UniProtKB/Swiss-Prot;Acc:P90761]
ENSG00000235254, ENSG00000155984	TMEM185AP1	Y116A8C.9	Y116A8C.9
ENSG00000184708	EIF4ENIF1	ifet-1	ifet-1	EIF4ENIF1	Translational repressor ifet-1 [Source:UniProtKB/Swiss-Prot;Acc:Q20898]
ENSG00000163683	SMIM14	C34C12.4	C34C12.4
ENSG00000185359	HGS	hgrs-1	hgrs-1		Hepatocyte Growth factor-Regulated TK Substrate (HRS) family [Source:UniProtKB/TrEMBL;Acc:Q17796]
ENSG00000198682, ENSG00000138801	PAPSS1, PAPSS2	pps-1	pps-1		3'-Phosphoadenosine 5'-Phosphosulfate Synthetase [Source:UniProtKB/TrEMBL;Acc:A0A061AE05]
ENSG00000154839	SKA1	ska-1	ska-1		Spindle and kinetochore-associated protein 1 [Source:UniProtKB/Swiss-Prot;Acc:Q9XWS0]
ENSG00000027001	MIPEP	Y67H2A.7	Y67H2A.7
ENSG00000116903	EXOC8	exoc-8	exoc-8	EXOC8	EXOCyst component [Source:UniProtKB/TrEMBL;Acc:Q7YTV2]
ENSG00000125779, ENSG00000157881, ENSG00000120137, ENSG00000152782	PANK4, PANK3, PANK2, PANK1	pnk-4, pnk-1	pnk-1	PANK4, PANK3, PANK1	PaNtothenate Kinase [Source:UniProtKB/TrEMBL;Acc:Q18580]
ENSG00000186704, ENSG00000078319, ENSG00000123965, ENSG00000198632, ENSG00000174368, ENSG00000127957, ENSG00000122512, ENSG00000188073, ENSG00000064933	PMS1, PMS2P1, DTX2P1, PMS2P5, PMS2P3, PMS2	pms-2	pms-2		PMS (Post Meiotic Segregation) family [Source:UniProtKB/TrEMBL;Acc:G5EFG5]
ENSG00000064270, ENSG00000074370, ENSG00000017260, ENSG00000196296, ENSG00000174437	ATP2A3, ATP2C1, ATP2A2, ATP2C2, ATP2A1	pmr-1, sca-1	pmr-1	ATP2A1	Calcium-transporting ATPase [Source:UniProtKB/TrEMBL;Acc:G5EFK9]
ENSG00000197355, ENSG00000117143	UAP1, UAP1L1	C36A4.4, K06B9.2	C36A4.4		Probable UDP-N-acetylglucosamine pyrophosphorylase [Source:UniProtKB/Swiss-Prot;Acc:Q18493]
ENSG00000133313, ENSG00000150656	CNDP1, CNDP2	pes-9, Y71H2AM.11	Y71H2AM.11		Patterned Expression Site [Source:UniProtKB/TrEMBL;Acc:O18000]
ENSG00000066279	ASPM	aspm-1	aspm-1	ASPM
ENSG00000140905	GCSH	gcsh-1, F52A8.5	F52A8.5	GCSH	Glycine cleavage system H protein [Source:UniProtKB/TrEMBL;Acc:O62122]
ENSG00000170734	POLH	polh-1	polh-1	POLH	DNA polymerase eta; POLH (DNA polymerase eta) homolog [Source:UniProtKB/TrEMBL;Acc:G5EFY1]
ENSG00000183828	NUDT14	C50F4.16	C50F4.16
ENSG00000100836, ENSG00000205022	PABPN1, PABPN1L	EEED8.12, pabp-2, EEED8.4	pabp-2		Putative RNA-binding protein EEED8.12 [Source:UniProtKB/Swiss-Prot;Acc:Q09301]
ENSG00000112159	MDN1	F55F10.1	F55F10.1		Midasin [Source:UniProtKB/TrEMBL;Acc:O61851]
ENSG00000165169, ENSG00000146425	DYNLT3, DYNLT1	dylt-3, dylt-1	dylt-1	DYNLT3	DYnein Light chain (Tctex type) [Source:UniProtKB/TrEMBL;Acc:Q22226]
ENSG00000118518	RNF146	C55A6.1, Y105E8A.14, C26B9.6, C02B8.6	C55A6.1
ENSG00000144589, ENSG00000010322	NISCH, STK11IP	F13E9.1	F13E9.1
ENSG00000070610	GBA2	R08F11.1, hpo-13	hpo-13		Non-lysosomal glucosylceramidase [Source:UniProtKB/TrEMBL;Acc:O01893]
ENSG00000141499	WRAP53	Y105E8A.8	Y105E8A.8
ENSG00000092010, ENSG00000238000, ENSG00000100911, ENSG00000131467	RP11-274E7.2, PSME3, PSME2, PSME1	Y66D12A.9	Y66D12A.9
ENSG00000018610	CXorf56	Y66D12A.8	Y66D12A.8
ENSG00000101888, ENSG00000132661	NXT1, NXT2	nxt-1	nxt-1		NTF2-related export protein [Source:UniProtKB/Swiss-Prot;Acc:Q9U757]
ENSG00000134899	ERCC5	gen-1, xpg-1	gen-1		GEN1 Holliday junction resolvase homolog [Source:UniProtKB/TrEMBL;Acc:Q22418]
ENSG00000015676, ENSG00000090273	NUDC, NUDCD3	nud-1	nud-1		Aspergillus NUclear Division related; NUD-1 [Source:UniProtKB/TrEMBL;Acc:G5EE74]
ENSG00000088038, ENSG00000269595	CNOT3	ntl-3	ntl-3		NOT-Like (Yeast CCR4/NOT complex component) [Source:UniProtKB/TrEMBL;Acc:G5EFX8]
ENSG00000111596	CNOT2	ntl-2, tag-153	tag-153		NOT-Like (Yeast CCR4/NOT complex component) [Source:UniProtKB/TrEMBL;Acc:Q10923]
ENSG00000113722, ENSG00000165556, ENSG00000131264	CDX4, CDX2, CDX1	pal-1	pal-1		Homeobox protein pal-1 [Source:UniProtKB/Swiss-Prot;Acc:P34766]
ENSG00000148498, ENSG00000116117	PARD3B, PARD3	par-3	par-3		Partitioning defective protein 3 [Source:UniProtKB/Swiss-Prot;Acc:Q17353]
ENSG00000111231	GPN3	Y75B8A.14	Y75B8A.14	GPN3
ENSG00000111530, ENSG00000144712	CAND2, CAND1	cand-1	cand-1	CAND1	Cullin-associated NEDD8-dissociated protein 1 [Source:UniProtKB/Swiss-Prot;Acc:G5ED41]
ENSG00000185624, ENSG00000169340, ENSG00000185615, ENSG00000155660, ENSG00000167004	PDIA2, PDILT, P4HB, PDIA4, PDIA3	pdi-2, pdi-3, C14B9.2, pdi-1	pdi-3		Protein disulfide-isomerase 2 [Source:UniProtKB/Swiss-Prot;Acc:Q17770]
ENSG00000164109, ENSG00000184902	MAD2L1	mdf-2	mdf-2		MAD (Yeast Mitosis arrest DeFicient) related; MDF-2 [Source:UniProtKB/TrEMBL;Acc:Q9NGT3]
ENSG00000133997	MED6	mdt-6	mdt-6	MED6	Mediator of RNA polymerase II transcription subunit 6 [Source:UniProtKB/Swiss-Prot;Acc:Q9N337]
ENSG00000059758, ENSG00000117266, ENSG00000102225	CDK18, CDK17, CDK16	pct-1	pct-1		Cyclin-dependent kinase 17 [Source:UniProtKB/Swiss-Prot;Acc:Q8I7M8]
ENSG00000068912	ERLEC1	Y105E8A.2	Y105E8A.2
ENSG00000132646	PCNA	pcn-1	pcn-1	PCNA	Proliferating cell nuclear antigen [Source:UniProtKB/Swiss-Prot;Acc:O02115]
ENSG00000141627	DYM	C47D12.2	C47D12.2
ENSG00000197142, ENSG00000123983, ENSG00000151726, ENSG00000068366, ENSG00000164398	ACSL1, ACSL4, ACSL6, ACSL3, ACSL5	acs-17, acs-5, acs-13, acs-4	acs-13, acs-4	ACSL4, ACSL3	Fatty Acid CoA Synthetase family [Source:UniProtKB/TrEMBL;Acc:Q18660]
ENSG00000108294		pbs-3	pbs-3		Proteasome subunit beta type-3 [Source:UniProtKB/Swiss-Prot;Acc:Q23237]
ENSG00000269645, ENSG00000071859, ENSG00000145945	FAM50A, FAM50B	C47E8.4	C47E8.4		Protein FAM50 homolog [Source:UniProtKB/Swiss-Prot;Acc:Q18691]
ENSG00000088298, ENSG00000134109	EDEM2, EDEM1	C47E12.3, F10C2.5	C47E12.3, F10C2.5		alpha-1,2-Mannosidase [Source:UniProtKB/TrEMBL;Acc:Q18679]
ENSG00000164187	LMBRD2	C47G2.4	C47G2.4		LMBR1 domain-containing protein 2 homolog [Source:UniProtKB/Swiss-Prot;Acc:Q18695]
ENSG00000143106	PSMA5	pas-5	pas-5		Proteasome subunit alpha type-5 [Source:UniProtKB/Swiss-Prot;Acc:Q95008]
ENSG00000124786	SLC35B3	pst-2	pst-2		Adenosine 3'-phospho 5'-phosphosulfate transporter 2 [Source:UniProtKB/Swiss-Prot;Acc:Q20787]
ENSG00000069020, ENSG00000099308, ENSG00000105613, ENSG00000086015	MAST4, MAST3, MAST1, MAST2	kin-4	kin-4	MAST1	KIN-4 protein; Protein KINase [Source:UniProtKB/TrEMBL;Acc:G5EFA4]
ENSG00000154556, ENSG00000147010, ENSG00000198087, ENSG00000120896, ENSG00000095637, ENSG00000214193	SH3D21, CD2AP, SORBS2, SORBS1, SH3KBP1, SORBS3	Y44E3A.4, sorb-1	Y44E3A.4	CD2AP, SORBS2, SORBS1
ENSG00000141551, ENSG00000180138, ENSG00000213923, ENSG00000113712	CSNK1D, CSNK1A1L, CSNK1A1, CSNK1E	kin-19, kin-20	kin-19, kin-20	CSNK1D, CSNK1A1, CSNK1E	Casein kinase I isoform alpha [Source:UniProtKB/Swiss-Prot;Acc:P42168]
ENSG00000113163	COL4A3BP	F25H2.6	F25H2.6
ENSG00000123643, ENSG00000186335, ENSG00000180773, ENSG00000186334	SLC36A1, SLC36A4, SLC36A2, SLC36A3	Y43F4B.7, T27A1.5	Y43F4B.7
ENSG00000178607, ENSG00000134398	ERN1, ERN2	ire-1	ire-1		Serine/threonine-protein kinase/endoribonuclease ire-1 Serine/threonine-protein kinase Endoribonuclease [Source:UniProtKB/Swiss-Prot;Acc:Q09499]
ENSG00000142207	URB1	T05H4.10	T05H4.10
ENSG00000224510, ENSG00000147669	POLR2KP2, POLR2K	rpb-12	rpb-12	POLR2K	RNA Polymerase II (B) subunit [Source:UniProtKB/TrEMBL;Acc:X5M5N4]
ENSG00000025800, ENSG00000186432, ENSG00000196911, ENSG00000114030, ENSG00000102753	KPNA3, KPNA4, KPNA5, KPNA6, KPNA1	ima-3	ima-3	KPNA5, KPNA1, KPNA4	Importin subunit alpha-3 [Source:UniProtKB/Swiss-Prot;Acc:Q19969]
ENSG00000168137, ENSG00000005483	SETD5, KMT2E	Y73B3A.1, set-9, set-26, set-24	set-9, set-26
ENSG00000176101	SSNA1	tag-261	tag-261
ENSG00000011426	ANLN	ani-1, ani-3, ani-2	ani-1, ani-2	ANLN	Anillin-like protein 1 [Source:UniProtKB/Swiss-Prot;Acc:Q9XTT4]
ENSG00000175766, ENSG00000151247	EIF4E1B, EIF4E	ife-3, ife-1, ife-5, ife-2	ife-1	EIF4E	Eukaryotic translation initiation factor 4E-3 [Source:UniProtKB/Swiss-Prot;Acc:O61955]
ENSG00000149503	INCENP	icp-1	icp-1		InCenP homolog; Incenp-like protein ICP-1 [Source:UniProtKB/TrEMBL;Acc:G5EE37]
ENSG00000182872, ENSG00000003756, ENSG00000004534	RBM10, RBM6, RBM5	T08B2.5	T08B2.5
ENSG00000139624, ENSG00000090661, ENSG00000143418, ENSG00000172292, ENSG00000154227	CERS2, CERS3, CERS5, CERS4, CERS6	hyl-1, hyl-2	hyl-1		Ceramide synthase hyl-1 [Source:UniProtKB/Swiss-Prot;Acc:G5ED45]
ENSG00000092853	CLSPN	F25H5.5	F25H5.5
ENSG00000065559	MAP2K4	ZC449.3, mkk-4, jkk-1, F35C8.1, F35C8.2, VZC374L.1, E02D9.1	E02D9.1		MAP kinase kinase mkk-4 [Source:UniProtKB/Swiss-Prot;Acc:Q20347]
ENSG00000166507, ENSG00000164100, ENSG00000138653, ENSG00000175818, ENSG00000070614	NDST2, NDST4, NDST1, NDST3	hst-1	hst-1		Bifunctional heparan sulfate N-deacetylase/N-sulfotransferase 1 Heparan sulfate N-deacetylase 1 Heparan sulfate N-sulfotransferase 1 [Source:UniProtKB/Swiss-Prot;Acc:Q966W3]
ENSG00000102038, ENSG00000153147	SMARCA1, SMARCA5	isw-1	isw-1		Chromatin-remodeling complex ATPase chain isw-1 [Source:UniProtKB/Swiss-Prot;Acc:P41877]
ENSG00000122705, ENSG00000175416	CLTB, CLTA	clic-1	clic-1		Clathrin light chain [Source:UniProtKB/TrEMBL;Acc:P90961]
ENSG00000103502	CDIPT	pisy-1	pisy-1		CDP-diacylglycerol--inositol 3-phosphatidyltransferase [Source:UniProtKB/TrEMBL;Acc:Q9U2G1]
ENSG00000189045, ENSG00000135299, ENSG00000101752, ENSG00000197530, ENSG00000166839	ANKDD1A, MIB2, ANKRD6, ANKDD1B, MIB1	mib-1	mib-1	MIB1	MIB (MIndBomb) ubiquitin ligase homolog [Source:UniProtKB/TrEMBL;Acc:Q9U2C5]
ENSG00000226650, ENSG00000090889	KIF4A, KIF4B	klp-19	klp-19		Kinesin-like protein [Source:UniProtKB/TrEMBL;Acc:O45935]
ENSG00000111684	LPCAT3	mboa-6	mboa-6		Lysophospholipid acyltransferase 5 [Source:UniProtKB/Swiss-Prot;Acc:O01925]
ENSG00000163808	KIF15	klp-10, klp-18	klp-18, klp-10
ENSG00000163749	CCDC158	C24A3.1, klp-8	klp-8
ENSG00000142945, ENSG00000141200, ENSG00000186638, ENSG00000068796	KIF24, KIF2B, KIF2A, KIF2C	klp-7	klp-7		Kinesin-like protein [Source:UniProtKB/TrEMBL;Acc:G5ED75]
ENSG00000204197, ENSG00000167702, ENSG00000140859, ENSG00000233450, ENSG00000237649	KIFC3, KIFC1, KIFC2	klp-17, klp-3, klp-16, klp-15	klp-15, klp-16	KIFC1	Kinesin-like protein [Source:UniProtKB/TrEMBL;Acc:Q23124]
ENSG00000113971	NPHP3	klc-1	klc-1		Kinesin Light Chain [Source:UniProtKB/TrEMBL;Acc:Q21592]
ENSG00000176208	ATAD5	Y53F4B.9	Y53F4B.9
ENSG00000143774	GUK1	guk-1	guk-1		GUanylate Kinase [Source:UniProtKB/TrEMBL;Acc:P91425]
ENSG00000102878, ENSG00000025156, ENSG00000185122	HSF4, HSF2, HSF1	hsf-1	hsf-1	HSF2	Heat Shock Factor; Heat shock transcription factor 1 [Source:UniProtKB/TrEMBL;Acc:G5EFT5]
ENSG00000131269, ENSG00000115657	ABCB7, ABCB6	abtm-1, hmt-1	hmt-1		ABC Transporter, Mitochondrial [Source:UniProtKB/TrEMBL;Acc:A0A061ACG9]
ENSG00000106348, ENSG00000178035	IMPDH2, IMPDH1	T22D1.3	T22D1.3		Inosine-5'-monophosphate dehydrogenase [Source:UniProtKB/Swiss-Prot;Acc:Q9GZH3]
ENSG00000039650	PNKP	F21D5.5	F21D5.5
ENSG00000071205, ENSG00000159842, ENSG00000165895, ENSG00000186716, ENSG00000145819, ENSG00000079482	BCR, ARHGAP42, ARHGAP10, ABR, ARHGAP26, OPHN1	T04C9.1	T04C9.1
ENSG00000213619	NDUFS3	nuo-2	nuo-2		NADH Ubiquinone Oxidoreductase [Source:UniProtKB/TrEMBL;Acc:Q86NC2]
ENSG00000067369	TP53BP1	hsr-9	hsr-9
ENSG00000182107, ENSG00000235156, ENSG00000112697	TMEM30B, TMEM30C, TMEM30A	F20C5.4, chat-1	chat-1	TMEM30A
ENSG00000145414	NAF1	F25H8.2	F25H8.2	NAF1
ENSG00000179085	DPM3	dpm-3	dpm-3		Probable dolichol-phosphate mannosyltransferase subunit 3 [Source:UniProtKB/Swiss-Prot;Acc:Q9XVV5]
ENSG00000171720, ENSG00000196591, ENSG00000116478	HDAC2, HDAC1, HDAC3	hda-3, hda-1	hda-1	HDAC3	Histone deacetylase [Source:UniProtKB/TrEMBL;Acc:G5ECH0]
ENSG00000151503	NCAPD3	hcp-6	hcp-6	NCAPD3	HoloCentric chromosome binding Protein [Source:UniProtKB/TrEMBL;Acc:Q95Y84]
ENSG00000172534, ENSG00000111727, ENSG00000268768	HCFC1, HCFC2	hcf-1	hcf-1	HCFC1	HCF1 related; Host cell factor 1 [Source:UniProtKB/TrEMBL;Acc:G5EC23]
ENSG00000178222	RNF212	F55A12.10, Y39B6A.16	F55A12.10, Y39B6A.16
ENSG00000169660	HEXDC	hex-5, hex-3, hex-4, hex-2	hex-4		HEXosaminidase; Hexosaminidase [Source:UniProtKB/TrEMBL;Acc:G5EEC8]
ENSG00000168818	STX18	syx-18	syx-18	STX18	SYntaXin [Source:UniProtKB/TrEMBL;Acc:O76413]
ENSG00000138604	GLCE	hse-5	hse-5	GLCE	D-glucuronyl C5-epimerase [Source:UniProtKB/Swiss-Prot;Acc:P46555]
ENSG00000068745, ENSG00000161896, ENSG00000176095	IP6K2, IP6K3, IP6K1	Y22D7AR.6, T20F7.3, F30A10.3	F30A10.3		Kinase [Source:UniProtKB/TrEMBL;Acc:Q9BKX8]
ENSG00000186298, ENSG00000213639, ENSG00000172531	PPP1CB, PPP1CA, PPP1CC	gsp-2, gsp-1	gsp-2	PPP1CB, PPP1CC	Serine/threonine-protein phosphatase PP1-beta [Source:UniProtKB/Swiss-Prot;Acc:P48727]
ENSG00000124541	RRP36	T22H9.1	T22H9.1
ENSG00000119616	FCF1	F30A10.9	F30A10.9
ENSG00000108669, ENSG00000008256, ENSG00000100055, ENSG00000105443	CYTH1, CYTH4, CYTH3, CYTH2	grp-1	grp-1	CYTH3, CYTH1	GTP exchange factor for ARFs 1 [Source:UniProtKB/Swiss-Prot;Acc:P34512]
ENSG00000126749, ENSG00000268439	RP3-461F17.3, EMG1	Y39A1A.14	Y39A1A.14		Ribosomal RNA small subunit methyltransferase nep-1 [Source:UniProtKB/Swiss-Prot;Acc:Q9XX15]
ENSG00000122390, ENSG00000121579	NAA60, NAA50	F40F4.7, F54E7.9, F30F8.10	F30F8.10
ENSG00000198563, ENSG00000229496, ENSG00000215425, ENSG00000235439, ENSG00000225073, ENSG00000225859, ENSG00000230624, ENSG00000237889, ENSG00000123136	DDX39A, DDX39B	hel-1	hel-1		Spliceosome RNA helicase DDX39B homolog [Source:UniProtKB/Swiss-Prot;Acc:Q18212]
ENSG00000188342	GTF2F2	Y39B6A.36	Y39B6A.36		General transcription factor IIF subunit 2 [Source:UniProtKB/TrEMBL;Acc:Q8MYM8]
ENSG00000189060, ENSG00000124610, ENSG00000168298, ENSG00000184357, ENSG00000178804, ENSG00000187837, ENSG00000124575, ENSG00000187475, ENSG00000184897	H1FX, HIST1H1A, H1FOO, HIST1H1B, H1F0, HIST1H1C, HIST1H1D, HIST1H1T, HIST1H1E	hil-5, hil-1, hil-6, hil-2, hil-4, hil-3, his-24	hil-5, hil-2, hil-4	H1F0	Histone H1.5 [Source:UniProtKB/Swiss-Prot;Acc:O01833]
ENSG00000114942, ENSG00000104529	EEF1D, EEF1B2	eef-1B.1, eef-1B.2	eef-1B.2		Probable elongation factor 1-beta/1-delta 1 [Source:UniProtKB/Swiss-Prot;Acc:P34460]
ENSG00000204070	SYS1	T03F1.12	T03F1.12
ENSG00000177479	ARIH2	T12E12.1	T12E12.1		Potential E3 ubiquitin-protein ligase ariadne-2 [Source:UniProtKB/Swiss-Prot;Acc:Q22431]
ENSG00000158411	MITD1	Y66D12A.10	Y66D12A.10
ENSG00000166508	MCM7	mcm-7	mcm-7		DNA helicase [Source:UniProtKB/TrEMBL;Acc:O16297]
ENSG00000064102	ASUN	R02D3.4	R02D3.4
ENSG00000143801, ENSG00000080815	PSEN1, PSEN2	spe-4, sel-12, hop-1	hop-1	PSEN1	Presenilin spe-4 [Source:UniProtKB/Swiss-Prot;Acc:Q01608]
ENSG00000149136	SSRP1	hmg-3, hmg-4	hmg-4, hmg-3		FACT complex subunit ssrp1-B [Source:UniProtKB/Swiss-Prot;Acc:O01683]
ENSG00000269384, ENSG00000077935, ENSG00000072501	SMC1B, SMC1A	him-1	him-1	SMC1B, SMC1A	Structural maintenance of chromosomes protein 1 [Source:UniProtKB/Swiss-Prot;Acc:O01789]
ENSG00000164104, ENSG00000124097, ENSG00000189403, ENSG00000029993	HMGB3, HMGB1P1, HMGB2, HMGB1	hmg-1.2	hmg-1.2	HMGB3, HMGB1, HMGB2	High mobility group protein 1.2 [Source:UniProtKB/Swiss-Prot;Acc:Q09390]
ENSG00000204518, ENSG00000197953, ENSG00000114771, ENSG00000188984, ENSG00000144959	AADACL2, NCEH1, AADACL4, AADAC, AADACL3	Y43F8A.3, trcs-1, F16F9.4, T09B9.1	trcs-1		TRansport of membrane to Cell Surface [Source:UniProtKB/TrEMBL;Acc:Q19839]
ENSG00000248098	BCKDHA	Y39E4A.3	Y39E4A.3
ENSG00000213064, ENSG00000198818	SFT2D1, SFT2D2	F27D4.7	F27D4.7	SFT2D1	Vesicle transport protein [Source:UniProtKB/TrEMBL;Acc:Q7YTP0]
ENSG00000004700, ENSG00000197299, ENSG00000165392	BLM, WRN, RECQL	him-6, wrn-1, K02F3.12	wrn-1, him-6	WRN	Bloom syndrome protein homolog [Source:UniProtKB/Swiss-Prot;Acc:O18017]
ENSG00000143452, ENSG00000176635	HORMAD2, HORMAD1	htp-1, htp-2, him-3	htp-1, htp-2, him-3		Him-Three Paralog [Source:UniProtKB/TrEMBL;Acc:Q20305]
ENSG00000126602	TRAP1	R151.7	R151.7
ENSG00000101911, ENSG00000229937, ENSG00000147224	PRPS1, PRPS1L1, PRPS2	R151.2	R151.2	PRPS1
ENSG00000101343	CRNKL1	M03F8.3	M03F8.3
ENSG00000050130	JKAMP	jamp-1	jamp-1		JAMP (JNK1-Associated Membrane Protein) homolog; Seven transmembrane protein [Source:UniProtKB/TrEMBL;Acc:G5EBX4]
ENSG00000122565, ENSG00000108468, ENSG00000094916	CBX1, CBX3, CBX5	hpl-2, hpl-1	hpl-2	CBX3	Chromo-domain protein; HP1 Like (Heterochromatin protein) [Source:UniProtKB/TrEMBL;Acc:G5EDE2]
ENSG00000130340, ENSG00000178996, ENSG00000173548	SNX18, SNX33, SNX9	lst-4	lst-4	SNX9	Sorting nexin lst-4 [Source:UniProtKB/Swiss-Prot;Acc:Q8I4E2]
ENSG00000009790, ENSG00000128596, ENSG00000163681	SLMAP, TRAF3IP3, CCDC136	M4.1	M4.1
ENSG00000144580	RQCD1	ntl-9	ntl-9	RQCD1	NOT-Like (Yeast CCR4/NOT complex component) [Source:UniProtKB/TrEMBL;Acc:Q18224]
ENSG00000158526	TSR2	Y51H4A.15	Y51H4A.15
ENSG00000130332	LSM7	lsm-7	lsm-7		LSM Sm-like protein [Source:UniProtKB/TrEMBL;Acc:Q23543]
ENSG00000164167	LSM6	lsm-6	lsm-6	LSM6	LSM Sm-like protein [Source:UniProtKB/TrEMBL;Acc:Q95XN6]
ENSG00000106355	LSM5	lsm-5	lsm-5	LSM5	LSM Sm-like protein [Source:UniProtKB/TrEMBL;Acc:O18694]
ENSG00000153487, ENSG00000168395, ENSG00000168556, ENSG00000071243, ENSG00000111653	ING4, ING1, ING2, ING5, ING3	lsy-13, ing-3	ing-3	ING5, ING3
ENSG00000175324	LSM1	lsm-1	lsm-1	LSM1	LSM Sm-like protein [Source:UniProtKB/TrEMBL;Acc:Q20229]
ENSG00000011376	LARS2	lars-2	lars-2		Leucyl Amino-acyl tRNA Synthetase [Source:UniProtKB/TrEMBL;Acc:Q23511]
ENSG00000161395	PGAP3	R01B10.4	R01B10.4
ENSG00000100410	PHF5A	phf-5	phf-5		PHF-5; PHd Finger family [Source:UniProtKB/TrEMBL;Acc:G5EBY6]
ENSG00000188917, ENSG00000099899	TRMT2B, TRMT2A	H24K24.4	H24K24.4
ENSG00000032444, ENSG00000130653	PNPLA6, PNPLA7	M110.7, ZK370.4	ZK370.4		Uncharacterized NTE family protein M110.7 [Source:UniProtKB/Swiss-Prot;Acc:Q21534]
ENSG00000129933	MAU2	mau-2	mau-2		Maternal uncoordinated protein 2 [Source:UniProtKB/Swiss-Prot;Acc:O17581]
ENSG00000060566, ENSG00000107175, ENSG00000143578	CREB3L4, CREB3L3, CREB3	let-607	let-607
ENSG00000117899	MESDC2	srg-69, bmy-1	bmy-1		Serpentine receptor class gamma-69 [Source:UniProtKB/Swiss-Prot;Acc:Q19258]
ENSG00000076003	MCM6	mcm-6	mcm-6		DNA replication licensing factor mcm-6 [Source:UniProtKB/Swiss-Prot;Acc:P34647]
ENSG00000112118	MCM3	mcm-3	mcm-3		DNA helicase [Source:UniProtKB/TrEMBL;Acc:Q9XVR7]
ENSG00000180628, ENSG00000056661, ENSG00000185619, ENSG00000168283, ENSG00000156374, ENSG00000115289	BMI1, PCGF6, PCGF1, PCGF5, PCGF3	mig-32	mig-32	BMI1, PCGF6, PCGF5, PCGF3
ENSG00000124299, ENSG00000196236	XPNPEP3, PEPD	K12C11.1, R119.2	K12C11.1
ENSG00000135932, ENSG00000102547	CAB39, CAB39L	mop-25.2, mop-25.1	mop-25.2	CAB39	MO25-like protein 2 [Source:UniProtKB/Swiss-Prot;Acc:O18211]
ENSG00000149269, ENSG00000077264, ENSG00000180370	PAK2, PAK3, PAK1	max-2, pak-1	max-2	PAK3	Serine/threonine-protein kinase max-2 [Source:UniProtKB/Swiss-Prot;Acc:G5EGQ3]
ENSG00000214730, ENSG00000111196, ENSG00000162385	MAGOH, MAGOHB	mag-1	mag-1		Protein mago nashi homolog [Source:UniProtKB/Swiss-Prot;Acc:P49029]
ENSG00000189077, ENSG00000188735	TMEM120A, TMEM120B	M01G5.3	M01G5.3
ENSG00000129128	SPCS3	K12H4.4	K12H4.4	SPCS3	Probable signal peptidase complex subunit 3 [Source:UniProtKB/Swiss-Prot;Acc:P34525]
ENSG00000137207	YIPF3	Y53C12A.3	Y53C12A.3
ENSG00000153107	ANAPC1	mat-2	mat-2		Anaphase-promoting complex subunit 1 [Source:UniProtKB/Swiss-Prot;Acc:O18191]
ENSG00000198554	WDHD1	F17C11.10	F17C11.10	WDHD1
ENSG00000004897	CDC27	mat-1	mat-1		Cell division cycle protein 27 homolog [Source:UniProtKB/Swiss-Prot;Acc:Q9N593]
ENSG00000132792	CTNNBL1	M01E11.2	M01E11.2
ENSG00000110768	GTF2H1	R02D3.3	R02D3.3
ENSG00000129460	NGDN	lpd-2	lpd-2	NGDN	LiPid Depleted [Source:UniProtKB/TrEMBL;Acc:Q8IG68]
ENSG00000138709, ENSG00000155506	LARP1, LARP1B	larp-1	larp-1	LARP1	La-related protein 1 [Source:UniProtKB/Swiss-Prot;Acc:D5MCN2]
ENSG00000168522	FNTA	fnta-1	fnta-1		FarNesylTransferase, Alpha subunit [Source:UniProtKB/TrEMBL;Acc:O44501]
ENSG00000145782	ATG12	lgg-3	lgg-3		Ubiquitin-like protein ATG12 [Source:UniProtKB/TrEMBL;Acc:Q10931]
ENSG00000062650	WAPL	wapl-1	wapl-1		Wings apart-like protein homolog 1 [Source:UniProtKB/Swiss-Prot;Acc:H2L0H5]
ENSG00000159579, ENSG00000164068	RSPRY1, RNF123	F16A11.1	F16A11.1
ENSG00000114125	RNF7	rbx-2	rbx-2		Yeast RBX (Ring finger protein) homolog [Source:UniProtKB/TrEMBL;Acc:P91404]
ENSG00000004455	AK2	let-754	let-754	AK2	Adenylate kinase [Source:UniProtKB/Swiss-Prot;Acc:P34346]
ENSG00000125107	CNOT1	let-711	let-711		NTL-1a [Source:UniProtKB/TrEMBL;Acc:Q20937]
ENSG00000067900, ENSG00000134318	ROCK2, ROCK1	let-502	let-502	ROCK1	Rho-associated protein kinase let-502 [Source:UniProtKB/Swiss-Prot;Acc:P92199]
ENSG00000094975	SUCO	R12E2.2	R12E2.2
ENSG00000104738	MCM4	mcm-4	mcm-4	MCM4	DNA replication licensing factor mcm-4 [Source:UniProtKB/Swiss-Prot;Acc:Q95XQ8]
ENSG00000152217, ENSG00000181555, ENSG00000152455, ENSG00000101945, ENSG00000116539	SETBP1, SETD2, SUV39H1, SUV39H2, ASH1L	met-1, lin-59, set-12, set-25	met-1	ASH1L, SETD2	Histone-lysine N-methyltransferase [Source:UniProtKB/TrEMBL;Acc:A4LBC3]
ENSG00000132749, ENSG00000189308	LIN54, MTL5	lin-54	lin-54	LIN54
ENSG00000110786, ENSG00000143851, ENSG00000153233	PTPN7, PTPRR, PTPN5	egg-5, egg-4	egg-4		EGG sterile (Unfertilizable) [Source:UniProtKB/TrEMBL;Acc:O61789]
ENSG00000160117	ANKLE1	lem-3	lem-3		Ankyrin repeat and LEM domain-containing protein 1 homolog [Source:UniProtKB/Swiss-Prot;Acc:G5EGA3]
ENSG00000174106, ENSG00000161904	LEMD3, LEMD2	lem-2	lem-2	LEMD3	LEM protein 2 [Source:UniProtKB/Swiss-Prot;Acc:Q9XTB5]
ENSG00000136891	TEX10	Y48A6C.4	Y48A6C.4
ENSG00000145912	NHP2	Y48A6B.3	Y48A6B.3		Putative H/ACA ribonucleoprotein complex subunit 2-like protein [Source:UniProtKB/Swiss-Prot;Acc:Q9XXD4]
ENSG00000105486	LIG1	lig-1	lig-1		DNA ligase 1 [Source:UniProtKB/Swiss-Prot;Acc:Q27474]
ENSG00000174405	LIG4	lig-4	lig-4	LIG4	LIGase [Source:UniProtKB/TrEMBL;Acc:Q95YE6]
ENSG00000176894, ENSG00000247077	PGAM5, PXMP2	pgam-5	pgam-5		Serine/threonine-protein phosphatase Pgam5, mitochondrial [Source:UniProtKB/Swiss-Prot;Acc:Q09422]
ENSG00000167862	ICT1	R02F2.9	R02F2.9
ENSG00000130829, ENSG00000112679, ENSG00000184545, ENSG00000143507, ENSG00000139318, ENSG00000111266, ENSG00000149599, ENSG00000164086	DUSP15, DUSP7, DUSP22, DUSP8, DUSP6, DUSP16, DUSP10, DUSP9	F13D11.3, lip-1, C16A3.2, vhp-1	lip-1, C16A3.2	DUSP8, DUSP16
ENSG00000100395, ENSG00000163935, ENSG00000198879, ENSG00000011258	MBTD1, SFMBT2, L3MBTL2, SFMBT1	mbtr-1, lin-61	mbtr-1, lin-61	SFMBT2	Malignant brain tumor repeat protein 1 [Source:UniProtKB/Swiss-Prot;Acc:A0SQM0]
ENSG00000162521, ENSG00000102054	RBBP4, RBBP7	rba-1, lin-53	rba-1	RBBP7	Probable histone-binding protein rba-1 [Source:UniProtKB/Swiss-Prot;Acc:P90917]
ENSG00000197181, ENSG00000134627, ENSG00000125207, ENSG00000184571	PIWIL2, PIWIL3, PIWIL4, PIWIL1	prg-1, prg-2	prg-1, prg-2		Piwi-like protein [Source:UniProtKB/TrEMBL;Acc:P90786]
ENSG00000264806, ENSG00000186141	POLR3C	C48E7.2	C48E7.2
ENSG00000096070, ENSG00000100425, ENSG00000156983	BRPF1, BRD1, BRPF3	lin-49	lin-49	BRD1, BRPF3
ENSG00000157764, ENSG00000132155, ENSG00000078061	ARAF, BRAF, RAF1	lin-45	lin-45	ARAF, BRAF	Raf homolog serine/threonine-protein kinase [Source:UniProtKB/Swiss-Prot;Acc:Q07292]
ENSG00000143919, ENSG00000087884	AAMDC, CAMKMT	Y48E1C.1	Y48E1C.1
ENSG00000206557	TRIM71	lin-41	lin-41
ENSG00000182504	CEP97	R02F11.4	R02F11.4
ENSG00000177058	SLC38A9	F13H10.3	F13H10.3		Sodium-coupled neutral amino acid transporter 9 homolog [Source:UniProtKB/Swiss-Prot;Acc:Q19425]
ENSG00000105983, ENSG00000139636	LMBR1, LMBR1L	R05D3.2	R05D3.2	LMBR1	LIMR family protein R05D3.2 [Source:UniProtKB/Swiss-Prot;Acc:P34535]
ENSG00000072803, ENSG00000166167	BTRC, FBXW11	lin-23	lin-23	FBXW11	F-box/WD repeat-containing protein lin-23 [Source:UniProtKB/Swiss-Prot;Acc:Q09990]
ENSG00000139684	ESD	Y48G10A.1	Y48G10A.1	ESD	S-formylglutathione hydrolase [Source:UniProtKB/TrEMBL;Acc:G5EF86]
ENSG00000161813, ENSG00000107929	LARP4B, LARP4	larp-5	larp-5	LARP4	LARP (RNA binding La related protein) homolog [Source:UniProtKB/TrEMBL;Acc:O44760]
ENSG00000164190	NIPBL	pqn-85	pqn-85		Nipped-B-like protein pqn-85 [Source:UniProtKB/Swiss-Prot;Acc:Q95XZ5]
ENSG00000176102	CSTF3	suf-1	suf-1		SUppressor-of-Forked (Drosophila) homolog [Source:UniProtKB/TrEMBL;Acc:Q19866]
ENSG00000196839, ENSG00000168803	ADA, ADAL	C44B7.12, C06G3.5	C44B7.12		Adenosine deaminase-like protein [Source:UniProtKB/Swiss-Prot;Acc:Q8IG39]
ENSG00000185565, ENSG00000182667, ENSG00000183715, ENSG00000142549, ENSG00000172260	NTM, IGLON5, LSAMP, NEGR1, OPCML	rig-5	rig-5		NeuRonal IGCAM [Source:UniProtKB/TrEMBL;Acc:Q93350]
ENSG00000139233	LLPH	C49H3.3	C49H3.3
ENSG00000155876, ENSG00000083750	RRAGA, RRAGB	raga-1	raga-1		RAs-related GTP-binding protein A [Source:UniProtKB/TrEMBL;Acc:Q22743]
ENSG00000147133, ENSG00000122728	TAF1, TAF1L	taf-1	taf-1	TAF1	Transcription initiation factor TFIID subunit 1 [Source:UniProtKB/Swiss-Prot;Acc:G5EGM3]
ENSG00000047410	TPR	npp-21, syp-1	npp-21, syp-1	TPR	Nuclear Pore complex Protein [Source:UniProtKB/TrEMBL;Acc:Q5WRT9]
ENSG00000162236	STX5	syx-5	syx-5		Putative syntaxin-5 [Source:UniProtKB/Swiss-Prot;Acc:Q20797]
ENSG00000091732	ZC3HC1	C49H3.9	C49H3.9
ENSG00000159322	ADPGK	C50D2.7	C50D2.7		Probable ADP-dependent glucokinase [Source:UniProtKB/Swiss-Prot;Acc:Q86S40]
ENSG00000108848	LUC7L3	Y119D3B.12, C50D2.8	Y119D3B.12, C50D2.8
ENSG00000061936	SFSWAP	swp-1	swp-1		Splicing factor (Suppressor of White aPricot) related [Source:UniProtKB/TrEMBL;Acc:H2KY78]
ENSG00000100294	MCAT	C50D2.9	C50D2.9
ENSG00000076924	XAB2	C50F2.3	C50F2.3
ENSG00000167674, ENSG00000164985, ENSG00000166503, ENSG00000112273, ENSG00000143321	HDGFL1, HDGF, PSIP1, CTB-50L17.10, RP11-382A20.3	C06A5.3	C06A5.3
ENSG00000080603, ENSG00000183495, ENSG00000185684	SRCAP, EP400, EP400NL	ssl-1	ssl-1	SRCAP	Helicase ssl-1 [Source:UniProtKB/Swiss-Prot;Acc:Q9NEL2]
ENSG00000166337	TAF10	taf-10	taf-10		Transcription initiation factor TFIID subunit 10 [Source:UniProtKB/TrEMBL;Acc:Q95ZS0]
ENSG00000175216	CKAP5	zyg-9, T08D2.8	zyg-9	CKAP5	Zygote defective protein 9 [Source:UniProtKB/Swiss-Prot;Acc:G5EEM5]
ENSG00000268946, ENSG00000085224	ATRX	xnp-1	xnp-1		Transcriptional regulator ATRX homolog [Source:UniProtKB/Swiss-Prot;Acc:Q9U7E0]
ENSG00000147724, ENSG00000082269	FAM135A, FAM135B	C09D4.4	C09D4.4	FAM135A
ENSG00000138385	SSB	C44E4.4	C44E4.4	SSB
ENSG00000112984, ENSG00000137807, ENSG00000138182	KIF20A, KIF23, KIF20B	zen-4	zen-4	KIF20B	Kinesin-like protein [Source:UniProtKB/TrEMBL;Acc:G5EG83]
ENSG00000136936	XPA	xpa-1	xpa-1		XPA (Xeroderma pigmentosum comp grp A) related [Source:UniProtKB/TrEMBL;Acc:Q21302]
ENSG00000215277	RNF212B	zhp-3, D1081.9	zhp-3, D1081.9		Zip (Yeast meiotic zipper) Homologous Protein [Source:UniProtKB/TrEMBL;Acc:C6KRL6]
ENSG00000197321	SVIL	viln-1	viln-1	SVIL	VILliN related [Source:UniProtKB/TrEMBL;Acc:P91041]
ENSG00000088930, ENSG00000114127	XRN1, XRN2	xrn-2, xrn-1	xrn-1	XRN1	5'-3' exoribonuclease 2 homolog [Source:UniProtKB/Swiss-Prot;Acc:Q9U299]
ENSG00000101654	RNMT	tag-72	tag-72	RNMT	mRNA cap guanine-N7 methyltransferase [Source:UniProtKB/Swiss-Prot;Acc:Q9XVS1]
ENSG00000123594, ENSG00000066427	ATXN3L, ATXN3	atx-3	atx-3		Ataxin-3 homolog [Source:UniProtKB/Swiss-Prot;Acc:O17850]
ENSG00000167965	MLST8	C10H11.8	C10H11.8
ENSG00000037897	METTL1	W02B12.10	W02B12.10		tRNA (guanine-N(7)-)-methyltransferase [Source:UniProtKB/Swiss-Prot;Acc:Q23126]
ENSG00000103549, ENSG00000155827	RNF20, RNF40	rfp-1	rfp-1		E3 ubiquitin-protein ligase bre-1 [Source:UniProtKB/Swiss-Prot;Acc:P34537]
ENSG00000004866, ENSG00000007341	ST7, ST7L	F11A10.5	F11A10.5	ST7L	Protein ST7 homolog [Source:UniProtKB/Swiss-Prot;Acc:Q19337]
ENSG00000158220, ENSG00000117868, ENSG00000139641	ESYT1, ESYT2, ESYT3	esyt-2, snt-2	esyt-2		Extended SYnapTotagmin homolog [Source:UniProtKB/TrEMBL;Acc:H2KYW6]
ENSG00000156304, ENSG00000213079	SCAF4, SCAF8	nrd-1	nrd-1		NRD (Yeast Nuclear pre-mRNA Down-regulation) homolog [Source:UniProtKB/TrEMBL;Acc:O01864]
ENSG00000136504, ENSG00000172977, ENSG00000103510, ENSG00000156650, ENSG00000083168	KAT5, KAT6B, KAT8, KAT7, KAT6A	mys-1, mys-2, lsy-12, mys-4	mys-1, mys-2, lsy-12, mys-4		Histone acetyltransferase Tip60 homolog [Source:UniProtKB/Swiss-Prot;Acc:Q9TYU5]
ENSG00000135999, ENSG00000120616	EPC1, EPC2	epc-1	epc-1	EPC1	Enhancer of PolyComb-like; Enhancer of polycomb [Source:UniProtKB/TrEMBL;Acc:G5EC14]
ENSG00000159346, ENSG00000006831	ADIPOR2, ADIPOR1	paqr-2, paqr-1	paqr-2, paqr-1	ADIPOR2	Progestin and AdipoQ Receptor family [Source:UniProtKB/TrEMBL;Acc:Q9N536]
ENSG00000155304	HSPA13	stc-1	stc-1	HSPA13	STCH (Truncated HSP) family [Source:UniProtKB/TrEMBL;Acc:Q20752]
ENSG00000136758, ENSG00000141385	AFG3L2, YME1L1	Y73B3A.21, spg-7, ymel-1	ymel-1	YME1L1
ENSG00000164244	PRRC1	C04G6.4	C04G6.4	PRRC1
ENSG00000130706	ADRM1	C56G2.7	C56G2.7
ENSG00000143179, ENSG00000130717, ENSG00000198276	UCK1, UCK2, UCKL1	B0001.4, F19B6.1	F19B6.1		Probable uridine-cytidine kinase [Source:UniProtKB/Swiss-Prot;Acc:Q17413]
ENSG00000167987, ENSG00000176428, ENSG00000139722, ENSG00000155975	VPS37D, VPS37C, VPS37A, VPS37B	vps-37, CD4.5	vps-37		Related to yeast Vacuolar Protein Sorting factor [Source:UniProtKB/TrEMBL;Acc:O44158]
ENSG00000091127, ENSG00000129317	PUS7L, PUS7	B0024.11	B0024.11		Putative pseudouridine synthase B0024.11 [Source:UniProtKB/Swiss-Prot;Acc:Q17426]
ENSG00000221869, ENSG00000092067	CEBPD, CEBPE	cebp-1, zip-4	zip-4		C/EBP (CCAAT/enhancer-binding protein) homolog [Source:UniProtKB/TrEMBL;Acc:Q18909]
ENSG00000121775, ENSG00000176142	TMEM39B, TMEM39A	D1007.5	D1007.5	TMEM39A
ENSG00000203995, ENSG00000162378	ZYG11B, ZYG11A	zyg-11	zyg-11		Early embryogenesis protein zyg-11 [Source:UniProtKB/Swiss-Prot;Acc:P21541]
ENSG00000182670	TTC3	C09E7.8, C09E7.7, F27B3.5, C09E7.9	C09E7.8
ENSG00000143977	SNRPG	snr-7	snr-7		Probable small nuclear ribonucleoprotein G [Source:UniProtKB/Swiss-Prot;Acc:Q9N4G9]
ENSG00000214793, ENSG00000128039	SRD5A3	B0024.13	B0024.13		Polyprenol reductase [Source:UniProtKB/Swiss-Prot;Acc:Q17428]
ENSG00000144597, ENSG00000145088	EAF2, EAF1	eaf-1	eaf-1		ELL Associated Factor homolog [Source:UniProtKB/TrEMBL;Acc:Q9TXQ9]
ENSG00000167088	SNRPD1	snr-3	snr-3		Probable small nuclear ribonucleoprotein Sm D1 [Source:UniProtKB/Swiss-Prot;Acc:Q10013]
ENSG00000100028	SNRPD3	snr-1	snr-1	SNRPD3	Small nuclear ribonucleoprotein Sm D3 [Source:UniProtKB/Swiss-Prot;Acc:Q17348]
ENSG00000110711, ENSG00000129221	AIP, AIPL1	C56C10.10	C56C10.10
ENSG00000054796	SPO11	spo-11	spo-11		Meiotic recombination protein spo-11 [Source:UniProtKB/Swiss-Prot;Acc:Q22236]
ENSG00000198331	HYLS1	hyls-1	hyls-1
ENSG00000120800	UTP20	tag-184	tag-184
ENSG00000154511, ENSG00000165716, ENSG00000187773	FAM69B, FAM69A, FAM69C	C53D5.1	C53D5.1
ENSG00000153879	CEBPG	cebp-2	cebp-2		C/EBP (CCAAT/enhancer-binding protein) homolog [Source:UniProtKB/TrEMBL;Acc:Q8IG69]
ENSG00000104835, ENSG00000031698	SARS, SARS2	sars-2, sars-1	sars-1		Seryl Amino-acyl tRNA Synthetase; Seryl-tRNA synthetase [Source:UniProtKB/TrEMBL;Acc:G5EF77]
ENSG00000112309, ENSG00000109956, ENSG00000149541	B3GAT2, B3GAT3, B3GAT1	sqv-8, glct-1, glct-6, glct-5, glct-2, glct-3, glct-4	glct-6		Galactosylgalactosylxylosylprotein 3-beta-glucuronosyltransferase sqv-8 [Source:UniProtKB/Swiss-Prot;Acc:Q09363]
ENSG00000131873, ENSG00000198108	CHSY1, CHSY3	sqv-5	sqv-5	CHSY1, CHSY3	Chondroitin sulfate synthase sqv-5 [Source:UniProtKB/Swiss-Prot;Acc:Q7Z1Z1]
ENSG00000065615	CYB5R4	Y52B11A.3	Y52B11A.3
ENSG00000111875, ENSG00000105011	ASF1A, ASF1B	unc-85, asfl-1	asfl-1	ASF1A	Probable histone chaperone asf-1 [Source:UniProtKB/Swiss-Prot;Acc:Q19326]
ENSG00000115540	MOB4	C30A5.3	C30A5.3
ENSG00000115652	UXS1	sqv-1	sqv-1		SQuashed Vulva; UDP-glucuronic acid decarboxylase [Source:UniProtKB/TrEMBL;Acc:G5EF65]
ENSG00000131711, ENSG00000166963, ENSG00000131016, ENSG00000130479	MAP1S, MAP1A, MAP1B, AKAP12	F25D7.4, C36A4.5, F32A7.5, tag-199	F25D7.4, C36A4.5	AKAP12, MAP1B
ENSG00000196235	SUPT5H	spt-5	spt-5		Transcription elongation factor SPT5 [Source:UniProtKB/Swiss-Prot;Acc:Q21338]
ENSG00000213246	SUPT4H1	spt-4	spt-4		Transcription elongation factor SPT4 [Source:UniProtKB/Swiss-Prot;Acc:Q9TZ93]
ENSG00000006459, ENSG00000197724, ENSG00000172943	PHF8, KDM7A, PHF2	jmjd-1.1, jmjd-1.2	jmjd-1.2	PHF8	JuMonJi (Transcription factor) Domain protein [Source:UniProtKB/TrEMBL;Acc:Q20367]
ENSG00000047056	WDR37	C05D2.10	C05D2.10	WDR37
ENSG00000143921, ENSG00000118777, ENSG00000172350, ENSG00000160179	ABCG1, ABCG8, ABCG2, ABCG4	wht-5, wht-8, wht-3, wht-4, wht-7, wht-2, wht-6, wht-1	wht-2		WHiTe (Drosophila) related ABC transporter [Source:UniProtKB/TrEMBL;Acc:Q19585]
ENSG00000167771, ENSG00000117625, ENSG00000089902	RCOR1, RCOR3, RCOR2	spr-1, Y74C9A.4	spr-1		REST corepressor spr-1 [Source:UniProtKB/Swiss-Prot;Acc:Q18919]
ENSG00000112290, ENSG00000132970, ENSG00000158195	WASF3, WASF2, WASF1	wve-1	wve-1	WASF3	WAVE (Actin cytoskeleton modulator) homolog [Source:UniProtKB/TrEMBL;Acc:F5GUF0]
ENSG00000106299, ENSG00000015285	WAS, WASL	wsp-1	wsp-1	WASL	WASP (Actin cytoskeleton modulator) homolog [Source:UniProtKB/TrEMBL;Acc:Q8MQE6]
ENSG00000196505, ENSG00000138496, ENSG00000172264, ENSG00000133315	PARP9, MACROD1, MACROD2, GDAP2	B0035.3	B0035.3
ENSG00000021574, ENSG00000132436, ENSG00000182263	FIGNL1, SPAST, FIGN	spas-1, figl-1	figl-1	SPAST, FIGN	Probable spastin homolog spas-1 [Source:UniProtKB/Swiss-Prot;Acc:Q8MNV0]
ENSG00000169249, ENSG00000161265, ENSG00000160201, ENSG00000212643, ENSG00000233556	U2AF1L4, ZRSR1, ZRSR2, U2AF1	uaf-2	uaf-2		U2AF splicing factor [Source:UniProtKB/TrEMBL;Acc:Q9U2U0]
ENSG00000177302	TOP3A	top-3	top-3		DNA topoisomerase 3 [Source:UniProtKB/Swiss-Prot;Acc:O61660]
ENSG00000137947	GTF2B	ttb-1	ttb-1		Transcription initiation factor IIB [Source:UniProtKB/Swiss-Prot;Acc:O16991]
ENSG00000064419	TNPO3	tsr-1	tsr-1		Transporter of SR proteins [Source:UniProtKB/TrEMBL;Acc:O17244]
ENSG00000154997, ENSG00000138758, ENSG00000125354, ENSG00000164402, ENSG00000186522	SEPT6, SEPT11, SEPT8, SEPT10, SEPT14	unc-61	unc-61
ENSG00000155275	TRMT44	C23G10.7	C23G10.7		Probable tRNA (uracil-O(2)-)-methyltransferase [Source:UniProtKB/Swiss-Prot;Acc:Q45EK7]
ENSG00000133247, ENSG00000110066	SUV420H1, SUV420H2	set-4	set-4	SUV420H1	Histone-lysine N-methyltransferase Suv4-20 [Source:UniProtKB/Swiss-Prot;Acc:Q09265]
ENSG00000153130	SCOC	unc-69	unc-69	SCOC	Short coiled-coil domain-containing protein UNC-69 splice variant T07A5.6b [Source:UniProtKB/TrEMBL;Acc:G5EDQ5]
ENSG00000071127	WDR1	unc-78, aipl-1	aipl-1		Actin-interacting protein 1 [Source:UniProtKB/Swiss-Prot;Acc:Q11176]
ENSG00000108604, ENSG00000066117, ENSG00000082014	SMARCD2, SMARCD1, SMARCD3	swsn-2.2, swsn-2.1	swsn-2.2		SWI/SNF nucleosome remodeling complex component [Source:UniProtKB/TrEMBL;Acc:O02101]
ENSG00000268021, ENSG00000118094	TREH	tre-2, tre-4, tre-1, tre-5, tre-3	tre-2		Trehalase [Source:UniProtKB/TrEMBL;Acc:Q7K866]
ENSG00000149260, ENSG00000077274, ENSG00000103326, ENSG00000262875	CAPN6, CAPN5, CAPN15	tra-3, W05G11.4, F44F1.3, T11A5.6	F44F1.3		Calpain-5 [Source:UniProtKB/Swiss-Prot;Acc:Q22036]
ENSG00000174332, ENSG00000107249	GLIS3, GLIS1	tra-1	tra-1		Sex-determining transformer protein 1 [Source:UniProtKB/Swiss-Prot;Acc:P34708]
ENSG00000127564	PKMYT1	wee-1.1, wee-1.3	wee-1.3		Membrane-associated tyrosine- and threonine-specific cdc2-inhibitory kinase wee-1.1 [Source:UniProtKB/Swiss-Prot;Acc:Q20085]
ENSG00000067141, ENSG00000187323	NEO1, DCC	unc-40	unc-40	DCC	Unc-40 protein [Source:UniProtKB/TrEMBL;Acc:G5EF96]
ENSG00000196981, ENSG00000196363	WDR5B, WDR5	wdr-5.3, wdr-5.2, wdr-5.1	wdr-5.3		WD repeat-containing protein wdr-5.3 [Source:UniProtKB/Swiss-Prot;Acc:Q23256]
ENSG00000104343	UBE2W	ubc-16	ubc-16	UBE2W	UBiquitin Conjugating enzyme [Source:UniProtKB/TrEMBL;Acc:Q9XWF6]
ENSG00000138111	TMEM180	C27H5.4, F28B3.5, F10E7.3	F28B3.5
ENSG00000182158, ENSG00000157613	CREB3L1, CREB3L2	crh-2	crh-2	CREB3L2	CREB Homolog [Source:UniProtKB/TrEMBL;Acc:Q4JFH9]
ENSG00000138468, ENSG00000112701	SENP7, SENP6	ulp-4, ulp-2	ulp-2	SENP6	Ubiquitin-like protease 4 [Source:UniProtKB/Swiss-Prot;Acc:Q09275]
ENSG00000163904, ENSG00000119231, ENSG00000079387, ENSG00000161956	SENP5, SENP1, SENP3, SENP2	ulp-1	ulp-1		Sentrin-specific protease [Source:UniProtKB/Swiss-Prot;Acc:Q09353]
ENSG00000139428	MMAB	mmab-1	mmab-1	MMAB	MethylMalonic Aciduria type B homolog [Source:UniProtKB/TrEMBL;Acc:Q18218]
ENSG00000070010	UFD1L	ufd-1	ufd-1		Ubiquitin fusion degradation protein 1 homolog [Source:UniProtKB/Swiss-Prot;Acc:Q19584]
ENSG00000153291	SLC25A27	ucp-4	ucp-4	SLC25A27	UnCoupling Protein (Mitochondrial substrate carrier) [Source:UniProtKB/TrEMBL;Acc:O01883]
ENSG00000065609, ENSG00000073921	PICALM, SNAP91	unc-11	unc-11		Phosphatidylinositol-binding clathrin assembly protein unc-11 [Source:UniProtKB/Swiss-Prot;Acc:Q9XZI6]
ENSG00000138834, ENSG00000008294	SPAG9, MAPK8IP3	unc-16	unc-16		JNK-interacting protein [Source:UniProtKB/Swiss-Prot;Acc:P34609]
ENSG00000099804, ENSG00000107341	CDC34, UBE2R2	ubc-3	ubc-3	UBE2R2	UBiquitin Conjugating enzyme [Source:UniProtKB/TrEMBL;Acc:W6RY98]
ENSG00000154277, ENSG00000118939	UCHL1, UCHL3	ubh-2, ubh-1, ubh-3	ubh-3	UCHL1	Ubiquitin carboxyl-terminal hydrolase [Source:UniProtKB/TrEMBL;Acc:Q8MNY0]
ENSG00000185104, ENSG00000078140	UBE2K, FAF1	ubc-22, ubxn-3, ubc-21, ubc-23, ubc-20	ubxn-3	UBE2K	UBiquitin Conjugating enzyme [Source:UniProtKB/TrEMBL;Acc:Q17720]
ENSG00000033627, ENSG00000185344, ENSG00000105929, ENSG00000110719	ATP6V0A2, ATP6V0A1, TCIRG1, ATP6V0A4	unc-32, vha-5, vha-6, vha-7	vha-7		Probable V-type proton ATPase 116 kDa subunit a [Source:UniProtKB/Swiss-Prot;Acc:P30628]
ENSG00000167740	CYB5D2	tag-131	tag-131		Neuferricin homolog [Source:UniProtKB/Swiss-Prot;Acc:Q9XXA7]
ENSG00000164898	C7orf55	C29E4.12	C29E4.12		Protein FMC1 homolog [Source:UniProtKB/Swiss-Prot;Acc:Q8MNU8]
ENSG00000235418, ENSG00000196781, ENSG00000104964, ENSG00000106829, ENSG00000104953, ENSG00000065717, ENSG00000140332	TLE4, AES, TLE3, TLE6, TLE1, TLE2	unc-37	unc-37	TLE1	Transcription factor unc-37 [Source:UniProtKB/Swiss-Prot;Acc:O02482]
ENSG00000184428, ENSG00000198900	TOP1, TOP1MT	top-1	top-1		DNA topoisomerase 1 [Source:UniProtKB/Swiss-Prot;Acc:O17966]
ENSG00000152683	SLC30A6	toc-1	toc-1		Similar to Transporter Of divalent Cations [Source:UniProtKB/TrEMBL;Acc:Q23281]
ENSG00000138032, ENSG00000213889, ENSG00000100614, ENSG00000115241	PPM1B, PPM1N, PPM1G, PPM1A	ppm-1, T23F11.1, F42G9.1	F42G9.1	PPM1B, PPM1G, PPM1A	Protein phosphatase ppm-1 [Source:UniProtKB/Swiss-Prot;Acc:Q19775]
ENSG00000158560, ENSG00000162643, ENSG00000077380, ENSG00000152763, ENSG00000171595, ENSG00000119333, ENSG00000122735	DNAI2, WDR63, WDR34, DNAI1, DYNC1I1, DYNC1I2, WDR78	dyci-1	dyci-1		DYnein Chain, light Intermediate [Source:UniProtKB/TrEMBL;Acc:O45087]
ENSG00000173145	NOC3L	C37H5.5	C37H5.5		Nucleolar complex protein 3 homolog [Source:UniProtKB/Swiss-Prot;Acc:P91136]
ENSG00000143952	VPS54	vps-54	vps-54	VPS54	Vacuolar protein sorting-associated protein 54 [Source:UniProtKB/Swiss-Prot;Acc:Q22639]
ENSG00000141424, ENSG00000104635, ENSG00000138821	SLC39A6, SLC39A8, SLC39A14	tag-140, Y55F3BL.2	Y55F3BL.2	SLC39A6, SLC39A14
ENSG00000110925, ENSG00000178662, ENSG00000144655	CSRNP1, CSRNP2, CSRNP3	C41D11.3	C41D11.3
ENSG00000132740	IGHMBP2	eri-7	eri-7		Enhanced RNAI (RNA interference) [Source:UniProtKB/TrEMBL;Acc:O01976]
ENSG00000184277	TM2D3	C41D11.9	C41D11.9	TM2D3	TM2 domain-containing protein C41D11.9 [Source:UniProtKB/Swiss-Prot;Acc:Q95QZ5]
ENSG00000117859	OSBPL9	obr-4	obr-4		Oxysterol-binding protein [Source:UniProtKB/TrEMBL;Acc:O01686]
ENSG00000125304, ENSG00000101337	TM9SF2, TM9SF4	ZK858.6, tag-123	ZK858.6		Transmembrane 9 superfamily member [Source:UniProtKB/TrEMBL;Acc:B3WFW5]
ENSG00000081721	DUSP12	C24F3.2	C24F3.2
ENSG00000087263	OGFOD1	C17G10.1	C17G10.1
ENSG00000114902	SPCS1	C34B2.10	C34B2.10	SPCS1	Probable signal peptidase complex subunit 1 [Source:UniProtKB/Swiss-Prot;Acc:O44953]
ENSG00000111144	LTA4H	C42C1.11, ZC416.6	C42C1.11		Aminopeptidase-1 [Source:UniProtKB/TrEMBL;Acc:G5EFT4]
ENSG00000100813, ENSG00000137776, ENSG00000160633, ENSG00000130254, ENSG00000164597	SAFB2, SAFB, ACIN1, COG5, SLTM	cogc-5, acin-1	cogc-5, acin-1	COG5	Conserved Oligomeric Golgi (COG) Component [Source:UniProtKB/TrEMBL;Acc:P91151]
ENSG00000165118	C9orf64	C11D2.4	C11D2.4	C9orf64
ENSG00000182473	EXOC7	exoc-7	exoc-7		EXOCyst component [Source:UniProtKB/TrEMBL;Acc:P91149]
ENSG00000167721	TSR1	tag-151	tag-151		Pre-rRNA-processing protein TSR1 homolog [Source:UniProtKB/Swiss-Prot;Acc:Q19329]
ENSG00000153006	SREK1IP1	C13F10.7	C13F10.7
ENSG00000125166, ENSG00000120053, ENSG00000169154	GOT2, GOT1, GOT1L1	got-1.1, got-2.2, got-1.2, got-1.3, got-2.1	got-2.1
ENSG00000169217	CD2BP2	teg-1	teg-1		Tumorous Enhancer of Glp-1(Gf) [Source:UniProtKB/TrEMBL;Acc:Q9NAH3]
ENSG00000164091	WDR82	swd-2.1, swd-2.2	swd-2.1, swd-2.2		Set1 WD40 repeat protein homolog [Source:UniProtKB/TrEMBL;Acc:Q18404]
ENSG00000070367	EXOC5	sec-10	sec-10	EXOC5	Exocyst complex component 5 [Source:UniProtKB/Swiss-Prot;Acc:Q18406]
ENSG00000028839	TBPL1	tlf-1	tlf-1		TBP-Like Factor; TBP-like factor [Source:UniProtKB/TrEMBL;Acc:G5EC52]
ENSG00000111602	TIMELESS	tim-1	tim-1		Protein timeless homolog [Source:UniProtKB/Swiss-Prot;Acc:G5EDN3]
ENSG00000130024	PHF10	phf-10	phf-10	PHF10	PHd Finger family [Source:UniProtKB/TrEMBL;Acc:Q2A949]
ENSG00000162869	PPP1R21	F33E11.3	F33E11.3
ENSG00000132437	DDC	tdc-1	tdc-1		Tyrosine decarboxylase [Source:UniProtKB/Swiss-Prot;Acc:Q95ZS2]
ENSG00000083123	BCKDHB	tag-173	tag-173	BCKDHB
ENSG00000163754, ENSG00000056998, ENSG00000206159	GYG2P1, GYG1, GYG2	gyg-2, M116.2, gyg-1	gyg-2		GlYcoGenin like [Source:UniProtKB/TrEMBL;Acc:O45819]
ENSG00000198042	MAK16	C16A3.6	C16A3.6	MAK16	Protein MAK16 homolog [Source:UniProtKB/TrEMBL;Acc:Q18035]
ENSG00000112592, ENSG00000182521	TBP, TBPL2	tbp-1	tbp-1		TATA-box-binding protein [Source:UniProtKB/Swiss-Prot;Acc:P32085]
ENSG00000131462, ENSG00000037042	TUBG2, TUBG1	tbg-1	tbg-1		Tubulin gamma chain [Source:UniProtKB/Swiss-Prot;Acc:P34475]
ENSG00000226817, ENSG00000204771, ENSG00000171495, ENSG00000134042, ENSG00000185038, ENSG00000179832	MRO, MROH2A, MROH1, MROH2B	hpo-27	hpo-27
ENSG00000166471, ENSG00000163900	TMEM41B, TMEM41A	tag-175, Y71A12C.2, bus-19	tag-175	TMEM41B, TMEM41A	Transmembrane protein 41 homolog [Source:UniProtKB/Swiss-Prot;Acc:O62126]
ENSG00000155744, ENSG00000122591	FAM126A, FAM126B	D1069.3	D1069.3	FAM126A, FAM126B
ENSG00000169490	TM2D2	C02F5.13	C02F5.13		TM2 domain-containing protein C02F5.13 [Source:UniProtKB/Swiss-Prot;Acc:P61228]
ENSG00000198056	PRIM1	T24C4.5, pri-1	pri-1		DNA primase [Source:UniProtKB/TrEMBL;Acc:Q9TZ34]
ENSG00000196632, ENSG00000060237, ENSG00000126562, ENSG00000165238	WNK1, WNK2, WNK3, WNK4	wnk-1	wnk-1	WNK1	Serine/threonine-protein kinase WNK [Source:UniProtKB/Swiss-Prot;Acc:X5M5N0]
ENSG00000196943	NOP9	ZK792.5	ZK792.5
ENSG00000182747, ENSG00000130958, ENSG00000116704	SLC35D3, SLC35D2, SLC35D1	sqv-7	sqv-7		UDP-sugar transporter sqv-7 [Source:UniProtKB/Swiss-Prot;Acc:Q18779]
ENSG00000111785, ENSG00000177963	RIC8B, RIC8A	ric-8	ric-8	RIC8B	Synembryn [Source:UniProtKB/Swiss-Prot;Acc:Q9GSX9]
ENSG00000163159	VPS72	C17E4.6	C17E4.6
ENSG00000135829, ENSG00000132153, ENSG00000067248, ENSG00000174953, ENSG00000163214, ENSG00000047188, ENSG00000156414	DHX29, TDRD9, DHX36, DHX30, YTHDC2, DHX9, DHX57	F52B5.3, rha-1	F52B5.3	YTHDC2, DHX36
ENSG00000135945	REV1	rev-1	rev-1	REV1	DNA repair protein REV1 [Source:UniProtKB/TrEMBL;Acc:Q09615]
ENSG00000180182	MED14	rgr-1	rgr-1	MED14	Mediator of RNA polymerase II transcription subunit 14 [Source:UniProtKB/Swiss-Prot;Acc:Q03570]
ENSG00000144744	UBA3	rfl-1	rfl-1		NEDD8-activating enzyme E1 catalytic subunit [Source:UniProtKB/Swiss-Prot;Acc:Q19360]
ENSG00000163918	RFC4	rfc-4	rfc-4		Replication factor C subunit 4 [Source:UniProtKB/Swiss-Prot;Acc:P53016]
ENSG00000133119	RFC3	rfc-3	rfc-3		RFC (DNA replication factor) family [Source:UniProtKB/TrEMBL;Acc:Q18547]
ENSG00000137992	DBT	ZK669.4	ZK669.4
ENSG00000115310, ENSG00000125744, ENSG00000133318, ENSG00000139970	RTN4, RTN3, RTN1, RTN2	ret-1	ret-1	RTN4, RTN3	Reticulon-like protein [Source:UniProtKB/TrEMBL;Acc:B5U8N2]
ENSG00000163029	SMC6	smc-6, C23H4.6	smc-6	SMC6	Structural maintenance of chromosomes protein 6 homolog smc-6 [Source:UniProtKB/Swiss-Prot;Acc:G5EG17]
ENSG00000108469	RECQL5	rcq-5	rcq-5		ReCQ DNA helicase family [Source:UniProtKB/TrEMBL;Acc:Q19046]
ENSG00000117139, ENSG00000012817, ENSG00000126012, ENSG00000008083, ENSG00000073614	KDM5D, KDM5B, JARID2, KDM5C, KDM5A	rbr-2	rbr-2		Lysine-specific demethylase rbr-2 [Source:UniProtKB/Swiss-Prot;Acc:Q23541]
ENSG00000069188, ENSG00000146555	SDK2, SDK1	rig-4	rig-4	SDK1	Protein sidekick homolog [Source:UniProtKB/Swiss-Prot;Acc:Q9N3X8]
ENSG00000260485, ENSG00000179950	PUF60	rnp-6	rnp-6		RNP (RRM RNA binding domain) containing [Source:UniProtKB/TrEMBL;Acc:Q9N3S3]
ENSG00000136197	C7orf25	F33G12.3	F33G12.3
ENSG00000205476, ENSG00000055813, ENSG00000175602	CCDC85C, CCDC85A, CCDC85B	F29G9.2	F29G9.2
ENSG00000183155	RABIF	ZK970.8, mdt-9	mdt-9
ENSG00000155189	AGPAT5	acl-11	acl-11	AGPAT5	ACyLtransferase-like [Source:UniProtKB/TrEMBL;Acc:Q95R12]
ENSG00000105053, ENSG00000100749, ENSG00000028116	VRK3, VRK2, VRK1	vrk-1	vrk-1	VRK2, VRK1	Serine/threonine-protein kinase VRK1 [Source:UniProtKB/Swiss-Prot;Acc:Q19848]
ENSG00000112651, ENSG00000161016	RPL8, MRPL2	rpl-2, mrpl-2	rpl-2		60S ribosomal protein L8 [Source:UniProtKB/Swiss-Prot;Acc:Q9XVF7]
ENSG00000203791	METTL10	F29B9.1	F29B9.1	METTL10	Protein-lysine N-methyltransferase CELE_F29B9.1 [Source:UniProtKB/TrEMBL;Acc:Q9GYH9]
ENSG00000129667, ENSG00000007384	RHBDF1, RHBDF2	rom-4, rom-3	rom-4		Rhomboid-like protein [Source:UniProtKB/TrEMBL;Acc:A0A0K3AS30]
ENSG00000204084, ENSG00000122126	OCRL, INPP5B	ocrl-1	ocrl-1		OCRL (Lowe's oculocerebrorenal syndrome protein) homolog [Source:UniProtKB/TrEMBL;Acc:O17590]
ENSG00000135473	PAN2	panl-2	panl-2		PAN (PolyA-specific riboNucLease) subunit [Source:RefSeq peptide;Acc:NP_498519]
ENSG00000108264, ENSG00000173011	TADA2B	ada-2	ada-2		ADA (Histone acetyltransferase complex) subunit [Source:UniProtKB/TrEMBL;Acc:Q5DX44]
ENSG00000143748	NVL	mac-1	mac-1		Member of AAA family binding CED-4 [Source:UniProtKB/TrEMBL;Acc:Q9NAG4]
ENSG00000077312, ENSG00000125870	SNRPB2, SNRPA	rnp-3, rnp-2	rnp-3	SNRPB2	RNP (RRM RNA binding domain) containing [Source:UniProtKB/TrEMBL;Acc:U4PBX2]
ENSG00000205726, ENSG00000198399	ITSN2, ITSN1	itsn-1	itsn-1	ITSN2	ITSN (Intersectin) family [Source:UniProtKB/TrEMBL;Acc:E6N0W0]
ENSG00000118873	RAB3GAP2	rbg-2	rbg-2	RAB3GAP2	Rab3 GTPase-activating protein regulatory subunit [Source:UniProtKB/Swiss-Prot;Acc:Q22670]
ENSG00000142655	PEX14	prx-14	prx-14		PeRoXisome assembly factor [Source:UniProtKB/TrEMBL;Acc:Q93930]
ENSG00000129187	DCTD	ZK643.2	ZK643.2		Probable deoxycytidylate deaminase [Source:UniProtKB/Swiss-Prot;Acc:P30648]
ENSG00000108963	DPH1	dph-1	dph-1		2-(3-amino-3-carboxypropyl)histidine synthase subunit 1 [Source:UniProtKB/Swiss-Prot;Acc:P49958]
ENSG00000196511	TPK1	tpk-1	tpk-1		Thiamin pyrophosphokinase 1 [Source:UniProtKB/Swiss-Prot;Acc:P30636]
ENSG00000198855	FICD	fic-1	fic-1		Adenosine monophosphate-protein transferase FICD homolog [Source:UniProtKB/Swiss-Prot;Acc:Q23544]
ENSG00000123213, ENSG00000172009	NLN, THOP1	ZK550.3	ZK550.3
ENSG00000138069, ENSG00000111737, ENSG00000174903	RAB35, RAB1A, RAB1B	rab-1, rab-35	rab-35	RAB1A	RAB family [Source:UniProtKB/TrEMBL;Acc:Q9UAQ6]
ENSG00000177192	PUS1	pus-1	pus-1		tRNA pseudouridine synthase [Source:UniProtKB/TrEMBL;Acc:Q9XXN0]
ENSG00000138041, ENSG00000100796	PPP4R3A	smk-1	smk-1		SMEK (Dictyostelium Suppressor of MEK null) homolog [Source:UniProtKB/TrEMBL;Acc:H2KYN7]
ENSG00000179295, ENSG00000111679, ENSG00000217801	PTPN11, PTPN6, RP11-465B22.3	ptp-2	ptp-2	PTPN6	Tyrosine-protein phosphatase non-receptor type ptp-2 [Source:UniProtKB/Swiss-Prot;Acc:G5EC24]
ENSG00000048162	NOP16	ZK265.6	ZK265.6		Nucleolar protein 16 [Source:UniProtKB/Swiss-Prot;Acc:Q94402]
ENSG00000070495	JMJD6	psr-1	psr-1		Bifunctional arginine demethylase and lysyl-hydroxylase psr-1 [Source:UniProtKB/Swiss-Prot;Acc:Q9GYI4]
ENSG00000127616, ENSG00000080503	SMARCA4, SMARCA2	C52B9.8, swsn-4	swsn-4
ENSG00000180198, SNHG3-RCC1	RCC1	ran-3	ran-3		Regulator of chromosome condensation [Source:UniProtKB/Swiss-Prot;Acc:Q18211]
ENSG00000123405, ENSG00000082641, ENSG00000116044, ENSG00000050344	NFE2L1, NFE2, NFE2L2, NFE2L3	sknr-1, skn-1	skn-1	NFE2L2	SKN Related [Source:UniProtKB/TrEMBL;Acc:A0A0M7REQ4]
ENSG00000010256, ENSG00000105819	UQCRC1, PMPCB	ucr-1, mppb-1	mppb-1	PMPCB	Cytochrome b-c1 complex subunit 1, mitochondrial [Source:UniProtKB/Swiss-Prot;Acc:P98080]
ENSG00000100056	DGCR14	ess-2	ess-2		ES2 similar protein 2 [Source:UniProtKB/Swiss-Prot;Acc:P34420]
ENSG00000162396	PARS2	pars-2	pars-2		Prolyl Amino-acyl tRNA Synthetase [Source:UniProtKB/TrEMBL;Acc:O45869]
ENSG00000115307	AUP1	F44B9.5	F44B9.5		Ancient ubiquitous protein 1 homolog [Source:UniProtKB/Swiss-Prot;Acc:P34426]
ENSG00000163798	SLC4A1AP	ZK632.2	ZK632.2	SLC4A1AP
ENSG00000089723, ENSG00000167770	OTUB2, OTUB1	otub-1	otub-1		Ubiquitin thioesterase otubain-like [Source:UniProtKB/Swiss-Prot;Acc:Q9XVR6]
ENSG00000099246	RAB18	rab-18	rab-18	RAB18	Ras-related protein Rab-18 [Source:UniProtKB/Swiss-Prot;Acc:Q8MXS1]
ENSG00000182150, ENSG00000085999, ENSG00000197275	ERCC6L2, RAD54L, RAD54B	rad-54, Y116A8C.13	rad-54, Y116A8C.13	RAD54B
ENSG00000129636	ITFG1	tag-256	tag-256	ITFG1
ENSG00000172775	FAM192A	C25A1.1	C25A1.1
ENSG00000123728, ENSG00000181467, ENSG00000125249	RAP2B, RAP2C, RAP2A	rap-2	rap-2	RAP2C	RAP homolog (Vertebrate Rap GTPase family) [Source:UniProtKB/TrEMBL;Acc:O17599]
ENSG00000261283, ENSG00000128563	PRKRIP1	F37A4.2	F37A4.2
ENSG00000173473, ENSG00000139613	SMARCC1, SMARCC2	swsn-1	swsn-1		SWI/SNF nucleosome remodeling complex component; SWI3-like protein [Source:UniProtKB/TrEMBL;Acc:G5EF87]
ENSG00000149547	EI24	epg-4	epg-4	EI24	Ectopic P granules protein 4 [Source:UniProtKB/Swiss-Prot;Acc:Q20123]
ENSG00000023909	GCLM	E01A2.1	E01A2.1
ENSG00000144785, ENSG00000146910, ENSG00000257727	CNPY2, CNPY1, RP11-977G19.10	F01F1.15	F01F1.15
ENSG00000175895, ENSG00000166289	PLEKHF2, PLEKHF1	ZK632.12	ZK632.12
ENSG00000033030	ZCCHC8	ZK632.11, Y34D9A.7	ZK632.11	ZCCHC8
ENSG00000152520	PAN3	panl-3	panl-3		PAB-dependent poly(A)-specific ribonuclease subunit PAN3 [Source:UniProtKB/Swiss-Prot;Acc:P34653]
ENSG00000172007, ENSG00000134594	RAB33A, RAB33B	rab-33	rab-33	RAB33B	Ras-related protein Rab-33 [Source:UniProtKB/Swiss-Prot;Acc:Q20365]
ENSG00000137502	RAB30	rab-30	rab-30		RAB family [Source:UniProtKB/TrEMBL;Acc:Q9XWZ3]
ENSG00000170638	TRABD	F38A5.2	F38A5.2
ENSG00000220023, ENSG00000225566, ENSG00000109536, ENSG00000149531	FRG1BP, FRG1	frg-1	frg-1		Protein FRG1 homolog [Source:UniProtKB/Swiss-Prot;Acc:O18282]
ENSG00000123600, ENSG00000087995, ENSG00000206562, ENSG00000165055	METTL6, METTL2B, METTL8, METTL2A	Y53F4B.42, ZK1058.5	Y53F4B.42	METTL8
ENSG00000139190, ENSG00000179036, ENSG00000168899, ENSG00000118640, ENSG00000049245, ENSG00000117533, ENSG00000220205	VAMP1, VAMP8, VAMP4, VAMP2, VAMP5, VAMP3	snb-2, Y69A2AR.6, snb-1, B0513.9	snb-1	VAMP4	SyNaptoBrevin related [Source:UniProtKB/TrEMBL;Acc:Q19767]
ENSG00000243668, ENSG00000106610, ENSG00000174353, ENSG00000205583, ENSG00000160828, ENSG00000118007, ENSG00000066923, ENSG00000101972	STAG1, STAG2, STAG3L3, STAG3L4, STAG3L1, STAG3	scc-3	scc-3	STAG1, STAG2	Cohesin subunit scc-3 [Source:UniProtKB/Swiss-Prot;Acc:Q19555]
ENSG00000118197, ENSG00000174243	DDX59, DDX23	ddx-23	ddx-23	DDX59	DEAD boX helicase homolog [Source:UniProtKB/TrEMBL;Acc:Q95QN2]
ENSG00000149577, ENSG00000072858	SIDT2, SIDT1	tag-130, sid-1	sid-1		Systemic RNA interference defective protein 1 [Source:UniProtKB/Swiss-Prot;Acc:Q9GZC8]
ENSG00000185379, ENSG00000051180, ENSG00000100206, ENSG00000182185, ENSG00000108384	RAD51B, DMC1, RAD51C, RAD51D, RAD51	rad-51	rad-51		RAD51 short isoform; RecA/Rad51/Dmc1-like protein [Source:UniProtKB/TrEMBL;Acc:G5EGG8]
ENSG00000080371	RAB21	rab-21	rab-21	RAB21	RAB family [Source:UniProtKB/TrEMBL;Acc:Q22045]
ENSG00000099381, ENSG00000139718	SETD1B, SETD1A	set-2	set-2		Histone-lysine N-methyltransferase set-2 [Source:UniProtKB/Swiss-Prot;Acc:Q18221]
ENSG00000215608, ENSG00000183955	SETD8	set-1	set-1	SETD8	Histone-lysine N-methyltransferase set-1 [Source:UniProtKB/Swiss-Prot;Acc:Q22795]
ENSG00000125651	GTF2F1	C01F1.1	C01F1.1
ENSG00000129158	SERGEF	glo-4	glo-4		X-linked retinitis pigmentosa GTPase regulator homolog [Source:UniProtKB/Swiss-Prot;Acc:Q5DX34]
ENSG00000143315	PIGM	B0491.1	B0491.1	PIGM
ENSG00000099917	MED15	sel-8, mdt-15	sel-8, mdt-15
ENSG00000124562	SNRPC	F08B4.7	F08B4.7		U1 small nuclear ribonucleoprotein C [Source:UniProtKB/Swiss-Prot;Acc:P90815]
ENSG00000154889	MPPE1	B0511.13	B0511.13		Metallophosphoesterase 1 homolog [Source:RefSeq peptide;Acc:NP_001251442]
ENSG00000150961, ENSG00000176986	SEC24D, SEC24C	sec-24.1	sec-24.1	SEC24D	Yeast SEC homolog [Source:UniProtKB/TrEMBL;Acc:Q19371]
ENSG00000131558	EXOC4	sec-8	sec-8		Exocyst complex component 4 [Source:UniProtKB/Swiss-Prot;Acc:Q9XWS2]
ENSG00000088205	DDX18	B0511.6	B0511.6	DDX18	RNA helicase [Source:UniProtKB/TrEMBL;Acc:O61815]
ENSG00000018189, ENSG00000177548, ENSG00000176783, ENSG00000204130, ENSG00000029725	RUFY3, RUFY1, RUFY2, RABEP2, RABEP1	rabn-5	rabn-5		RABaptiN (Rab effector) [Source:UniProtKB/TrEMBL;Acc:Q19088]
ENSG00000187118	CMC1	F01F1.2	F01F1.2
ENSG00000108773, ENSG00000114166	KAT2A, KAT2B	pcaf-1	pcaf-1		P300/CBP Associated Factor homolog [Source:UniProtKB/TrEMBL;Acc:Q9N3S7]
ENSG00000120688	WBP4	F56G4.4	F56G4.4
ENSG00000213145, ENSG00000257341, ENSG00000101265	AL928654.7, RASSF2, CRIP1	exc-9, valv-1	exc-9
ENSG00000101413, ENSG00000141425	RPRD1B, RPRD1A	cids-1	cids-1	RPRD1B, RPRD1A	CID domain-containing protein 1 [Source:UniProtKB/Swiss-Prot;Acc:P34281]
ENSG00000134375, ENSG00000267823, ENSG00000126768	TIMM17A, TIMM17B	E04A4.5, D2096.1	E04A4.5
ENSG00000143434, ENSG00000137872, ENSG00000092421, ENSG00000167680	SEMA6C, SEMA6A, SEMA6B, SEMA6D	smp-1	smp-1		Semaphorin-1A [Source:UniProtKB/Swiss-Prot;Acc:Q17330]
ENSG00000058804, ENSG00000163354	NDC1, DCST2	npp-22, spe-42	npp-22		Nucleoporin ndc-1 [Source:UniProtKB/Swiss-Prot;Acc:Q8I4N3]
ENSG00000198952, ENSG00000116698, ENSG00000070366	SMG5, SMG6, SMG7	smg-6	smg-6		Suppressor with Morphological effect on Genitalia [Source:UniProtKB/TrEMBL;Acc:Q9BL69]
ENSG00000168175	MAPK1IP1L	C02B10.5	C02B10.5
ENSG00000118454	ANKRD13C	C01F1.6	C01F1.6
ENSG00000134146	DPH6	E01A2.5	E01A2.5		Diphthine--ammonia ligase [Source:UniProtKB/TrEMBL;Acc:Q966L4]
ENSG00000108055	SMC3	smc-3	smc-3	SMC3	Structural maintenance of chromosomes protein 3 [Source:UniProtKB/Swiss-Prot;Acc:B2FDA8]
ENSG00000198690	FAN1	fan-1	fan-1		Fanconi-associated nuclease 1 homolog [Source:UniProtKB/Swiss-Prot;Acc:P90740]
ENSG00000177646, ENSG00000072778	ACADVL, ACAD9	acdh-12	acdh-12		Acyl CoA DeHydrogenase [Source:UniProtKB/TrEMBL;Acc:Q6AHQ5]
ENSG00000131373, ENSG00000105135	HACL1, ILVBL	T26C12.1, B0334.3	T26C12.1		Acetolactate synthase-like protein [Source:UniProtKB/Swiss-Prot;Acc:O61856]
ENSG00000111237	VPS29	vps-29	vps-29	VPS29	Vacuolar protein sorting-associated protein 29 [Source:UniProtKB/TrEMBL;Acc:Q9XVX5]
ENSG00000163605	PPP4R2	ppfr-2	ppfr-2	PPP4R2	Protein Phosphatase Four Regulatory subunit [Source:UniProtKB/TrEMBL;Acc:P91198]
ENSG00000073910, ENSG00000075539	FRYL, FRY	sax-2	sax-2		Sensory AXon guidance [Source:UniProtKB/TrEMBL;Acc:Q5DX48]
ENSG00000124201	ZNFX1	ZK1067.2	ZK1067.2
ENSG00000006282	SPATA20	B0495.5	B0495.5
ENSG00000116001, ENSG00000151923	TIA1, TIAL1	tiar-2, tiar-3, tiar-1	tiar-2	TIA1, TIAL1	TIA-1/TIAL RNA binding protein homolog [Source:UniProtKB/TrEMBL;Acc:Q9U2F5]
ENSG00000160294	MCM3AP	F20D12.2	F20D12.2
ENSG00000140995	DEF8	F20H11.1	F20H11.1		Differentially expressed in FDCP 8 homolog [Source:UniProtKB/Swiss-Prot;Acc:O01738]
ENSG00000189079	ARID2	swsn-7	swsn-7	ARID2	SWI/SNF nucleosome remodeling complex component [Source:UniProtKB/Swiss-Prot;Acc:Q09441]
ENSG00000108671	PSMD11	rpn-6.2, rpn-6.1	rpn-6.1		Probable 26S proteasome regulatory subunit rpn-6.2 [Source:UniProtKB/Swiss-Prot;Acc:P34481]
ENSG00000197170	PSMD12	rpn-5	rpn-5	PSMD12	Proteasome Regulatory Particle, Non-ATPase-like [Source:UniProtKB/TrEMBL;Acc:Q19324]
ENSG00000132768	DPH2	dph-2	dph-2		2-(3-amino-3-carboxypropyl)histidine synthase subunit 2 [Source:UniProtKB/Swiss-Prot;Acc:Q09454]
ENSG00000145041	VPRBP	dcaf-1	dcaf-1	VPRBP	DDB1- and CUL4-associated factor homolog 1 [Source:UniProtKB/Swiss-Prot;Acc:Q21106]
ENSG00000132780	NASP	nasp-2, nasp-1	nasp-2, nasp-1		NASP (Human Nuclear Autoantigenic Sperm Protein) homolog [Source:UniProtKB/TrEMBL;Acc:O17687]
ENSG00000169230	PRELID1	B0334.4	B0334.4
ENSG00000111358	GTF2H3	ZK1128.4	ZK1128.4
ENSG00000165916	PSMC3	rpt-5	rpt-5		Proteasome Regulatory Particle, ATPase-like [Source:UniProtKB/TrEMBL;Acc:O76371]
ENSG00000139719, ENSG00000184056	VPS33A, VPS33B	vps-33.1, vps-33.2	vps-33.2		Vacuolar protein sorting-associated protein 33A [Source:UniProtKB/Swiss-Prot;Acc:P34260]
ENSG00000162613, ENSG00000088247, ENSG00000107164	FUBP1, KHSRP, FUBP3	ZK418.9, C12D8.1, M01A10.1, C36E6.1	ZK418.9	KHSRP
ENSG00000239857, ENSG00000105972	GET4	cee-1	cee-1		Conserved Edge Expressed protein [Source:UniProtKB/TrEMBL;Acc:Q19824]
ENSG00000132383	RPA1	rpa-1	rpa-1		Probable replication factor A 73 kDa subunit [Source:UniProtKB/Swiss-Prot;Acc:Q19537]
ENSG00000084090	STARD7	C06H2.2	C06H2.2
ENSG00000268778, ENSG00000170889	RPS9	rps-9	rps-9		40S ribosomal protein S9 [Source:UniProtKB/Swiss-Prot;Acc:Q20228]
ENSG00000087191	PSMC5	F56F11.4, rpt-6	F56F11.4
ENSG00000132356, ENSG00000162409, ENSG00000174672, ENSG00000160469	BRSK2, PRKAA1, PRKAA2, BRSK1	aak-2, sad-1, aak-1	aak-1		5'-AMP-activated protein kinase catalytic subunit alpha-2 [Source:UniProtKB/Swiss-Prot;Acc:Q95ZQ4]
ENSG00000133226, ENSG00000177679, ENSG00000139767	SRRM1, SRRM3, SRRM4	rsr-1	rsr-1		SR protein related [Source:UniProtKB/TrEMBL;Acc:O62185]
ENSG00000147471	PROSC	F09E5.7, F09E5.8	F09E5.7	PROSC
ENSG00000188529, ENSG00000161547, ENSG00000214754, ENSG00000180771, ENSG00000215699	SRSF10, SRSF2, AC004870.5	rsp-4	rsp-4		Probable splicing factor, arginine/serine-rich 4 [Source:UniProtKB/Swiss-Prot;Acc:Q09511]
SFRS4		rsp-2	rsp-2		Probable splicing factor, arginine/serine-rich 2 [Source:UniProtKB/Swiss-Prot;Acc:Q23120]
ENSG00000165934	CPSF2	cpsf-2	cpsf-2	CPSF2	Probable cleavage and polyadenylation specificity factor subunit 2 [Source:UniProtKB/Swiss-Prot;Acc:O17403]
ENSG00000137876	RSL24D1	rpl-24.2	rpl-24.2		Probable ribosome biogenesis protein RLP24 [Source:UniProtKB/Swiss-Prot;Acc:Q17606]
ENSG00000235183, ENSG00000140319	RP11-613C6.4, SRP14	F25G6.9, F25G6.8	F25G6.9
ENSG00000177602	GSG2	Y18H1A.10, Y40A1A.1, C01H6.9, F22H10.5	C01H6.9
ENSG00000156869	FRRS1	C13B4.1, C05D12.1	C13B4.1
ENSG00000152219	ARL14EP	B0336.5	B0336.5
ENSG00000065183	WDR3	F13H8.2	F13H8.2
ENSG00000165280	VCP	cdc-48.1, cdc-48.2	cdc-48.2		Transitional endoplasmic reticulum ATPase homolog 1 [Source:UniProtKB/Swiss-Prot;Acc:P54811]
ENSG00000115268	RPS15	rps-15	rps-15		40S ribosomal protein S15 [Source:UniProtKB/Swiss-Prot;Acc:Q9XVP0]
ENSG00000135040	NAA35	T23B12.4	T23B12.4
ENSG00000047315, ENSG00000013503	POLR3B, POLR2B	rpb-2, F09F7.3	rpb-2	POLR2B	DNA-directed RNA polymerase II subunit RPB2 [Source:UniProtKB/Swiss-Prot;Acc:Q10578]
ENSG00000131504, ENSG00000147202, ENSG00000139734	DIAPH1, DIAPH3, DIAPH2	cyk-1	cyk-1	DIAPH1, DIAPH3	CYtoKinesis defect [Source:UniProtKB/TrEMBL;Acc:H2KYI3]
ENSG00000103319, ENSG00000073331	ALPK1, EEF2K	efk-1	efk-1		Eukaryotic elongation factor 2 kinase [Source:UniProtKB/Swiss-Prot;Acc:O01991]
ENSG00000108561	C1QBP	cri-3	cri-3		Conserved regulator of innate immunity protein 3 [Source:UniProtKB/Swiss-Prot;Acc:Q21018]
ENSG00000089685	BIRC5	bir-1, bir-2	bir-1, bir-2		BIR (Baculovirus inhibitory repeat) family; Inhibitor of apoptosis homolog [Source:UniProtKB/TrEMBL;Acc:G5EFA2]
ENSG00000131374	TBC1D5	rbg-3	rbg-3	TBC1D5	RaB GAP related [Source:UniProtKB/TrEMBL;Acc:Q17491]
ENSG00000126581	BECN1	bec-1	bec-1		Beclin homolog [Source:UniProtKB/Swiss-Prot;Acc:Q22592]
ENSG00000188167	TMPPE	F40B5.2, T23G7.2	T23G7.2		Putative metallophosphoesterase F40B5.2 [Source:UniProtKB/Swiss-Prot;Acc:Q09320]
ENSG00000107669	ATE1	K07A1.9	K07A1.9
ENSG00000140534	TICRR	ZK484.4	ZK484.4
ENSG00000171103, ENSG00000166166	TRMT61B, TRMT61A	W02A11.1	W02A11.1		tRNA (adenine(58)-N(1))-methyltransferase catalytic subunit TRMT61A [Source:UniProtKB/TrEMBL;Acc:G5EGR8]
ENSG00000105793, ENSG00000101181	GTPBP10, MTG2	C26E6.12, M01E5.2	C26E6.12
ENSG00000132763	MMACHC	cblc-1	cblc-1		MMACHC-like protein [Source:UniProtKB/Swiss-Prot;Acc:Q7Z144]
ENSG00000087299	L2HGDH	Y45G12B.3	Y45G12B.3	L2HGDH	L-2-hydroxyglutarate dehydrogenase, mitochondrial [Source:UniProtKB/Swiss-Prot;Acc:Q9N4Z0]
ENSG00000175054	ATR	atl-1	atl-1	ATR	Serine/threonine-protein kinase ATR [Source:UniProtKB/Swiss-Prot;Acc:Q22258]
ENSG00000161800	RACGAP1	cyk-4	cyk-4		CYtoKinesis defect [Source:UniProtKB/TrEMBL;Acc:Q9XUS9]
ENSG00000162300	ZFPL1	Y45G12B.2	Y45G12B.2		Zinc finger protein-like 1 homolog [Source:UniProtKB/Swiss-Prot;Acc:Q9N4Y9]
ENSG00000122966	CIT	W02B8.2, F59A6.5	F59A6.5
ENSG00000136518, ENSG00000077080	ACTL6B, ACTL6A	swsn-6	swsn-6	ACTL6A	SWI/SNF nucleosome remodeling complex component [Source:UniProtKB/TrEMBL;Acc:Q9N4N4]
ENSG00000125149	C16orf70	T01G9.2	T01G9.2	C16orf70	UPF0183 protein T01G9.2 [Source:UniProtKB/Swiss-Prot;Acc:P34692]
ENSG00000101210, ENSG00000156508	EEF1A2, EEF1A1	eef-1A.1, eef-1A.2	eef-1A.1	EEF1A2	Elongation factor 1-alpha [Source:UniProtKB/Swiss-Prot;Acc:P53013]
ENSG00000113593	PPWD1	cyn-15	cyn-15		CYclophyliN [Source:UniProtKB/TrEMBL;Acc:Q9U1Q3]
ENSG00000156831	NSMCE2	ZK1248.11	ZK1248.11	NSMCE2
ENSG00000138674, ENSG00000075826	SEC31B, SEC31A	sec-31	sec-31	SEC31A	Yeast SEC homolog [Source:UniProtKB/TrEMBL;Acc:G5EFY6]
ENSG00000149311	ATM	atm-1	atm-1	ATM	Serine/threonine-protein kinase ATM [Source:UniProtKB/Swiss-Prot;Acc:Q9N3Q4]
ENSG00000131747, ENSG00000077097	TOP2A, TOP2B	R05D3.12, top-2, cin-4	top-2	TOP2A	Putative DNA topoisomerase 2, mitochondrial [Source:UniProtKB/Swiss-Prot;Acc:P34534]
ENSG00000198836	OPA1	eat-3	eat-3
ENSG00000143457, ENSG00000113384	GOLPH3L, GOLPH3	Y47G6A.18	Y47G6A.18	GOLPH3L
ENSG00000171960	PPIH	cyn-11	cyn-11		Peptidyl-prolyl cis-trans isomerase 11 [Source:UniProtKB/Swiss-Prot;Acc:P52018]
ENSG00000112578	BYSL	byn-1	byn-1		Cell adhesion protein byn-1 [Source:UniProtKB/Swiss-Prot;Acc:Q20932]
ENSG00000115267, ENSG00000187790, ENSG00000107201, ENSG00000260178, ENSG00000108771	FANCM, DHX58, IFIH1, DDX58	drh-3, drh-1	drh-3, drh-1		Dicer Related Helicase [Source:UniProtKB/TrEMBL;Acc:Q93413]
ENSG00000135587	SMPD2	T27F6.6	T27F6.6		Putative neutral sphingomyelinase [Source:UniProtKB/Swiss-Prot;Acc:O45870]
ENSG00000112893, ENSG00000196547	MAN2A1, MAN2A2	aman-2, aman-3	aman-2		Alpha-mannosidase [Source:UniProtKB/TrEMBL;Acc:Q2PJ74]
ENSG00000169679	BUB1	bub-1	bub-1	BUB1	Mitotic checkpoint serine/threonine-protein kinase bub-1 [Source:UniProtKB/Swiss-Prot;Acc:Q21776]
ENSG00000095564	BTAF1	btf-1	btf-1	BTAF1	BTAF (TBP-associated factor) homolog [Source:UniProtKB/TrEMBL;Acc:G5EF07]
ENSG00000091622, ENSG00000090975, ENSG00000180957, ENSG00000110697, ENSG00000174238	PITPNM3, PITPNB, PITPNM2, PITPNA, PITPNM1	pitp-1, Y54F10AR.1	Y54F10AR.1	PITPNB	PhosphatidylInositol Transfer Protein family [Source:UniProtKB/TrEMBL;Acc:G5EED9]
ENSG00000185024	BRF1	brf-1	brf-1		BRF (Transcription factor) homolog [Source:UniProtKB/TrEMBL;Acc:A0A131MCT5]
ENSG00000164346	NSA2	W09C5.1	W09C5.1
ENSG00000213341, ENSG00000143466, ENSG00000183735, ENSG00000104365	TBK1, IKBKB, CHUK	Y39G8B.5, ikke-1	ikke-1	TBK1, CHUK
ENSG00000161202, ENSG00000107404, ENSG00000004975	DVL1, DVL2, DVL3	dsh-2, mig-5, dsh-1	dsh-2, mig-5		DiSHevelled related [Source:UniProtKB/TrEMBL;Acc:Q18239]
ENSG00000115694, ENSG00000102572, ENSG00000134602	STK25, STK24, STK26	gck-1	gck-1	STK24	Germinal center kinase 1 [Source:UniProtKB/Swiss-Prot;Acc:H2L099]
ENSG00000131013	PPIL4	sig-7	sig-7		Peptidyl-prolyl cis-trans isomerase sig-7 [Source:UniProtKB/Swiss-Prot;Acc:G5EEW6]
ENSG00000133316	WDR74	T06E6.1	T06E6.1
ENSG00000057757	PITHD1	ZK353.9	ZK353.9		PITH domain-containing protein ZK353.9 [Source:UniProtKB/Swiss-Prot;Acc:Q95ZI6]
ENSG00000171421	MRPL36	mrpl-36	mrpl-36		Ribosomal protein [Source:UniProtKB/TrEMBL;Acc:Q7YWY8]
ENSG00000138160	KIF11	bmk-1	bmk-1	KIF11	Kinesin-like protein [Source:UniProtKB/TrEMBL;Acc:G5EGL7]
ENSG00000136874	STX17	syx-17	syx-17		SYntaXin [Source:UniProtKB/TrEMBL;Acc:O62387]
ENSG00000175426, ENSG00000099139, ENSG00000140479, ENSG00000115257, ENSG00000160613, ENSG00000140564	PCSK4, PCSK7, FURIN, PCSK6, PCSK5, PCSK1	bli-4, kpc-1, C18H7.4	bli-4	PCSK5	Endoprotease bli-4 [Source:UniProtKB/Swiss-Prot;Acc:P51559]
ENSG00000184381	PLA2G6	D1037.5, W07A8.2, F47A4.5, C45B2.6, H23L24.2	W07A8.2
ENSG00000204195, ENSG00000166391, ENSG00000124003, ENSG00000205267, ENSG00000106384, ENSG00000062282, ENSG00000184210	MOGAT2, DGAT2L7P, MOGAT3, DGAT2L6, AWAT1, MOGAT1, DGAT2	dgtr-1, K07B1.4, F59A1.10, Y53G8B.2	dgtr-1		DGAT (Acyl-CoA:DiacylGlycerol AcylTransferase) Related [Source:UniProtKB/TrEMBL;Acc:Q23067]
ENSG00000149554	CHEK1	Y43D4A.6, chk-1, R02C2.1, kin-34, kin-33, R02C2.6	chk-1	CHEK1
ENSG00000164124	TMEM144	W06A7.4, F49C12.6, W02D3.4, T19A6.4, K07F5.12, R144.6	R144.6
ENSG00000173960, ENSG00000088833, ENSG00000215114	UBXN2A, NSFL1C, UBXN2B	ubxn-2	ubxn-2	UBXN2A, UBXN2B	UBX-containing protein in Nematodes [Source:UniProtKB/TrEMBL;Acc:Q86DD7]
ENSG00000113851	CRBN	M18.6	M18.6	CRBN
ENSG00000175390, ENSG00000230078	EIF3F	eif-3.F	eif-3.F	EIF3F	Eukaryotic translation initiation factor 3 subunit F [Source:UniProtKB/Swiss-Prot;Acc:Q18967]
ENSG00000147082, ENSG00000134057, ENSG00000157456, ENSG00000133101, ENSG00000145386	CCNA2, CCNB1, CCNB3, CCNA1, CCNB2	cyb-2.1, cyb-3, ZK507.6, cyb-2.2, cyb-1	cyb-2.2, cyb-2.1, cyb-1	CCNA2	CYclin B [Source:UniProtKB/TrEMBL;Acc:O45926]
ENSG00000166889	PATL1	patr-1	patr-1		Protein PAT1 homolog 1 [Source:UniProtKB/Swiss-Prot;Acc:Q20374]
ENSG00000197548	ATG7	atg-7	atg-7		AuTophaGy (Yeast Atg homolog) [Source:UniProtKB/TrEMBL;Acc:G5EBK4]
ENSG00000213985, ENSG00000138071	AC078899.1, ACTR2	arx-2	arx-2		Actin-related protein 2 [Source:UniProtKB/Swiss-Prot;Acc:P53489]
ENSG00000012963	UBR7	T22C1.1	T22C1.1	UBR7
ENSG00000090060, ENSG00000218823, ENSG00000115421	PAPOLG, PAPOLB, PAPOLA	pap-1, F43G6.5, T15H9.6	pap-1	PAPOLG, PAPOLA	Poly-A Polymerase [Source:UniProtKB/TrEMBL;Acc:Q9U2P3]
ENSG00000144233, ENSG00000101935	AMMECR1L, AMMECR1	R166.3	R166.3	AMMECR1L
ENSG00000167986	DDB1	ddb-1	ddb-1		DNA damage-binding protein 1 [Source:UniProtKB/Swiss-Prot;Acc:Q21554]
ENSG00000133657, ENSG00000159363, ENSG00000187527, ENSG00000127249	ATP13A5, ATP13A4, ATP13A2, ATP13A3	catp-6, catp-5, catp-7	catp-6	ATP13A3	Probable cation-transporting ATPase W08D2.5 [Source:UniProtKB/Swiss-Prot;Acc:Q27533]
ENSG00000104853, ENSG00000049656	CLPTM1, CLPTM1L	R166.2, C36B7.6, T13H5.8	R166.2
ENSG00000108592, ENSG00000122687	FTSJ3, FTSJ2	F45G2.9, H06I04.3	H06I04.3		rRNA methyltransferase 2, mitochondrial [Source:UniProtKB/Swiss-Prot;Acc:O62251]
ENSG00000162066	AMDHD2	F59B2.3	F59B2.3		N-acetylglucosamine-6-phosphate deacetylase [Source:UniProtKB/Swiss-Prot;Acc:P34480]
ENSG00000198839	ZNF277	ztf-7	ztf-7	ZNF277	Zinc finger putative Transcription Factor family [Source:UniProtKB/TrEMBL;Acc:Q20448]
ENSG00000110921	MVK	mvk-1	mvk-1		MeValonate Kinase [Source:UniProtKB/TrEMBL;Acc:Q9N4Z7]
ENSG00000081087	OSTM1	F42A8.3	F42A8.3	OSTM1
ENSG00000174669, ENSG00000112759, ENSG00000198246	SLC29A2, SLC29A3, SLC29A1	F16H11.3, C47A4.2, F44D12.9, ent-1, ent-3, ent-2	ent-1		Equilibrative Nucleoside Transporter; Equilibrative nucleoside transporter 1 [Source:UniProtKB/TrEMBL;Acc:G5EDJ3]
ENSG00000100138	SNU13	M28.5	M28.5		NHP2-like protein 1 homolog [Source:UniProtKB/Swiss-Prot;Acc:Q21568]
ENSG00000085274, ENSG00000112365, ENSG00000116809	MYNN, ZBTB24, ZBTB17	eor-1	eor-1		EOR-1 [Source:UniProtKB/TrEMBL;Acc:G5EDU4]
ENSG00000141748, ENSG00000162980, ENSG00000165997	ARL5B, ARL5C, ARL5A	arl-5	arl-5	ARL5B, ARL5A	ADP-ribosylation factor-like protein 5 [Source:UniProtKB/Swiss-Prot;Acc:P34212]
ENSG00000112237	CCNC	cic-1	cic-1		Cyclin-C [Source:UniProtKB/Swiss-Prot;Acc:Q9TYP2]
ENSG00000229048, ENSG00000128951	DUT, DUTP1	dut-1	dut-1		DeoxyUTPase; Deoxyuridinetriphosphatase [Source:UniProtKB/TrEMBL;Acc:G5EET2]
ENSG00000116459	ATP5F1	asb-2, asb-1	asb-1		ATP Synthase B homolog [Source:UniProtKB/TrEMBL;Acc:Q19126]
ENSG00000100353	EIF3D	eif-3.D	eif-3.D	EIF3D	Eukaryotic translation initiation factor 3 subunit D [Source:UniProtKB/Swiss-Prot;Acc:P30642]
ENSG00000205609, ENSG00000184110	EIF3C, EIF3CL	eif-3.C	eif-3.C		Eukaryotic translation initiation factor 3 subunit C [Source:UniProtKB/Swiss-Prot;Acc:O02328]
ENSG00000167005	NUDT21	cfim-1	cfim-1	NUDT21	Cleavage Factor IM (CFIm) homolog [Source:UniProtKB/TrEMBL;Acc:Q93716]
ENSG00000131381	RBSN	rabs-5	rabs-5		RABenoSyn (Trafficking protein) homolog [Source:UniProtKB/TrEMBL;Acc:W6SBE5]
ENSG00000160799	CCDC12	Y69A2AR.21	Y69A2AR.21
ENSG00000130177	CDC16	emb-27	emb-27		Cell division cycle protein 16 homolog [Source:UniProtKB/Swiss-Prot;Acc:G5EG38]
ENSG00000139908, ENSG00000212122, ENSG00000206203, ENSG00000162526, ENSG00000178093	TSSK2, TSSK3, TSSK4, TSSK6, TSSK1B	C27D6.11, Y38H8A.4, W02B12.12, tag-344	W02B12.12
ENSG00000181704	YIPF6	W02D9.2	W02D9.2
ENSG00000140382, ENSG00000064961	HMG20A, HMG20B	hmg-20	hmg-20		HMG [Source:UniProtKB/TrEMBL;Acc:Q9XVG8]
ENSG00000175305, ENSG00000105173	CCNE2, CCNE1	cye-1	cye-1	CCNE2	G1/S-specific cyclin-E [Source:UniProtKB/Swiss-Prot;Acc:O01501]
ENSG00000119720	NRDE2	nrde-2	nrde-2		Nuclear RNAi defective-2 protein [Source:UniProtKB/Swiss-Prot;Acc:G5EG51]
ENSG00000117360	PRPF3	prp-3	prp-3	PRPF3	Yeast PRP (Splicing factor) related [Source:UniProtKB/TrEMBL;Acc:Q21486]
ENSG00000183765	CHEK2	chk-2, T08D2.7	chk-2, T08D2.7		Serine/threonine-protein kinase chk-2 [Source:UniProtKB/Swiss-Prot;Acc:Q9U1Y5]
ENSG00000029364	SLC39A9	T01D3.5	T01D3.5	SLC39A9
ENSG00000147316	MCPH1	W04A8.1	W04A8.1	MCPH1
ENSG00000143155	TIPRL	ZK688.9	ZK688.9	TIPRL	TIP41-like protein [Source:UniProtKB/Swiss-Prot;Acc:P34274]
ENSG00000119707	RBM25	W04D2.6	W04D2.6	RBM25
ENSG00000114491	UMPS	R12E2.11, umps-1	R12E2.11, umps-1		Orotate phosphoribosyltransferase [Source:UniProtKB/Swiss-Prot;Acc:O61790]
ENSG00000158470	B4GALT5	W02B12.11	W02B12.11		N-acetyllactosamine synthase [Source:UniProtKB/TrEMBL;Acc:G5EGS9]
ENSG00000166822	TMEM170A	F43G9.13	F43G9.13	TMEM170A
ENSG00000170836	PPM1D	Y54F10BM.1	Y54F10BM.1
ENSG00000125912	NCLN	nra-2	nra-2		Nicalin [Source:UniProtKB/TrEMBL;Acc:A5JYX8]
ENSG00000076201	PTPN23	ego-2	ego-2		Enhancer of Glp-One (Glp-1); Enhancer of glp-1 [Source:UniProtKB/TrEMBL;Acc:G5EBN5]
ENSG00000185917	SETD4	set-29	set-29		SET (Trithorax/polycomb) domain containing [Source:UniProtKB/TrEMBL;Acc:Q9BPP1]
ENSG00000119929	CUTC	cutc-1	cutc-1	CUTC	Copper homeostasis protein cutC homolog [Source:UniProtKB/Swiss-Prot;Acc:P34630]
ENSG00000129351, ENSG00000056097, ENSG00000165209, ENSG00000105278	ZFR2, ILF3, ZFR, STRBP	Y95B8A.8	Y95B8A.8	STRBP
ENSG00000182632, ENSG00000163249, ENSG00000216671, ENSG00000108100	CCNYL2, CCNYL3, CCNY, CCNYL1	cyy-1	cyy-1	CCNY	Cyclin-Y [Source:UniProtKB/Swiss-Prot;Acc:P34624]
ENSG00000152430, ENSG00000205916, ENSG00000205944, ENSG00000187191, ENSG00000188120, ENSG00000092345	DAZ2, DAZ1, DAZ4, DAZ3, DAZL, BOLL	daz-1	daz-1		DAZ protein 1 [Source:UniProtKB/Swiss-Prot;Acc:Q20870]
ENSG00000144366	GULP1	ced-6	ced-6		Cell death protein 6 [Source:UniProtKB/Swiss-Prot;Acc:O76337]
ENSG00000150760, ENSG00000088538, ENSG00000128512, ENSG00000147459, ENSG00000134516	DOCK3, DOCK5, DOCK4, DOCK2, DOCK1	ced-5	ced-5	DOCK2	CED-5 [Source:UniProtKB/TrEMBL;Acc:G5EEN3]
ENSG00000008283, ENSG00000162144, ENSG00000071967	CYB561, CYB561A3, CYBRD1	F39G3.4, F55H2.5, F39G3.5	F55H2.5
ENSG00000158417	EIF5B	iffb-1	iffb-1		Eukaryotic translation initiation factor eIF5B; Initiation Factor Five B (eIF5B) [Source:UniProtKB/TrEMBL;Acc:G5EGT7]
ENSG00000099942, ENSG00000167193	CRK, CRKL	ced-2	ced-2		Cell death abnormality protein 2 [Source:UniProtKB/Swiss-Prot;Acc:Q9NHC3]
ENSG00000213463	SYNJ2BP	mics-1	mics-1		MItoChondrial Scaffolding protei [Source:UniProtKB/TrEMBL;Acc:Q22638]
ENSG00000143476	DTL	cdt-2	cdt-2		CDT (S. pombe CDC10 Dependent Transcript) homolog [Source:UniProtKB/TrEMBL;Acc:Q22059]
ENSG00000166816	LDHD	rrf-1, ego-1, rrf-3, rrf-2, F32D8.12	ego-1, rrf-3, rrf-1		RNA-dependent RNA polymerase Family; RRF-1 [Source:UniProtKB/TrEMBL;Acc:G5ECM1]
ENSG00000142892	PIGK	hpo-4	hpo-4		Putative GPI-anchor transamidase [Source:UniProtKB/Swiss-Prot;Acc:P49048]
ENSG00000167513	CDT1	cdt-1	cdt-1		CDT (S. pombe CDC10 Dependent Transcript) homolog [Source:UniProtKB/TrEMBL;Acc:Q86S68]
ENSG00000163950	SLBP	cdl-1	cdl-1	SLBP	Histone RNA hairpin-binding protein [Source:UniProtKB/Swiss-Prot;Acc:Q09599]
ENSG00000010292	NCAPD2	dpy-28	dpy-28	NCAPD2	Condensin complex subunit 1 [Source:UniProtKB/Swiss-Prot;Acc:Q9U2M1]
ENSG00000164609	SLU7	K07C5.6	K07C5.6	SLU7	Pre-mRNA-splicing factor SLU7 [Source:UniProtKB/Swiss-Prot;Acc:Q21278]
ENSG00000136807	CDK9	cdk-9	cdk-9		Probable cyclin-dependent kinase 9 [Source:UniProtKB/Swiss-Prot;Acc:Q9TVL3]
ENSG00000132964, ENSG00000155111	CDK8, CDK19	cdk-8	cdk-8		Cyclin-dependent kinase 8 [Source:UniProtKB/Swiss-Prot;Acc:P90866]
ENSG00000162408	NOL9	nol-9	nol-9		Polynucleotide 5'-hydroxyl-kinase nol-9 [Source:UniProtKB/Swiss-Prot;Acc:Q9U3B6]
ENSG00000165775, ENSG00000182814, ENSG00000069509	FUNDC2, FUNDC1, FUNDC2P2	T06D8.7	T06D8.7	FUNDC1
ENSG00000168002	POLR2G	rpb-7	rpb-7		RNA Polymerase II (B) subunit [Source:UniProtKB/TrEMBL;Acc:Q9N3C9]
ENSG00000108504, ENSG00000164885, ENSG00000170312, ENSG00000123374	CDK1, CDK2, CDK5	cdk-2, cdk-1, cdk-5	cdk-2, cdk-1	CDK2	Cyclin-dependent kinase 2 [Source:UniProtKB/Swiss-Prot;Acc:O61847]
ENSG00000166197	NOLC1	dao-5	dao-5	NOLC1	Dauer or Aging adult Overexpression [Source:UniProtKB/TrEMBL;Acc:Q9XVS4]
ENSG00000175203	DCTN2	dnc-2	dnc-2		Probable dynactin subunit 2 [Source:UniProtKB/Swiss-Prot;Acc:Q09248]
ENSG00000015171, ENSG00000101040	ZMYND8, ZMYND11	bra-2, bra-1	bra-2		BMP Receptor Associated protein family [Source:UniProtKB/TrEMBL;Acc:O01918]
ENSG00000137522, ENSG00000145428	RNF175, RNF121	rnf-121	rnf-121		RING finger protein 121 [Source:RefSeq peptide;Acc:NP_497832]
ENSG00000116830, ENSG00000071794	TTF2, HLTF	F59A7.8, Y113G7B.14, F54E12.2, T23H2.3	F54E12.2
ENSG00000117500, ENSG00000099203	TMED1, TMED5	K08E4.6	K08E4.6
ENSG00000100697	DICER1	dcr-1	dcr-1	DICER1	Endoribonuclease dcr-1 [Source:UniProtKB/Swiss-Prot;Acc:P34529]
ENSG00000151229, ENSG00000160326, ENSG00000136856	SLC2A6, SLC2A8, SLC2A13	hmit-1.2, K08H10.6, hmit-1.3, K08F9.1, Y61A9LA.1, C35A11.4, hmit-1.1, Y37A1A.3	Y61A9LA.1	SLC2A13	H(+) MyoInositol coTransporter [Source:UniProtKB/TrEMBL;Acc:Q9XXQ9]
ENSG00000144848	ATG3	atg-3	atg-3		AuTophaGy (Yeast Atg homolog) [Source:UniProtKB/TrEMBL;Acc:U4PRD2]
ENSG00000102796	DHRS12	dhs-1	dhs-1		DeHydrogenases, Short chain [Source:UniProtKB/TrEMBL;Acc:P91013]
ENSG00000164440, ENSG00000131002, ENSG00000084652, ENSG00000086712	TXLNB, TXLNA, TXLNGY, TXLNG	T22C1.6	T22C1.6
ENSG00000143409, ENSG00000128923	FAM63B, FAM63A	Y55F3AM.9	Y55F3AM.9
ENSG00000148154	UGCG	cgt-3, cgt-2, cgt-1	cgt-3		Ceramide glucosyltransferase 3 [Source:UniProtKB/Swiss-Prot;Acc:Q21054]
ENSG00000125733, ENSG00000137942, ENSG00000187239	FNBP1L, TRIP10, FNBP1	toca-1, toca-2	toca-2	FNBP1	Transducer of Cdc42-dependent actin assembly protein 1 homolog [Source:UniProtKB/Swiss-Prot;Acc:Q19253]
ENSG00000151065, ENSG00000162290	DCP1B	dcap-1	dcap-1		mRNA DeCAPping enzyme [Source:UniProtKB/TrEMBL;Acc:Q9N363]
ENSG00000128191	DGCR8	pash-1	pash-1		PArtner of DroSHa (DRSH-1 interactor) [Source:UniProtKB/TrEMBL;Acc:U4PRH5]
ENSG00000220474, ENSG00000182327, ENSG00000224051	CPTP, GLTPD2	K08E4.2, tag-296, F49D11.10	tag-296
ENSG00000140950	TLDC1	eak-7	eak-7		Enhancer of AKt-1 null [Source:UniProtKB/TrEMBL;Acc:Q21342]
ENSG00000138767, ENSG00000113300	CNOT6, CNOT6L	ccr-4	ccr-4		CCR (Yeast CCR4/NOT complex component) homolog; CCR4 [Source:UniProtKB/TrEMBL;Acc:G5EE09]
ENSG00000116675, ENSG00000178950, ENSG00000204113, ENSG00000115977, ENSG00000138756	DNAJC6, BMP2K, GAK, AAK1, BMP2KL	dnj-25, sel-5, tag-257	dnj-25, sel-5	BMP2K	Auxilin; DNaJ domain (Prokaryotic heat shock protein) [Source:UniProtKB/TrEMBL;Acc:G5EDJ6]
ENSG00000105618	PRPF31	prp-31	prp-31		Yeast PRP (Splicing factor) related [Source:UniProtKB/TrEMBL;Acc:Q9N592]
ENSG00000079785	DDX1	Y55F3BR.1	Y55F3BR.1
ENSG00000226400, ENSG00000090372, ENSG00000196792, ENSG00000115808	STRN4, STRN, CTD-2269E23.2, STRN3	cash-1	cash-1	STRN4, STRN3	CKA And Striatin Homolog [Source:UniProtKB/TrEMBL;Acc:G5EE12]
ENSG00000179562	GCC1	T05G5.9	T05G5.9
ENSG00000141252	VPS53	vps-53	vps-53		Vacuolar protein sorting-associated protein 53 homolog [Source:UniProtKB/Swiss-Prot;Acc:P34561]
ENSG00000259880, ENSG00000185267, ENSG00000145050	CDNF, MANF	Y54G2A.23	Y54G2A.23		MANF/CDNF-like protein [Source:UniProtKB/Swiss-Prot;Acc:Q9N3B0]
ENSG00000172992	DCAKD	T05G5.5	T05G5.5		Dephospho-CoA kinase 1 [Source:UniProtKB/TrEMBL;Acc:E5QCF6]
ENSG00000147813	NAPRT	Y54G2A.17	Y54G2A.17
ENSG00000102890, ENSG00000062598, ENSG00000155849	ELMO3, ELMO1, ELMO2	ced-12	ced-12		Cell death abnormality protein 12 [Source:UniProtKB/Swiss-Prot;Acc:Q8STE5]
ENSG00000114374, ENSG00000124486, ENSG00000162402	USP24, USP9Y, USP9X	T24B8.7	T24B8.7	USP9X	Ubiquitin carboxyl-terminal hydrolase [Source:UniProtKB/TrEMBL;Acc:N1NVC2]
ENSG00000110011	DNAJC4	dnj-4	dnj-4		DNaJ domain (Prokaryotic heat shock protein) [Source:UniProtKB/TrEMBL;Acc:P91014]
ENSG00000198862	LTN1	Y54E10A.11	Y54E10A.11		E3 ubiquitin-protein ligase listerin [Source:UniProtKB/Swiss-Prot;Acc:Q65XX2]
ENSG00000126698	DNAJC8	dnj-30	dnj-30		DNaJ domain (Prokaryotic heat shock protein) [Source:UniProtKB/TrEMBL;Acc:A0A078BS22]
ENSG00000114487, ENSG00000133422, ENSG00000159256, ENSG00000133131	MORC2, MORC3, MORC1, MORC4	morc-1	morc-1	MORC2, MORC3	MORC (Mouse microrchidia) family CW-type zinc finger protein [Source:UniProtKB/TrEMBL;Acc:Q23243]
ENSG00000182858	ALG12	ZC513.5	ZC513.5		Probable Dol-P-Man:Man(7)GlcNAc(2)-PP-Dol alpha-1,6-mannosyltransferase [Source:UniProtKB/Swiss-Prot;Acc:Q23361]
ENSG00000155438	NIFK	T04A8.6	T04A8.6
ENSG00000135845	PIGC	T20D3.8	T20D3.8
ENSG00000203668, ENSG00000188419	CHM, CHML	rep-1	rep-1	CHM	Rab Escort Protein homolog [Source:UniProtKB/TrEMBL;Acc:H2L0G6]
ENSG00000105287, ENSG00000184304, ENSG00000115825	PRKD2, PRKD1, PRKD3	dkf-1, dkf-2	dkf-2	PRKD3	Serine/threonine-protein kinase dkf-1 [Source:UniProtKB/Swiss-Prot;Acc:Q9XUJ7]
ENSG00000096080	MRPS18A	mrps-18A	mrps-18A	MRPS18A	Mitochondrial Ribosomal Protein, Small [Source:UniProtKB/TrEMBL;Acc:Q95PY4]
ENSG00000166902	MRPL16	mrpl-16	mrpl-16		Mitochondrial Ribosomal Protein, Large [Source:UniProtKB/TrEMBL;Acc:Q22140]
ENSG00000173207, ENSG00000178556, ENSG00000123975, ENSG00000268942, ENSG00000233281	CKS1B, CKS2, CKS1BP3, CKS1BP6	cks-1, Y71G12B.27	cks-1, Y71G12B.27		Cyclin-dependent kinases regulatory subunit [Source:UniProtKB/Swiss-Prot;Acc:Q17868]
ENSG00000027644, ENSG00000171105, ENSG00000140443	IGF1R, INSRR, INSR	daf-2	daf-2	INSR	Insulin-like receptor Insulin-like receptor subunit alpha Insulin-like receptor subunit beta [Source:UniProtKB/Swiss-Prot;Acc:Q968Y9]
ENSG00000110367, ENSG00000269612	DDX6	cgh-1	cgh-1	DDX6	ATP-dependent RNA helicase cgh-1 [Source:UniProtKB/Swiss-Prot;Acc:Q95YF3]
ENSG00000172432, ENSG00000100226	GTPBP2, GTPBP1	cgp-1, T04H1.2	cgp-1	GTPBP2	GTP-binding protein cgp-1 [Source:UniProtKB/Swiss-Prot;Acc:Q18905]
ENSG00000012983, ENSG00000011566, ENSG00000104814, ENSG00000168067	MAP4K3, MAP4K2, MAP4K5, MAP4K1	gck-2	gck-2	MAP4K3	Mitogen-activated protein kinase kinase kinase kinase [Source:UniProtKB/TrEMBL;Acc:Q23290]
ENSG00000114480	GBE1	T04A8.7	T04A8.7		Alpha-amylase [Source:UniProtKB/TrEMBL;Acc:Q86G92]
ENSG00000122674, ENSG00000146574	CCZ1B, CCZ1	ccz-1	ccz-1
ENSG00000162695, ENSG00000145740, ENSG00000164756, ENSG00000115194, ENSG00000158014, ENSG00000196660, ENSG00000170385, ENSG00000104154	SLC30A8, SLC30A10, SLC30A3, SLC30A2, SLC30A1, SLC30A7, SLC30A4, SLC30A5	ttm-1, cdf-2, cdf-1, Y105E8A.3	Y105E8A.3		Toxin-regulated Targets of MAPK [Source:UniProtKB/TrEMBL;Acc:O45923]
ENSG00000186684, ENSG00000019186, ENSG00000111012, ENSG00000135929, ENSG00000140459	CYP27A1, CYP27C1, CYP24A1, CYP11A1, CYP27B1	cyp-44A1, ZK177.4	cyp-44A1, ZK177.4		Probable cytochrome P450 CYP44 [Source:UniProtKB/Swiss-Prot;Acc:Q09660]
ENSG00000164134, ENSG00000172766	NAA16, NAA15	hpo-29	hpo-29
ENSG00000173406, ENSG00000153071	DAB1, DAB2	dab-1	dab-1	DAB1	DAB (Drosophila disabled) homolog [Source:UniProtKB/TrEMBL;Acc:A5JYR4]
ENSG00000147174	ACRC	ZK328.4	ZK328.4
ENSG00000113810	SMC4	dpy-27, smc-4	smc-4		Chromosome condensation protein dpy-27 [Source:UniProtKB/Swiss-Prot;Acc:P48996]
ENSG00000005156	LIG3	K07C5.3	K07C5.3
ENSG00000213551	DNAJC9	dnj-23	dnj-23		DNaJ domain (Prokaryotic heat shock protein) [Source:UniProtKB/TrEMBL;Acc:Q22751]
ENSG00000167645, ENSG00000174851	YIF1B, YIF1A	yif-1	yif-1		YIP1-Interacting Factor homolog [Source:UniProtKB/TrEMBL;Acc:Q20913]
ENSG00000101361, ENSG00000235796	NOP56	K07C5.4	K07C5.4		Uncharacterized NOP5 family protein K07C5.4 [Source:UniProtKB/Swiss-Prot;Acc:Q21276]
ENSG00000101246	ARFRP1	Y54E10BR.2	Y54E10BR.2
ENSG00000176108	CHMP6	vps-20	vps-20		Related to yeast Vacuolar Protein Sorting factor [Source:UniProtKB/TrEMBL;Acc:Q9BL60]
ENSG00000215915, ENSG00000160072, ENSG00000219860, ENSG00000197785	ATAD3A, ATAD3B, ATAD3C	atad-3	atad-3		ATPase family AAA domain-containing protein 3 [Source:UniProtKB/Swiss-Prot;Acc:Q20748]
ENSG00000135392	DNAJC14	dnj-5	dnj-5		DnaJ homolog dnj-5 [Source:UniProtKB/Swiss-Prot;Acc:Q09446]
ENSG00000204256, ENSG00000235307, ENSG00000164366, ENSG00000137948, ENSG00000141867, ENSG00000234704, ENSG00000234507, ENSG00000230678, ENSG00000169925, ENSG00000215077	CCDC127, BRD3, BRD2, BRDT, BRD4	bet-2, F59F5.7, bet-1	bet-1	BRD3	BET (Two bromodomains) family protein [Source:UniProtKB/TrEMBL;Acc:Q20948]
ENSG00000105325	FZR1	fzr-1	fzr-1		FiZzy Related family [Source:UniProtKB/TrEMBL;Acc:Q09649]
ENSG00000126106	TMEM53	T24H10.4, C09B8.4, T10B11.6	T10B11.6
ENSG00000168589, ENSG00000125971	DYNLRB1, DYNLRB2	dyrb-1	dyrb-1		Dynein light chain roadblock [Source:UniProtKB/TrEMBL;Acc:Q22752]
ENSG00000105821	DNAJC2	dnj-11	dnj-11	DNAJC2	DNaJ domain (Prokaryotic heat shock protein) [Source:UniProtKB/TrEMBL;Acc:Q94216]
ENSG00000184481, ENSG00000150907, ENSG00000204060, ENSG00000118689	FOXO3, FOXO4, FOXO1, FOXO6	daf-16	daf-16	FOXO3, FOXO1	Forkhead box protein O [Source:UniProtKB/Swiss-Prot;Acc:O16850]
ENSG00000231167, ENSG00000187772, ENSG00000065978, ENSG00000006047, ENSG00000131914, ENSG00000060138	LIN28A, YBX2, LIN28B, YBX1P2, YBX1, YBX3	cey-3, cey-2, lin-28, cey-1, cey-4	cey-3	LIN28B	C. Elegans Y-box [Source:UniProtKB/TrEMBL;Acc:P91398]
ENSG00000094804, ENSG00000085840	CDC6, ORC1	cdc-6, orc-1	cdc-6		Cell Division Cycle related [Source:UniProtKB/TrEMBL;Acc:P91155]
ENSG00000132141, ENSG00000146731	CCT6A, CCT6B	cct-6	cct-6		T-complex protein 1 subunit zeta [Source:UniProtKB/Swiss-Prot;Acc:P46550]
ENSG00000137094, ENSG00000187726, ENSG00000162616, ENSG00000132002	DNAJB13, DNAJB1, DNAJB4, DNAJB5	dnj-13	dnj-13		DNaJ domain (Prokaryotic heat shock protein) [Source:UniProtKB/TrEMBL;Acc:Q20774]
ENSG00000170473	PYM1	T20G5.9	T20G5.9
ENSG00000130764	LRRC47	Y54E10A.6	Y54E10A.6
ENSG00000143751	SDE2	F53F4.14	F53F4.14
ENSG00000168724	DNAJC21	dnj-17	dnj-17		DNaJ domain (Prokaryotic heat shock protein) [Source:UniProtKB/TrEMBL;Acc:O62360]
ENSG00000171490	RSL1D1	F53F4.11	F53F4.11
ENSG00000083799	CYLD	cyld-1	cyld-1	CYLD	CYLinDromatosis (Human disease gene) homolog [Source:UniProtKB/TrEMBL;Acc:Q7JMS4]
ENSG00000137449, ENSG00000214575, ENSG00000113742, ENSG00000107864	CPEB4, CPEB1, CPEB2, CPEB3	cpb-2, fog-1, cpb-1, cpb-3	fog-1, cpb-1, cpb-3	CPEB2, CPEB4	Cytoplasmic polyadenylation element-binding protein 2 [Source:UniProtKB/Swiss-Prot;Acc:Q18317]
ENSG00000001084	GCLC	gcs-1	gcs-1	GCLC	Glutamate--cysteine ligase [Source:UniProtKB/Swiss-Prot;Acc:Q20117]
ENSG00000115970	THADA	Y92H12A.5	Y92H12A.5
ENSG00000166266	CUL5	cul-5	cul-5	CUL5	Cullin-5 [Source:UniProtKB/Swiss-Prot;Acc:Q23639]
ENSG00000139990	DCAF5	R11D1.1	R11D1.1
ENSG00000071894, ENSG00000261230	CPSF1	cpsf-1	cpsf-1		Probable cleavage and polyadenylation specificity factor subunit 1 [Source:UniProtKB/Swiss-Prot;Acc:Q9N4C2]
ENSG00000073464, ENSG00000109572, ENSG00000171365	CLCN4, CLCN5, CLCN3	clh-5	clh-5	CLCN3	Chloride channel protein [Source:UniProtKB/TrEMBL;Acc:G5EGT4]
ENSG00000183513	COA5	Y18D10A.16	Y18D10A.16
ENSG00000105216, ENSG00000262860, ENSG00000149657	LSM14A, LSM14B	car-1	car-1	LSM14B	Cytokinesis, Apoptosis, RNA-associated [Source:UniProtKB/TrEMBL;Acc:Q9XW17]
ENSG00000180098, ENSG00000137434	TRNAU1AP, C6orf52	T07F10.3	T07F10.3
ENSG00000116954, ENSG00000025039	RRAGC, RRAGD	ragc-1	ragc-1		RAs-related GTP binding protein C homolog [Source:UniProtKB/TrEMBL;Acc:A0A061ACG4]
ENSG00000171608, ENSG00000121879, ENSG00000105851, ENSG00000051382	PIK3CB, PIK3CG, PIK3CD, PIK3CA	age-1	age-1	PIK3CG	Phosphatidylinositol 3-kinase age-1 [Source:UniProtKB/Swiss-Prot;Acc:Q94125]
ENSG00000103150	MLYCD	mlcd-1	mlcd-1		MaLonyl CoA Decarboxylase [Source:UniProtKB/TrEMBL;Acc:Q20048]
ENSG00000101224, ENSG00000158402, ENSG00000164045	CDC25A, CDC25B, CDC25C	cdc-25.1, cdc-25.3, cdc-25.4, cdc-25.2	cdc-25.1	CDC25A	M-phase inducer phosphatase cdc-25.1 [Source:UniProtKB/Swiss-Prot;Acc:O44552]
ENSG00000124380	SNRNP27	snrp-27	snrp-27		Small Nuclear RibonucleoProtein homolog [Source:UniProtKB/TrEMBL;Acc:Q21739]
ENSG00000084070, ENSG00000105963, ENSG00000112305, ENSG00000184060	ADAP2, SMAP1, SMAP2, ADAP1	W09D10.1	W09D10.1
ENSG00000100632	ERH	F35G12.11, T21C9.4	F35G12.11	ERH	Enhancer of rudimentary homolog [Source:UniProtKB/TrEMBL;Acc:Q20057]
ENSG00000167548, ENSG00000055609	KMT2C, KMT2D	set-16	set-16		Histone-lysine N-methyltransferase [Source:UniProtKB/TrEMBL;Acc:G5EGI1]
ENSG00000165661, ENSG00000116260	QSOX2, QSOX1	F47B7.2, T10H10.2, F35G2.1	F35G2.1	QSOX2	Sulfhydryl oxidase [Source:UniProtKB/TrEMBL;Acc:Q95QF9]
ENSG00000166579, ENSG00000072864	NDEL1, NDE1	nud-2	nud-2		Aspergillus NUclear Division related [Source:UniProtKB/TrEMBL;Acc:O45717]
ENSG00000087586, ENSG00000178999, ENSG00000105146	AURKA, AURKC, AURKB	air-2	air-2		Aurora/IPL1-related protein kinase 2 [Source:UniProtKB/Swiss-Prot;Acc:O01427]
ENSG00000119383	PPP2R4	Y71H2AM.20	Y71H2AM.20		Serine/threonine-protein phosphatase 2A activator [Source:UniProtKB/TrEMBL;Acc:Q9BL35]
ENSG00000115593, ENSG00000143499, ENSG00000186532, ENSG00000185420	SMYD4, SMYD2, SMYD3, SMYD1	set-14, set-10, set-18, set-30	set-10, set-14	SMYD3	SET domain-containing protein 14 [Source:UniProtKB/Swiss-Prot;Acc:Q09415]
ENSG00000133083, ENSG00000130413, ENSG00000170390, ENSG00000163482	STK36, DCLK1, DCLK2, STK33	F32D8.1, air-1, zyg-8	zyg-8
ENSG00000177084	POLE	F33H2.5	F33H2.5
ENSG00000140350, ENSG00000136938, ENSG00000143401, ENSG00000214619, ENSG00000139223, ENSG00000265346, ENSG00000184701	ANP32A, ANP32E, ANP32B, ANP32D	T19H12.2, F33H2.3	T19H12.2, F33H2.3		Acidic leucine-rich nuclear phosphoprotein 32-related protein 2 [Source:UniProtKB/Swiss-Prot;Acc:O01615]
ENSG00000056050	C4orf27	JC8.7	JC8.7
ENSG00000157800, ENSG00000134955, ENSG00000160190	SLC37A1, SLC37A3, SLC37A2	T11G6.3, T11G6.2, T10C6.6, T11G6.4	T10C6.6	SLC37A3
ENSG00000110871	COQ5	coq-5	coq-5		2-methoxy-6-polyprenyl-1,4-benzoquinol methylase, mitochondrial [Source:UniProtKB/Swiss-Prot;Acc:P34666]
ENSG00000142230	SAE1	aos-1	aos-1		SUMO-activating enzyme subunit aos-1 [Source:UniProtKB/Swiss-Prot;Acc:Q17820]
ENSG00000185414, ENSG00000241962	MRPL30, RP11-111H13.1	mrpl-30	mrpl-30	MRPL30	Mitochondrial Ribosomal Protein, Large [Source:UniProtKB/TrEMBL;Acc:Q9UA63]
ENSG00000126787, ENSG00000170579, ENSG00000080845, ENSG00000198010, ENSG00000116544	DLGAP5, DLGAP2, DLGAP3, DLGAP1, DLGAP4	W03A5.4	W03A5.4	DLGAP5, DLGAP4
ENSG00000070814	TCOF1	attf-6	attf-6		AT hook Transcription Factor family [Source:UniProtKB/TrEMBL;Acc:Q9XW25]
ENSG00000171824	EXOSC10	crn-3	crn-3	EXOSC10	Cell death-related nuclease 3; Cell-death-Related Nuclease [Source:UniProtKB/TrEMBL;Acc:G5EBX6]
ENSG00000136045	PWP1	JC8.2	JC8.2
ENSG00000132824, ENSG00000111897, ENSG00000184716, ENSG00000168528, ENSG00000164300	SERINC3, SERINC2, SERINC5, SERINC4, SERINC1	Y57E12AL.1, R11H6.2	Y57E12AL.1	SERINC1
ENSG00000148606, ENSG00000181222	POLR3A, POLR2A	rpc-1, ama-1	ama-1		DNA-directed RNA polymerase subunit [Source:UniProtKB/TrEMBL;Acc:Q18566]
ENSG00000168496	FEN1	crn-1	crn-1		Flap endonuclease 1 [Source:UniProtKB/Swiss-Prot;Acc:Q9N3T2]
ENSG00000091483	FH	fum-1	fum-1	FH	Probable fumarate hydratase, mitochondrial [Source:UniProtKB/Swiss-Prot;Acc:O17214]
ENSG00000219039, ENSG00000183684	ALYREF, AC005102.1	aly-3, aly-1, aly-2	aly-3		Ref/ALY RNA export adaptor family [Source:UniProtKB/TrEMBL;Acc:Q21559]
ENSG00000169718	DUS1L	F36A2.2	F36A2.2
ENSG00000118420	UBE3D	Y71H2AM.3	Y71H2AM.3
ENSG00000109452, ENSG00000040933	INPP4A, INPP4B	R01H10.7	R01H10.7		Inositol polyphosphate-4-phosphatase [Source:UniProtKB/TrEMBL;Acc:Q8MUM1]
ENSG00000197586, ENSG00000187097	ENTPD5, ENTPD6	uda-1	uda-1	ENTPD5	Nucleoside-diphosphatase uda-1 [Source:UniProtKB/Swiss-Prot;Acc:Q9XU84]
ENSG00000140740	UQCRC2	ucr-2.3, ucr-2.2, ucr-2.1	ucr-2.3		Ubiquinol-Cytochrome c oxidoReductase complex [Source:UniProtKB/TrEMBL;Acc:Q9TZ33]
ENSG00000082068	WDR70	gad-1	gad-1		Gastrulation defective protein 1 [Source:UniProtKB/Swiss-Prot;Acc:O16519]
ENSG00000127955, ENSG00000087258, ENSG00000065135, ENSG00000114353, ENSG00000134183, ENSG00000214415	GNAI3, GNAI2, GNAT3, GNAT2, GNAO1, GNAI1	goa-1, odr-3, gpa-7, gpa-4, gpa-16	gpa-16		Guanine nucleotide-binding protein G(o) subunit alpha [Source:UniProtKB/Swiss-Prot;Acc:P51875]
ENSG00000166140	ZFYVE19	R11D1.10	R11D1.10
ENSG00000109832, ENSG00000157349, ENSG00000168872	DDX25, DDX19A, DDX19B	ddx-19	ddx-19		DEAD boX helicase homolog [Source:UniProtKB/TrEMBL;Acc:B7WN81]
ENSG00000149792, ENSG00000224296	MRPL49, MRPL49P1	mrpl-49	mrpl-49		Probable 39S ribosomal protein L49, mitochondrial [Source:UniProtKB/Swiss-Prot;Acc:Q21939]
ENSG00000158552, ENSG00000178381	ZFAND2B, ZFAND2A	aip-1	aip-1		Arsenite Inducible Protein [Source:UniProtKB/TrEMBL;Acc:Q9XUW8]
ENSG00000123338, ENSG00000061676	NCKAP1L, NCKAP1	gex-3	gex-3	NCKAP1	Membrane-associated protein gex-3 [Source:UniProtKB/Swiss-Prot;Acc:P55163]
ENSG00000116120	FARSB	fars-3	fars-3		Phenylalanine--tRNA ligase beta subunit [Source:UniProtKB/Swiss-Prot;Acc:Q19713]
ENSG00000163539, ENSG00000074054	CLASP1, CLASP2	cls-1, cls-2, cls-3	cls-2	CLASP1
ENSG00000101901	ALG13	hpo-17	hpo-17
ENSG00000160949	TONSL	K02B12.5	K02B12.5
ENSG00000165630	PRPF18	F32B6.3	F32B6.3	PRPF18
ENSG00000153132, ENSG00000127022	CLGN, CANX	cnx-1	cnx-1	CANX	Calnexin [Source:UniProtKB/Swiss-Prot;Acc:P34652]
ENSG00000166619	BLCAP	Y73E7A.6	Y73E7A.6		Bladder cancer related protein [Source:UniProtKB/TrEMBL;Acc:G5EE03]
ENSG00000111640, ENSG00000105679, ENSG00000235868, ENSG00000183663	GAPDH, RP11-44N17.1, GAPDHP31, GAPDHS	gpd-2, gpd-1, gpd-4, gpd-3	gpd-1		Glyceraldehyde-3-phosphate dehydrogenase 2 [Source:UniProtKB/Swiss-Prot;Acc:P17329]
ENSG00000096060, ENSG00000198225, ENSG00000088832, ENSG00000077800, ENSG00000004478, ENSG00000119782	FKBP1B, FKBP6, FKBP1C, FKBP1A, FKBP5, FKBP4	fkb-2, fkb-6, fkb-8	fkb-6	FKBP4, FKBP5	Peptidylprolyl isomerase [Source:UniProtKB/TrEMBL;Acc:Q9U2Q8]
ENSG00000074706, ENSG00000142675, ENSG00000149970, ENSG00000153721	IPCEF1, CNKSR3, CNKSR1, CNKSR2	cnk-1	cnk-1		Connector enhancer of kinase suppressor of ras [Source:UniProtKB/Swiss-Prot;Acc:G5EEW9]
ENSG00000138138	ATAD1	mspn-1	mspn-1	ATAD1	Mitochondrial sorting homolog [Source:UniProtKB/Swiss-Prot;Acc:P54815]
ENSG00000116580, ENSG00000163374	YY1AP1, GON4L	gon-4	gon-4
ENSG00000186642	PDE2A	pde-2	pde-2		Probable 3',5'-cyclic phosphodiesterase pde-2 [Source:UniProtKB/Swiss-Prot;Acc:P30645]
ENSG00000038532	CLEC16A	gop-1	gop-1	CLEC16A	Protein CLEC16A homolog [Source:UniProtKB/Swiss-Prot;Acc:P46578]
ENSG00000120837, ENSG00000148229	POLE3, NFYB	nfyb-1, T26A5.8	T26A5.8	NFYB	Nuclear transcription Factor Y, B (Beta) subunit [Source:UniProtKB/TrEMBL;Acc:O17286]
ENSG00000166887	VPS39	vps-39	vps-39		Related to yeast Vacuolar Protein Sorting factor [Source:UniProtKB/TrEMBL;Acc:Q9XUQ4]
ENSG00000105778	AVL9	T26A5.6	T26A5.6
ENSG00000115053, ENSG00000160014, ENSG00000143933, ENSG00000231409, ENSG00000241343, ENSG00000178363, ENSG00000214759, ENSG00000165502, ENSG00000198668	RPL36A, CALM1, NCL, CALML3, CALM3, CTD-2509G16.1, RPL36AL, RP11-83J16.1, CALM2	cmd-1, rpl-41, K07H8.10	K07H8.10	CALM1, NCL	Calmodulin [Source:UniProtKB/Swiss-Prot;Acc:O16305]
ENSG00000204628	GNB2L1	rack-1	rack-1		Guanine nucleotide-binding protein subunit beta-2-like 1 [Source:UniProtKB/Swiss-Prot;Acc:Q21215]
ENSG00000141580, ENSG00000196998	WDR45, WDR45B	epg-6	epg-6	WDR45	Ectopic P Granules [Source:UniProtKB/TrEMBL;Acc:E3CTH5]
ENSG00000196312, ENSG00000156875, ENSG00000148110	HIAT1, HIATL1, HIATL2	T25D3.4	T25D3.4
ENSG00000100522	GNPNAT1	gna-1, gna-2	gna-2	GNPNAT1	Glucosamine 6-phosphate N-acetyltransferase [Source:UniProtKB/Swiss-Prot;Acc:Q17427]
ENSG00000187555	USP7	math-33	math-33		Ubiquitin carboxyl-terminal hydrolase 7 [Source:UniProtKB/Swiss-Prot;Acc:Q7JKC3]
ENSG00000243335, ENSG00000154710	RABGEF1, KCTD7	rabx-5	rabx-5	RABGEF1	RAB eXchange factor [Source:UniProtKB/TrEMBL;Acc:Q8I100]
ENSG00000172269	DPAGT1	Y60A3A.14, Y60A3A.8, D1005.2, T08D2.2	Y60A3A.8
ENSG00000172273, ENSG00000020256, ENSG00000124092, ENSG00000102974	CTCFL, ZFP64, HINFP, CTCF	F39B2.1	F39B2.1	CTCF
ENSG00000164902	PHAX	Y71H2B.2	Y71H2B.2	PHAX
ENSG00000119878	CRIPT	C36B1.14	C36B1.14
ENSG00000100726	TELO2	clk-2	clk-2		Telomere length regulation protein clk-2 [Source:UniProtKB/Swiss-Prot;Acc:Q95YE9]
ENSG00000268226, ENSG00000165832, ENSG00000130826	TRUB1, DKC1	K01G5.5	K01G5.5	TRUB1	Putative H/ACA ribonucleoprotein complex subunit 4 [Source:UniProtKB/Swiss-Prot;Acc:O17919]
ENSG00000144182	LIPT1	C45G3.3	C45G3.3
ENSG00000105058	FAM32A	K01G5.8	K01G5.8
ENSG00000127337	YEATS4	gfl-1	gfl-1	YEATS4	GAS41-Like [Source:UniProtKB/TrEMBL;Acc:Q21501]
ENSG00000112531	QKI	gld-1, asd-2	gld-1		Female germline-specific tumor suppressor gld-1 [Source:UniProtKB/Swiss-Prot;Acc:Q17339]
ENSG00000083223, ENSG00000164329, ENSG00000134744	PAPD4, ZCCHC11, ZCCHC6	cid-1, gld-2, Y34F4.3, pup-2	cid-1	PAPD4	Caffeine Induced Death (S. pombe Cid) homolog [Source:UniProtKB/TrEMBL;Acc:Q09409]
ENSG00000152670, ENSG00000215301, ENSG00000067048	DDX3Y, DDX3X, DDX4	glh-4, F58G11.2, glh-2, glh-3, vbh-1, ZC317.1, mut-14, glh-1, Y38A10A.6, laf-1	glh-2, mut-14, glh-3, glh-1		ATP-dependent RNA helicase glh-4 [Source:UniProtKB/Swiss-Prot;Acc:O76743]
ENSG00000150347, ENSG00000032219, ENSG00000054267, ENSG00000196843	ARID4A, ARID5A, ARID5B, ARID4B	arid-1	arid-1	ARID4A, ARID5B	ARID (AT-rich Interactive Domain-containing protein) homolog [Source:UniProtKB/TrEMBL;Acc:A0A0K3AV74]
ENSG00000054611, ENSG00000065491	TBC1D22A, TBC1D22B	tbc-3	tbc-3		TBC (Tre-2/Bub2/Cdc16) domain family [Source:UniProtKB/TrEMBL;Acc:Q7JL36]
ENSG00000109133	TMEM33	Y37D8A.17	Y37D8A.17	TMEM33
ENSG00000167971, ENSG00000105186, ENSG00000163126, ENSG00000177981, ENSG00000113734, ENSG00000177303, ENSG00000101843, ENSG00000196199	ANKRD27, CASKIN1, CASKIN2, MPHOSPH8, PSMD10, BNIP1, ASB8, ANKRD23	cec-3, C46H3.3, sec-20	cec-3		Chromo domain-containing protein cec-3 [Source:UniProtKB/Swiss-Prot;Acc:P45968]
ENSG00000014216, ENSG00000135773, ENSG00000162909, ENSG00000184445, ENSG00000203697, ENSG00000137225, ENSG00000092529, ENSG00000162949, ENSG00000214711	CAPN1, CAPN8, CAPN9, CAPN2, CAPN11, KNTC1, CAPN3, CAPN14, CAPN13	clp-4, clp-3, clp-1, clp-7, clp-6, rod-1	rod-1	CAPN2	CaLPain family [Source:UniProtKB/TrEMBL;Acc:Q8IAA9]
ENSG00000254685	FPGT	K03H1.13	K03H1.13	FPGT
ENSG00000160695	VPS11	vps-11	vps-11		Vacuolar protein sorting-associated protein 11 homolog [Source:UniProtKB/Swiss-Prot;Acc:Q09600]
ENSG00000185272, ENSG00000076053	RBM11, RBM7	Y37D8A.21	Y37D8A.21	RBM11, RBM7
ENSG00000170089, ENSG00000051596	THOC3, RP11-423H2.1	thoc-3	thoc-3	THOC3	THO Complex (Transcription factor/nuclear export) subunit [Source:UniProtKB/TrEMBL;Acc:P91867]
ENSG00000062716	VMP1	epg-3	epg-3		Ectopic P granules protein 3 [Source:UniProtKB/Swiss-Prot;Acc:Q9XWU8]
ENSG00000107036	RIC1	R06F6.8	R06F6.8		Guanine nucleotide exchange factor subunit R06F6.8 [Source:UniProtKB/Swiss-Prot;Acc:Q09417]
ENSG00000174013	FBXO45	fsn-1	fsn-1	FBXO45	F-box/SPRY domain-containing protein 1 [Source:UniProtKB/Swiss-Prot;Acc:Q18223]
ENSG00000165304	MELK	pig-1	pig-1	MELK	Maternal embryonic leucine zipper kinase [Source:UniProtKB/Swiss-Prot;Acc:U4PR86]
ENSG00000101464	PIGU	T22C1.3	T22C1.3
ENSG00000168393	DTYMK	R53.2	R53.2
ENSG00000154767	XPC	xpc-1	xpc-1		XPC (Xeroderma Pigmentosum group C) DNA repair gene homolog [Source:UniProtKB/TrEMBL;Acc:Q9N4C3]
ENSG00000164287, ENSG00000117399	CDC20, CDC20B	fzy-1	fzy-1		WD repeat-containing protein fzy-1 [Source:UniProtKB/Swiss-Prot;Acc:Q09373]
ENSG00000175115, ENSG00000179364	PACS1, PACS2	tag-232	tag-232
ENSG00000141030	COPS3	csn-3	csn-3		COP9 signalosome complex subunit 3 [Source:UniProtKB/Swiss-Prot;Acc:Q9N425]
ENSG00000133597	ADCK2	Y32H12A.7	Y32H12A.7	ADCK2
ENSG00000129691	ASH2L	ash-2	ash-2		Set1/Ash2 histone methyltransferase complex subunit ash-2 [Source:UniProtKB/Swiss-Prot;Acc:G5EFZ3]
ENSG00000122121, ENSG00000108039	XPNPEP2, XPNPEP1	Y45G5AM.2, app-1	Y45G5AM.2
ENSG00000153989	NUS1	F37B12.3	F37B12.3	NUS1
ENSG00000127580	WDR24	Y32H12A.8	Y32H12A.8
ENSG00000107672	NSMCE4A	H21P03.2	H21P03.2
[truncated: 49 more rows]

## Sheet: FBF SP 25° vs Lin pum
Human ENSG	Human gene symbol	Worm public name	FBF targets (Worm public name)	PUM targets (Human gene symbol)	Gene description
[truncated: 957 more rows]

[truncated: 18 more sheets: Top 500 FBF SP 25° vs Hafner, Top 500 FBF SP 25° vs Lin pum, FBF-1 20° vs Hafner, FBF-1 20° vs Lin pum, Top 500 FBF-1 20° vs Hafner, Top 500 FBF-1 20° vs Lin pum, FBF-2 20° vs Hafner, FBF-2 20° vs Lin pum, Top 500 FBF-2 20° vs Hafner, Top 500 FBF-2 20° vs Lin pum, Block I vs Hafner, Block I vs Lin pum, Block II vs Hafner, Block II vs Lin pum, Block III vs Hafner, Block III vs Lin pum, GLD-1 vs Hafner, GLD-1 vs Lin pum]
